# Supplementary material for: Comparative Proteomics Analysis of Exosomes Identifies Key Pathways and Protein Markers Related to Breast Cancer Metastasis
Source: Int J Mol Sci. 2023 Feb 17;24(4):4033. doi: 10.3390/ijms24044033 (PMC9967130; doi:10.3390/ijms24044033)
Supplement: Supplementary file 1 [file ijms-24-04033-s001.zip]

Archive with 9 entries (9 files):
- Supplementary figures.pdf
- Table S1 Quantification results.xlsx
- Table S2 94 TOP100 proteins in ExoCarta.xlsx
- Table S3 DisGeNet results.xlsx
- Table S4 Altered Proteins.xlsx
- Table S5 TOP20 altered proteins (Tumor vs Control).xlsx
- Table S6 Altered proteins enriched in DisGeNet.xlsx
- Table S7 Metastasis-specific altered proteins.xlsx
- Table S8 TOP20 altered proteins (Metastatic vs Non-metastatic).xlsx
