# Supplementary material for: Comparative Proteomics Analysis of Exosomes Identifies Key Pathways and Protein Markers Related to Breast Cancer Metastasis
Source: Int J Mol Sci. 2023 Feb 17;24(4):4033. doi: 10.3390/ijms24044033 (PMC9967130; doi:10.3390/ijms24044033)
Supplement: Supplementary file 1 [file ijms-24-04033-s001.zip › Supplementary figures.pdf]

# Comparative Proteomics Analysis of Exosomes Identifies Key Pathways and Protein Markers Related to Breast Cancer Metastasis

Shichen Shen <sup>1,2,#</sup>, Chengjian Tu <sup>1,2,#</sup>, He Shen <sup>3</sup>, Jun Li <sup>1,2</sup>, Costa Frangou<sup>4</sup>, Jianmin Zhang <sup>3,\*</sup> and Jun Qu <sup>1,2,\*</sup>

<sup>1</sup> Department of Pharmaceutical Sciences, University at Buffalo, Buffalo, NY 14214, USA

<sup>2</sup> New York State Center of Excellence in Bioinformatics and Life Sciences, Buffalo, NY 14203, USA

<sup>3</sup> Department of Cancer Genetics and Genomics, Roswell Park Comprehensive Cancer Center, Buffalo, NY 14263, USA

<sup>4</sup> Department of Molecular and Cellular Biology, Roswell Park Comprehensive Cancer Center, Buffalo, NY 14263, USA

\* Correspondence: Jianmin.Zhang@roswellpark.org (J.Z.); JunQu@buffalo.edu (J.Q.); Tel: +1-(716)845-5929 (J.Z.); +1-(716)645-4821 (J.Q.)

## Supplementary Materials

- Figures S1 – S4
- Tables S1 – S8

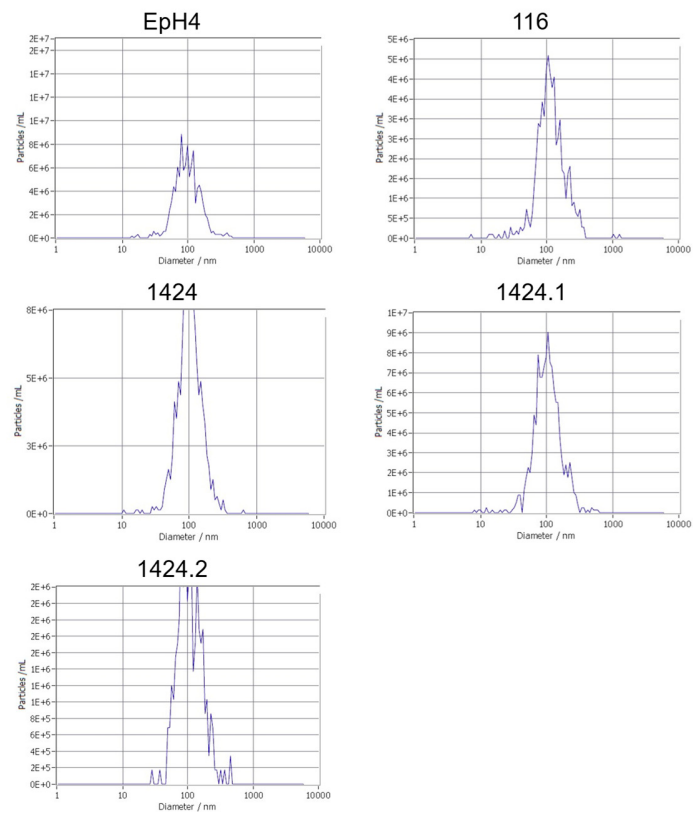

**Supplementary Figure S1.** Density curves (particles/mL) of exosome isolated from each EpH4 cell line.

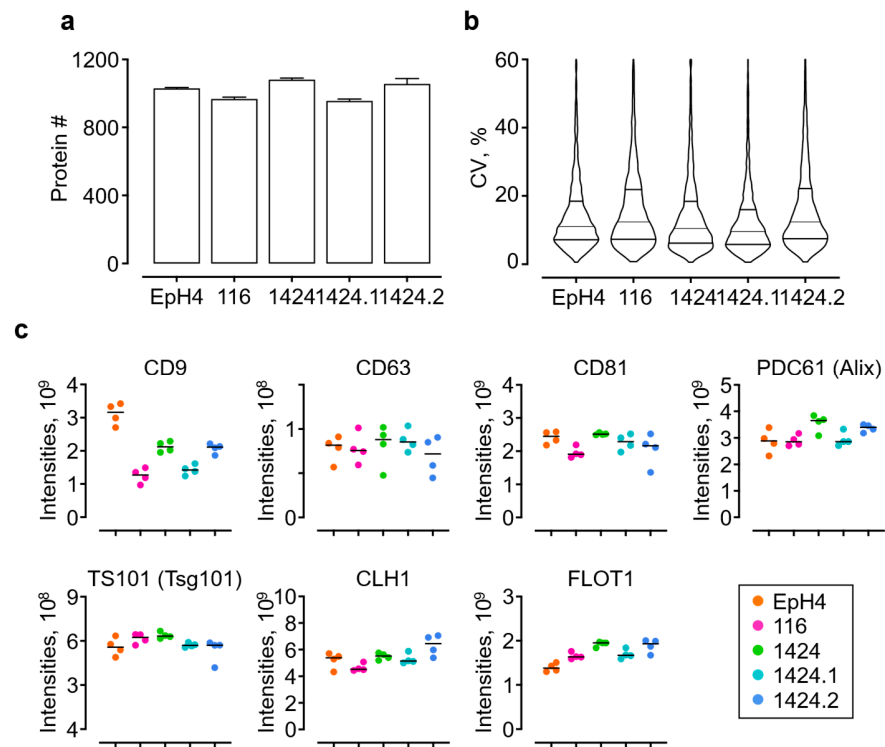

**Supplementary Figure S2.** Proteomics characterization of the exosomes isolated in each BC cell line. (a) the number of proteins identified; (b) Intra-group coefficient of variation (CV) of proteins; (c) MS intensities of seven canonical exosome markers.

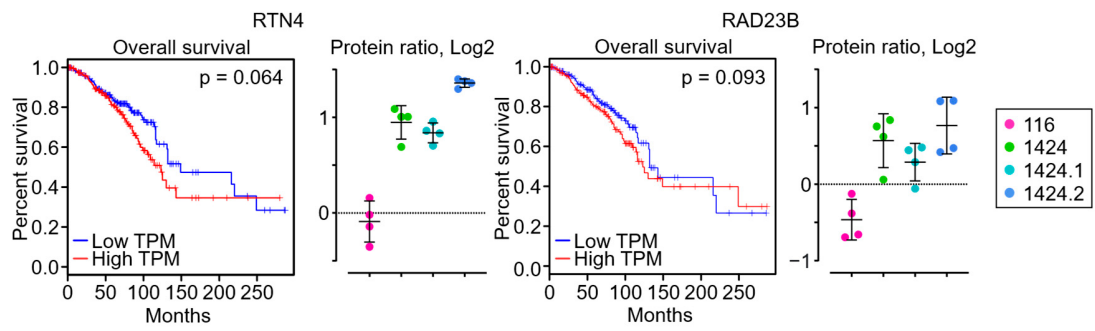

**Supplementary Figure S3.** Survival plots and corresponding protein exosome abundances of reticulon 4 (RTN4) and UV excision repair protein RAD23 homolog (RAD23B).

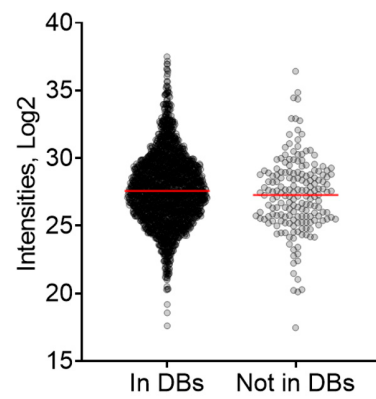

**Supplementary Figure S4.** MS intensities of proteins archived and not archived in the two EV databases (*i.e.*, Vesiclepedia and ExoCarta).

**Table S1.** List of proteins quantified and MS quantitative values in each sample.

**Table S2.** List of 94 quantified proteins among the TOP100 proteins in ExoCarta.

**Table S3.** List of protein IDs associated with BC and metastasis identified by DisGeNet.

**Table S4.** List of proteins with significant changes among the five cell lines (i.e., altered proteins).

**Table S5.** TOP20 altered proteins with the highest fold changes in each set of tumor/control comparison.

**Table S6.** List of altered proteins enriched in the DisGeNet terms of BC and metastasis.

**Table S7.** List of metastasis-specific altered proteins.

**Table S8.** TOP20 altered proteins with the highest fold changes in each set of metastatic/non-metastatic comparison.

**\*\*All Supplementary Tables are provided as separate Excel files.**
