# Supplementary material for: Comparative Proteomics Analysis of Exosomes Identifies Key Pathways and Protein Markers Related to Breast Cancer Metastasis
Source: Int J Mol Sci. 2023 Feb 17;24(4):4033. doi: 10.3390/ijms24044033 (PMC9967130; doi:10.3390/ijms24044033)
Supplement: Supplementary file 1 [file ijms-24-04033-s001.zip › Table S1 Quantification results.xlsx]

## Sheet: Table S1
Table S1	List of proteins quantified and MS quantitative values in each sample.
ProteinAC	ProteinID	Protein Name	Gene Name(s)	Untransformed MS intensities																				Log2 MS intensities
				116_1	116_2	116_3	116_4	Eph4_1	Eph4_2	Eph4_3	Eph4_4	1424_1	1424_2	1424_3	1424_4	1424.1_1	1424.1_2	1424.1_3	1424.1_4	1424.2_1	1424.2_2	1424.2_3	1424.2_4	116_1	116_2	116_3	116_4	Eph4_1	Eph4_2	Eph4_3	Eph4_4	1424_1	1424_2	1424_3	1424_4	1424.1_1	1424.1_2	1424.1_3	1424.1_4	1424.2_1	1424.2_2	1424.2_3	1424.2_4
P40240	CD9_MOUSE	CD9 antigen OS=Mus musculus GN=Cd9 PE=1 SV=2	Cd9	1.1915e+09	1.49014e+09	9.69498e+08	1.35339e+09	3.42269e+09	2.69755e+09	3.3291e+09	2.98968e+09	2.0244e+09	2.28507e+09	2.2162e+09	1.94513e+09	1.61422e+09	1.37614e+09	1.45797e+09	1.23735e+09	2.21169e+09	1.85874e+09	2.12623e+09	2.09211e+09	30.1501	30.4728	29.8527	30.3339	31.6725	31.329	31.6325	31.4773	30.9148	31.0896	31.0454	30.8572	30.5882	30.358	30.4413	30.2046	31.0425	30.7917	30.9856	30.9623
P63017	HSP7C_MOUSE	Heat shock cognate 71 kDa protein OS=Mus musculus GN=Hspa8 PE=1 SV=1	Hspa8 Hsc70 Hsc73	1.0646e+10	1.04305e+10	1.00965e+10	1.08036e+10	1.37614e+10	1.34811e+10	1.35225e+10	1.33374e+10	1.46156e+10	1.47373e+10	1.46277e+10	1.3778e+10	1.34931e+10	1.27193e+10	1.28939e+10	1.19016e+10	1.50351e+10	1.23409e+10	1.53651e+10	1.41435e+10	33.3096	33.2801	33.2331	33.3308	33.6799	33.6502	33.6546	33.6348	33.7668	33.7787	33.768	33.6816	33.6515	33.5663	33.586	33.4704	33.8076	33.5227	33.8389	33.7194
Q9WU78	PDC6I_MOUSE	Programmed cell death 6-interacting protein OS=Mus musculus GN=Pdcd6ip PE=1 SV=3	Pdcd6ip Aip1 Alix	2.79295e+09	3.39433e+09	2.319e+09	2.97617e+09	3.1737e+09	2.7015e+09	2.94018e+09	2.7648e+09	3.69294e+09	3.83894e+09	3.61934e+09	3.07924e+09	3.32509e+09	2.85939e+09	2.85816e+09	2.70805e+09	3.3317e+09	3.17935e+09	3.4649e+09	3.49867e+09	31.3791	31.6605	31.1109	31.4708	31.5635	31.3311	31.4533	31.3645	31.7821	31.8381	31.7531	31.5199	31.6307	31.4131	31.4124	31.3346	31.6336	31.5661	31.6902	31.7042
P16858	G3P_MOUSE	Glyceraldehyde-3-phosphate dehydrogenase OS=Mus musculus GN=Gapdh PE=1 SV=2	Gapdh Gapd	1.51949e+10	1.48725e+10	1.5132e+10	1.52966e+10	1.59736e+10	1.83046e+10	1.60662e+10	1.51559e+10	1.76112e+10	1.83837e+10	1.81998e+10	1.68235e+10	1.78201e+10	1.81503e+10	1.84984e+10	1.65981e+10	1.83883e+10	1.52759e+10	1.62863e+10	1.67916e+10	33.8229	33.7919	33.8169	33.8325	33.895	34.0915	33.9033	33.8192	34.0358	34.0977	34.0832	33.9698	34.0528	34.0793	34.1067	33.9503	34.0981	33.8305	33.9229	33.967
P60710	ACTB_MOUSE	Actin, cytoplasmic 1 OS=Mus musculus GN=Actb PE=1 SV=1	Actb	1.05191e+10	1.13266e+10	1.08481e+10	1.12106e+10	9.73273e+09	1.1166e+10	1.1538e+10	1.10119e+10	1.17905e+10	1.31185e+10	1.1574e+10	1.13518e+10	1.1234e+10	1.0227e+10	1.17881e+10	9.59727e+09	1.2656e+10	1.19857e+10	1.26583e+10	1.29149e+10	33.2923	33.399	33.3367	33.3841	33.1802	33.3784	33.4257	33.3583	33.4569	33.6109	33.4302	33.4022	33.3871	33.2517	33.4566	33.16	33.5591	33.4806	33.5594	33.5883
P07356	ANXA2_MOUSE	Annexin A2 OS=Mus musculus GN=Anxa2 PE=1 SV=2	Anxa2 Anx2 Cal1h	4.13988e+08	4.6192e+08	2.56637e+08	3.34975e+08	5.51534e+08	5.04363e+08	5.41652e+08	6.14608e+08	4.84482e+08	5.42833e+08	4.60202e+08	4.63367e+08	4.64188e+08	4.30242e+08	4.14192e+08	3.53679e+08	8.45063e+08	8.36005e+08	9.55158e+08	8.79785e+08	28.625	28.7831	27.9352	28.3195	29.0389	28.9099	29.0128	29.1951	28.8519	29.0159	28.7777	28.7876	28.7901	28.6806	28.6257	28.3979	29.6545	29.6389	29.8312	29.7126
P41731	CD63_MOUSE	CD63 antigen OS=Mus musculus GN=Cd63 PE=1 SV=2	Cd63	9.11428e+07	5.69429e+07	8.39671e+07	7.90888e+07	1.01181e+08	5.93241e+07	7.7041e+07	7.4394e+07	8.29293e+07	4.75948e+07	9.3031e+07	1.01767e+08	1.03571e+08	8.23283e+07	7.36019e+07	8.82591e+07	8.49793e+07	5.87554e+07	9.05228e+07	4.47491e+07	26.4416	25.763	26.3233	26.237	26.5924	25.8221	26.1991	26.1487	26.3054	25.5043	26.4712	26.6007	26.6261	26.2949	26.1332	26.3952	26.3406	25.8082	26.4318	25.4154
O08992	SDCB1_MOUSE	Syntenin-1 OS=Mus musculus GN=Sdcbp PE=2 SV=1	Sdcbp	2.78466e+09	2.56607e+09	2.79223e+09	2.80739e+09	3.5791e+09	3.52625e+09	3.55816e+09	3.32174e+09	3.73832e+09	3.90912e+09	3.93869e+09	3.50134e+09	3.26948e+09	3.13111e+09	3.29331e+09	2.88941e+09	3.20407e+09	2.89032e+09	3.29484e+09	3.10018e+09	31.3749	31.2569	31.3788	31.3866	31.737	31.7155	31.7285	31.6293	31.7997	31.8642	31.8751	31.7053	31.6064	31.544	31.6169	31.4281	31.5773	31.4286	31.6176	31.5297
P17182	ENOA_MOUSE	Alpha-enolase OS=Mus musculus GN=Eno1 PE=1 SV=3	Eno1 Eno-1	6.71376e+09	6.70872e+09	7.15725e+09	6.666e+09	6.67886e+09	7.5023e+09	6.46511e+09	6.88552e+09	7.42351e+09	7.57498e+09	6.93649e+09	7.29213e+09	7.46809e+09	7.33447e+09	7.13758e+09	7.19301e+09	7.48147e+09	6.46326e+09	6.7045e+09	7.12916e+09	32.6445	32.6434	32.7368	32.6342	32.637	32.8047	32.59	32.6809	32.7895	32.8186	32.6916	32.7637	32.7981	32.772	32.7328	32.7439	32.8007	32.5896	32.6425	32.7311
P07901	HS90A_MOUSE	Heat shock protein HSP 90-alpha OS=Mus musculus GN=Hsp90aa1 PE=1 SV=4	Hsp90aa1 Hsp86 Hsp86-1 Hspca	8.73082e+09	8.80366e+09	9.06141e+09	8.73229e+09	7.65857e+09	8.54666e+09	8.32609e+09	8.34416e+09	9.28427e+09	8.71738e+09	8.53844e+09	8.79291e+09	8.62841e+09	8.40837e+09	8.71253e+09	8.58122e+09	7.93446e+09	7.77422e+09	8.1442e+09	8.28109e+09	33.0235	33.0355	33.0771	33.0237	32.8344	32.9927	32.955	32.9581	33.1121	33.0212	32.9913	33.0337	33.0064	32.9692	33.0204	32.9985	32.8855	32.8561	32.9231	32.9472
Q61187	TS101_MOUSE	Tumor susceptibility gene 101 protein OS=Mus musculus GN=Tsg101 PE=1 SV=2	Tsg101	6.34052e+08	4.88607e+08	5.39106e+08	5.7686e+08	6.4405e+08	6.0497e+08	5.70667e+08	6.42865e+08	6.29418e+08	6.35698e+08	6.16131e+08	6.673e+08	5.89546e+08	5.66427e+08	5.7352e+08	5.56083e+08	5.6959e+08	4.19013e+08	5.8685e+08	5.71311e+08	29.24	28.8641	29.006	29.1036	29.2626	29.1723	29.0881	29.2599	29.2294	29.2438	29.1987	29.3138	29.135	29.0773	29.0953	29.0507	29.0853	28.6424	29.1284	29.0897
P52480	KPYM_MOUSE	Pyruvate kinase isozymes M1/M2 OS=Mus musculus GN=Pkm PE=1 SV=4	Pkm Pk3 Pkm2 Pykm	7.20996e+09	6.8957e+09	7.2122e+09	7.37923e+09	6.57437e+09	6.73177e+09	6.69748e+09	6.3946e+09	7.08269e+09	7.14247e+09	6.86013e+09	6.88989e+09	7.65906e+09	7.60656e+09	7.6156e+09	7.3806e+09	7.9438e+09	7.2706e+09	7.85338e+09	7.89754e+09	32.7473	32.683	32.7478	32.7808	32.6142	32.6483	32.641	32.5742	32.7217	32.7338	32.6756	32.6818	32.8345	32.8246	32.8263	32.7811	32.8872	32.7594	32.8707	32.8788
P06151	LDHA_MOUSE	L-lactate dehydrogenase A chain OS=Mus musculus GN=Ldha PE=1 SV=3	Ldha Ldh-1 Ldh1	3.25434e+09	3.91431e+09	3.53549e+09	3.69085e+09	3.34761e+09	3.62274e+09	3.49224e+09	3.40918e+09	3.6902e+09	3.84593e+09	3.9231e+09	3.65265e+09	3.87531e+09	3.86707e+09	3.94846e+09	3.76525e+09	3.74163e+09	4.25474e+09	3.82784e+09	4.24629e+09	31.5997	31.8661	31.7193	31.7813	31.6405	31.7544	31.7015	31.6668	31.7811	31.8407	31.8693	31.7663	31.8517	31.8486	31.8786	31.8101	31.801	31.9864	31.8339	31.9836
P10126	EF1A1_MOUSE	Elongation factor 1-alpha 1 OS=Mus musculus GN=Eef1a1 PE=1 SV=3	Eef1a1 Eef1a	5.74931e+09	6.56174e+09	5.33565e+09	5.86897e+09	7.45091e+09	6.38569e+09	6.86394e+09	6.94956e+09	6.93898e+09	7.08635e+09	6.79622e+09	6.20984e+09	7.04465e+09	6.22479e+09	6.43038e+09	5.94505e+09	8.72828e+09	7.67789e+09	8.80895e+09	8.01794e+09	32.4207	32.6114	32.313	32.4505	32.7948	32.5722	32.6764	32.6943	32.6921	32.7224	32.6621	32.5319	32.7139	32.5354	32.5823	32.469	33.023	32.8381	33.0363	32.9006
P63101	1433Z_MOUSE	14-3-3 protein zeta/delta OS=Mus musculus GN=Ywhaz PE=1 SV=1	Ywhaz	3.25056e+08	3.07876e+08	2.71546e+08	2.94042e+08	3.75937e+08	3.41064e+08	3.4497e+08	3.72336e+08	3.25919e+08	3.57075e+08	3.19892e+08	3.60611e+08	3.19355e+08	3.10691e+08	2.87181e+08	2.88625e+08	3.76197e+08	3.36872e+08	3.33131e+08	3.8318e+08	28.2761	28.1978	28.0166	28.1314	28.4859	28.3455	28.3619	28.472	28.2799	28.4117	28.253	28.4259	28.2506	28.2109	28.0974	28.1046	28.4869	28.3276	28.3115	28.5134
P09411	PGK1_MOUSE	Phosphoglycerate kinase 1 OS=Mus musculus GN=Pgk1 PE=1 SV=4	Pgk1 Pgk-1	3.55179e+09	2.57028e+09	3.40414e+09	3.35973e+09	2.8558e+09	3.03743e+09	2.84583e+09	2.78794e+09	3.43252e+09	2.78844e+09	3.15939e+09	3.47221e+09	3.60596e+09	3.71216e+09	3.77042e+09	3.5188e+09	3.30076e+09	2.38563e+09	2.98391e+09	2.67588e+09	31.7259	31.2593	31.6646	31.6457	31.4112	31.5002	31.4062	31.3766	31.6766	31.3768	31.557	31.6932	31.7477	31.7896	31.8121	31.7124	31.6202	31.1517	31.4746	31.3174
P58252	EF2_MOUSE	Elongation factor 2 OS=Mus musculus GN=Eef2 PE=1 SV=2	Eef2	2.28977e+10	3.44528e+10	2.50165e+10	2.98157e+10	2.97867e+10	2.51244e+10	2.64631e+10	2.625e+10	2.43093e+10	3.0091e+10	3.10156e+10	2.44151e+10	2.41667e+10	2.34436e+10	2.41242e+10	2.51634e+10	2.63401e+10	3.9184e+10	3.1069e+10	3.29859e+10	34.4145	35.0039	34.5422	34.7954	34.794	34.5484	34.6233	34.6116	34.5008	34.8086	34.8523	34.5071	34.4923	34.4485	34.4898	34.5506	34.6165	35.1895	34.8548	34.9411
P05064	ALDOA_MOUSE	Fructose-bisphosphate aldolase A OS=Mus musculus GN=Aldoa PE=1 SV=2	Aldoa Aldo1	3.76312e+08	4.53777e+08	3.57416e+08	3.99513e+08	4.33642e+08	3.91902e+08	4.50959e+08	4.53731e+08	3.44223e+08	3.94975e+08	3.5276e+08	3.5554e+08	3.73979e+08	3.63779e+08	3.41227e+08	3.70694e+08	4.06348e+08	4.57305e+08	4.13348e+08	4.38797e+08	28.4874	28.7574	28.413	28.5737	28.6919	28.5459	28.7484	28.7573	28.3588	28.5572	28.3941	28.4054	28.4784	28.4385	28.3462	28.4657	28.5981	28.7686	28.6228	28.709
P11499	HS90B_MOUSE	Heat shock protein HSP 90-beta OS=Mus musculus GN=Hsp90ab1 PE=1 SV=3	Hsp90ab1 Hsp84 Hsp84-1 Hspcb	6.1276e+09	6.58295e+09	6.22029e+09	6.53068e+09	5.45384e+09	5.91211e+09	6.30847e+09	5.98317e+09	6.55123e+09	6.84995e+09	6.57982e+09	6.21162e+09	5.45941e+09	5.77683e+09	6.72951e+09	5.91595e+09	5.7847e+09	6.58111e+09	6.3573e+09	6.67528e+09	32.5127	32.6161	32.5343	32.6046	32.3446	32.461	32.5546	32.4783	32.6091	32.6734	32.6154	32.5323	32.3461	32.4276	32.6479	32.462	32.4296	32.6157	32.5658	32.6362
P48036	ANXA5_MOUSE	Annexin A5 OS=Mus musculus GN=Anxa5 PE=1 SV=1	Anxa5 Anx5	5.22937e+08	5.59525e+08	4.54256e+08	5.31904e+08	5.22876e+08	4.88159e+08	5.63059e+08	4.74178e+08	6.70894e+08	7.43084e+08	7.30822e+08	6.64563e+08	6.11053e+08	6.49589e+08	7.47624e+08	5.52731e+08	9.2049e+08	9.21673e+08	1.04212e+09	9.70824e+08	28.9621	29.0596	28.7589	28.9866	28.9619	28.8628	29.0687	28.8209	29.3215	29.469	29.4449	29.3078	29.1867	29.275	29.4777	29.042	29.7778	29.7797	29.9569	29.8546
P19096	FAS_MOUSE	Fatty acid synthase OS=Mus musculus GN=Fasn PE=1 SV=2	Fasn	2.03619e+09	1.93523e+09	1.99842e+09	1.92035e+09	1.88549e+09	1.97754e+09	1.9434e+09	1.90852e+09	1.98126e+09	1.99608e+09	1.96733e+09	1.89126e+09	2.19855e+09	2.04407e+09	2.15721e+09	2.17565e+09	1.99691e+09	2.11777e+09	1.99204e+09	2.03472e+09	30.9232	30.8499	30.8962	30.8387	30.8123	30.8811	30.8559	30.8298	30.8838	30.8945	30.8736	30.8167	31.0339	30.9288	31.0065	31.0188	30.8951	30.9799	30.8916	30.9222
P62259	1433E_MOUSE	14-3-3 protein epsilon OS=Mus musculus GN=Ywhae PE=1 SV=1	Ywhae	1.02771e+09	1.00618e+09	9.72648e+08	1.088e+09	1.00137e+09	9.88118e+08	1.07146e+09	9.56517e+08	1.02068e+09	9.66777e+08	1.07532e+09	1.01224e+09	8.58538e+08	9.35059e+08	9.83464e+08	9.45251e+08	9.40881e+08	9.35149e+08	1.02067e+09	1.02621e+09	29.9368	29.9062	29.8573	30.019	29.8993	29.8801	29.9969	29.8332	29.9269	29.8486	30.0021	29.9149	29.6773	29.8005	29.8733	29.8161	29.8094	29.8006	29.9269	29.9347
Q68FD5	CLH1_MOUSE	Clathrin heavy chain 1 OS=Mus musculus GN=Cltc PE=1 SV=3	Cltc	5.48987e+09	5.71158e+09	4.32348e+09	5.29291e+09	5.07163e+09	4.43581e+09	4.48729e+09	4.56042e+09	5.75113e+09	5.39702e+09	5.62566e+09	5.19242e+09	5.88162e+09	5.1179e+09	5.15723e+09	4.99956e+09	7.05218e+09	5.38778e+09	6.92173e+09	5.9785e+09	32.3541	32.4112	32.0095	32.3014	32.2398	32.0466	32.0632	32.0865	32.4212	32.3295	32.3894	32.2738	32.4536	32.2529	32.2639	32.2192	32.7154	32.327	32.6885	32.4771
P35762	CD81_MOUSE	CD81 antigen OS=Mus musculus GN=Cd81 PE=1 SV=2	Cd81 Tapa1	2.55607e+09	2.18325e+09	2.33067e+09	2.5751e+09	2.18757e+09	1.88922e+09	1.80721e+09	1.92048e+09	2.49353e+09	2.52288e+09	2.56468e+09	2.49875e+09	2.52188e+09	2.40183e+09	2.17049e+09	1.97045e+09	2.51741e+09	1.36308e+09	2.21032e+09	2.10619e+09	31.2513	31.0238	31.1181	31.262	31.0267	30.8151	30.7511	30.8388	31.2155	31.2324	31.2561	31.2186	31.2319	31.1615	31.0154	30.8759	31.2293	30.3442	31.0416	30.972
P07724	ALBU_MOUSE	Serum albumin OS=Mus musculus GN=Alb PE=1 SV=3	Alb Alb-1 Alb1	7.56056e+10	8.75156e+10	7.809e+10	8.82477e+10	8.63101e+10	7.49575e+10	5.94686e+10	7.11573e+10	7.37972e+10	7.83673e+10	8.16579e+10	7.94172e+10	7.34354e+10	7.90924e+10	6.49503e+10	8.60987e+10	9.39302e+10	8.75735e+10	9.86614e+10	9.34377e+10	36.1378	36.3488	36.1844	36.3608	36.3288	36.1254	35.7914	36.0503	36.1028	36.1895	36.2489	36.2087	36.0958	36.2028	35.9186	36.3253	36.4509	36.3498	36.5218	36.4433
Q01853	TERA_MOUSE	Transitional endoplasmic reticulum ATPase OS=Mus musculus GN=Vcp PE=1 SV=4	Vcp	1.02728e+09	7.55354e+08	8.94543e+08	8.9928e+08	7.43507e+08	5.99386e+08	6.24168e+08	6.952e+08	1.00378e+09	9.24585e+08	1.0883e+09	9.87322e+08	9.27012e+08	9.68831e+08	9.95183e+08	9.37566e+08	1.09928e+09	1.23528e+09	1.45503e+09	9.45769e+08	29.9362	29.4926	29.7366	29.7442	29.4698	29.1589	29.2174	29.3729	29.9028	29.7842	30.0194	29.8789	29.788	29.8517	29.8904	29.8043	30.0339	30.2022	30.4384	29.8169
P17751	TPIS_MOUSE	Triosephosphate isomerase OS=Mus musculus GN=Tpi1 PE=1 SV=4	Tpi1 Tpi	1.64059e+09	1.18499e+09	2.20715e+09	1.99579e+09	2.02797e+09	1.79795e+09	2.41059e+09	1.97462e+09	1.7557e+09	1.40397e+09	2.3425e+09	1.69522e+09	1.73451e+09	2.24729e+09	2.50355e+09	1.68453e+09	1.55525e+09	1.37017e+09	2.11649e+09	1.19209e+09	30.6116	30.1422	31.0395	30.8943	30.9174	30.7437	31.1667	30.8789	30.7094	30.3869	31.1254	30.6588	30.6919	31.0655	31.2213	30.6497	30.5345	30.3517	30.979	30.1508
P17742	PPIA_MOUSE	Peptidyl-prolyl cis-trans isomerase A OS=Mus musculus GN=Ppia PE=1 SV=2	Ppia	7.67557e+09	7.21314e+09	7.44743e+09	8.10348e+09	8.5796e+09	8.67237e+09	8.1599e+09	8.18651e+09	8.55772e+09	9.37243e+09	8.82993e+09	8.00599e+09	7.54376e+09	7.724e+09	7.73116e+09	7.42602e+09	7.93164e+09	7.46342e+09	9.11837e+09	8.57105e+09	32.8376	32.748	32.7941	32.9159	32.9983	33.0138	32.9259	32.9306	32.9946	33.1258	33.0398	32.8984	32.8126	32.8467	32.848	32.7899	32.885	32.7972	33.0861	32.9968
P26041	MOES_MOUSE	Moesin OS=Mus musculus GN=Msn PE=1 SV=3	Msn	6.78596e+08	8.48532e+08	5.36144e+08	6.83364e+08	9.15942e+08	7.89014e+08	9.45596e+08	8.91655e+08	9.44367e+08	1.13366e+09	9.93036e+08	9.59265e+08	7.11967e+08	6.92326e+08	7.46545e+08	6.58255e+08	1.07017e+09	1.13784e+09	1.20171e+09	1.27404e+09	29.338	29.6604	28.998	29.3481	29.7707	29.5555	29.8166	29.7319	29.8148	30.0783	29.8873	29.8374	29.4072	29.3669	29.4757	29.2941	29.9952	30.0837	30.1624	30.2468
P18760	COF1_MOUSE	Cofilin-1 OS=Mus musculus GN=Cfl1 PE=1 SV=3	Cfl1	5.70418e+08	7.91139e+08	4.96545e+08	6.7739e+08	8.54009e+08	6.85632e+08	7.32006e+08	7.25147e+08	7.33734e+08	9.14491e+08	6.90312e+08	6.30763e+08	5.71307e+08	5.5996e+08	5.70132e+08	6.04719e+08	7.38106e+08	6.83212e+08	7.07705e+08	6.93248e+08	29.0874	29.5594	28.8873	29.3354	29.6697	29.3529	29.4473	29.4337	29.4507	29.7684	29.3627	29.2325	29.0897	29.0607	29.0867	29.1717	29.4593	29.3478	29.3986	29.3688
P35700	PRDX1_MOUSE	Peroxiredoxin-1 OS=Mus musculus GN=Prdx1 PE=1 SV=1	Prdx1 Msp23 Paga Tdpx2	4.46393e+09	3.0679e+09	3.56672e+09	2.92732e+09	2.64502e+09	3.21116e+09	3.79409e+09	2.86441e+09	3.85433e+09	4.03314e+09	3.64311e+09	4.56727e+09	4.84641e+09	4.1816e+09	4.82846e+09	3.47519e+09	4.23496e+09	3.83824e+09	4.4131e+09	4.17011e+09	32.0557	31.5146	31.732	31.4469	31.3006	31.5804	31.8211	31.4156	31.8438	31.9093	31.7625	32.0887	32.1743	31.9614	32.1689	31.6944	31.9797	31.8378	32.0391	31.9574
P62962	PROF1_MOUSE	Profilin-1 OS=Mus musculus GN=Pfn1 PE=1 SV=2	Pfn1	7.00756e+09	6.09933e+09	7.27272e+09	6.89273e+09	6.11451e+09	7.11358e+09	6.45676e+09	6.23219e+09	7.71307e+09	7.18678e+09	7.59105e+09	7.5575e+09	8.05053e+09	7.10131e+09	7.82581e+09	6.80895e+09	7.69707e+09	6.49408e+09	7.05431e+09	6.72498e+09	32.7063	32.506	32.7598	32.6824	32.5096	32.7279	32.5882	32.5371	32.8447	32.7427	32.8217	32.8153	32.9064	32.7254	32.8656	32.6648	32.8417	32.5965	32.7159	32.6469
Q99JI6	RAP1B_MOUSE	Ras-related protein Rap-1b OS=Mus musculus GN=Rap1b PE=2 SV=2	Rap1b	7.37721e+08	8.70257e+08	7.39935e+08	7.51942e+08	8.78488e+08	8.98587e+08	8.62444e+08	9.44507e+08	9.7308e+08	1.02268e+09	8.53786e+08	9.1202e+08	8.53751e+08	8.17382e+08	7.78067e+08	8.22203e+08	9.59506e+08	8.94032e+08	8.40003e+08	1.08302e+09	29.4585	29.6969	29.4628	29.486	29.7104	29.7431	29.6839	29.815	29.858	29.9297	29.6693	29.7645	29.6692	29.6064	29.5353	29.6149	29.8377	29.7358	29.6458	30.0124
P09055	ITB1_MOUSE	Integrin beta-1 OS=Mus musculus GN=Itgb1 PE=1 SV=1	Itgb1	3.65495e+09	4.62389e+09	2.97092e+09	3.61332e+09	5.64545e+09	5.2305e+09	5.76977e+09	6.04963e+09	5.26921e+09	6.42275e+09	5.43507e+09	5.64101e+09	4.71776e+09	4.46442e+09	4.13296e+09	4.82385e+09	6.67129e+09	7.06907e+09	6.68553e+09	6.81138e+09	31.7672	32.1065	31.4683	31.7507	32.3944	32.2843	32.4259	32.4942	32.2949	32.5805	32.3397	32.3933	32.1355	32.0558	31.9445	32.1675	32.6353	32.7189	32.6384	32.6653
P20029	GRP78_MOUSE	78 kDa glucose-regulated protein OS=Mus musculus GN=Hspa5 PE=1 SV=3	Hspa5 Grp78	1.29475e+09	1.19362e+09	1.30675e+09	1.2688e+09	1.15343e+09	1.31927e+09	1.2274e+09	1.21571e+09	1.32173e+09	1.22619e+09	1.25008e+09	1.34768e+09	1.2905e+09	1.39812e+09	1.36584e+09	1.34348e+09	1.31246e+09	1.26115e+09	1.34211e+09	1.29852e+09	30.27	30.1527	30.2833	30.2408	30.1033	30.2971	30.193	30.1791	30.2998	30.1915	30.2194	30.3278	30.2653	30.3808	30.3471	30.3233	30.2896	30.2321	30.3219	30.2742
P10852	4F2_MOUSE	4F2 cell-surface antigen heavy chain OS=Mus musculus GN=Slc3a2 PE=1 SV=1	Slc3a2 Mdu1	7.18239e+08	7.44645e+08	5.88419e+08	7.21378e+08	1.03339e+09	9.09344e+08	9.59765e+08	1.01676e+09	1.02532e+09	1.17167e+09	1.08261e+09	1.10758e+09	8.77081e+08	7.48338e+08	7.83537e+08	7.01678e+08	1.16471e+09	9.43798e+08	1.11575e+09	1.07381e+09	29.4199	29.472	29.1323	29.4262	29.9447	29.7603	29.8381	29.9213	29.9334	30.1259	30.0119	30.0448	29.7081	29.4791	29.5454	29.3862	30.1173	29.8139	30.0554	30.0001
P62806	H4_MOUSE	Histone H4 OS=Mus musculus GN=Hist1h4a PE=1 SV=2	H4c1 Hist1h4a; H4c2 H4-53 Hist1h4b; H4c3 H4-12 Hist1h4c; H4c4 Hist1h4d; H4c6 Hist1h4f; H4c8 Hist1h4h; H4c9 Hist1h4i; H4c11 Hist1h4j; H4c12 Hist1h4k; Hist1h4m; H4c14 Hist2h4 Hist2h4a; H4f16 Hist4h4	1.41738e+10	1.72376e+10	8.9275e+09	1.50707e+10	2.41082e+10	1.84983e+10	2.27183e+10	2.68699e+10	2.59043e+10	3.3724e+10	2.53349e+10	2.4574e+10	1.76342e+10	2.56383e+10	1.28678e+10	2.23577e+10	8.54109e+10	7.02764e+10	7.32136e+10	6.77708e+10	33.7225	34.0048	33.0556	33.811	34.4888	34.1067	34.4031	34.6453	34.5925	34.9731	34.5604	34.5164	34.0377	34.5776	33.583	34.3801	36.3137	36.0323	36.0914	35.9799
P62880	GBB2_MOUSE	Guanine nucleotide-binding protein G(I)/G(S)/G(T) subunit beta-2 OS=Mus musculus GN=Gnb2 PE=1 SV=3	Gnb2	1.36815e+08	1.89111e+08	1.08065e+08	1.70563e+08	2.02665e+08	1.81981e+08	2.11222e+08	1.71281e+08	1.59116e+08	1.79491e+08	1.64002e+08	1.44456e+08	1.34506e+08	1.27295e+08	1.42747e+08	1.22398e+08	1.73461e+08	1.70068e+08	1.67564e+08	1.83178e+08	27.0277	27.4947	26.6873	27.3457	27.5945	27.4392	27.6542	27.3518	27.2455	27.4193	27.2891	27.1061	27.0031	26.9236	27.0889	26.867	27.37	27.3415	27.3201	27.4487
Q8VDN2	AT1A1_MOUSE	Sodium/potassium-transporting ATPase subunit alpha-1 OS=Mus musculus GN=Atp1a1 PE=1 SV=1	Atp1a1	1.37028e+11	1.28428e+11	1.35689e+11	1.34074e+11	1.03632e+11	1.24542e+11	1.10047e+11	9.6896e+10	1.53092e+11	1.53711e+11	1.43104e+11	1.29639e+11	1.60134e+11	1.37564e+11	1.38411e+11	1.27089e+11	1.47347e+11	1.01561e+11	1.25478e+11	1.41879e+11	36.9957	36.9022	36.9815	36.9642	36.5927	36.8578	36.6793	36.4957	37.1556	37.1614	37.0583	36.9157	37.2205	37.0013	37.0102	36.887	37.1004	36.5636	36.8686	37.0459
P68254	1433T_MOUSE	14-3-3 protein theta OS=Mus musculus GN=Ywhaq PE=1 SV=1	Ywhaq	1.93865e+08	2.12029e+08	1.8159e+08	2.11695e+08	2.38227e+08	2.1949e+08	2.43361e+08	1.88241e+08	2.29293e+08	2.18068e+08	2.45012e+08	1.94935e+08	2.14411e+08	2.07968e+08	2.288e+08	2.1827e+08	2.30556e+08	2.58095e+08	2.67416e+08	2.48321e+08	27.5305	27.6597	27.4361	27.6574	27.8278	27.7096	27.8585	27.488	27.7726	27.7002	27.8683	27.5384	27.6758	27.6318	27.7695	27.7015	27.7805	27.9433	27.9945	27.8876
O08917	FLOT1_MOUSE	Flotillin-1 OS=Mus musculus GN=Flot1 PE=1 SV=1	Flot1	1.3315e+09	1.42949e+09	1.29939e+09	1.51173e+09	1.75522e+09	1.62559e+09	1.58872e+09	1.63802e+09	1.94586e+09	1.95226e+09	1.97398e+09	1.84224e+09	1.83519e+09	1.66196e+09	1.68185e+09	1.58776e+09	1.98591e+09	1.6733e+09	1.87363e+09	1.99711e+09	30.3104	30.4129	30.2752	30.4936	30.709	30.5983	30.5652	30.6093	30.8578	30.8625	30.8785	30.7788	30.7733	30.6302	30.6474	30.5643	30.8872	30.64	30.8032	30.8953
Q8BTM8	FLNA_MOUSE	Filamin-A OS=Mus musculus GN=Flna PE=1 SV=5	Flna Fln Fln1	8.49485e+09	8.47101e+09	8.81178e+09	8.50312e+09	8.13018e+09	8.36378e+09	8.55031e+09	7.91288e+09	8.65273e+09	8.63254e+09	8.75648e+09	8.89096e+09	9.06778e+09	8.90421e+09	9.26161e+09	8.85856e+09	8.45932e+09	8.44917e+09	8.49021e+09	8.81066e+09	32.9839	32.9799	33.0368	32.9853	32.9206	32.9615	32.9933	32.8816	33.0105	33.0071	33.0277	33.0497	33.0781	33.0518	33.1086	33.0444	32.9779	32.9762	32.9832	33.0366
Q9Z1Q5	CLIC1_MOUSE	Chloride intracellular channel protein 1 OS=Mus musculus GN=Clic1 PE=1 SV=3	Clic1	3.74405e+09	4.1652e+09	3.36209e+09	3.92937e+09	3.27416e+09	3.74185e+09	4.14006e+09	3.42033e+09	4.71116e+09	3.9691e+09	3.76858e+09	3.58083e+09	3.91682e+09	3.71701e+09	3.67382e+09	3.73184e+09	3.65864e+09	4.21285e+09	3.35179e+09	4.9007e+09	31.802	31.9557	31.6467	31.8717	31.6085	31.8011	31.947	31.6715	32.1334	31.8862	31.8114	31.7376	31.867	31.7915	31.7746	31.7972	31.7687	31.9721	31.6423	32.1903
P60766	CDC42_MOUSE	Cell division control protein 42 homolog OS=Mus musculus GN=Cdc42 PE=1 SV=2	Cdc42	2.75561e+08	3.49496e+08	2.42765e+08	2.97995e+08	3.79795e+08	3.54399e+08	3.78407e+08	3.28454e+08	3.57325e+08	4.06886e+08	3.75126e+08	3.35867e+08	3.21061e+08	3.14484e+08	3.21078e+08	2.99926e+08	3.95235e+08	3.66954e+08	4.03558e+08	4.24834e+08	28.0378	28.3807	27.855	28.1507	28.5006	28.4008	28.4954	28.2911	28.4127	28.6	28.4828	28.3233	28.2583	28.2284	28.2583	28.16	28.5581	28.451	28.5882	28.6623
P80314	TCPB_MOUSE	T-complex protein 1 subunit beta OS=Mus musculus GN=Cct2 PE=1 SV=4	Cct2 Cctb	3.92633e+08	4.21816e+08	4.01461e+08	4.03543e+08	3.72066e+08	4.20891e+08	4.10888e+08	3.99602e+08	4.55569e+08	4.85239e+08	4.7868e+08	4.60422e+08	4.43611e+08	4.50801e+08	4.5823e+08	4.45765e+08	5.02241e+08	5.32625e+08	5.10343e+08	5.39244e+08	28.5486	28.652	28.5807	28.5881	28.471	28.6489	28.6142	28.574	28.7631	28.8541	28.8345	28.7784	28.7247	28.7479	28.7715	28.7317	28.9038	28.9885	28.9269	29.0064
Q6GQT1	A2MP_MOUSE	Alpha-2-macroglobulin-P OS=Mus musculus GN=A2mp PE=2 SV=2	A2m A2mp	1.58801e+11	1.51123e+11	1.71891e+11	1.51855e+11	1.17932e+11	1.55931e+11	1.50061e+11	1.19505e+11	1.63893e+11	1.58064e+11	1.57118e+11	1.75804e+11	1.52888e+11	1.61771e+11	1.90433e+11	1.59054e+11	1.50675e+11	1.49271e+11	1.42271e+11	1.60478e+11	37.2084	37.1369	37.3227	37.1439	36.7792	37.1821	37.1268	36.7983	37.254	37.2017	37.1931	37.3552	37.1537	37.2352	37.4705	37.2107	37.1327	37.1191	37.0499	37.2236
P61982	1433G_MOUSE	14-3-3 protein gamma OS=Mus musculus GN=Ywhag PE=1 SV=2	Ywhag	1.6195e+08	2.14969e+08	1.69314e+08	1.78471e+08	2.07012e+08	2.24073e+08	2.32337e+08	2.13127e+08	1.78575e+08	2.25839e+08	1.90515e+08	1.83654e+08	1.79163e+08	1.81882e+08	1.82486e+08	1.73451e+08	1.93666e+08	2.26598e+08	1.91916e+08	2.29466e+08	27.271	27.6796	27.3351	27.4111	27.6251	27.7394	27.7916	27.6671	27.412	27.7507	27.5053	27.4524	27.4167	27.4384	27.4432	27.37	27.529	27.7556	27.5159	27.7737
P63001	RAC1_MOUSE	Ras-related C3 botulinum toxin substrate 1 OS=Mus musculus GN=Rac1 PE=1 SV=1	Rac1	7.20045e+08	7.90204e+08	6.89772e+08	7.98212e+08	1.01834e+09	9.88392e+08	9.55946e+08	9.67706e+08	8.70075e+08	9.39629e+08	8.49697e+08	8.22254e+08	7.57378e+08	7.34655e+08	7.07349e+08	6.69994e+08	8.75129e+08	8.00488e+08	9.33473e+08	9.44047e+08	29.4235	29.5577	29.3615	29.5722	29.9236	29.8805	29.8324	29.85	29.6966	29.8075	29.6624	29.615	29.4964	29.4525	29.3978	29.3196	29.7049	29.5763	29.798	29.8143
Q07797	LG3BP_MOUSE	Galectin-3-binding protein OS=Mus musculus GN=Lgals3bp PE=1 SV=1	Lgals3bp Cycap Mama	1.71925e+08	1.5277e+08	1.56857e+08	1.41593e+08	1.13884e+08	1.2704e+08	1.15063e+08	1.17735e+08	1.59455e+08	1.35948e+08	1.27319e+08	1.61787e+08	1.4746e+08	1.66575e+08	1.47492e+08	1.63989e+08	1.55914e+08	1.26729e+08	1.37101e+08	1.47621e+08	27.3572	27.1868	27.2249	27.0772	26.763	26.9207	26.7779	26.811	27.2486	27.0185	26.9239	27.2695	27.1357	27.3116	27.1361	27.289	27.2162	26.9172	27.0307	27.1373
P08752	GNAI2_MOUSE	Guanine nucleotide-binding protein G(i) subunit alpha-2 OS=Mus musculus GN=Gnai2 PE=1 SV=5	Gnai2 Gnai-2	4.46681e+08	5.38087e+08	3.37096e+08	4.67717e+08	4.91309e+08	4.33682e+08	4.64559e+08	4.73291e+08	5.44081e+08	6.69098e+08	5.38567e+08	5.89634e+08	4.37229e+08	4.31804e+08	4.18112e+08	3.83239e+08	7.13823e+08	7.25049e+08	7.4321e+08	8.05884e+08	28.7347	29.0033	28.3286	28.8011	28.8721	28.6921	28.7913	28.8182	29.0192	29.3176	29.0046	29.1352	28.7038	28.6858	28.6393	28.5137	29.411	29.4335	29.4692	29.586
P10107	ANXA1_MOUSE	Annexin A1 OS=Mus musculus GN=Anxa1 PE=1 SV=2	Anxa1 Anx1 Lpc-1 Lpc1	2.09251e+08	2.23848e+08	1.99845e+08	2.01783e+08	2.39884e+08	2.29438e+08	2.59846e+08	3.00418e+08	3.52426e+08	3.9765e+08	3.63102e+08	3.82055e+08	2.6261e+08	2.62541e+08	2.66098e+08	2.59462e+08	4.72878e+08	4.84379e+08	5.27756e+08	5.2157e+08	27.6407	27.7379	27.5743	27.5882	27.8378	27.7735	27.9531	28.1624	28.3927	28.5669	28.4358	28.5092	27.9683	27.968	27.9874	27.9509	28.8169	28.8516	28.9753	28.9583
Q9QUI0	RHOA_MOUSE	Transforming protein RhoA OS=Mus musculus GN=Rhoa PE=1 SV=1	Rhoa Arha Arha2	2.10194e+08	2.59019e+08	2.00068e+08	2.71693e+08	3.17049e+08	2.83015e+08	3.07445e+08	3.38927e+08	2.66433e+08	2.99947e+08	2.38613e+08	2.6232e+08	2.07984e+08	2.19669e+08	1.70641e+08	2.0965e+08	2.58015e+08	2.85841e+08	2.9319e+08	3.09037e+08	27.6471	27.9485	27.5759	28.0174	28.2401	28.0763	28.1958	28.3364	27.9892	28.1601	27.8301	27.9668	27.6319	27.7108	27.3464	27.6434	27.9429	28.0906	28.1273	28.2032
P21956	MFGM_MOUSE	Lactadherin OS=Mus musculus GN=Mfge8 PE=1 SV=3	Mfge8	3.49195e+09	4.12855e+09	2.87277e+09	3.51891e+09	3.55442e+09	3.10807e+09	3.32348e+09	3.42358e+09	5.35917e+09	5.57268e+09	5.26354e+09	5.57251e+09	2.79943e+09	2.40643e+09	2.51447e+09	2.41417e+09	5.48154e+09	4.67014e+09	5.20836e+09	4.87959e+09	31.7014	31.943	31.4198	31.7125	31.727	31.5334	31.63	31.6729	32.3194	32.3757	32.2934	32.3757	31.3825	31.1643	31.2276	31.1689	32.3519	32.1208	32.2782	32.1841
Q61171	PRDX2_MOUSE	Peroxiredoxin-2 OS=Mus musculus GN=Prdx2 PE=1 SV=3	Prdx2 Tdpx1 Tpx	1.26213e+08	1.42529e+08	1.18879e+08	1.30882e+08	1.00036e+08	1.20108e+08	1.12033e+08	1.13968e+08	1.39959e+08	1.33348e+08	1.24062e+08	1.43591e+08	1.24398e+08	1.34205e+08	1.30202e+08	1.24472e+08	1.44008e+08	1.52712e+08	1.249e+08	1.48341e+08	26.9113	27.0867	26.8249	26.9637	26.5759	26.8398	26.7394	26.7641	27.0604	26.9906	26.8865	27.0974	26.8904	26.9999	26.9562	26.8912	27.1016	27.1862	26.8962	27.1443
Q61598	GDIB_MOUSE	Rab GDP dissociation inhibitor beta OS=Mus musculus GN=Gdi2 PE=1 SV=1	Gdi2 Gdi3	9.69737e+08	8.31024e+08	1.01145e+09	9.68935e+08	8.82295e+08	8.91354e+08	8.80695e+08	7.78781e+08	1.01475e+09	8.88962e+08	1.01977e+09	1.01576e+09	1.01208e+09	1.05291e+09	1.05219e+09	1.01323e+09	9.19224e+08	7.63613e+08	9.80629e+08	8.86841e+08	29.853	29.6303	29.9138	29.8518	29.7167	29.7314	29.7141	29.5366	29.9185	29.7275	29.9256	29.9199	29.9147	29.9717	29.9707	29.9163	29.7758	29.5083	29.8691	29.7241
Q9EQP2	EHD4_MOUSE	EH domain-containing protein 4 OS=Mus musculus GN=Ehd4 PE=1 SV=1	Ehd4 Past2	6.15541e+08	6.11752e+08	5.58104e+08	6.98082e+08	1.48647e+09	1.29519e+09	1.49171e+09	1.50794e+09	1.08644e+09	1.23536e+09	1.14903e+09	1.13357e+09	8.30276e+08	7.8784e+08	8.2275e+08	7.08387e+08	1.20505e+09	1.16397e+09	1.24114e+09	1.24032e+09	29.1973	29.1884	29.056	29.3788	30.4692	30.2705	30.4743	30.4899	30.017	30.2023	30.0978	30.0782	29.629	29.5533	29.6159	29.4	30.1664	30.1164	30.209	30.2081
P57780	ACTN4_MOUSE	Alpha-actinin-4 OS=Mus musculus GN=Actn4 PE=1 SV=1	Actn4	2.78594e+07	3.27953e+07	2.51052e+07	3.11984e+07	2.69422e+07	2.25665e+07	2.45447e+07	2.07592e+07	2.6668e+07	2.82254e+07	3.31649e+07	2.66869e+07	2.09413e+07	2.93275e+07	2.87098e+07	2.17783e+07	2.54176e+07	3.88045e+07	2.94991e+07	3.14956e+07	24.7317	24.967	24.5815	24.895	24.6834	24.4277	24.5489	24.3072	24.6686	24.7505	24.9832	24.6696	24.3198	24.8058	24.775	24.3764	24.5993	25.2097	24.8142	24.9086
Q9CQV8	1433B_MOUSE	14-3-3 protein beta/alpha OS=Mus musculus GN=Ywhab PE=1 SV=3	Ywhab	2.00395e+08	2.29594e+08	2.05752e+08	2.02161e+08	2.21776e+08	2.324e+08	2.29974e+08	2.30238e+08	1.98443e+08	2.11393e+08	2.04726e+08	2.26956e+08	2.27424e+08	2.19385e+08	2.24715e+08	2.00465e+08	2.26372e+08	2.20172e+08	2.20207e+08	2.37638e+08	27.5783	27.7745	27.6163	27.5909	27.7245	27.792	27.7769	27.7785	27.5642	27.6554	27.6091	27.7578	27.7608	27.7089	27.7435	27.5788	27.7541	27.7141	27.7143	27.8242
P51150	RAB7A_MOUSE	Ras-related protein Rab-7a OS=Mus musculus GN=Rab7a PE=1 SV=2	Rab7a Rab7	2.57025e+09	2.30478e+09	2.61228e+09	2.94595e+09	2.76125e+09	2.75624e+09	2.91861e+09	2.7726e+09	3.15554e+09	3.20254e+09	2.88329e+09	2.91804e+09	2.6306e+09	2.62858e+09	2.60612e+09	2.66473e+09	2.94489e+09	3.00727e+09	3.18465e+09	2.90926e+09	31.2593	31.102	31.2827	31.4561	31.3627	31.3601	31.4426	31.3686	31.5552	31.5766	31.4251	31.4424	31.2927	31.2916	31.2793	31.3113	31.4556	31.4858	31.5685	31.438
P16125	LDHB_MOUSE	L-lactate dehydrogenase B chain OS=Mus musculus GN=Ldhb PE=1 SV=2	Ldhb Ldh-2 Ldh2	3.97101e+09	4.00177e+09	4.01934e+09	3.77028e+09	3.47524e+09	4.32779e+09	3.31488e+09	3.60492e+09	4.43208e+09	4.33593e+09	4.26013e+09	4.20262e+09	4.99003e+09	4.45766e+09	4.64248e+09	4.3105e+09	4.33121e+09	3.70221e+09	3.74125e+09	4.17846e+09	31.8869	31.898	31.9043	31.812	31.6945	32.011	31.6263	31.7473	32.0453	32.0137	31.9883	31.9686	32.2164	32.0536	32.1122	32.0052	32.0121	31.7857	31.8009	31.9603
Q6R0H7	GNAS1_MOUSE	Guanine nucleotide-binding protein G(s) subunit alpha isoforms XLas OS=Mus musculus GN=Gnas PE=2 SV=1	Gnas Gnas1	9.67316e+08	1.14459e+09	9.25132e+08	9.96741e+08	9.46094e+08	1.07542e+09	1.00716e+09	1.02073e+09	1.08242e+09	1.15563e+09	1.01088e+09	1.12654e+09	1.05003e+09	1.02373e+09	1.0937e+09	9.387e+08	1.0969e+09	1.06448e+09	1.09009e+09	1.13877e+09	29.8494	30.0922	29.7851	29.8926	29.8174	30.0023	29.9076	29.927	30.0116	30.106	29.913	30.0693	29.9678	29.9312	30.0266	29.8061	30.0308	29.9875	30.0218	30.0848
Q62351	TFR1_MOUSE	Transferrin receptor protein 1 OS=Mus musculus GN=Tfrc PE=1 SV=1	Tfrc Trfr	1.08448e+09	1.29779e+09	8.80223e+08	1.12672e+09	1.62086e+09	1.32488e+09	1.52439e+09	1.43842e+09	1.53331e+09	1.68629e+09	1.53792e+09	1.44999e+09	1.36375e+09	1.19586e+09	1.22493e+09	1.13745e+09	1.69655e+09	1.53967e+09	1.50075e+09	1.64139e+09	30.0144	30.2734	29.7133	30.0695	30.5941	30.3032	30.5056	30.4218	30.514	30.6512	30.5183	30.4334	30.3449	30.1554	30.1901	30.0832	30.66	30.52	30.483	30.6123
P35278	RAB5C_MOUSE	Ras-related protein Rab-5C OS=Mus musculus GN=Rab5c PE=1 SV=2	Rab5c	9.97283e+06	5.85951e+06	1.02511e+07	7.76775e+06	7.76384e+06	6.45269e+06	7.22693e+06	7.7538e+06	8.8108e+06	4.83076e+06	8.76112e+06	8.13111e+06	9.30709e+06	7.43894e+06	7.9479e+06	7.21192e+06	8.87341e+06	6.16324e+06	8.20028e+06	5.51403e+06	23.2496	22.4823	23.2893	22.8891	22.8883	22.6215	22.785	22.8865	23.0708	22.2038	23.0627	22.955	23.1499	22.8267	22.9221	22.782	23.0811	22.5553	22.9672	22.3947
P14824	ANXA6_MOUSE	Annexin A6 OS=Mus musculus GN=Anxa6 PE=1 SV=3	Anxa6 Anx6	1.12953e+09	1.13288e+09	1.06757e+09	1.28211e+09	1.49037e+09	1.25286e+09	1.26127e+09	1.2936e+09	1.2854e+09	1.21737e+09	1.37203e+09	1.24119e+09	1.1837e+09	1.27225e+09	1.48827e+09	1.10083e+09	1.50897e+09	1.3475e+09	1.83316e+09	1.4554e+09	30.0731	30.0773	29.9917	30.2559	30.473	30.2226	30.2322	30.2687	30.2596	30.1811	30.3537	30.2091	30.1407	30.2447	30.471	30.0359	30.4909	30.3276	30.7717	30.4388
P97384	ANX11_MOUSE	Annexin A11 OS=Mus musculus GN=Anxa11 PE=1 SV=2	Anxa11 Anx11	1.64318e+09	1.17793e+09	1.81459e+09	1.94019e+09	1.16012e+09	1.42724e+09	1.77669e+09	1.15599e+09	1.69548e+09	1.30447e+09	1.64676e+09	1.51676e+09	1.11057e+09	1.85017e+09	1.70407e+09	1.77152e+09	9.22177e+08	1.3033e+09	1.65898e+09	1.45819e+09	30.6138	30.1336	30.757	30.8535	30.1116	30.4106	30.7265	30.1065	30.6591	30.2808	30.617	30.4983	30.0487	30.785	30.6663	30.7223	29.7805	30.2795	30.6277	30.4415
P70168	IMB1_MOUSE	Importin subunit beta-1 OS=Mus musculus GN=Kpnb1 PE=1 SV=2	Kpnb1 Impnb	3.02904e+08	3.04989e+08	3.17417e+08	3.33986e+08	2.9579e+08	2.98785e+08	3.26325e+08	3.09065e+08	2.83e+08	3.09173e+08	3.05429e+08	3.22017e+08	2.96571e+08	2.94319e+08	3.00984e+08	3.01776e+08	2.90683e+08	3.34676e+08	2.97995e+08	2.83549e+08	28.1743	28.1842	28.2418	28.3152	28.14	28.1545	28.2817	28.2033	28.0762	28.2038	28.1863	28.2626	28.1438	28.1328	28.1651	28.1689	28.1149	28.3182	28.1507	28.079
P26040	EZRI_MOUSE	Ezrin OS=Mus musculus GN=Ezr PE=1 SV=3	Ezr Vil2	2.07466e+08	2.28379e+08	1.73962e+08	2.08965e+08	2.52951e+08	2.19646e+08	2.29794e+08	2.55617e+08	2.13955e+08	2.52335e+08	2.28511e+08	2.26707e+08	2.22232e+08	2.04973e+08	2.15732e+08	1.85489e+08	2.50437e+08	2.69864e+08	3.15997e+08	2.96078e+08	27.6283	27.7669	27.3742	27.6387	27.9143	27.7106	27.7758	27.9294	27.6727	27.9108	27.7677	27.7563	27.7275	27.6109	27.6847	27.4668	27.8999	28.0077	28.2353	28.1414
P97429	ANXA4_MOUSE	Annexin A4 OS=Mus musculus GN=Anxa4 PE=2 SV=4	Anxa4 Anx4	2.4575e+08	2.23584e+08	2.16435e+08	2.4899e+08	2.50377e+08	2.41206e+08	2.27265e+08	2.40716e+08	2.35873e+08	2.16106e+08	2.337e+08	2.44144e+08	2.40001e+08	2.45046e+08	2.60183e+08	2.42705e+08	2.71555e+08	2.26758e+08	2.67893e+08	2.39159e+08	27.8726	27.7362	27.6894	27.8915	27.8995	27.8457	27.7598	27.8428	27.8134	27.6872	27.8001	27.8632	27.8385	27.8685	27.955	27.8546	28.0167	27.7566	27.9971	27.8334
Q91V92	ACLY_MOUSE	ATP-citrate synthase OS=Mus musculus GN=Acly PE=1 SV=1	Acly	1.54647e+09	1.34573e+09	1.6239e+09	1.56596e+09	1.25704e+09	1.46827e+09	1.21034e+09	1.34977e+09	1.50215e+09	1.41206e+09	1.47101e+09	1.58694e+09	1.67156e+09	1.62244e+09	1.50949e+09	1.58676e+09	1.45177e+09	1.22327e+09	1.4733e+09	1.3299e+09	30.5263	30.3257	30.5968	30.5444	30.2274	30.4515	30.1728	30.3301	30.4844	30.3952	30.4542	30.5636	30.6386	30.5955	30.4914	30.5634	30.4352	30.1881	30.4564	30.3087
Q91V41	RAB14_MOUSE	Ras-related protein Rab-14 OS=Mus musculus GN=Rab14 PE=1 SV=3	Rab14	4.37683e+08	5.49663e+08	4.34166e+08	4.90405e+08	5.04722e+08	4.77879e+08	5.42909e+08	4.76883e+08	4.4442e+08	4.88208e+08	4.70341e+08	4.36406e+08	4.5229e+08	4.46531e+08	4.28252e+08	4.45505e+08	4.64779e+08	5.71977e+08	5.08626e+08	5.968e+08	28.7053	29.034	28.6937	28.8694	28.9109	28.8321	29.0161	28.8291	28.7273	28.8629	28.8091	28.7011	28.7527	28.7342	28.6739	28.7309	28.792	29.0914	28.922	29.1527
P62874	GBB1_MOUSE	Guanine nucleotide-binding protein G(I)/G(S)/G(T) subunit beta-1 OS=Mus musculus GN=Gnb1 PE=1 SV=3	Gnb1	3.17244e+08	1.94478e+08	3.1299e+08	2.5059e+08	2.5534e+08	2.60639e+08	1.87941e+08	2.43946e+08	3.02328e+08	2.65694e+08	2.81067e+08	3.58664e+08	2.65957e+08	2.91297e+08	3.04006e+08	3.08709e+08	3.06132e+08	2.48458e+08	2.48867e+08	2.70585e+08	28.241	27.535	28.2215	27.9008	27.9278	27.9575	27.4857	27.862	28.1715	27.9852	28.0663	28.4181	27.9866	28.1179	28.1795	28.2017	28.1896	27.8884	27.8908	28.0115
Q02053	UBA1_MOUSE	Ubiquitin-like modifier-activating enzyme 1 OS=Mus musculus GN=Uba1 PE=1 SV=1	Uba1 Sbx Ube1 Ube1ax Ube1x	4.93517e+09	3.69508e+09	4.43396e+09	5.07557e+09	4.47887e+09	4.75348e+09	3.86874e+09	4.2405e+09	4.61475e+09	4.24354e+09	5.06116e+09	4.55735e+09	4.87227e+09	4.84455e+09	4.71502e+09	4.58055e+09	4.57245e+09	3.22654e+09	4.7761e+09	4.17184e+09	32.2005	31.783	32.0459	32.2409	32.0605	32.1463	31.8492	31.9816	32.1036	31.9826	32.2368	32.0855	32.1819	32.1737	32.1346	32.0929	32.0903	31.5873	32.1532	31.958
P35441	TSP1_MOUSE	Thrombospondin-1 OS=Mus musculus GN=Thbs1 PE=1 SV=1	Thbs1 Tsp1	2.22111e+10	2.84773e+10	2.25708e+10	2.34098e+10	3.60313e+10	3.16981e+10	4.31471e+10	4.56533e+10	2.05919e+10	2.10716e+10	1.95195e+10	1.94905e+10	2.11667e+10	2.08763e+10	1.96292e+10	2.18619e+10	1.8438e+10	1.89556e+10	1.83875e+10	2.00231e+10	34.3706	34.7291	34.3937	34.4464	35.0685	34.8837	35.3285	35.41	34.2614	34.2946	34.1842	34.1821	34.3011	34.2811	34.1923	34.3477	34.102	34.1419	34.098	34.2209
P62827	RAN_MOUSE	GTP-binding nuclear protein Ran OS=Mus musculus GN=Ran PE=1 SV=3	Ran Rasl2-8	2.48295e+09	2.55037e+09	2.58995e+09	2.67199e+09	2.39642e+09	2.48845e+09	2.51883e+09	2.27474e+09	2.61154e+09	2.57508e+09	2.79034e+09	2.57509e+09	2.67525e+09	2.8333e+09	2.831e+09	2.66833e+09	2.53058e+09	2.58292e+09	2.48472e+09	2.60455e+09	31.2094	31.2481	31.2703	31.3153	31.1582	31.2126	31.2301	31.0831	31.2823	31.262	31.3778	31.262	31.317	31.3998	31.3987	31.3133	31.2368	31.2664	31.2104	31.2784
Q9WV91	FPRP_MOUSE	Prostaglandin F2 receptor negative regulator OS=Mus musculus GN=Ptgfrn PE=1 SV=2	Ptgfrn Fprp	3.29098e+09	3.56271e+09	2.91848e+09	3.44497e+09	6.87417e+09	5.96562e+09	7.15624e+09	6.99878e+09	4.41042e+09	4.86802e+09	4.48714e+09	4.44535e+09	4.29275e+09	3.7607e+09	3.64147e+09	3.29599e+09	4.91547e+09	3.96074e+09	4.36242e+09	4.53988e+09	31.6159	31.7303	31.4426	31.6818	32.6785	32.474	32.7366	32.7045	32.0383	32.1807	32.0631	32.0496	31.9993	31.8084	31.7619	31.6181	32.1947	31.8831	32.0225	32.08
P80316	TCPE_MOUSE	T-complex protein 1 subunit epsilon OS=Mus musculus GN=Cct5 PE=1 SV=1	Cct5 Ccte Kiaa0098	2.6295e+09	2.68571e+09	2.50073e+09	2.62757e+09	2.03646e+09	2.58077e+09	2.8323e+09	2.08212e+09	3.20249e+09	2.66774e+09	2.62285e+09	2.67344e+09	2.89002e+09	2.84819e+09	3.03912e+09	2.65326e+09	2.86812e+09	3.32026e+09	2.6874e+09	3.81473e+09	31.2921	31.3227	31.2197	31.2911	30.9234	31.2652	31.3993	30.9554	31.5765	31.313	31.2885	31.316	31.4284	31.4074	31.501	31.3051	31.4175	31.6286	31.3236	31.8289
P80318	TCPG_MOUSE	T-complex protein 1 subunit gamma OS=Mus musculus GN=Cct3 PE=1 SV=1	Cct3 Cctg	1.71837e+09	2.02501e+09	1.94566e+09	2.00942e+09	1.97641e+09	1.76832e+09	1.68206e+09	1.8216e+09	1.81259e+09	1.94683e+09	1.96352e+09	1.99728e+09	1.76544e+09	1.93432e+09	1.73629e+09	1.92448e+09	2.11724e+09	2.42679e+09	2.38427e+09	2.29452e+09	30.6784	30.9153	30.8576	30.9041	30.8802	30.7197	30.6476	30.7626	30.7554	30.8585	30.8708	30.8954	30.7174	30.8492	30.6934	30.8418	30.9795	31.1764	31.1509	31.0955
P18572	BASI_MOUSE	Basigin OS=Mus musculus GN=Bsg PE=1 SV=2	Bsg	2.07471e+08	1.99073e+08	1.73809e+08	1.97807e+08	2.93328e+08	2.59139e+08	2.5817e+08	2.80719e+08	2.79058e+08	2.93012e+08	2.71573e+08	3.20307e+08	2.16721e+08	2.03413e+08	2.04747e+08	1.9784e+08	3.2826e+08	2.3969e+08	3.11293e+08	2.93029e+08	27.6283	27.5687	27.3729	27.5595	28.1279	27.9491	27.9437	28.0646	28.056	28.1264	28.0168	28.2549	27.6913	27.5998	27.6093	27.5598	28.2903	27.8366	28.2137	28.1265
P50247	SAHH_MOUSE	Adenosylhomocysteinase OS=Mus musculus GN=Ahcy PE=1 SV=3	Ahcy	1.5482e+10	1.78965e+10	1.60672e+10	1.7182e+10	1.49322e+10	1.67512e+10	1.70286e+10	1.48745e+10	1.78193e+10	1.8032e+10	1.78431e+10	1.65164e+10	1.83955e+10	1.75816e+10	1.86273e+10	1.7301e+10	1.68578e+10	1.70572e+10	1.65155e+10	1.74353e+10	33.8499	34.059	33.9034	34.0002	33.7977	33.9635	33.9872	33.7921	34.0527	34.0698	34.0546	33.9432	34.0986	34.0333	34.1167	34.0101	33.9727	33.9897	33.9431	34.0213
P61021	RAB5B_MOUSE	Ras-related protein Rab-5B OS=Mus musculus GN=Rab5b PE=1 SV=1	Rab5b	1.79199e+07	2.15228e+07	1.65942e+07	1.96824e+07	1.89854e+07	1.96108e+07	2.22818e+07	1.8591e+07	1.9863e+07	2.24572e+07	1.89756e+07	1.89485e+07	2.19906e+07	2.03893e+07	2.02979e+07	2.22169e+07	1.8125e+07	2.89702e+07	2.02549e+07	2.01103e+07	24.0951	24.3594	23.9842	24.2304	24.1784	24.2251	24.4094	24.1481	24.2436	24.4207	24.1776	24.1756	24.3904	24.2813	24.2748	24.4052	24.1115	24.7881	24.2718	24.2614
P62821	RAB1A_MOUSE	Ras-related protein Rab-1A OS=Mus musculus GN=Rab1A PE=1 SV=3	Rab1A Rab1	1.24363e+09	7.59328e+08	1.34467e+09	1.03276e+09	7.28757e+08	6.11426e+08	4.14709e+08	7.61733e+08	6.85143e+08	4.58191e+08	8.78347e+08	1.11183e+09	1.03181e+09	8.35776e+08	7.39227e+08	9.12156e+08	9.30062e+08	6.68059e+08	1.11898e+09	5.65563e+08	30.2119	29.5001	30.3246	29.9439	29.4409	29.1876	28.6275	29.5047	29.3518	28.7714	29.7102	30.0503	29.9425	29.6385	29.4614	29.7647	29.7928	29.3154	30.0595	29.0751
P17047	LAMP2_MOUSE	Lysosome-associated membrane glycoprotein 2 OS=Mus musculus GN=Lamp2 PE=2 SV=2	Lamp2 Lamp-2	3.9913e+07	4.92063e+07	2.9252e+07	4.42409e+07	3.09837e+07	2.44381e+07	3.72853e+07	2.63498e+07	4.22496e+07	6.14828e+07	6.31833e+07	3.77675e+07	4.40069e+07	3.44593e+07	5.32285e+07	2.15324e+07	5.73892e+07	5.45583e+07	7.21557e+07	5.49719e+07	25.2504	25.5523	24.802	25.3989	24.885	24.5426	25.1521	24.6513	25.3324	25.8737	25.913	25.1706	25.3912	25.0384	25.6657	24.36	25.7743	25.7013	26.1046	25.7122
Q61739	ITA6_MOUSE	Integrin alpha-6 OS=Mus musculus GN=Itga6 PE=1 SV=3	Itga6	6.64434e+09	1.92009e+09	5.73364e+09	6.38949e+09	7.75018e+09	3.30712e+09	4.23153e+09	6.71147e+09	6.71386e+09	1.01681e+09	6.72775e+09	5.64125e+09	5.90013e+09	6.2389e+09	5.68557e+09	4.55103e+09	5.09931e+09	7.29328e+08	6.6448e+09	1.71479e+09	32.6295	30.8385	32.4168	32.5731	32.8516	31.6229	31.9785	32.644	32.6445	29.9214	32.6475	32.3934	32.4581	32.5386	32.4047	32.0835	32.2477	29.442	32.6296	30.6754
P13020	GELS_MOUSE	Gelsolin OS=Mus musculus GN=Gsn PE=1 SV=3	Gsn Gsb	1.74057e+09	1.99235e+09	1.71234e+09	1.69879e+09	1.91256e+09	1.78851e+09	1.71929e+09	1.9478e+09	1.74197e+09	1.93204e+09	1.81252e+09	1.78232e+09	1.83836e+09	1.72151e+09	1.75881e+09	1.74663e+09	1.8193e+09	1.94704e+09	1.73415e+09	1.84865e+09	30.6969	30.8918	30.6733	30.6619	30.8329	30.7361	30.6792	30.8592	30.6981	30.8475	30.7553	30.7311	30.7758	30.681	30.712	30.7019	30.7607	30.8586	30.6916	30.7838
P11276	FINC_MOUSE	Fibronectin OS=Mus musculus GN=Fn1 PE=1 SV=4	Fn1	9.95436e+10	1.35248e+11	8.71377e+10	1.10928e+11	1.49022e+11	9.38975e+10	1.84266e+11	2.12417e+11	5.16386e+10	6.15117e+10	5.82285e+10	4.37892e+10	7.80576e+10	7.88134e+10	6.90197e+10	9.16878e+10	6.48632e+10	1.33198e+11	1.19409e+11	6.86119e+10	36.5346	36.9768	36.3426	36.6908	37.1167	36.4504	37.423	37.6281	35.5877	35.8401	35.761	35.3499	36.1838	36.1977	36.0063	36.416	35.9167	36.9548	36.7971	35.9977
P68510	1433F_MOUSE	14-3-3 protein eta OS=Mus musculus GN=Ywhah PE=1 SV=2	Ywhah	2.94883e+08	3.22934e+08	2.84533e+08	3.13452e+08	2.60495e+08	3.00471e+08	3.64412e+08	2.86177e+08	2.63689e+08	2.78524e+08	2.5832e+08	2.83121e+08	2.95785e+08	2.874e+08	3.15969e+08	2.98303e+08	2.54526e+08	3.56803e+08	2.16379e+08	3.06707e+08	28.1356	28.2667	28.084	28.2237	27.9567	28.1627	28.441	28.0923	27.9743	28.0532	27.9446	28.0768	28.14	28.0985	28.2352	28.1522	27.9232	28.4106	27.689	28.1923
P68369	TBA1A_MOUSE	Tubulin alpha-1A chain OS=Mus musculus GN=Tuba1a PE=1 SV=1	Tuba1a Tuba1	1.45719e+08	7.73127e+07	1.33123e+08	1.21635e+08	9.31554e+07	9.37301e+07	7.88377e+07	1.03668e+08	1.2591e+08	8.07998e+07	1.08584e+08	1.41934e+08	1.39805e+08	1.31714e+08	1.11252e+08	1.33951e+08	1.31046e+08	6.21599e+07	1.11901e+08	7.52635e+07	27.1186	26.2042	26.9882	26.858	26.4731	26.482	26.2324	26.6274	26.9078	26.2678	26.6942	27.0806	27.0588	26.9728	26.7293	26.9971	26.9655	25.8895	26.7376	26.1654
P40142	TKT_MOUSE	Transketolase OS=Mus musculus GN=Tkt PE=1 SV=1	Tkt	4.16946e+08	3.54467e+08	4.33286e+08	3.77141e+08	3.29313e+08	3.07987e+08	3.16293e+08	3.19231e+08	3.15825e+08	2.43788e+08	3.87914e+08	3.91475e+08	4.17445e+08	3.68711e+08	4.48664e+08	3.45891e+08	3.26505e+08	2.59057e+08	3.36626e+08	2.52282e+08	28.6353	28.4011	28.6907	28.4905	28.2949	28.1983	28.2367	28.25	28.2345	27.8611	28.5312	28.5443	28.637	28.4579	28.7411	28.3657	28.2825	27.9487	28.3266	27.9105
P11983	TCPA_MOUSE	T-complex protein 1 subunit alpha OS=Mus musculus GN=Tcp1 PE=1 SV=3	Tcp1 Cct1 Ccta	6.13988e+08	6.64072e+08	5.9209e+08	7.17717e+08	5.97406e+08	5.9441e+08	6.555e+08	5.79301e+08	6.7432e+08	7.07134e+08	6.9752e+08	6.3004e+08	5.89528e+08	6.47345e+08	6.88342e+08	6.23603e+08	7.10129e+08	8.1228e+08	8.64675e+08	7.76633e+08	29.1936	29.3068	29.1412	29.4188	29.1541	29.1469	29.288	29.1097	29.3289	29.3974	29.3777	29.2309	29.135	29.27	29.3586	29.2161	29.4035	29.5974	29.6876	29.5327
P54116	STOM_MOUSE	Erythrocyte band 7 integral membrane protein OS=Mus musculus GN=Stom PE=1 SV=3	Stom Epb7.2 Epb72	2.30409e+08	3.0037e+08	2.08882e+08	2.76896e+08	2.54331e+08	2.35899e+08	2.40529e+08	2.25161e+08	3.6047e+08	3.96336e+08	3.64518e+08	3.45216e+08	3.15513e+08	3.08719e+08	3.08812e+08	2.61063e+08	4.05211e+08	3.97244e+08	3.79975e+08	4.02888e+08	27.7796	28.1622	27.6381	28.0448	27.9221	27.8136	27.8416	27.7464	28.4253	28.5621	28.4414	28.3629	28.2331	28.2017	28.2022	27.9598	28.5941	28.5654	28.5013	28.5858
P53986	MOT1_MOUSE	Monocarboxylate transporter 1 OS=Mus musculus GN=Slc16a1 PE=1 SV=1	Slc16a1 Mct1	1.61037e+08	2.11924e+08	1.27018e+08	1.71632e+08	2.83126e+08	2.31852e+08	2.94286e+08	2.83245e+08	2.70382e+08	3.24427e+08	2.79957e+08	2.89282e+08	1.949e+08	1.78142e+08	1.8319e+08	1.61499e+08	3.09015e+08	3.53042e+08	3.37262e+08	3.54558e+08	27.2628	27.659	26.9205	27.3547	28.0769	27.7886	28.1326	28.0775	28.0104	28.2733	28.0606	28.1079	27.5382	27.4084	27.4488	27.2669	28.2031	28.3953	28.3293	28.4014
P55258	RAB8A_MOUSE	Ras-related protein Rab-8A OS=Mus musculus GN=Rab8a PE=1 SV=2	Rab8a Mel Rab8	6.46266e+07	1.09018e+08	2.7995e+07	7.84118e+07	5.84257e+07	6.64949e+07	4.14396e+07	4.89024e+07	4.85206e+07	5.7502e+07	4.60698e+07	5.75457e+07	3.94424e+07	6.96514e+07	4.12084e+07	5.93863e+07	6.14336e+07	7.20954e+07	7.24887e+07	4.17149e+07	25.9456	26.7	24.7387	26.2246	25.8001	25.9867	25.3045	25.5434	25.5321	25.7771	25.4573	25.7782	25.2332	26.0536	25.2964	25.8236	25.8725	26.1034	26.1113	25.3141
P02104	HBE_MOUSE	Hemoglobin subunit epsilon-Y2 OS=Mus musculus GN=Hbb-y PE=1 SV=2	Hbb-y	1.94248e+11	1.5112e+11	2.19159e+11	2.05239e+11	2.09586e+11	2.05709e+11	1.91436e+11	1.74303e+11	2.36247e+11	1.82999e+11	2.43306e+11	2.04414e+11	2.23577e+11	1.88937e+11	2.00895e+11	1.994e+11	1.8801e+11	1.12111e+11	1.90182e+11	1.4203e+11	37.4991	37.1369	37.6732	37.5785	37.6087	37.5818	37.4781	37.3428	37.7815	37.413	37.824	37.5727	37.702	37.4591	37.5476	37.5369	37.452	36.7061	37.4686	37.0474
P98083	SHC1_MOUSE	SHC-transforming protein 1 OS=Mus musculus GN=Shc1 PE=1 SV=3	Shc1 Shc ShcA	1.17322e+11	1.61065e+11	1.05009e+11	1.20858e+11	1.59525e+11	1.26878e+11	1.70576e+11	1.46246e+11	1.33795e+11	1.51597e+11	1.35365e+11	1.07262e+11	1.25457e+11	1.05933e+11	1.02282e+11	1.16939e+11	1.31781e+11	1.84862e+11	1.20713e+11	1.59052e+11	36.7717	37.2289	36.6117	36.8145	37.215	36.8846	37.3116	37.0896	36.9612	37.1414	36.9781	36.6424	36.8684	36.6244	36.5738	36.767	36.9394	37.4277	36.8128	37.2107
P01027	CO3_MOUSE	Complement C3 OS=Mus musculus GN=C3 PE=1 SV=3	C3	9.88207e+10	9.61795e+10	1.07277e+11	1.0195e+11	9.15732e+10	1.0523e+11	1.02464e+11	8.90506e+10	1.14123e+11	1.09656e+11	1.1533e+11	1.07468e+11	1.12237e+11	1.07972e+11	1.21242e+11	1.07872e+11	1.04694e+11	9.73237e+10	1.00526e+11	1.04001e+11	36.5241	36.485	36.6426	36.5691	36.4142	36.6148	36.5763	36.3739	36.7318	36.6742	36.747	36.6451	36.7078	36.6519	36.8191	36.6505	36.6074	36.5021	36.5488	36.5978
Q64337	SQSTM_MOUSE	Sequestosome-1 OS=Mus musculus GN=Sqstm1 PE=1 SV=1	Sqstm1 A170 STAP	8.65606e+10	9.30576e+10	9.25395e+10	9.066e+10	8.67029e+10	1.04854e+11	9.32534e+10	7.51627e+10	9.13597e+10	1.08719e+11	1.00467e+11	9.58103e+10	1.01975e+11	7.90965e+10	1.00747e+11	8.9437e+10	9.50911e+10	1.02345e+11	7.46671e+10	9.80835e+10	36.333	36.4374	36.4294	36.3997	36.3354	36.6096	36.4404	36.1293	36.4108	36.6618	36.5479	36.4795	36.5694	36.2029	36.5519	36.3802	36.4686	36.5747	36.1198	36.5133
P01942	HBA_MOUSE	Hemoglobin subunit alpha OS=Mus musculus GN=Hba PE=1 SV=2	Hba Hba-a1	7.6851e+10	8.22607e+10	8.36472e+10	8.57876e+10	1.10415e+11	1.22225e+11	1.23176e+11	1.02238e+11	8.69766e+10	9.76706e+10	9.66383e+10	8.3145e+10	8.81773e+10	8.15969e+10	8.91755e+10	8.57404e+10	7.56497e+10	9.04191e+10	8.29439e+10	9.33646e+10	36.1613	36.2595	36.2836	36.32	36.6841	36.8307	36.8419	36.5731	36.3399	36.5072	36.4919	36.2749	36.3597	36.2478	36.3759	36.3193	36.1386	36.3959	36.2714	36.4422
Q99KP6	PRP19_MOUSE	Pre-mRNA-processing factor 19 OS=Mus musculus GN=Prpf19 PE=2 SV=1	Prpf19 Prp19 Snev	7.04677e+10	6.52856e+10	8.1486e+10	7.15791e+10	6.24908e+10	7.98583e+10	8.24837e+10	6.1256e+10	7.55914e+10	8.57645e+10	7.78569e+10	7.15781e+10	6.30601e+10	5.81176e+10	7.08695e+10	6.35611e+10	6.08553e+10	7.79652e+10	5.91803e+10	7.39385e+10	36.0362	35.926	36.2458	36.0588	35.8629	36.2167	36.2634	35.8341	36.1375	36.3197	36.1801	36.0588	35.876	35.7583	36.0444	35.8874	35.8247	36.1821	35.7844	36.1056
Q07113	MPRI_MOUSE	Cation-independent mannose-6-phosphate receptor OS=Mus musculus GN=Igf2r PE=1 SV=1	Igf2r	6.14923e+10	3.66027e+10	7.00917e+10	4.66641e+10	4.33594e+10	5.73826e+10	3.99545e+10	3.68679e+10	6.12556e+10	5.37234e+10	5.71011e+10	7.33611e+10	5.87595e+10	6.61097e+10	6.6278e+10	6.3318e+10	5.80988e+10	3.67457e+10	5.14568e+10	5.09588e+10	35.8397	35.0912	36.0285	35.4416	35.3356	35.7399	35.2176	35.1016	35.8341	35.6448	35.7328	36.0943	35.7741	35.9441	35.9478	35.8819	35.7578	35.0969	35.5826	35.5686
P19221	THRB_MOUSE	Prothrombin OS=Mus musculus GN=F2 PE=1 SV=1	F2 Cf2	5.8211e+10	4.63788e+10	5.75598e+10	5.44099e+10	4.58402e+10	5.27363e+10	4.56684e+10	4.30186e+10	6.16179e+10	5.37141e+10	5.45657e+10	5.55726e+10	6.28693e+10	6.27953e+10	6.27086e+10	6.0708e+10	5.6201e+10	3.88638e+10	5.32024e+10	5.05907e+10	35.7606	35.4327	35.7443	35.6632	35.4159	35.6181	35.4105	35.3242	35.8426	35.6446	35.6673	35.6937	35.8716	35.8699	35.8679	35.8212	35.7099	35.1777	35.6308	35.5582
P29699	FETUA_MOUSE	Alpha-2-HS-glycoprotein OS=Mus musculus GN=Ahsg PE=1 SV=1	Ahsg Fetua	5.02287e+10	7.13757e+10	4.18655e+10	3.64915e+10	4.64592e+10	4.08365e+10	2.79144e+10	5.319e+10	3.37416e+10	4.93231e+10	3.64639e+10	4.23064e+10	4.22973e+10	3.59253e+10	2.66399e+10	4.45245e+10	5.05892e+10	5.19738e+10	3.22282e+10	5.62893e+10	35.5478	36.0547	35.285	35.0868	35.4352	35.2491	34.7003	35.6304	34.9738	35.5215	35.0858	35.3002	35.2998	35.0643	34.6329	35.3739	35.5581	35.5971	34.9076	35.7121
Q9CWL2	CASZ1_MOUSE	Zinc finger protein castor homolog 1 OS=Mus musculus GN=Casz1 PE=2 SV=3	Casz1 Cst D4Ertd432e Kiaa3026	4.5027e+10	4.00262e+10	4.60883e+10	3.28676e+10	3.67507e+10	4.56923e+10	3.53115e+10	3.41714e+10	4.70582e+10	4.90693e+10	3.9455e+10	4.8161e+10	4.68062e+10	4.90828e+10	4.61647e+10	4.71468e+10	4.62229e+10	4.49627e+10	3.94557e+10	4.68953e+10	35.3901	35.2202	35.4237	34.9359	35.0971	35.4112	35.0394	34.9921	35.4537	35.5141	35.1995	35.4871	35.446	35.5145	35.4261	35.4564	35.4279	35.388	35.1995	35.4487
Q80T14	FRAS1_MOUSE	Extracellular matrix protein FRAS1 OS=Mus musculus GN=Fras1 PE=2 SV=2	Fras1 Kiaa1500	3.96778e+10	3.76536e+10	4.35205e+10	3.93675e+10	3.33106e+10	4.3222e+10	4.05641e+10	2.66567e+10	4.09505e+10	4.47901e+10	4.11655e+10	4.27525e+10	3.84298e+10	3.96365e+10	4.5709e+10	4.17151e+10	3.78824e+10	3.86308e+10	3.51631e+10	4.23677e+10	35.2076	35.1321	35.341	35.1963	34.9553	35.331	35.2395	34.6338	35.2532	35.3825	35.2607	35.3153	35.1615	35.2061	35.4118	35.2799	35.1408	35.169	35.0333	35.3022
Q5SSH7	ZZEF1_MOUSE	Zinc finger ZZ-type and EF-hand domain-containing protein 1 OS=Mus musculus GN=Zzef1 PE=1 SV=2	Zzef1 Kiaa0399	3.63766e+10	4.14274e+10	3.92371e+10	4.30834e+10	4.44488e+10	3.87932e+10	2.95693e+10	3.98265e+10	4.08332e+10	4.42881e+10	3.78882e+10	4.20511e+10	2.82249e+10	3.49649e+10	2.64872e+10	4.52635e+10	3.28308e+10	4.93339e+10	4.20118e+10	4.89941e+10	35.0823	35.2699	35.1915	35.3264	35.3714	35.1751	34.7834	35.213	35.249	35.3662	35.141	35.2914	34.7162	35.0252	34.6246	35.3976	34.9343	35.5219	35.2901	35.5119
Q05793	PGBM_MOUSE	Basement membrane-specific heparan sulfate proteoglycan core protein OS=Mus musculus GN=Hspg2 PE=1 SV=1	Hspg2	3.3173e+10	3.40064e+10	3.26377e+10	3.59819e+10	4.64174e+10	3.67186e+10	5.25893e+10	5.60724e+10	3.15572e+10	3.22042e+10	3.40299e+10	2.91011e+10	3.01676e+10	2.83739e+10	2.79751e+10	3.09987e+10	3.06971e+10	2.69353e+10	3.15076e+10	2.77586e+10	34.9493	34.9851	34.9258	35.0666	35.4339	35.0958	35.6141	35.7066	34.8773	34.9065	34.9861	34.7604	34.8123	34.7238	34.7034	34.8515	34.8374	34.6488	34.875	34.6922
Q9QYX7	PCLO_MOUSE	Protein piccolo OS=Mus musculus GN=Pclo PE=1 SV=4	Pclo Acz	2.64848e+10	3.48151e+10	2.96245e+10	3.51791e+10	3.21207e+10	3.09927e+10	2.75773e+10	2.76063e+10	2.78043e+10	3.44581e+10	3.50941e+10	2.72056e+10	2.47657e+10	2.88466e+10	2.93639e+10	2.98719e+10	3.16314e+10	4.53775e+10	3.87227e+10	3.81727e+10	34.6244	35.019	34.7861	35.034	34.9028	34.8512	34.6828	34.6843	34.6946	35.0041	35.0305	34.6632	34.5276	34.7477	34.7733	34.7981	34.8806	35.4013	35.1725	35.1518
Q3TTI8	YL021_MOUSE	Uncharacterized protein ENSP00000372125 homolog OS=Mus musculus PE=2 SV=1	Tex52	3.19394e+10	2.9774e+10	3.6125e+10	2.88859e+10	2.54852e+10	3.29417e+10	2.79205e+10	2.43437e+10	3.11737e+10	3.39188e+10	2.9907e+10	3.29012e+10	3.13123e+10	3.38416e+10	3.55269e+10	3.2763e+10	3.06062e+10	3.20318e+10	2.98066e+10	3.26209e+10	34.8946	34.7933	35.0723	34.7496	34.5689	34.9392	34.7006	34.5028	34.8596	34.9814	34.7998	34.9374	34.866	34.9781	35.0482	34.9313	34.8331	34.8988	34.7949	34.9251
Q62432	SMAD2_MOUSE	Mothers against decapentaplegic homolog 2 OS=Mus musculus GN=Smad2 PE=1 SV=2	Smad2 Madh2 Madr2	3.72956e+10	1.87941e+10	3.54385e+10	3.23829e+10	3.75622e+10	3.41306e+10	2.86934e+10	3.28789e+10	3.5005e+10	2.11251e+10	3.47245e+10	3.57879e+10	3.04076e+10	3.4434e+10	3.24652e+10	3.51699e+10	2.98066e+10	1.47277e+10	3.10011e+10	1.89186e+10	35.1183	34.1296	35.0446	34.9145	35.1286	34.9903	34.74	34.9364	35.0268	34.2982	35.0152	35.0588	34.8237	35.0031	34.9182	35.0336	34.7949	33.7778	34.8516	34.1391
Q7TSH4	CP110_MOUSE	Centriolar coiled-coil protein of 110 kDa OS=Mus musculus GN=Ccp110 PE=1 SV=1	Ccp110 Cep110 Cp110 Kiaa0419	3.44752e+10	2.4499e+10	3.40713e+10	2.86149e+10	2.32597e+10	3.33969e+10	2.57377e+10	2.68768e+10	3.46787e+10	3.20976e+10	2.91796e+10	3.64532e+10	2.67857e+10	3.14197e+10	3.02983e+10	3.23167e+10	2.33227e+10	2.53462e+10	2.90708e+10	2.96997e+10	35.0048	34.512	34.9878	34.736	34.4371	34.959	34.5832	34.6456	35.0133	34.9017	34.7642	35.0853	34.6407	34.871	34.8185	34.9116	34.441	34.561	34.7589	34.7897
Q8CIE6	COPA_MOUSE	Coatomer subunit alpha OS=Mus musculus GN=Copa PE=1 SV=2	Copa	3.24155e+10	2.81365e+10	3.40315e+10	2.94763e+10	2.51942e+10	3.00012e+10	3.28812e+10	2.44551e+10	3.14557e+10	3.16503e+10	3.25989e+10	3.40774e+10	2.95273e+10	2.52501e+10	2.91133e+10	2.74956e+10	3.06483e+10	2.3572e+10	2.39484e+10	2.63292e+10	34.916	34.7117	34.9862	34.7788	34.5524	34.8043	34.9365	34.5094	34.8726	34.8815	34.9241	34.9881	34.7813	34.5556	34.761	34.6785	34.8351	34.4564	34.4792	34.6159
O88342	WDR1_MOUSE	WD repeat-containing protein 1 OS=Mus musculus GN=Wdr1 PE=1 SV=3	Wdr1	3.26259e+10	2.93682e+10	3.07368e+10	2.42975e+10	2.37445e+10	2.7289e+10	2.22295e+10	2.17629e+10	3.5612e+10	3.30998e+10	2.56551e+10	3.06118e+10	3.84451e+10	3.01135e+10	2.8372e+10	3.03367e+10	3.41243e+10	2.29685e+10	2.65704e+10	3.04246e+10	34.9253	34.7735	34.8392	34.5001	34.4669	34.6676	34.3718	34.3411	35.0516	34.9461	34.5785	34.8334	35.1621	34.8097	34.7238	34.8203	34.9901	34.4189	34.6291	34.8245
Q8K2V1	PP4R1_MOUSE	Serine/threonine-protein phosphatase 4 regulatory subunit 1 OS=Mus musculus GN=Ppp4r1 PE=2 SV=2	Ppp4r1	3.84636e+10	1.16064e+10	4.20245e+10	2.59125e+10	2.0919e+10	2.73625e+10	1.38984e+10	1.81661e+10	3.26358e+10	1.79538e+10	2.42905e+10	4.401e+10	3.28489e+10	3.88334e+10	3.44418e+10	3.73939e+10	3.2946e+10	8.45593e+09	2.97476e+10	1.53872e+10	35.1628	33.4342	35.2905	34.5929	34.2841	34.6715	33.6942	34.0805	34.9257	34.0636	34.4997	35.3571	34.9351	35.1766	35.0034	35.1221	34.9394	32.9773	34.7921	33.841
Q68SA9	ATS7_MOUSE	A disintegrin and metalloproteinase with thrombospondin motifs 7 OS=Mus musculus GN=Adamts7 PE=1 SV=3	Adamts7	2.77409e+10	2.52163e+10	2.97446e+10	2.41014e+10	2.20644e+10	2.74896e+10	2.37731e+10	1.99261e+10	2.59704e+10	2.70765e+10	2.68015e+10	2.64488e+10	2.61055e+10	2.89685e+10	2.95996e+10	2.87553e+10	2.65118e+10	2.71927e+10	2.44211e+10	2.88536e+10	34.6913	34.5536	34.7919	34.4884	34.361	34.6782	34.4686	34.2139	34.5961	34.6563	34.6416	34.6225	34.6036	34.7538	34.7849	34.7431	34.6259	34.6625	34.5074	34.748
Q6ZQ06	CE162_MOUSE	Centrosomal protein of 162 kDa OS=Mus musculus GN=Cep162 PE=1 SV=2	Cep162 Kiaa1009 Qn1	2.45042e+10	3.36488e+10	2.24647e+10	1.89502e+10	2.81684e+10	2.66086e+10	1.38804e+10	3.20973e+10	2.16558e+10	2.84342e+10	1.62039e+10	2.60012e+10	2.35818e+10	2.30136e+10	1.21488e+10	2.46683e+10	2.35511e+10	2.74666e+10	1.72945e+10	2.89365e+10	34.5123	34.9698	34.3869	34.1415	34.7134	34.6312	33.6923	34.9017	34.334	34.7269	33.9156	34.5979	34.457	34.4218	33.5001	34.5219	34.4551	34.677	34.0096	34.7522
Q64475	H2B1B_MOUSE	Histone H2B type 1-B OS=Mus musculus GN=Hist1h2bb PE=1 SV=3	H2bc3 Hist1h2bb	8.58583e+09	1.33947e+10	5.26959e+09	8.9953e+09	1.83341e+10	1.30967e+10	1.79192e+10	1.96505e+10	1.89812e+10	2.59506e+10	1.73911e+10	1.55935e+10	1.21224e+10	1.85521e+10	9.59704e+09	1.48906e+10	5.81819e+10	5.50899e+10	4.45703e+10	4.74471e+10	32.9993	33.6409	32.295	33.0665	34.0938	33.6085	34.0608	34.1938	34.1439	34.5951	34.0176	33.8602	33.497	34.1109	33.1599	33.7937	35.7599	35.6811	35.3754	35.4656
P17563	SBP1_MOUSE	Selenium-binding protein 1 OS=Mus musculus GN=Selenbp1 PE=1 SV=2	Selenbp1 Lpsb	2.64657e+10	1.98696e+10	2.95915e+10	1.51906e+10	1.77387e+10	3.05161e+10	1.13135e+10	2.07264e+10	2.13089e+10	2.73971e+10	1.20752e+10	2.7178e+10	2.21692e+10	2.79432e+10	1.85286e+10	2.54561e+10	2.44769e+10	2.30453e+10	1.38202e+10	2.34251e+10	34.6234	34.2098	34.7845	33.8225	34.0462	34.8289	33.3973	34.2708	34.3107	34.6733	33.4913	34.6617	34.3678	34.7018	34.109	34.5673	34.5107	34.4238	33.6861	34.4473
Q8R1A4	DOCK7_MOUSE	Dedicator of cytokinesis protein 7 OS=Mus musculus GN=Dock7 PE=1 SV=3	Dock7 Gm430 Kiaa1771 Mnlt	2.0811e+10	1.87193e+10	2.19321e+10	2.36168e+10	2.36364e+10	1.68065e+10	1.43994e+10	1.72109e+10	1.92647e+10	1.62074e+10	2.31583e+10	2.27398e+10	2.2127e+10	2.23666e+10	1.8603e+10	2.20765e+10	2.85446e+10	1.51791e+10	2.7582e+10	1.61011e+10	34.2766	34.1238	34.3523	34.4591	34.4603	33.9683	33.7453	34.0026	34.1652	33.9159	34.4308	34.4045	34.3651	34.3806	34.1148	34.3618	34.7325	33.8214	34.683	33.9064
P97820	M4K4_MOUSE	Mitogen-activated protein kinase kinase kinase kinase 4 OS=Mus musculus GN=Map4k4 PE=1 SV=1	Map4k4 Nik	2.0113e+10	1.46437e+10	2.12716e+10	2.30684e+10	2.09061e+10	1.27765e+10	1.18917e+10	1.7707e+10	1.83781e+10	9.98012e+09	2.29887e+10	2.26659e+10	1.94798e+10	1.97345e+10	1.60947e+10	1.96794e+10	2.46825e+10	8.53894e+09	2.5587e+10	1.07845e+10	34.2274	33.7696	34.3082	34.4252	34.2832	33.5728	33.4692	34.0436	34.0973	33.2164	34.4202	34.3998	34.1813	34.2	33.9059	34.196	34.5228	32.9914	34.5747	33.3282
P62141	PP1B_MOUSE	Serine/threonine-protein phosphatase PP1-beta catalytic subunit OS=Mus musculus GN=Ppp1cb PE=1 SV=3	Ppp1cb	1.77957e+10	1.5193e+10	1.92166e+10	2.19342e+10	2.12165e+10	1.228e+10	1.33073e+10	1.75751e+10	1.78372e+10	1.04766e+10	2.51639e+10	1.88893e+10	1.83411e+10	1.68241e+10	1.7262e+10	1.83361e+10	2.05689e+10	9.68809e+09	2.40462e+10	1.03103e+10	34.0508	33.8227	34.1616	34.3525	34.3045	33.5156	33.6315	34.0328	34.0542	33.2865	34.5506	34.1369	34.0944	33.9698	34.0069	34.094	34.2597	33.1736	34.4851	33.2634
Q8VHG2	AMOT_MOUSE	Angiomotin OS=Mus musculus GN=Amot PE=1 SV=3	Amot Kiaa1071	2.07612e+10	2.18467e+10	2.09112e+10	1.1418e+10	1.8063e+10	2.60156e+10	9.48893e+09	2.51846e+10	2.26217e+10	1.98358e+10	1.11397e+10	2.08037e+10	2.06648e+10	1.32329e+10	8.9047e+09	1.43535e+10	1.82174e+10	1.66424e+10	5.51724e+09	1.98308e+10	34.2732	34.3467	34.2836	33.4106	34.0723	34.5987	33.1436	34.5518	34.397	34.2074	33.375	34.2761	34.2665	33.6234	33.0519	33.7407	34.0846	33.9541	32.3613	34.207
Q8R2G6	CCD80_MOUSE	Coiled-coil domain-containing protein 80 OS=Mus musculus GN=Ccdc80 PE=1 SV=2	Ccdc80 Urb	1.91832e+10	1.6508e+10	2.30703e+10	1.68579e+10	1.49531e+10	1.99518e+10	1.62048e+10	1.43039e+10	2.08343e+10	1.84126e+10	1.66559e+10	2.20704e+10	1.817e+10	1.50846e+10	1.32153e+10	1.71238e+10	2.00024e+10	1.23742e+10	1.19383e+10	1.7401e+10	34.1591	33.9424	34.4253	33.9727	33.7997	34.2158	33.9157	33.7357	34.2782	34.1	33.9553	34.3614	34.0808	33.8124	33.6215	33.9953	34.2195	33.5266	33.4749	34.0184
P51885	LUM_MOUSE	Lumican OS=Mus musculus GN=Lum PE=1 SV=2	Lum Lcn Ldc	1.78593e+10	1.71464e+10	1.88025e+10	1.82043e+10	1.54642e+10	1.86505e+10	1.81468e+10	1.57597e+10	1.80007e+10	1.90579e+10	1.81535e+10	1.79212e+10	1.67105e+10	1.53407e+10	1.78954e+10	1.60182e+10	1.54326e+10	1.63904e+10	1.39652e+10	1.64157e+10	34.056	33.9972	34.1302	34.0836	33.8482	34.1185	34.079	33.8755	34.0673	34.1497	34.0795	34.061	33.96	33.8366	34.0589	33.899	33.8453	33.9321	33.7011	33.9344
P26039	TLN1_MOUSE	Talin-1 OS=Mus musculus GN=Tln1 PE=1 SV=2	Tln1 Tln	1.70868e+10	1.59138e+10	1.77588e+10	1.84512e+10	1.55239e+10	1.74335e+10	1.7248e+10	1.49161e+10	1.77157e+10	1.68173e+10	1.8355e+10	1.68474e+10	1.70156e+10	1.74651e+10	1.92514e+10	1.71449e+10	1.54758e+10	1.60892e+10	1.61591e+10	1.64478e+10	33.9922	33.8896	34.0478	34.103	33.8538	34.0211	34.0057	33.7962	34.0443	33.9692	34.0955	33.9718	33.9861	34.0238	34.1642	33.9971	33.8493	33.9054	33.9116	33.9372
P19324	SERPH_MOUSE	Serpin H1 OS=Mus musculus GN=Serpinh1 PE=1 SV=3	Serpinh1 Cbp1 Hsp47	1.65433e+10	1.17357e+10	2.09837e+10	1.36922e+10	1.33855e+10	1.69692e+10	9.35643e+09	1.27496e+10	2.06951e+10	1.65287e+10	1.25403e+10	1.99317e+10	1.70277e+10	2.02048e+10	1.76455e+10	1.87337e+10	1.86857e+10	1.36155e+10	1.55848e+10	1.54758e+10	33.9455	33.4502	34.2885	33.6726	33.64	33.9822	33.1233	33.5697	34.2686	33.9443	33.5458	34.2143	33.9872	34.234	34.0386	34.1249	34.1212	33.6645	33.8594	33.8493
Q8CI94	PYGB_MOUSE	Glycogen phosphorylase, brain form OS=Mus musculus GN=Pygb PE=1 SV=3	Pygb	2.09026e+10	1.30424e+10	1.84505e+10	1.56223e+10	1.91047e+10	1.4406e+10	1.52475e+10	1.81907e+10	1.81854e+10	1.12619e+10	1.7961e+10	1.99081e+10	1.60034e+10	1.73377e+10	1.59806e+10	1.58675e+10	1.58397e+10	9.85487e+09	1.84472e+10	9.49996e+09	34.283	33.6025	34.1029	33.8629	34.1532	33.7459	33.8279	34.0825	34.0821	33.3907	34.0641	34.2126	33.8977	34.0132	33.8956	33.8854	33.8828	33.1982	34.1027	33.1453
P53569	CEBPZ_MOUSE	CCAAT/enhancer-binding protein zeta OS=Mus musculus GN=Cebpz PE=2 SV=2	Cebpz Cbf2 Cebpa-rs1	1.30736e+10	1.81265e+10	1.35082e+10	1.71248e+10	1.55111e+10	1.3971e+10	1.23109e+10	1.39791e+10	1.37177e+10	1.54978e+10	1.52887e+10	1.45856e+10	1.42412e+10	1.46557e+10	1.19999e+10	1.53342e+10	1.79286e+10	1.96193e+10	1.8483e+10	1.9609e+10	33.6059	34.0774	33.6531	33.9954	33.8526	33.7017	33.5192	33.7025	33.6753	33.8513	33.8317	33.7638	33.7294	33.7707	33.4823	33.836	34.0615	34.1916	34.1055	34.1908
Q80UM3	NAA15_MOUSE	N-alpha-acetyltransferase 15, NatA auxiliary subunit OS=Mus musculus GN=Naa15 PE=1 SV=1	Naa15 Narg1 Nat1 Tbdn-1 Tubedown	1.48039e+10	1.44806e+10	1.58624e+10	1.28907e+10	1.2691e+10	1.44565e+10	1.27518e+10	1.19797e+10	1.4167e+10	1.34215e+10	1.24573e+10	1.61525e+10	1.48251e+10	1.54628e+10	1.54175e+10	1.59113e+10	1.28476e+10	1.43607e+10	1.12902e+10	1.80199e+10	33.7853	33.7534	33.8849	33.5856	33.5631	33.751	33.57	33.4799	33.7218	33.6438	33.5363	33.911	33.7873	33.8481	33.8438	33.8893	33.5808	33.7414	33.3943	34.0689
Q8K1E6	ALKB3_MOUSE	Alpha-ketoglutarate-dependent dioxygenase alkB homolog 3 OS=Mus musculus GN=Alkbh3 PE=1 SV=1	Alkbh3 Abh3	1.66531e+10	1.41211e+10	1.63819e+10	1.57221e+10	1.38157e+10	1.18261e+10	1.23658e+10	1.28944e+10	1.24472e+10	1.01644e+10	1.48907e+10	1.47627e+10	1.55699e+10	1.36058e+10	1.37513e+10	1.31508e+10	1.65682e+10	1.00684e+10	1.52133e+10	1.00525e+10	33.9551	33.7171	33.9314	33.8721	33.6856	33.4612	33.5256	33.586	33.5351	33.2428	33.7937	33.7812	33.858	33.6635	33.6788	33.6144	33.9477	33.2291	33.8246	33.2268
Q9D5V5	CUL5_MOUSE	Cullin-5 OS=Mus musculus GN=Cul5 PE=1 SV=3	Cul5	1.12766e+10	1.24288e+10	1.23722e+10	1.18436e+10	1.15348e+10	1.39083e+10	1.40523e+10	1.04929e+10	1.47879e+10	1.50855e+10	1.38472e+10	1.23459e+10	1.54377e+10	1.4958e+10	1.60049e+10	1.41873e+10	1.44973e+10	1.60466e+10	1.31699e+10	1.55304e+10	33.3926	33.533	33.5264	33.4634	33.4253	33.6952	33.7101	33.2887	33.7837	33.8124	33.6889	33.5233	33.8457	33.8002	33.8978	33.7239	33.7551	33.9015	33.6165	33.8544
Q61838	A2M_MOUSE	Alpha-2-macroglobulin OS=Mus musculus GN=A2m PE=1 SV=3	Pzp A2m	1.09519e+10	1.03856e+10	1.21124e+10	1.24377e+10	9.06636e+09	1.14883e+10	1.29656e+10	9.21021e+09	1.28926e+10	1.22361e+10	1.48064e+10	1.33128e+10	1.32771e+10	1.71169e+10	2.44755e+10	1.37818e+10	1.0562e+10	1.51693e+10	1.97447e+10	1.24864e+10	33.3505	33.2739	33.4958	33.534	33.0779	33.4194	33.594	33.1006	33.5858	33.5104	33.7855	33.6321	33.6282	33.9947	34.5106	33.682	33.2982	33.8204	34.2007	33.5396
P02535	K1C10_MOUSE	Keratin, type I cytoskeletal 10 OS=Mus musculus GN=Krt10 PE=1 SV=3	Krt10 Krt1-10	1.47368e+10	1.41956e+10	1.42515e+10	1.65532e+10	1.32342e+10	1.5992e+10	1.62328e+10	1.14826e+10	1.37321e+10	1.52229e+10	1.4012e+10	1.25151e+10	1.05003e+10	9.71084e+09	9.95635e+09	1.10623e+10	1.22595e+10	1.15757e+10	8.0381e+09	1.33057e+10	33.7787	33.7247	33.7304	33.9464	33.6236	33.8966	33.9182	33.4187	33.6768	33.8255	33.7059	33.543	33.2897	33.1769	33.213	33.3649	33.5132	33.4304	32.9042	33.6313
Q9DB05	SNAA_MOUSE	Alpha-soluble NSF attachment protein OS=Mus musculus GN=Napa PE=1 SV=1	Napa Snapa	1.16252e+10	1.64042e+10	1.04971e+10	1.68056e+10	1.16989e+10	1.19913e+10	1.32041e+10	7.48978e+09	1.68329e+10	1.75616e+10	1.53921e+10	8.60768e+09	1.2718e+10	1.1177e+10	1.19323e+10	1.28212e+10	1.17703e+10	1.04056e+10	9.68409e+09	1.43171e+10	33.4365	33.9333	33.2893	33.9682	33.4456	33.4813	33.6203	32.8023	33.9706	34.0317	33.8415	33.003	33.5662	33.3798	33.4742	33.5778	33.4544	33.2766	33.173	33.737
A2ASQ1	AGRIN_MOUSE	Agrin OS=Mus musculus GN=Agrn PE=1 SV=1	Agrn Agrin	1.0835e+10	1.16183e+10	1.21369e+10	1.14929e+10	1.05488e+10	1.04986e+10	1.11582e+10	9.03381e+09	1.06859e+10	1.08592e+10	1.19328e+10	1.15427e+10	1.05313e+10	1.14591e+10	1.18957e+10	1.18285e+10	1.23974e+10	1.31258e+10	1.27056e+10	1.20218e+10	33.335	33.4357	33.4987	33.42	33.2964	33.2895	33.3774	33.0727	33.315	33.3382	33.4742	33.4263	33.294	33.4158	33.4697	33.4615	33.5293	33.6117	33.5647	33.4849
P62983	RS27A_MOUSE	Ubiquitin-40S ribosomal protein S27a OS=Mus musculus GN=Rps27a PE=1 SV=2	Rps27a Uba80 Ubcep1	7.71219e+09	1.21103e+10	7.03472e+09	9.50914e+09	1.21625e+10	1.02886e+10	1.15189e+10	9.89623e+09	1.27045e+10	1.43579e+10	1.35802e+10	8.96016e+09	1.058e+10	8.69908e+09	8.90122e+09	7.5102e+09	1.38622e+10	1.10609e+10	1.42073e+10	1.34574e+10	32.8445	33.4955	32.7118	33.1467	33.5017	33.2603	33.4233	33.2042	33.5646	33.7411	33.6608	33.0609	33.3006	33.0182	33.0514	32.8062	33.6904	33.3647	33.7259	33.6477
P97298	PEDF_MOUSE	Pigment epithelium-derived factor OS=Mus musculus GN=Serpinf1 PE=1 SV=2	Serpinf1 Pedf Sdf3	1.05487e+10	8.70126e+09	1.08788e+10	1.01534e+10	9.09974e+09	1.0026e+10	9.85127e+09	8.18531e+09	1.14044e+10	1.02601e+10	1.09648e+10	1.15654e+10	1.10323e+10	1.1202e+10	1.13285e+10	1.11146e+10	1.09152e+10	8.78954e+09	1.01763e+10	1.0484e+10	33.2964	33.0186	33.3408	33.2412	33.0832	33.223	33.1977	32.9304	33.4089	33.2563	33.3522	33.4291	33.361	33.383	33.3992	33.3717	33.3456	33.0331	33.2445	33.2875
Q80U72	SCRIB_MOUSE	Protein scribble homolog OS=Mus musculus GN=Scrib PE=1 SV=2	Scrib Kiaa0147 Lap4 Scrib1	1.15938e+10	1.01514e+10	1.17858e+10	9.51716e+09	9.47849e+09	9.92622e+09	7.21852e+09	8.88476e+09	1.06056e+10	9.18785e+09	8.38673e+09	1.10311e+10	1.1692e+10	1.0771e+10	9.57337e+09	1.08809e+10	1.13225e+10	8.29185e+09	9.71152e+09	9.08265e+09	33.4326	33.241	33.4563	33.1479	33.142	33.2086	32.7491	33.0487	33.3041	33.0971	32.9655	33.3609	33.4448	33.3264	33.1564	33.3411	33.3985	32.949	33.177	33.0805
Q61656	DDX5_MOUSE	Probable ATP-dependent RNA helicase DDX5 OS=Mus musculus GN=Ddx5 PE=1 SV=2	Ddx5 Tnz2	1.27252e+10	7.43707e+09	1.15166e+10	1.16e+10	8.55271e+09	8.40286e+09	5.18468e+09	7.80622e+09	8.76543e+09	6.8507e+09	8.31278e+09	1.3057e+10	1.09066e+10	1.14345e+10	7.78682e+09	1.20794e+10	1.3488e+10	1.01169e+10	1.10283e+10	1.19723e+10	33.567	32.7921	33.423	33.4334	32.9937	32.9682	32.2716	32.862	33.0292	32.6736	32.9527	33.6041	33.3445	33.4127	32.8584	33.4918	33.651	33.236	33.3605	33.479
Q61703	ITIH2_MOUSE	Inter-alpha-trypsin inhibitor heavy chain H2 OS=Mus musculus GN=Itih2 PE=1 SV=1	Itih2	9.68758e+09	1.08533e+10	1.04497e+10	1.0594e+10	8.58883e+09	9.68643e+09	9.80146e+09	9.12801e+09	9.70506e+09	9.99624e+09	9.36599e+09	9.46737e+09	9.17162e+09	9.2314e+09	9.86387e+09	9.52516e+09	9.53764e+09	1.08444e+10	9.61347e+09	1.04064e+10	33.1735	33.3374	33.2827	33.3025	32.9998	33.1733	33.1903	33.0877	33.1761	33.2187	33.1248	33.1403	33.0945	33.1039	33.1995	33.1491	33.151	33.3362	33.1624	33.2768
P0C6F1	DYH2_MOUSE	Dynein heavy chain 2, axonemal OS=Mus musculus GN=Dnah2 PE=2 SV=1	Dnah2 Dnahc2	1.06029e+10	1.1312e+10	9.33362e+09	1.16238e+10	8.82086e+09	6.85906e+09	5.70502e+09	8.27338e+09	8.51427e+09	8.31079e+09	8.01141e+09	1.01844e+10	9.23997e+09	9.03103e+09	7.17073e+09	9.27365e+09	9.40467e+09	1.26607e+10	1.0614e+10	1.39138e+10	33.3037	33.3971	33.1198	33.4364	33.0383	32.6754	32.4096	32.9458	32.9872	32.9523	32.8994	33.2456	33.1052	33.0722	32.7395	33.1105	33.1307	33.5596	33.3053	33.6958
O35988	SDC4_MOUSE	Syndecan-4 OS=Mus musculus GN=Sdc4 PE=1 SV=1	Sdc4	1.25333e+10	5.80286e+09	1.35203e+10	1.01651e+10	7.26074e+09	8.22027e+09	5.90194e+09	6.0666e+09	9.88141e+09	6.77544e+09	9.1082e+09	1.241e+10	1.18795e+10	1.18425e+10	1.0904e+10	1.10185e+10	1.12195e+10	6.57683e+09	9.75905e+09	7.35905e+09	33.545	32.4341	33.6544	33.2429	32.7575	32.9365	32.4585	32.4982	33.2021	32.6577	33.0845	33.5308	33.4678	33.4633	33.3441	33.3592	33.3853	32.6147	33.1841	32.7769
Q9JHU4	DYHC1_MOUSE	Cytoplasmic dynein 1 heavy chain 1 OS=Mus musculus GN=Dync1h1 PE=1 SV=2	Dync1h1 Dhc1 Dnch1 Dnchc1 Dyhc	8.59691e+09	9.08083e+09	8.83874e+09	9.31705e+09	8.54759e+09	8.50788e+09	8.69554e+09	7.9814e+09	9.50031e+09	8.99118e+09	9.30632e+09	8.01641e+09	9.35187e+09	8.97885e+09	9.02304e+09	9.10134e+09	8.54956e+09	8.36808e+09	8.32494e+09	8.88088e+09	33.0012	33.0802	33.0412	33.1172	32.9929	32.9862	33.0176	32.894	33.1453	33.0659	33.1156	32.9003	33.1226	33.0639	33.071	33.0834	32.9932	32.9622	32.9548	33.0481
Q9ES97	RTN3_MOUSE	Reticulon-3 OS=Mus musculus GN=Rtn3 PE=1 SV=2	Rtn3	9.72596e+09	4.91842e+09	8.31524e+09	7.97124e+09	7.27229e+09	7.09942e+09	5.6603e+09	6.4597e+09	1.03638e+10	6.31771e+09	7.90238e+09	1.04597e+10	1.25967e+10	1.00361e+10	9.71164e+09	1.04356e+10	1.11856e+10	3.41733e+09	8.214e+09	5.79281e+09	33.1792	32.1955	32.9531	32.8922	32.7598	32.7251	32.3982	32.5888	33.2708	32.5568	32.8796	33.2841	33.5523	33.2245	33.1771	33.2808	33.3809	31.6702	32.9354	32.4316
P84228	H32_MOUSE	Histone H3.2 OS=Mus musculus GN=Hist1h3b PE=1 SV=2	H3c2 H3-53 H3.2 H3b Hist1h3b; H3c3 H3-143 Hist1h3c; H3c4 H3-B Hist1h3d; H3c6 H3-F Hist1h3e; H3c7 H3.2-221 H3f Hist1h3f; H3c13 H3.2-616 Hist2h3b; H3c14 H3.2-615 Hist2h3c1 Hist2h3ca1; H3c15 H3.2-614 Hist2h3c2 Hist2h3ca2	3.36081e+09	4.58714e+09	2.02089e+09	4.04575e+09	6.15393e+09	4.51657e+09	6.73217e+09	6.62508e+09	6.305e+09	8.665e+09	6.73256e+09	5.42265e+09	4.09845e+09	6.20713e+09	3.5541e+09	5.34785e+09	2.21744e+10	1.82074e+10	2.01817e+10	1.83072e+10	31.6462	32.0949	30.9123	31.9138	32.5189	32.0726	32.6484	32.6253	32.5538	33.0126	32.6485	32.3364	31.9324	32.5313	31.7268	32.3163	34.3682	34.0838	34.2323	34.0917
A2AJA9	CI172_MOUSE	Uncharacterized protein C9orf172 homolog OS=Mus musculus GN=Gm996 PE=1 SV=1	Ajm1 Gm996	9.41814e+09	5.89971e+09	8.28247e+09	6.81282e+09	5.8968e+09	5.87355e+09	6.19781e+09	6.13127e+09	7.77581e+09	7.11465e+09	7.52362e+09	9.36711e+09	7.9402e+09	9.65165e+09	9.26252e+09	8.60229e+09	8.94357e+09	9.98158e+09	1.32932e+10	8.85927e+09	33.1328	32.458	32.9474	32.6656	32.4573	32.4516	32.5291	32.5135	32.8563	32.7281	32.8088	33.125	32.8865	33.1681	33.1088	33.0021	33.0582	33.2166	33.63	33.0445
Q00623	APOA1_MOUSE	Apolipoprotein A-I OS=Mus musculus GN=Apoa1 PE=1 SV=2	Apoa1	7.64735e+09	1.0966e+10	7.69386e+09	8.08426e+09	9.579e+09	8.62958e+09	9.01463e+09	9.70323e+09	7.26028e+09	8.1385e+09	6.97769e+09	6.39468e+09	7.6364e+09	6.58834e+09	6.18932e+09	6.95712e+09	7.57518e+09	8.24355e+09	6.99896e+09	8.04776e+09	32.8323	33.3523	32.8411	32.9125	33.1572	33.0066	33.0696	33.1758	32.7574	32.9221	32.7001	32.5742	32.8302	32.6173	32.5271	32.6958	32.8186	32.9406	32.7045	32.9059
Q02788	CO6A2_MOUSE	Collagen alpha-2(VI) chain OS=Mus musculus GN=Col6a2 PE=2 SV=3	Col6a2	9.01538e+09	6.16326e+09	9.98782e+09	7.60688e+09	6.24557e+09	7.55009e+09	5.88501e+09	6.42003e+09	7.95542e+09	8.22849e+09	9.24327e+09	8.95153e+09	7.51387e+09	8.08144e+09	9.59218e+09	8.15114e+09	7.47946e+09	4.97854e+09	8.29849e+09	4.95294e+09	33.0697	32.521	33.2175	32.8247	32.5402	32.8138	32.4544	32.5799	32.8893	32.938	33.1058	33.0595	32.8069	32.912	33.1592	32.9244	32.8003	32.2131	32.9502	32.2056
O88783	FA5_MOUSE	Coagulation factor V OS=Mus musculus GN=F5 PE=1 SV=1	F5	7.97651e+09	7.91887e+09	7.83609e+09	8.13117e+09	6.76278e+09	7.4384e+09	6.97262e+09	6.32151e+09	7.65678e+09	7.60813e+09	8.2492e+09	7.28722e+09	8.6489e+09	7.70018e+09	8.58451e+09	7.46635e+09	8.10611e+09	6.31457e+09	7.67949e+09	7.29701e+09	32.8931	32.8826	32.8675	32.9208	32.655	32.7923	32.6991	32.5576	32.8341	32.8249	32.9416	32.7627	33.0099	32.8422	32.9991	32.7978	32.9164	32.556	32.8384	32.7647
Q91ZX7	LRP1_MOUSE	Prolow-density lipoprotein receptor-related protein 1 OS=Mus musculus GN=Lrp1 PE=1 SV=1	Lrp1 A2mr	7.88604e+09	7.5438e+09	8.25826e+09	8.06538e+09	6.9826e+09	7.34172e+09	6.82167e+09	6.40028e+09	7.25827e+09	6.96522e+09	7.43471e+09	7.73407e+09	7.30648e+09	8.29813e+09	8.28706e+09	8.14643e+09	7.20556e+09	7.15601e+09	7.59555e+09	7.2502e+09	32.8767	32.8126	32.9432	32.9091	32.7011	32.7735	32.6675	32.5755	32.757	32.6975	32.7916	32.8486	32.7665	32.9501	32.9482	32.9235	32.7465	32.7365	32.8225	32.7554
Q14BI2	GRM2_MOUSE	Metabotropic glutamate receptor 2 OS=Mus musculus GN=Grm2 PE=2 SV=2	Grm2 Gprc1b Mglur2	8.17371e+09	7.36176e+09	8.76854e+09	7.3919e+09	6.1942e+09	7.94393e+09	6.35765e+09	5.94445e+09	6.88954e+09	7.28203e+09	6.96549e+09	9.05762e+09	7.18169e+09	8.63197e+09	8.65548e+09	8.16867e+09	7.86008e+09	6.74231e+09	6.92573e+09	6.47679e+09	32.9283	32.7774	33.0297	32.7833	32.5283	32.8872	32.5658	32.4689	32.6818	32.7617	32.6976	33.0765	32.7417	33.007	33.011	32.9275	32.8719	32.6506	32.6893	32.5926
Q76KF0	SEM6D_MOUSE	Semaphorin-6D OS=Mus musculus GN=Sema6d PE=2 SV=1	Sema6d Kiaa1479	6.26716e+09	9.75964e+09	6.27331e+09	8.34521e+09	8.05261e+09	7.03341e+09	6.11885e+09	6.80858e+09	5.98487e+09	7.24611e+09	7.45345e+09	6.33495e+09	6.35302e+09	6.79403e+09	5.80623e+09	7.15505e+09	8.69583e+09	1.02708e+10	8.73409e+09	8.97387e+09	32.5452	33.1842	32.5466	32.9583	32.9068	32.7116	32.5106	32.6647	32.4787	32.7546	32.7953	32.5607	32.5648	32.6616	32.435	32.7363	33.0177	33.2578	33.024	33.0631
P0DM40	FR1L5_MOUSE	Fer-1-like protein 5 OS=Mus musculus GN=Fer1l5 PE=1 SV=1	Fer1l5	7.47236e+09	5.86451e+09	8.23417e+09	7.32343e+09	6.22183e+09	7.18722e+09	5.35599e+09	5.55893e+09	8.07171e+09	7.50085e+09	8.0127e+09	8.24724e+09	8.40574e+09	8.42933e+09	8.50373e+09	8.01163e+09	8.29023e+09	5.66595e+09	7.40571e+09	7.40616e+09	32.7989	32.4494	32.939	32.7699	32.5347	32.7428	32.3185	32.3722	32.9102	32.8044	32.8996	32.9413	32.9687	32.9728	32.9854	32.8994	32.9488	32.3997	32.786	32.7861
Q80XI3	IF4G3_MOUSE	Eukaryotic translation initiation factor 4 gamma 3 OS=Mus musculus GN=Eif4g3 PE=1 SV=2	Eif4g3	7.13762e+09	1.00963e+10	7.15302e+09	1.04164e+10	8.33075e+09	8.60973e+09	8.45264e+09	8.19092e+09	6.69591e+09	8.7182e+09	6.25373e+09	6.99988e+09	7.57951e+09	5.77716e+09	4.62424e+09	6.96636e+09	4.21854e+09	8.61871e+09	5.31934e+09	6.87165e+09	32.7328	33.2331	32.7359	33.2781	32.9558	33.0033	32.9768	32.9314	32.6406	33.0214	32.5421	32.7047	32.8195	32.4277	32.1066	32.6978	31.9741	33.0048	32.3086	32.678
Q9R0E1	PLOD3_MOUSE	Procollagen-lysine,2-oxoglutarate 5-dioxygenase 3 OS=Mus musculus GN=Plod3 PE=1 SV=1	Plod3	6.83567e+09	7.44185e+09	6.94017e+09	6.61247e+09	6.59873e+09	7.29648e+09	8.05569e+09	6.45411e+09	8.33809e+09	7.28899e+09	6.0645e+09	7.03014e+09	6.28478e+09	7.13358e+09	7.06835e+09	9.24502e+09	5.71155e+09	9.58519e+09	6.36872e+09	1.04664e+10	32.6704	32.793	32.6923	32.6225	32.6195	32.7646	32.9074	32.5876	32.9571	32.7631	32.4977	32.7109	32.5492	32.732	32.7187	33.106	32.4112	33.1582	32.5684	33.285
B7ZNG0	KIF7_MOUSE	Kinesin-like protein KIF7 OS=Mus musculus GN=Kif7 PE=1 SV=1	Kif7	6.97403e+09	8.95025e+09	7.16409e+09	6.91233e+09	8.7305e+09	7.38214e+09	5.52842e+09	7.01053e+09	6.67641e+09	7.44406e+09	7.53219e+09	6.59771e+09	6.55682e+09	6.90141e+09	5.59508e+09	7.48424e+09	8.71329e+09	8.26706e+09	7.83636e+09	8.44122e+09	32.6993	33.0593	32.7381	32.6865	33.0234	32.7814	32.3642	32.7069	32.6364	32.7934	32.8104	32.6193	32.6103	32.6842	32.3815	32.8012	33.0206	32.9447	32.8675	32.9748
Q9EPK7	XPO7_MOUSE	Exportin-7 OS=Mus musculus GN=Xpo7 PE=2 SV=3	Xpo7 Kiaa0745 Ranbp16	6.41585e+09	7.03381e+09	7.20723e+09	1.00609e+10	6.42317e+09	6.6283e+09	8.84763e+09	6.029e+09	7.36329e+09	7.59291e+09	9.50112e+09	5.82668e+09	6.38495e+09	5.61468e+09	8.13946e+09	5.8616e+09	6.71172e+09	7.73227e+09	8.10475e+09	7.53298e+09	32.579	32.7117	32.7468	33.228	32.5806	32.626	33.0426	32.4893	32.7777	32.822	33.1455	32.44	32.572	32.3866	32.9223	32.4486	32.644	32.8482	32.9161	32.8106
Q61687	ATRX_MOUSE	Transcriptional regulator ATRX OS=Mus musculus GN=Atrx PE=1 SV=3	Atrx Hp1bp2 Xnp	7.2687e+09	7.09249e+09	8.21276e+09	7.32213e+09	6.21922e+09	7.76758e+09	7.00518e+09	5.23911e+09	7.6895e+09	7.44546e+09	6.95327e+09	7.6024e+09	6.87211e+09	8.1115e+09	7.92977e+09	7.66762e+09	6.83175e+09	6.49833e+09	6.88296e+09	7.23053e+09	32.7591	32.7236	32.9352	32.7696	32.5341	32.8548	32.7058	32.2867	32.8402	32.7937	32.695	32.8238	32.6781	32.9173	32.8846	32.8361	32.6696	32.5974	32.6804	32.7515
A2ASS6	TITIN_MOUSE	Titin OS=Mus musculus GN=Ttn PE=1 SV=1	Ttn	7.57757e+09	8.71896e+09	6.82747e+09	7.32474e+09	7.00963e+09	6.34536e+09	5.97252e+09	7.77635e+09	6.22041e+09	7.15172e+09	6.54076e+09	6.92242e+09	6.71645e+09	6.84293e+09	6.00138e+09	7.04679e+09	7.04632e+09	7.56254e+09	6.70973e+09	7.92539e+09	32.8191	33.0215	32.6687	32.7701	32.7067	32.5631	32.4757	32.8564	32.5344	32.7356	32.6068	32.6886	32.6451	32.672	32.4826	32.7143	32.7142	32.8162	32.6436	32.8838
P04186	CFAB_MOUSE	Complement factor B OS=Mus musculus GN=Cfb PE=1 SV=2	Cfb Bf H2-Bf	6.16969e+09	5.73836e+09	6.57632e+09	7.15161e+09	5.60441e+09	6.28534e+09	6.67489e+09	5.08725e+09	7.44641e+09	7.41521e+09	7.58784e+09	6.75843e+09	6.82953e+09	7.93619e+09	9.28312e+09	7.38774e+09	5.94079e+09	7.2422e+09	7.63669e+09	7.31224e+09	32.5226	32.418	32.6146	32.7356	32.3839	32.5493	32.6361	32.2442	32.7939	32.7878	32.821	32.654	32.6691	32.8858	33.112	32.7825	32.468	32.7538	32.8303	32.7677
E9PZQ0	RYR1_MOUSE	Ryanodine receptor 1 OS=Mus musculus GN=Ryr1 PE=1 SV=1	Ryr1	6.52752e+09	6.59044e+09	7.21891e+09	6.44416e+09	7.19759e+09	7.68438e+09	7.40235e+09	7.32663e+09	6.94269e+09	7.43717e+09	7.57737e+09	6.32378e+09	6.35923e+09	6.08825e+09	6.89142e+09	6.7079e+09	6.39511e+09	7.01286e+09	6.37438e+09	6.54787e+09	32.6039	32.6177	32.7491	32.5853	32.7449	32.8393	32.7853	32.7705	32.6928	32.7921	32.8191	32.5581	32.5662	32.5034	32.6822	32.6432	32.5743	32.7074	32.5696	32.6084
P68033	ACTC_MOUSE	Actin, alpha cardiac muscle 1 OS=Mus musculus GN=Actc1 PE=1 SV=1	Actc1 Actc	6.86265e+09	6.0662e+09	7.04981e+09	6.24137e+09	5.92582e+09	6.99932e+09	5.90001e+09	6.71476e+09	7.61595e+09	6.7888e+09	6.73393e+09	7.75715e+09	6.83753e+09	6.91567e+09	7.14888e+09	6.90491e+09	7.14067e+09	5.84392e+09	7.4401e+09	6.96065e+09	32.6761	32.4981	32.7149	32.5392	32.4644	32.7046	32.4581	32.6447	32.8264	32.6605	32.6488	32.8529	32.6708	32.6872	32.7351	32.685	32.7334	32.4443	32.7927	32.6966
Q61316	HSP74_MOUSE	Heat shock 70 kDa protein 4 OS=Mus musculus GN=Hspa4 PE=1 SV=1	Hspa4 Apg2 Hsp110	5.66933e+09	6.40142e+09	5.92726e+09	6.43785e+09	6.06347e+09	7.58633e+09	7.78119e+09	5.98991e+09	6.4511e+09	7.4212e+09	7.01711e+09	6.1382e+09	6.91311e+09	6.92084e+09	7.39789e+09	6.69854e+09	6.5486e+09	6.50341e+09	7.34643e+09	7.17345e+09	32.4005	32.5757	32.4647	32.5839	32.4975	32.8208	32.8573	32.4799	32.5869	32.789	32.7082	32.5152	32.6867	32.6883	32.7845	32.6412	32.6085	32.5985	32.7744	32.74
Q7SIG6	ASAP2_MOUSE	Arf-GAP with SH3 domain, ANK repeat and PH domain-containing protein 2 OS=Mus musculus GN=Asap2 PE=1 SV=3	Asap2 Ddef2 Gm1523 Gm592	6.4395e+09	4.18524e+09	7.17782e+09	4.92803e+09	7.10148e+09	9.39137e+09	4.418e+09	6.85598e+09	1.15593e+10	6.15643e+09	4.12077e+09	7.91033e+09	6.8815e+09	7.21463e+09	5.79177e+09	7.66241e+09	7.90186e+09	2.84258e+09	5.83677e+09	5.05914e+09	32.5843	31.9627	32.7409	32.1984	32.7255	33.1287	32.0407	32.6747	33.4283	32.5194	31.9403	32.8811	32.6801	32.7483	32.4314	32.8352	32.8795	31.4046	32.4425	32.2362
Q8BLN6	UNC80_MOUSE	Protein unc-80 homolog OS=Mus musculus GN=Unc80 PE=1 SV=2	Unc80 Kiaa1843	7.2017e+09	6.66548e+09	6.48681e+09	6.61152e+09	8.64173e+09	7.00736e+09	5.71122e+09	7.86652e+09	6.53358e+09	6.28532e+09	5.73272e+09	5.86523e+09	5.96054e+09	5.74938e+09	5.19686e+09	5.81766e+09	6.12471e+09	5.08672e+09	5.69752e+09	6.37867e+09	32.7457	32.6341	32.5949	32.6223	33.0087	32.7062	32.4112	32.8731	32.6052	32.5493	32.4166	32.4495	32.4728	32.4208	32.275	32.4378	32.512	32.2441	32.4077	32.5706
Q9ES30	C1QT3_MOUSE	Complement C1q tumor necrosis factor-related protein 3 OS=Mus musculus GN=C1qtnf3 PE=2 SV=1	C1qtnf3 Cors26 Ctrp3	6.35864e+09	7.54279e+09	6.63292e+09	4.48433e+09	6.97132e+09	6.52971e+09	3.6693e+09	8.76281e+09	5.11854e+09	7.50084e+09	4.56344e+09	5.97946e+09	5.57052e+09	6.84815e+09	3.87682e+09	6.74115e+09	6.95311e+09	6.69275e+09	5.22438e+09	6.7132e+09	32.5661	32.8125	32.627	32.0622	32.6988	32.6044	31.7729	33.0287	32.2531	32.8044	32.0875	32.4774	32.3752	32.6731	31.8522	32.6503	32.695	32.64	32.2826	32.6444
Q60864	STIP1_MOUSE	Stress-induced-phosphoprotein 1 OS=Mus musculus GN=Stip1 PE=1 SV=1	Stip1	6.64839e+09	6.67353e+09	6.40005e+09	7.61702e+09	5.15834e+09	5.04654e+09	5.71819e+09	4.13607e+09	7.91416e+09	7.76841e+09	7.68631e+09	5.62271e+09	6.3447e+09	5.77465e+09	6.48554e+09	5.30065e+09	5.4355e+09	5.13336e+09	6.27556e+09	5.48445e+09	32.6304	32.6358	32.5754	32.8266	32.2643	32.2326	32.4129	31.9456	32.8818	32.855	32.8396	32.3886	32.5629	32.4271	32.5946	32.3035	32.3398	32.2573	32.5471	32.3527
Q05860	FMN1_MOUSE	Formin-1 OS=Mus musculus GN=Fmn1 PE=1 SV=2	Fmn1 Fmn Ld	1.25075e+10	1.90012e+08	1.40507e+10	4.72777e+09	4.55685e+09	8.96171e+08	8.92125e+08	2.41326e+09	6.15722e+09	7.48632e+07	8.00124e+09	1.39517e+10	7.57496e+09	1.10253e+10	1.13051e+10	7.64627e+09	7.25654e+09	6.1704e+07	7.97563e+09	1.26426e+08	33.5421	27.5015	33.7099	32.1385	32.0854	29.7392	29.7327	31.1683	32.5196	26.1578	32.8976	33.6997	32.8186	33.3601	33.3963	32.8321	32.7566	25.8789	32.893	26.9137
A2ALU4	SHRM2_MOUSE	Protein Shroom2 OS=Mus musculus GN=Shroom2 PE=1 SV=1	Shroom2 Apxl	6.79084e+09	3.3765e+09	7.26855e+09	5.91369e+09	4.94111e+09	5.57288e+09	4.35023e+09	4.5769e+09	6.89918e+09	4.82444e+09	6.79901e+09	7.56084e+09	8.13903e+09	7.87541e+09	8.16664e+09	6.96566e+09	6.79688e+09	3.11718e+09	6.70007e+09	4.74436e+09	32.6609	31.6529	32.759	32.4614	32.2022	32.3758	32.0184	32.0917	32.6838	32.1677	32.6627	32.8159	32.9222	32.8747	32.9271	32.6976	32.6622	31.5376	32.6415	32.1436
Q9CZ91	SRFB1_MOUSE	Serum response factor-binding protein 1 OS=Mus musculus GN=Srfbp1 PE=1 SV=1	Srfbp1	5.61614e+09	6.31007e+09	6.68357e+09	6.37248e+09	7.33486e+09	7.53782e+09	8.48492e+09	7.63121e+09	5.57031e+09	6.17551e+09	6.81199e+09	5.34017e+09	4.08231e+09	5.64147e+09	5.72719e+09	5.53086e+09	3.23691e+09	6.7496e+09	5.56446e+09	4.71524e+09	32.3869	32.555	32.638	32.5692	32.7721	32.8115	32.9823	32.8293	32.3751	32.5239	32.6654	32.3142	31.9267	32.3934	32.4152	32.3649	31.592	32.6522	32.3736	32.1347
Q80ZA4	PKHL1_MOUSE	Fibrocystin-L OS=Mus musculus GN=Pkhd1l1 PE=2 SV=1	Pkhd1l1	5.49496e+09	6.54793e+09	6.36416e+09	7.0905e+09	5.72693e+09	5.74293e+09	4.54574e+09	5.37814e+09	5.60651e+09	5.79581e+09	5.77266e+09	6.35126e+09	5.27603e+09	5.78927e+09	4.61191e+09	6.22037e+09	7.28025e+09	6.78297e+09	7.29922e+09	6.56989e+09	32.3555	32.6084	32.5673	32.7232	32.4151	32.4191	32.0819	32.3245	32.3845	32.4324	32.4266	32.5644	32.2968	32.4307	32.1027	32.5344	32.7613	32.6593	32.7651	32.6132
Q9D5R2	WDR20_MOUSE	WD repeat-containing protein 20 OS=Mus musculus GN=Wdr20 PE=1 SV=1	Wdr20 Wdr20b Wdr20rt	5.86942e+09	7.91311e+09	5.04298e+09	4.7067e+09	5.61507e+09	6.29466e+09	4.78139e+09	6.20258e+09	6.39581e+09	7.35886e+09	4.54237e+09	6.052e+09	8.22867e+09	5.94881e+09	4.48982e+09	6.26777e+09	6.73849e+09	5.77611e+09	3.90728e+09	7.81609e+09	32.4506	32.8816	32.2316	32.1321	32.3867	32.5515	32.1548	32.5302	32.5745	32.7768	32.0808	32.4948	32.938	32.47	32.064	32.5453	32.6498	32.4275	31.8635	32.8638
Q80YX1	TENA_MOUSE	Tenascin OS=Mus musculus GN=Tnc PE=1 SV=1	Tnc Hxb	5.02932e+09	5.46499e+09	5.3526e+09	5.21238e+09	5.05347e+09	5.25271e+09	4.51175e+09	4.62902e+09	5.96667e+09	6.6384e+09	5.80786e+09	5.87301e+09	5.77733e+09	6.11959e+09	6.03152e+09	7.23965e+09	6.86881e+09	7.0083e+09	6.246e+09	6.53536e+09	32.2277	32.3476	32.3176	32.2793	32.2346	32.2904	32.071	32.1081	32.4743	32.6282	32.4354	32.4515	32.4278	32.5108	32.4899	32.7533	32.6774	32.7064	32.5403	32.6056
Q7TPV4	MBB1A_MOUSE	Myb-binding protein 1A OS=Mus musculus GN=Mybbp1a PE=1 SV=2	Mybbp1a P160	5.72844e+09	6.18245e+09	7.22029e+09	7.2971e+09	5.7696e+09	5.43517e+09	5.08913e+09	4.47338e+09	5.84419e+09	5.656e+09	6.47554e+09	5.77548e+09	5.30981e+09	5.39974e+09	5.45134e+09	5.51071e+09	6.48995e+09	5.17228e+09	6.87564e+09	4.00426e+09	32.4155	32.5255	32.7494	32.7647	32.4258	32.3397	32.2448	32.0587	32.4444	32.3971	32.5924	32.4273	32.306	32.3302	32.344	32.3596	32.5956	32.2682	32.6788	31.8989
Q9QVP9	FAK2_MOUSE	Protein-tyrosine kinase 2-beta OS=Mus musculus GN=Ptk2b PE=1 SV=2	Ptk2b Fak2 Pyk2 Raftk	6.26454e+09	6.16107e+09	5.5008e+09	6.29889e+09	7.43696e+09	5.81757e+09	7.4871e+09	7.42889e+09	5.32842e+09	4.55562e+09	6.99047e+09	4.61629e+09	4.15265e+09	5.39976e+09	4.8647e+09	6.09344e+09	2.59211e+09	2.67899e+09	6.80535e+09	5.80254e+09	32.5446	32.5205	32.357	32.5525	32.7921	32.4378	32.8018	32.7905	32.3111	32.085	32.7027	32.1041	31.9514	32.3302	32.1797	32.5046	31.2715	31.319	32.664	32.434
E9PZJ8	ASCC3_MOUSE	Activating signal cointegrator 1 complex subunit 3 OS=Mus musculus GN=Ascc3 PE=2 SV=1	Ascc3	5.51908e+09	5.37362e+09	6.15448e+09	5.42895e+09	5.40922e+09	6.83014e+09	5.60106e+09	5.67573e+09	5.31691e+09	5.71878e+09	5.42147e+09	5.42041e+09	5.98335e+09	5.89578e+09	5.52231e+09	5.15483e+09	6.02309e+09	5.05317e+09	4.75522e+09	5.74413e+09	32.3618	32.3232	32.519	32.338	32.3328	32.6693	32.3831	32.4022	32.3079	32.4131	32.336	32.3358	32.4783	32.457	32.3626	32.2633	32.4879	32.2345	32.1469	32.4194
Q9WV32	ARC1B_MOUSE	Actin-related protein 2/3 complex subunit 1B OS=Mus musculus GN=Arpc1b PE=1 SV=4	Arpc1b	4.92729e+09	6.23436e+09	4.69328e+09	5.5681e+09	5.52994e+09	4.64444e+09	4.70029e+09	4.89066e+09	4.96814e+09	5.24129e+09	5.2067e+09	5.162e+09	5.22713e+09	5.39423e+09	4.49604e+09	5.43427e+09	5.79921e+09	7.62947e+09	6.86181e+09	7.44827e+09	32.1981	32.5376	32.128	32.3745	32.3646	32.1129	32.1301	32.1874	32.2101	32.2873	32.2777	32.2653	32.2834	32.3288	32.066	32.3394	32.4332	32.8289	32.6759	32.7943
Q8BIL5	HOOK1_MOUSE	Protein Hook homolog 1 OS=Mus musculus GN=Hook1 PE=1 SV=2	Hook1	5.4743e+09	5.66489e+09	5.51307e+09	4.9185e+09	5.20472e+09	6.03497e+09	4.90772e+09	4.95956e+09	5.73386e+09	6.3832e+09	5.25349e+09	5.73781e+09	5.86584e+09	5.71822e+09	4.6735e+09	5.69732e+09	5.19627e+09	5.07285e+09	4.37528e+09	5.66833e+09	32.35	32.3994	32.3602	32.1956	32.2772	32.4907	32.1924	32.2076	32.4169	32.5716	32.2906	32.4179	32.4497	32.4129	32.1219	32.4076	32.2748	32.2401	32.0267	32.4003
B9EJA2	CTTB2_MOUSE	Cortactin-binding protein 2 OS=Mus musculus GN=Cttnbp2 PE=1 SV=2	Cttnbp2 Kiaa1758	4.97607e+09	4.66376e+09	5.44789e+09	5.92077e+09	4.8368e+09	5.484e+09	5.16267e+09	4.68773e+09	5.18584e+09	6.0476e+09	5.80492e+09	5.1724e+09	4.93114e+09	5.72749e+09	5.6955e+09	5.28803e+09	4.87032e+09	6.2444e+09	5.74048e+09	5.97477e+09	32.2124	32.1188	32.3431	32.4631	32.1714	32.3526	32.2655	32.1262	32.2719	32.4937	32.4346	32.2682	32.1993	32.4153	32.4072	32.3001	32.1814	32.5399	32.4185	32.4762
P29391	FRIL1_MOUSE	Ferritin light chain 1 OS=Mus musculus GN=Ftl1 PE=1 SV=2	Ftl1 Ftl Ftl-1	6.18181e+09	3.45901e+09	6.84532e+09	5.73064e+09	4.45906e+09	4.06534e+09	3.95814e+09	3.88369e+09	6.63563e+09	4.14968e+09	6.8202e+09	6.0637e+09	6.54128e+09	6.6476e+09	6.23163e+09	5.82993e+09	6.71791e+09	2.82116e+09	6.6473e+09	4.16515e+09	32.5254	31.6877	32.6725	32.416	32.0541	31.9207	31.8822	31.8548	32.6276	31.9504	32.6672	32.4976	32.6069	32.6302	32.537	32.4408	32.6454	31.3936	32.6301	31.9557
Q99JR5	TINAL_MOUSE	Tubulointerstitial nephritis antigen-like OS=Mus musculus GN=Tinagl1 PE=1 SV=1	Tinagl1 Arg1 Lcn7 Tinagl	4.7733e+09	6.30988e+09	5.16079e+09	5.82652e+09	6.4008e+09	5.54972e+09	5.5045e+09	6.26585e+09	4.92908e+09	5.81781e+09	5.49289e+09	4.88235e+09	4.48067e+09	4.93609e+09	4.15115e+09	5.23284e+09	4.84271e+09	5.71716e+09	5.75196e+09	4.82581e+09	32.1523	32.555	32.2649	32.44	32.5756	32.3698	32.358	32.5449	32.1987	32.4378	32.3549	32.1849	32.0611	32.2007	31.9509	32.2849	32.1732	32.4127	32.4214	32.1681
Q9JLC8	SACS_MOUSE	Sacsin OS=Mus musculus GN=Sacs PE=1 SV=2	Sacs Kiaa0730	5.72098e+09	6.10061e+09	5.69053e+09	6.35776e+09	4.24238e+09	4.57158e+09	6.99394e+09	4.03376e+09	3.61763e+09	4.74159e+09	6.87659e+09	5.46234e+09	4.76847e+09	5.14566e+09	6.20612e+09	5.14745e+09	3.97993e+09	5.88665e+09	4.74718e+09	5.83456e+09	32.4136	32.5063	32.4059	32.5659	31.9822	32.09	32.7035	31.9095	31.7524	32.1427	32.679	32.3469	32.1509	32.2607	32.531	32.2612	31.8901	32.4548	32.1444	32.442
P08226	APOE_MOUSE	Apolipoprotein E OS=Mus musculus GN=Apoe PE=1 SV=2	Apoe	5.16887e+09	4.37227e+09	5.73577e+09	5.28421e+09	6.8243e+09	5.97929e+09	7.08091e+09	6.939e+09	4.94162e+09	4.14374e+09	5.29742e+09	5.09611e+09	4.68338e+09	4.64674e+09	5.15243e+09	5.00612e+09	3.74804e+09	4.31074e+09	4.49049e+09	3.94192e+09	32.2672	32.0257	32.4173	32.299	32.668	32.4773	32.7213	32.6921	32.2023	31.9483	32.3026	32.2467	32.1249	32.1136	32.2626	32.221	31.8035	32.0053	32.0642	31.8763
Q148V8	FA83H_MOUSE	Protein FAM83H OS=Mus musculus GN=Fam83h PE=1 SV=1	Fam83h	4.75221e+09	4.92655e+09	4.86182e+09	5.34816e+09	5.39737e+09	4.37204e+09	3.50234e+09	4.38603e+09	4.44359e+09	4.42612e+09	4.9145e+09	5.20229e+09	4.81799e+09	4.9819e+09	4.02551e+09	5.14127e+09	6.7024e+09	4.7431e+09	6.52502e+09	5.22922e+09	32.146	32.1979	32.1788	32.3164	32.3296	32.0257	31.7057	32.0303	32.0491	32.0434	32.1944	32.2765	32.1658	32.214	31.9065	32.2595	32.642	32.1432	32.6033	32.2839
Q9R118	HTRA1_MOUSE	Serine protease HTRA1 OS=Mus musculus GN=Htra1 PE=1 SV=2	Htra1 Htra Prss11	6.04326e+09	6.5293e+09	6.07842e+09	6.35284e+09	4.93942e+09	4.93251e+09	5.15912e+09	5.13603e+09	4.85299e+09	4.9529e+09	4.87626e+09	4.08106e+09	4.68541e+09	3.94528e+09	4.22804e+09	3.87862e+09	3.96611e+09	3.61148e+09	4.0233e+09	4.28928e+09	32.4927	32.6043	32.501	32.5648	32.2017	32.1997	32.2645	32.258	32.1762	32.2056	32.1831	31.9263	32.1255	31.8775	31.9773	31.8529	31.8851	31.7499	31.9057	31.9981
O08808	DIAP1_MOUSE	Protein diaphanous homolog 1 OS=Mus musculus GN=Diaph1 PE=1 SV=1	Diaph1 Diap1	4.47005e+09	4.7021e+09	3.97519e+09	5.14705e+09	6.9079e+09	4.99048e+09	5.06588e+09	8.1129e+09	4.04378e+09	5.28875e+09	5.53517e+09	3.99261e+09	2.32347e+09	3.97604e+09	3.06989e+09	4.70493e+09	2.43641e+09	6.74684e+09	3.56691e+09	6.7612e+09	32.0576	32.1307	31.8884	32.2611	32.6856	32.2165	32.2382	32.9176	31.9131	32.3003	32.366	31.8947	31.1136	31.8887	31.5155	32.1315	31.1821	32.6516	31.732	32.6546
Q61398	PCOC1_MOUSE	Procollagen C-endopeptidase enhancer 1 OS=Mus musculus GN=Pcolce PE=1 SV=2	Pcolce Pcpe1	4.24411e+09	4.22052e+09	4.76266e+09	4.88433e+09	4.38091e+09	5.29622e+09	5.05866e+09	4.24045e+09	4.82029e+09	5.3917e+09	5.15274e+09	4.56221e+09	3.86751e+09	5.14574e+09	5.38358e+09	4.7698e+09	3.68632e+09	5.40931e+09	4.55583e+09	5.31239e+09	31.9828	31.9748	32.1491	32.1855	32.0286	32.3023	32.2361	31.9816	32.1665	32.3281	32.2627	32.0871	31.8488	32.2607	32.3259	32.1513	31.7795	32.3328	32.0851	32.3067
P40124	CAP1_MOUSE	Adenylyl cyclase-associated protein 1 OS=Mus musculus GN=Cap1 PE=1 SV=4	Cap1 Cap	5.54153e+09	4.59932e+09	5.35893e+09	3.59858e+09	4.36704e+09	5.51326e+09	3.99221e+09	4.04528e+09	4.42396e+09	5.14741e+09	3.04927e+09	5.19669e+09	5.03725e+09	5.59649e+09	5.48017e+09	5.32735e+09	5.24713e+09	4.10101e+09	3.7801e+09	3.92125e+09	32.3676	32.0988	32.3193	31.7448	32.024	32.3603	31.8945	31.9136	32.0427	32.2612	31.5058	32.2749	32.23	32.3819	32.3516	32.3108	32.2889	31.9333	31.8158	31.8687
Q9Z0Y2	PA21B_MOUSE	Phospholipase A2 OS=Mus musculus GN=Pla2g1b PE=2 SV=1	Pla2g1b Pla2	3.91271e+09	4.50068e+09	4.21203e+09	4.70175e+09	5.75411e+09	6.13048e+09	7.04843e+09	5.53625e+09	4.31786e+09	4.99965e+09	4.88899e+09	3.65834e+09	3.99693e+09	3.39882e+09	4.04422e+09	3.57032e+09	3.69611e+09	4.61131e+09	3.94214e+09	4.52386e+09	31.8655	32.0675	31.9719	32.1306	32.4219	32.5134	32.7147	32.3663	32.0077	32.2192	32.1869	31.7685	31.8962	31.6624	31.9132	31.7334	31.7834	32.1025	31.8763	32.0749
Q3UHD1	BAI1_MOUSE	Brain-specific angiogenesis inhibitor 1 OS=Mus musculus GN=Bai1 PE=1 SV=1	Adgrb1 Bai1	4.81924e+09	4.96166e+09	4.31835e+09	5.63538e+09	5.51419e+09	4.42909e+09	5.48907e+09	3.92423e+09	5.06847e+09	6.3278e+09	5.19009e+09	4.33161e+09	3.16605e+09	3.33766e+09	3.725e+09	3.7307e+09	3.12802e+09	5.03788e+09	4.42776e+09	4.13902e+09	32.1662	32.2082	32.0078	32.3919	32.3605	32.0444	32.3539	31.8698	32.2389	32.5591	32.2731	32.0123	31.56	31.6362	31.7946	31.7968	31.5426	32.2302	32.0439	31.9466
P17879	HS71B_MOUSE	Heat shock 70 kDa protein 1B OS=Mus musculus GN=Hspa1b PE=1 SV=3	Hspa1b Hcp70.1 Hsp70-1 Hsp70a1 Hspa1	4.42485e+09	3.88954e+09	4.28884e+09	4.28673e+09	4.28171e+09	4.40492e+09	4.10516e+09	4.03923e+09	4.90329e+09	4.49102e+09	4.67985e+09	4.62401e+09	5.00729e+09	4.96931e+09	4.97976e+09	4.8128e+09	4.56694e+09	3.90257e+09	4.65653e+09	4.48942e+09	32.043	31.857	31.9979	31.9972	31.9955	32.0365	31.9348	31.9114	32.1911	32.0644	32.1238	32.1065	32.2214	32.2104	32.2134	32.1642	32.0886	31.8618	32.1166	32.0639
Q8VDD5	MYH9_MOUSE	Myosin-9 OS=Mus musculus GN=Myh9 PE=1 SV=4	Myh9	4.53195e+09	4.93508e+09	4.34558e+09	4.59956e+09	4.15709e+09	4.00618e+09	4.44e+09	4.47319e+09	4.33407e+09	4.17279e+09	4.46482e+09	4.14741e+09	4.4921e+09	4.38268e+09	4.58724e+09	4.3867e+09	4.27102e+09	4.3884e+09	4.43286e+09	4.38245e+09	32.0775	32.2004	32.0169	32.0989	31.9529	31.8996	32.0479	32.0587	32.0131	31.9584	32.056	31.9496	32.0647	32.0292	32.095	32.0305	31.9919	32.031	32.0456	32.0291
Q9D709	TMM79_MOUSE	Transmembrane protein 79 OS=Mus musculus GN=Tmem79 PE=2 SV=1	Tmem79 Matt	5.85016e+09	2.35232e+09	5.97103e+09	4.18278e+09	3.68377e+09	3.76455e+09	2.98744e+09	3.39764e+09	5.23094e+09	2.66402e+09	4.92566e+09	6.16535e+09	5.38426e+09	6.17778e+09	5.31908e+09	5.18813e+09	4.50546e+09	1.72427e+09	4.50165e+09	2.5505e+09	32.4458	31.1314	32.4753	31.9618	31.7785	31.8098	31.4763	31.6619	32.2844	31.311	32.1977	32.5215	32.3261	32.5244	32.3085	32.2726	32.069	30.6833	32.0678	31.2481
Q499E5	STOX2_MOUSE	Storkhead-box protein 2 OS=Mus musculus GN=Stox2 PE=2 SV=2	Stox2 Kiaa1392	3.61936e+09	4.14653e+09	3.61246e+09	3.23136e+09	3.7368e+09	4.23498e+09	4.06045e+09	3.5797e+09	4.31855e+09	4.63479e+09	4.24853e+09	4.46096e+09	4.4236e+09	4.83273e+09	4.54657e+09	4.46137e+09	4.62995e+09	4.30687e+09	4.10719e+09	4.88577e+09	31.7531	31.9493	31.7503	31.5895	31.7992	31.9797	31.919	31.7372	32.0079	32.1099	31.9843	32.0547	32.0426	32.1702	32.0821	32.0548	32.1084	32.004	31.9355	32.1859
Q60841	RELN_MOUSE	Reelin OS=Mus musculus GN=Reln PE=1 SV=3	Reln Rl	4.53171e+09	4.16028e+09	4.94369e+09	4.53892e+09	3.74243e+09	3.95637e+09	4.08301e+09	3.24958e+09	4.36665e+09	4.23001e+09	4.52096e+09	4.44534e+09	4.11863e+09	4.18715e+09	4.7109e+09	4.08877e+09	4.03762e+09	3.75847e+09	4.18422e+09	3.90744e+09	32.0774	31.954	32.2029	32.0797	31.8013	31.8815	31.927	31.5976	32.0239	31.978	32.074	32.0496	31.9395	31.9633	32.1334	31.929	31.9109	31.8075	31.9623	31.8636
Q78ZA7	NP1L4_MOUSE	Nucleosome assembly protein 1-like 4 OS=Mus musculus GN=Nap1l4 PE=1 SV=1	Nap1l4	4.02205e+09	5.74689e+09	4.05223e+09	4.17572e+09	4.89839e+09	4.4343e+09	4.56958e+09	5.08764e+09	3.92722e+09	4.24651e+09	3.62964e+09	3.55077e+09	4.03582e+09	3.48219e+09	3.2602e+09	3.69986e+09	4.04864e+09	4.04903e+09	3.65361e+09	4.14488e+09	31.9053	32.4201	31.9161	31.9594	32.1897	32.0461	32.0894	32.2444	31.8709	31.9836	31.7572	31.7255	31.9102	31.6973	31.6023	31.7848	31.9148	31.9149	31.7667	31.9487
Q9DCH4	EIF3F_MOUSE	Eukaryotic translation initiation factor 3 subunit F OS=Mus musculus GN=Eif3f PE=1 SV=2	Eif3f Eif3s5	4.85621e+09	2.09615e+09	4.66855e+09	3.33721e+09	2.93456e+09	3.45257e+09	3.20056e+09	2.71763e+09	3.789e+09	2.42228e+09	4.03631e+09	5.7957e+09	4.84501e+09	5.23752e+09	6.95784e+09	4.62588e+09	4.99746e+09	2.11469e+09	4.62808e+09	2.67962e+09	32.1772	30.9651	32.1203	31.636	31.4505	31.685	31.5757	31.3397	31.8192	31.1737	31.9104	32.4323	32.1739	32.2862	32.696	32.1071	32.2185	30.9778	32.1078	31.3194
Q6IR34	GPSM1_MOUSE	G-protein-signaling modulator 1 OS=Mus musculus GN=Gpsm1 PE=1 SV=3	Gpsm1 Ags3 C10a	3.56749e+09	3.87979e+09	3.70414e+09	3.92025e+09	3.25934e+09	3.68133e+09	3.27524e+09	2.84669e+09	4.04023e+09	4.17784e+09	3.93984e+09	3.7618e+09	4.0889e+09	4.29234e+09	4.29815e+09	3.47356e+09	4.24968e+09	3.04015e+09	4.21615e+09	3.68727e+09	31.7323	31.8533	31.7865	31.8683	31.6019	31.7776	31.609	31.4066	31.9118	31.9601	31.8755	31.8088	31.9291	31.9991	32.0011	31.6938	31.9847	31.5015	31.9733	31.7799
A2AQ07	TBB1_MOUSE	Tubulin beta-1 chain OS=Mus musculus GN=Tubb1 PE=1 SV=1	Tubb1	3.49899e+09	3.03942e+09	3.2873e+09	3.56951e+09	3.88585e+09	3.42423e+09	3.35389e+09	3.37047e+09	4.44431e+09	3.75034e+09	4.20804e+09	3.58548e+09	4.24093e+09	4.20436e+09	4.20357e+09	4.13972e+09	3.78691e+09	3.14311e+09	3.85049e+09	3.41761e+09	31.7043	31.5012	31.6143	31.7331	31.8556	31.6731	31.6432	31.6503	32.0493	31.8044	31.9705	31.7395	31.9817	31.9692	31.969	31.9469	31.8184	31.5495	31.8424	31.6703
Q8R1K1	UBAC2_MOUSE	Ubiquitin-associated domain-containing protein 2 OS=Mus musculus GN=Ubac2 PE=2 SV=1	Ubac2 Phgdhl1	3.0827e+09	3.18795e+09	3.35213e+09	3.3499e+09	3.36116e+09	3.86636e+09	4.1834e+09	3.44197e+09	3.71056e+09	3.77751e+09	3.83329e+09	3.3855e+09	3.9594e+09	3.89841e+09	4.3175e+09	3.75332e+09	3.6875e+09	4.03405e+09	3.89507e+09	3.92974e+09	31.5215	31.57	31.6424	31.6415	31.6463	31.8483	31.962	31.6806	31.789	31.8148	31.8359	31.6567	31.8826	31.8602	32.0075	31.8055	31.78	31.9096	31.859	31.8718
Q32P12	CQ053_MOUSE	Uncharacterized protein C17orf53 homolog OS=Mus musculus PE=2 SV=2	Hrob	4.07004e+09	2.12552e+09	4.28751e+09	2.77327e+09	2.38371e+09	4.17557e+09	2.24904e+09	3.50597e+09	4.54361e+09	3.83527e+09	3.31947e+09	4.69815e+09	4.66282e+09	3.42704e+09	5.17681e+09	4.5685e+09	4.87182e+09	2.64503e+09	3.24802e+09	2.87096e+09	31.9224	30.9852	31.9975	31.3689	31.1506	31.9593	31.0667	31.7072	32.0812	31.8367	31.6283	32.1294	32.1186	31.6743	32.2694	32.0891	32.1818	31.3006	31.5969	31.4189
P11370	ENV2_MOUSE	Retrovirus-related Env polyprotein from Fv-4 locus OS=Mus musculus GN=Fv4 PE=1 SV=2	Fv4 Env	2.58184e+09	2.61468e+09	1.68637e+09	2.30847e+09	5.06791e+09	3.59612e+09	3.46093e+09	3.70314e+09	2.28965e+09	2.21908e+09	2.08347e+09	1.88276e+09	1.70352e+09	1.65101e+09	1.31743e+09	1.52325e+09	8.86506e+09	5.96102e+09	1.08958e+10	7.91833e+09	31.2658	31.284	30.6513	31.1043	32.2387	31.7438	31.6885	31.7861	31.0925	31.0473	30.9563	30.8102	30.6659	30.6207	30.2951	30.5045	33.0455	32.4729	33.3431	32.8825
B2RXS4	PLXB2_MOUSE	Plexin-B2 OS=Mus musculus GN=Plxnb2 PE=1 SV=1	Plxnb2	3.20121e+09	4.14686e+09	3.06663e+09	3.4966e+09	3.96252e+09	3.02602e+09	2.8988e+09	3.48523e+09	3.62452e+09	3.85633e+09	3.63488e+09	3.8183e+09	3.15894e+09	3.44369e+09	2.63664e+09	3.50514e+09	4.07264e+09	4.81287e+09	4.21451e+09	4.55623e+09	31.576	31.9494	31.514	31.7033	31.8838	31.4948	31.4328	31.6986	31.7551	31.8446	31.7593	31.8303	31.5568	31.6813	31.2961	31.7068	31.9233	32.1643	31.9727	32.0852
O55131	SEPT7_MOUSE	Septin-7 OS=Mus musculus GN=Sept7 PE=1 SV=1	Septin7 Cdc10 Sept7	3.76108e+09	2.89562e+09	4.24683e+09	3.469e+09	3.3241e+09	3.01978e+09	2.95822e+09	2.88018e+09	4.47569e+09	3.73562e+09	4.97178e+09	3.80194e+09	4.01388e+09	3.58543e+09	3.65795e+09	3.68515e+09	4.27238e+09	2.60192e+09	3.85482e+09	3.39645e+09	31.8085	31.4312	31.9837	31.6919	31.6303	31.4918	31.4621	31.4235	32.0595	31.7987	32.2111	31.8241	31.9023	31.7395	31.7684	31.7791	31.9924	31.2769	31.844	31.6614
Q9JII6	AK1A1_MOUSE	Alcohol dehydrogenase [NADP(+)] OS=Mus musculus GN=Akr1a1 PE=1 SV=3	Akr1a1 Akr1a4	3.63392e+09	2.97482e+09	3.98115e+09	3.81288e+09	3.06354e+09	3.42805e+09	3.11735e+09	2.89755e+09	4.01908e+09	3.41046e+09	4.04039e+09	3.79277e+09	4.06525e+09	4.25083e+09	4.05215e+09	3.95508e+09	3.63767e+09	2.81914e+09	3.69261e+09	3.33712e+09	31.7589	31.4702	31.8905	31.8282	31.5126	31.6747	31.5377	31.4322	31.9042	31.6673	31.9118	31.8206	31.9207	31.9851	31.916	31.8811	31.7604	31.3926	31.782	31.636
Q3UPF5	ZCCHV_MOUSE	Zinc finger CCCH-type antiviral protein 1 OS=Mus musculus GN=Zc3hav1 PE=1 SV=1	Zc3hav1	3.41467e+09	1.68173e+09	5.70154e+09	2.98505e+09	3.03111e+09	3.57248e+09	4.46704e+09	1.35758e+09	3.8596e+09	2.43709e+09	5.58251e+09	4.21125e+09	3.59699e+09	3.79051e+09	6.68779e+09	3.25853e+09	3.68148e+09	1.81031e+09	4.55381e+09	1.93048e+09	31.6691	30.6473	32.4087	31.4751	31.4972	31.7343	32.0567	30.3384	31.8458	31.1825	32.3783	31.9716	31.7441	31.8197	32.6389	31.6016	31.7776	30.7536	32.0844	30.8463
Q9ET01	PYGL_MOUSE	Glycogen phosphorylase, liver form OS=Mus musculus GN=Pygl PE=1 SV=4	Pygl	3.28982e+09	3.16849e+09	3.45042e+09	3.3743e+09	3.12737e+09	3.37009e+09	3.43184e+09	3.05123e+09	3.69569e+09	3.81592e+09	4.1356e+09	3.5753e+09	3.64394e+09	3.53654e+09	4.66052e+09	3.65587e+09	3.15025e+09	3.35233e+09	3.5805e+09	3.47825e+09	31.6154	31.5612	31.6841	31.6519	31.5423	31.6501	31.6763	31.5067	31.7832	31.8294	31.9454	31.7354	31.7629	31.7197	32.1178	31.7676	31.5528	31.6425	31.7375	31.6957
Q60715	P4HA1_MOUSE	Prolyl 4-hydroxylase subunit alpha-1 OS=Mus musculus GN=P4ha1 PE=2 SV=2	P4ha1	3.37906e+09	3.87578e+09	3.5408e+09	3.11316e+09	3.14473e+09	3.49306e+09	3.22835e+09	2.87467e+09	3.21697e+09	3.11779e+09	3.31326e+09	3.38603e+09	3.51627e+09	4.02039e+09	4.45593e+09	3.30168e+09	3.77012e+09	3.51704e+09	3.8179e+09	3.57086e+09	31.654	31.8518	31.7214	31.5357	31.5503	31.7018	31.5881	31.4207	31.5831	31.5379	31.6256	31.6569	31.7114	31.9047	32.0531	31.6206	31.812	31.7117	31.8301	31.7336
Q69ZK6	JHD2C_MOUSE	Probable JmjC domain-containing histone demethylation protein 2C OS=Mus musculus GN=Jmjd1c PE=1 SV=3	Jmjd1c Jhdm2c Kiaa1380	3.27382e+09	4.26151e+09	2.78139e+09	3.98017e+09	3.71981e+09	3.1653e+09	2.72206e+09	2.91203e+09	3.1934e+09	3.50028e+09	3.33282e+09	3.14073e+09	2.92206e+09	3.33712e+09	2.79165e+09	3.62234e+09	3.5709e+09	4.13742e+09	3.91542e+09	4.68389e+09	31.6083	31.9887	31.3732	31.8902	31.7926	31.5597	31.342	31.4394	31.5724	31.7048	31.6341	31.5485	31.4443	31.636	31.3785	31.7543	31.7336	31.9461	31.8665	32.1251
Q99JN2	KLH22_MOUSE	Kelch-like protein 22 OS=Mus musculus GN=Klhl22 PE=1 SV=1	Klhl22	4.84172e+09	2.25917e+09	4.714e+09	4.08018e+09	4.43626e+09	2.80036e+09	1.8637e+09	2.84015e+09	3.47214e+09	1.85735e+09	3.72543e+09	4.76638e+09	4.37496e+09	3.7861e+09	2.91574e+09	4.04041e+09	3.81639e+09	1.45241e+09	4.12403e+09	1.17906e+09	32.1729	31.0731	32.1343	31.926	32.0467	31.383	30.7955	31.4033	31.6932	30.7906	31.7948	32.1502	32.0266	31.8181	31.4412	31.9119	31.8296	30.4358	31.9414	30.135
P11087	CO1A1_MOUSE	Collagen alpha-1(I) chain OS=Mus musculus GN=Col1a1 PE=1 SV=4	Col1a1 Cola1	3.97894e+09	2.46554e+09	3.57718e+09	3.20365e+09	2.95451e+09	2.90852e+09	2.85465e+09	3.25299e+09	3.01559e+09	2.62844e+09	3.19339e+09	3.42052e+09	4.07216e+09	4.08916e+09	4.08547e+09	3.98854e+09	4.13318e+09	2.48523e+09	3.73691e+09	3.07388e+09	31.8897	31.1993	31.7362	31.5771	31.4603	31.4376	31.4107	31.5991	31.4898	31.2916	31.5724	31.6716	31.9231	31.9292	31.9279	31.8932	31.9446	31.2107	31.7992	31.5174
Q7TMY8	HUWE1_MOUSE	E3 ubiquitin-protein ligase HUWE1 OS=Mus musculus GN=Huwe1 PE=1 SV=5	Huwe1 Kiaa0312 Ureb1	3.77352e+09	2.98874e+09	3.69804e+09	3.2737e+09	2.90179e+09	3.21773e+09	2.90607e+09	3.03847e+09	3.52224e+09	2.98971e+09	3.10458e+09	3.69625e+09	3.91976e+09	3.77571e+09	3.65783e+09	3.65814e+09	3.46841e+09	2.58036e+09	2.92434e+09	3.21884e+09	31.8133	31.4769	31.7841	31.6083	31.4343	31.5834	31.4364	31.5007	31.7138	31.4774	31.5317	31.7834	31.8681	31.8141	31.7683	31.7685	31.6916	31.2649	31.4455	31.5839
Q62470	ITA3_MOUSE	Integrin alpha-3 OS=Mus musculus GN=Itga3 PE=1 SV=1	Itga3	2.0942e+09	2.33502e+09	1.73601e+09	2.20394e+09	3.87741e+09	3.34307e+09	3.89394e+09	4.17911e+09	3.46975e+09	4.11224e+09	3.60768e+09	3.93329e+09	3.19481e+09	2.58807e+09	2.65825e+09	2.22628e+09	4.87707e+09	3.55685e+09	4.12658e+09	4.18851e+09	30.9638	31.1208	30.6931	31.0374	31.8524	31.6385	31.8586	31.9605	31.6922	31.9373	31.7484	31.8731	31.5731	31.2692	31.3078	31.052	32.1834	31.728	31.9423	31.9638
Q5QNQ6	OSBP2_MOUSE	Oxysterol-binding protein 2 OS=Mus musculus GN=Osbp2 PE=2 SV=1	Osbp2	3.09206e+09	4.24871e+09	2.65877e+09	3.23603e+09	4.39689e+09	2.82367e+09	4.17828e+09	3.69019e+09	3.31285e+09	3.7138e+09	3.62961e+09	2.58032e+09	3.10363e+09	2.4832e+09	2.53003e+09	2.722e+09	2.91748e+09	4.23873e+09	3.11026e+09	3.4973e+09	31.5259	31.9844	31.3081	31.5916	32.0338	31.3949	31.9603	31.781	31.6254	31.7902	31.7572	31.2649	31.5313	31.2096	31.2365	31.342	31.4421	31.981	31.5344	31.7036
Q8VCM7	FIBG_MOUSE	Fibrinogen gamma chain OS=Mus musculus GN=Fgg PE=2 SV=1	Fgg	3.06495e+09	3.09642e+09	3.24179e+09	3.16394e+09	2.59678e+09	3.01698e+09	2.90476e+09	2.8733e+09	3.44665e+09	3.4682e+09	3.49859e+09	3.34557e+09	3.61924e+09	3.59775e+09	3.71869e+09	3.38432e+09	3.31473e+09	3.51076e+09	3.26901e+09	3.22398e+09	31.5132	31.528	31.5941	31.5591	31.2741	31.4905	31.4358	31.4201	31.6825	31.6915	31.7041	31.6396	31.753	31.7444	31.7921	31.6562	31.6262	31.7091	31.6062	31.5862
P70428	EXT2_MOUSE	Exostosin-2 OS=Mus musculus GN=Ext2 PE=1 SV=2	Ext2	2.96013e+09	4.01662e+09	3.255e+09	3.53203e+09	3.27044e+09	2.974e+09	2.96734e+09	2.88861e+09	3.01701e+09	3.04026e+09	3.33878e+09	2.89479e+09	3.1211e+09	3.07719e+09	2.68296e+09	3.35034e+09	2.98391e+09	4.59554e+09	3.17424e+09	4.10322e+09	31.463	31.9033	31.6	31.7178	31.6068	31.4698	31.4665	31.4277	31.4905	31.5015	31.6367	31.4308	31.5394	31.519	31.3212	31.6417	31.4746	32.0976	31.5638	31.9341
Q8R0Y6	AL1L1_MOUSE	Cytosolic 10-formyltetrahydrofolate dehydrogenase OS=Mus musculus GN=Aldh1l1 PE=2 SV=1	Aldh1l1 Fthfd	3.35179e+09	3.13897e+09	3.47102e+09	3.35402e+09	2.83835e+09	3.21799e+09	2.92009e+09	2.88607e+09	3.5112e+09	3.28127e+09	3.37447e+09	3.39342e+09	3.63381e+09	3.58836e+09	3.6445e+09	3.53098e+09	3.16551e+09	2.8327e+09	2.9785e+09	3.07817e+09	31.6423	31.5476	31.6927	31.6432	31.4024	31.5835	31.4434	31.4265	31.7093	31.6116	31.652	31.6601	31.7588	31.7407	31.7631	31.7174	31.5598	31.3995	31.4719	31.5194
Q8VCB3	GYS2_MOUSE	Glycogen [starch] synthase, liver OS=Mus musculus GN=Gys2 PE=1 SV=2	Gys2	2.67408e+09	3.56669e+09	3.1727e+09	3.5735e+09	3.74247e+09	2.94521e+09	2.79713e+09	3.25328e+09	2.81834e+09	3.29022e+09	3.52719e+09	2.81067e+09	2.53638e+09	2.94433e+09	2.86674e+09	3.02636e+09	3.18258e+09	4.76435e+09	3.78546e+09	3.62575e+09	31.3164	31.7319	31.5631	31.7347	31.8013	31.4557	31.3813	31.5992	31.3922	31.6155	31.7159	31.3883	31.2401	31.4553	31.4168	31.4949	31.5675	32.1496	31.8178	31.7556
P49429	HPPD_MOUSE	4-hydroxyphenylpyruvate dioxygenase OS=Mus musculus GN=Hpd PE=1 SV=3	Hpd	3.78596e+09	6.72985e+09	1.84109e+09	1.6422e+09	2.6395e+09	3.76669e+09	1.92035e+09	2.90991e+09	3.15461e+09	3.09361e+09	1.15825e+09	3.40185e+09	4.99319e+09	2.7421e+09	2.6316e+09	2.73461e+09	7.03154e+09	2.96716e+09	1.40746e+09	4.18538e+09	31.818	32.6479	30.7779	30.613	31.2976	31.8107	30.8387	31.4383	31.5548	31.5266	30.1093	31.6637	32.2173	31.3526	31.2933	31.3487	32.7112	31.4664	30.3904	31.9627
Q8K0E8	FIBB_MOUSE	Fibrinogen beta chain OS=Mus musculus GN=Fgb PE=2 SV=1	Fgb	2.88334e+09	2.58108e+09	3.3556e+09	3.28069e+09	2.76451e+09	2.95127e+09	3.1092e+09	2.68991e+09	3.63797e+09	3.21698e+09	3.52561e+09	3.24341e+09	2.98666e+09	3.8244e+09	3.87483e+09	3.79836e+09	2.63897e+09	3.30432e+09	3.48184e+09	3.20965e+09	31.4251	31.2653	31.6439	31.6114	31.3644	31.4587	31.5339	31.3249	31.7605	31.5831	31.7152	31.5949	31.4759	31.8326	31.8515	31.8227	31.2973	31.6217	31.6972	31.5798
Q9QZH3	PPIE_MOUSE	Peptidyl-prolyl cis-trans isomerase E OS=Mus musculus GN=Ppie PE=2 SV=2	Ppie Cyp33	2.6726e+09	2.86545e+09	2.74955e+09	3.09142e+09	3.34285e+09	3.44593e+09	3.66325e+09	3.09694e+09	3.46233e+09	4.03683e+09	3.90644e+09	2.9237e+09	3.05307e+09	3.00679e+09	3.41033e+09	2.89511e+09	2.82316e+09	3.51207e+09	3.12748e+09	3.20196e+09	31.3156	31.4161	31.3566	31.5256	31.6384	31.6822	31.7705	31.5282	31.6891	31.9106	31.8632	31.4451	31.5076	31.4856	31.6673	31.431	31.3947	31.7097	31.5424	31.5763
P04104	K2C1_MOUSE	Keratin, type II cytoskeletal 1 OS=Mus musculus GN=Krt1 PE=1 SV=4	Krt1 Krt2-1	6.63448e+09	3.0776e+09	1.53621e+09	5.58031e+09	3.0115e+09	5.36946e+09	4.47765e+09	4.9777e+09	3.19947e+09	3.1318e+09	1.85965e+09	3.05763e+09	1.82666e+09	3.83087e+09	1.92699e+09	1.04297e+09	2.05566e+09	2.46297e+09	1.66015e+09	2.51681e+09	32.6273	31.5192	30.5167	32.3777	31.4878	32.3221	32.0601	32.2128	31.5752	31.5443	30.7924	31.5098	30.7666	31.835	30.8437	29.958	30.937	31.1978	30.6287	31.229
P06869	UROK_MOUSE	Urokinase-type plasminogen activator OS=Mus musculus GN=Plau PE=1 SV=1	Plau	1.04332e+09	1.02951e+09	1.04723e+09	1.00916e+09	2.27199e+09	2.5389e+09	2.77173e+09	2.50768e+09	4.69327e+09	5.03356e+09	4.58728e+09	6.33274e+09	2.73408e+09	3.1071e+09	3.44364e+09	3.1632e+09	3.67821e+09	3.61581e+09	3.74157e+09	3.41083e+09	29.9585	29.9393	29.9639	29.9105	31.0813	31.2416	31.3681	31.2237	32.1279	32.2289	32.095	32.5602	31.3484	31.5329	31.6813	31.5587	31.7764	31.7517	31.801	31.6675
P42232	STA5B_MOUSE	Signal transducer and activator of transcription 5B OS=Mus musculus GN=Stat5b PE=1 SV=1	Stat5b	3.11928e+09	2.94311e+09	3.19308e+09	2.90128e+09	2.39876e+09	2.96211e+09	2.24005e+09	2.07214e+09	3.75232e+09	3.39097e+09	3.12097e+09	3.2912e+09	3.31542e+09	3.39649e+09	3.41222e+09	3.3449e+09	3.25863e+09	3.19966e+09	2.8095e+09	3.2645e+09	31.5386	31.4547	31.5723	31.434	31.1596	31.464	31.0609	30.9485	31.8051	31.6591	31.5393	31.616	31.6265	31.6614	31.6681	31.6393	31.6016	31.5753	31.3877	31.6042
Q70E20	SNED1_MOUSE	Sushi, nidogen and EGF-like domain-containing protein 1 OS=Mus musculus GN=Sned1 PE=2 SV=2	Sned1 Snep	3.71891e+09	1.88933e+09	3.7321e+09	3.08742e+09	2.51687e+09	2.68966e+09	2.55473e+09	2.1742e+09	3.02293e+09	2.30288e+09	2.93737e+09	3.76396e+09	3.39832e+09	3.51964e+09	3.88916e+09	3.67347e+09	3.49681e+09	2.18026e+09	3.10073e+09	2.67397e+09	31.7922	30.8152	31.7973	31.5238	31.229	31.3248	31.2505	31.0178	31.4933	31.1008	31.4519	31.8096	31.6622	31.7128	31.8568	31.7745	31.7034	31.0219	31.53	31.3163
Q8K1M6	DNM1L_MOUSE	Dynamin-1-like protein OS=Mus musculus GN=Dnm1l PE=1 SV=2	Dnm1l Drp1	4.18206e+09	3.68777e+09	3.02786e+09	1.7993e+09	2.684e+09	2.10825e+09	1.11123e+09	2.77299e+09	3.5119e+09	2.28583e+09	1.80346e+09	4.24675e+09	5.36881e+09	2.69215e+09	2.0032e+09	3.38168e+09	6.32349e+09	1.55714e+09	2.07551e+09	2.76888e+09	31.9616	31.7801	31.4957	30.7448	31.3217	30.9734	30.0495	31.3688	31.7096	31.0901	30.7481	31.9837	32.322	31.3261	30.8997	31.6551	32.5581	30.5362	30.9508	31.3667
Q61704	ITIH3_MOUSE	Inter-alpha-trypsin inhibitor heavy chain H3 OS=Mus musculus GN=Itih3 PE=1 SV=3	Itih3	2.77232e+09	3.07215e+09	3.06636e+09	3.03271e+09	2.84014e+09	3.00962e+09	2.86324e+09	2.71262e+09	2.77575e+09	3.05693e+09	2.93885e+09	2.87331e+09	2.76759e+09	2.9663e+09	3.19793e+09	2.97461e+09	2.74824e+09	3.38453e+09	3.11016e+09	3.14011e+09	31.3684	31.5166	31.5139	31.498	31.4033	31.4869	31.415	31.337	31.3702	31.5094	31.4526	31.4201	31.366	31.466	31.5745	31.4701	31.3559	31.6563	31.5343	31.5482
Q684R7	FREM1_MOUSE	FRAS1-related extracellular matrix protein 1 OS=Mus musculus GN=Frem1 PE=1 SV=1	Frem1	2.57659e+09	2.77431e+09	2.81982e+09	2.84103e+09	2.62571e+09	3.03833e+09	3.08835e+09	2.47644e+09	2.97441e+09	3.1617e+09	3.20739e+09	2.93826e+09	2.89849e+09	2.4689e+09	2.98928e+09	2.84188e+09	2.97616e+09	2.80363e+09	2.46501e+09	2.93091e+09	31.2628	31.3695	31.393	31.4038	31.2901	31.5006	31.5242	31.2056	31.47	31.5581	31.5788	31.4523	31.4327	31.2012	31.4772	31.4042	31.4708	31.3846	31.1989	31.4487
Q80Z19	MUC2_MOUSE	Mucin-2 (Fragments) OS=Mus musculus GN=Muc2 PE=1 SV=2	Muc2	2.94041e+09	3.36866e+09	2.73578e+09	2.98722e+09	3.52041e+09	2.88787e+09	2.83267e+09	3.30003e+09	2.77633e+09	2.58308e+09	2.56186e+09	2.49231e+09	2.74178e+09	2.56352e+09	2.50318e+09	2.53423e+09	2.72859e+09	2.26424e+09	2.55784e+09	2.75428e+09	31.4534	31.6495	31.3493	31.4762	31.7131	31.4274	31.3995	31.6198	31.3705	31.2664	31.2545	31.2148	31.3525	31.2555	31.2211	31.2389	31.3455	31.0764	31.2523	31.359
Q8K297	GT251_MOUSE	Procollagen galactosyltransferase 1 OS=Mus musculus GN=Colgalt1 PE=1 SV=2	Colgalt1 Glt25d1	4.2027e+09	2.00989e+09	3.21452e+09	2.2042e+09	3.06434e+09	1.53057e+09	2.50196e+09	3.33554e+09	3.48359e+09	1.00641e+09	3.43763e+09	4.52056e+09	4.54665e+09	2.86589e+09	3.35789e+09	2.60993e+09	2.63654e+09	1.21521e+09	2.38512e+09	1.08498e+09	31.9687	30.9045	31.582	31.0376	31.5129	30.5114	31.2204	31.6353	31.6979	29.9066	31.6788	32.0739	32.0822	31.4163	31.6449	31.2814	31.296	30.1786	31.1514	30.015
P40237	CD82_MOUSE	CD82 antigen OS=Mus musculus GN=Cd82 PE=1 SV=1	Cd82 Kai1	2.57114e+09	2.43185e+09	2.79675e+09	2.55471e+09	2.40368e+09	2.95807e+09	2.69517e+09	2.46137e+09	2.87031e+09	3.07538e+09	2.80783e+09	3.88813e+09	2.4846e+09	2.50366e+09	2.50444e+09	2.60986e+09	2.76064e+09	2.76576e+09	2.70352e+09	3.19693e+09	31.2598	31.1794	31.3811	31.2505	31.1626	31.462	31.3277	31.1968	31.4186	31.5181	31.3868	31.8564	31.2104	31.2214	31.2218	31.2813	31.3624	31.365	31.3322	31.574
A6X935	ITIH4_MOUSE	Inter alpha-trypsin inhibitor, heavy chain 4 OS=Mus musculus GN=Itih4 PE=1 SV=2	Itih4	2.91395e+09	2.93993e+09	2.98369e+09	2.89681e+09	2.4422e+09	2.67267e+09	2.61354e+09	2.44152e+09	2.65808e+09	3.17641e+09	2.96371e+09	3.08762e+09	2.66184e+09	2.47464e+09	2.61367e+09	2.87822e+09	2.83502e+09	2.86782e+09	2.38413e+09	2.47141e+09	31.4403	31.4531	31.4744	31.4318	31.1855	31.3156	31.2834	31.1851	31.3077	31.5647	31.4648	31.5238	31.3098	31.2046	31.2834	31.4225	31.4007	31.4173	31.1508	31.2027
Q61789	LAMA3_MOUSE	Laminin subunit alpha-3 OS=Mus musculus GN=Lama3 PE=1 SV=3	Lama3	2.33743e+09	2.62177e+09	1.99049e+09	1.55962e+09	3.20923e+09	2.75526e+09	2.45655e+09	3.38908e+09	3.11358e+09	2.8102e+09	1.95881e+09	3.17897e+09	2.59145e+09	2.46472e+09	1.51135e+09	2.95193e+09	3.82618e+09	3.17445e+09	2.94598e+09	3.87804e+09	31.1223	31.2879	30.8905	30.5385	31.5796	31.3595	31.194	31.6582	31.5359	31.388	30.8673	31.5659	31.2711	31.1988	30.4932	31.459	31.8333	31.5639	31.4561	31.8527
P29341	PABP1_MOUSE	Polyadenylate-binding protein 1 OS=Mus musculus GN=Pabpc1 PE=1 SV=2	Pabpc1 Pabp1	2.3032e+09	2.51892e+09	1.78209e+09	2.22976e+09	3.34837e+09	2.84781e+09	2.68852e+09	2.90921e+09	2.8675e+09	2.85204e+09	2.67451e+09	2.43282e+09	2.55302e+09	2.33602e+09	2.28479e+09	2.16013e+09	3.48309e+09	3.11198e+09	3.82905e+09	3.42476e+09	31.101	31.2302	30.7309	31.0542	31.6408	31.4072	31.3242	31.438	31.4171	31.4093	31.3166	31.18	31.2496	31.1214	31.0894	31.0085	31.6977	31.5352	31.8343	31.6734
P42859	HD_MOUSE	Huntingtin OS=Mus musculus GN=Htt PE=1 SV=2	Htt Hd Hdh	1.88928e+09	2.31749e+09	1.0035e+09	2.00242e+09	3.44177e+09	2.75307e+09	2.76112e+09	2.69259e+09	2.67726e+09	2.93999e+09	2.4426e+09	1.90372e+09	2.69472e+09	2.15014e+09	1.93662e+09	1.78574e+09	3.55004e+09	3.68412e+09	4.85201e+09	4.27056e+09	30.8152	31.1099	29.9024	30.8991	31.6805	31.3584	31.3626	31.3263	31.3181	31.4532	31.1858	30.8262	31.3275	31.0018	30.8509	30.7339	31.7252	31.7787	32.1759	31.9918
O89051	ITM2B_MOUSE	Integral membrane protein 2B OS=Mus musculus GN=Itm2b PE=2 SV=1	Itm2b	2.91542e+09	2.20068e+09	4.19559e+09	2.58433e+09	2.37517e+09	2.96768e+09	2.49096e+09	2.01755e+09	2.39887e+09	2.51401e+09	3.01743e+09	3.28012e+09	2.23486e+09	2.71267e+09	3.47353e+09	2.76654e+09	2.80589e+09	1.94249e+09	2.75154e+09	1.53383e+09	31.4411	31.0353	31.9662	31.2671	31.1454	31.4667	31.2141	30.91	31.1597	31.2273	31.4907	31.6111	31.0575	31.3371	31.6938	31.3654	31.3858	30.8553	31.3576	30.5145
B2RY04	DOCK5_MOUSE	Dedicator of cytokinesis protein 5 OS=Mus musculus GN=Dock5 PE=1 SV=2	Dock5 Lr2 Rlc	2.63088e+09	2.42146e+09	2.38269e+09	2.52996e+09	2.30316e+09	2.33643e+09	2.46005e+09	2.14691e+09	3.08732e+09	2.68313e+09	2.85303e+09	2.75708e+09	2.96018e+09	2.81451e+09	3.0598e+09	2.72418e+09	2.81567e+09	2.53399e+09	2.77087e+09	2.79062e+09	31.2929	31.1732	31.1499	31.2365	31.101	31.1217	31.196	30.9996	31.5237	31.3213	31.4098	31.3605	31.463	31.3902	31.5108	31.3432	31.3908	31.2388	31.3677	31.3779
Q9D0F9	PGM1_MOUSE	Phosphoglucomutase-1 OS=Mus musculus GN=Pgm1 PE=1 SV=4	Pgm1 Pgm2	2.69548e+09	2.65877e+09	2.94398e+09	2.71933e+09	2.50224e+09	2.84633e+09	2.60802e+09	2.37909e+09	2.69512e+09	2.56856e+09	2.80758e+09	2.61311e+09	2.75045e+09	2.73223e+09	2.95274e+09	2.73043e+09	2.46438e+09	2.39771e+09	2.23346e+09	2.46856e+09	31.3279	31.3081	31.4551	31.3406	31.2206	31.4065	31.2803	31.1478	31.3277	31.2583	31.3867	31.2831	31.357	31.3474	31.4594	31.3465	31.1986	31.159	31.0566	31.201
E9Q401	RYR2_MOUSE	Ryanodine receptor 2 OS=Mus musculus GN=Ryr2 PE=1 SV=1	Ryr2	2.9242e+09	3.50633e+09	3.01582e+09	2.2831e+09	2.96091e+09	2.7733e+09	1.14698e+09	2.69947e+09	2.34182e+09	2.79907e+09	2.2429e+09	2.69348e+09	2.62877e+09	2.59172e+09	1.95665e+09	2.9337e+09	3.72265e+09	2.52178e+09	2.52604e+09	2.47173e+09	31.4454	31.7073	31.4899	31.0883	31.4634	31.369	30.0952	31.33	31.125	31.3823	31.0627	31.3268	31.2917	31.2713	30.8657	31.4501	31.7937	31.2318	31.2342	31.2029
Q811L6	MAST4_MOUSE	Microtubule-associated serine/threonine-protein kinase 4 OS=Mus musculus GN=Mast4 PE=1 SV=3	Mast4	2.80968e+09	2.63573e+09	3.22984e+09	2.53879e+09	2.16658e+09	2.77689e+09	2.39842e+09	2.01912e+09	2.50941e+09	2.65518e+09	2.4208e+09	2.96174e+09	2.46557e+09	2.95781e+09	2.98299e+09	2.7316e+09	2.48629e+09	2.59485e+09	2.40897e+09	2.57981e+09	31.3878	31.2956	31.5888	31.2415	31.0128	31.3708	31.1594	30.9111	31.2247	31.3062	31.1728	31.4638	31.1993	31.4619	31.4741	31.3471	31.2113	31.273	31.1658	31.2646
P63154	CRNL1_MOUSE	Crooked neck-like protein 1 OS=Mus musculus GN=Crnkl1 PE=2 SV=1	Crnkl1	2.25511e+09	2.46053e+09	2.25756e+09	2.32813e+09	2.3365e+09	2.45215e+09	2.73729e+09	2.18129e+09	2.61392e+09	2.72018e+09	2.91278e+09	2.20879e+09	2.92815e+09	2.72552e+09	3.02152e+09	2.63053e+09	2.80873e+09	2.86737e+09	2.69907e+09	2.87352e+09	31.0705	31.1963	31.0721	31.1165	31.1217	31.1914	31.3501	31.0225	31.2836	31.3411	31.4397	31.0406	31.4473	31.3439	31.4926	31.2927	31.3873	31.4171	31.3298	31.4202
Q6ZWX6	IF2A_MOUSE	Eukaryotic translation initiation factor 2 subunit 1 OS=Mus musculus GN=Eif2s1 PE=1 SV=3	Eif2s1 Eif2a	2.45187e+09	2.60522e+09	2.73163e+09	2.81848e+09	2.21076e+09	2.41623e+09	2.67944e+09	2.15893e+09	2.52391e+09	2.4462e+09	2.92457e+09	2.72647e+09	2.58178e+09	2.73789e+09	2.72239e+09	2.67963e+09	2.55339e+09	2.79615e+09	2.6108e+09	2.61719e+09	31.1912	31.2788	31.3471	31.3923	31.0419	31.1701	31.3193	31.0077	31.233	31.1879	31.4456	31.3444	31.2657	31.3504	31.3422	31.3194	31.2498	31.3808	31.2818	31.2854
E9Q414	APOB_MOUSE	Apolipoprotein B-100 OS=Mus musculus GN=Apob PE=1 SV=1	Apob	2.76528e+09	2.8928e+09	2.93325e+09	2.6286e+09	2.31485e+09	2.71308e+09	2.67462e+09	2.49e+09	2.48356e+09	2.53959e+09	2.39614e+09	2.83565e+09	2.49706e+09	2.59656e+09	2.57421e+09	2.71645e+09	2.41195e+09	2.53875e+09	2.24207e+09	2.60854e+09	31.3648	31.4298	31.4499	31.2916	31.1083	31.3373	31.3167	31.2135	31.2098	31.2419	31.1581	31.401	31.2176	31.274	31.2615	31.3391	31.1676	31.2415	31.0622	31.2806
P28271	ACOC_MOUSE	Cytoplasmic aconitate hydratase OS=Mus musculus GN=Aco1 PE=1 SV=3	Aco1 Ireb1 Irebp	2.78647e+09	2.25879e+09	2.84556e+09	2.72828e+09	2.30864e+09	2.46131e+09	2.15124e+09	2.18087e+09	2.75518e+09	2.38195e+09	2.85532e+09	2.75239e+09	3.01243e+09	2.87811e+09	2.98612e+09	2.81809e+09	2.5959e+09	2.06837e+09	2.64819e+09	2.2625e+09	31.3758	31.0729	31.4061	31.3453	31.1044	31.1968	31.0025	31.0223	31.3595	31.1495	31.411	31.358	31.4883	31.4225	31.4756	31.3921	31.2736	30.9458	31.3024	31.0753
P35991	BTK_MOUSE	Tyrosine-protein kinase BTK OS=Mus musculus GN=Btk PE=1 SV=4	Btk Bpk	2.6949e+09	2.28377e+09	2.7568e+09	2.56125e+09	2.3739e+09	2.58751e+09	2.30173e+09	2.29388e+09	2.7137e+09	2.43573e+09	2.74491e+09	2.72444e+09	2.6597e+09	2.67437e+09	2.91287e+09	2.68033e+09	2.76968e+09	2.19262e+09	2.67481e+09	2.42397e+09	31.3276	31.0888	31.3603	31.2542	31.1446	31.2689	31.1001	31.0951	31.3376	31.1817	31.3541	31.3433	31.3086	31.3165	31.4398	31.3198	31.3671	31.03	31.3168	31.1747
Q8VEK3	HNRPU_MOUSE	Heterogeneous nuclear ribonucleoprotein U OS=Mus musculus GN=Hnrnpu PE=1 SV=1	Hnrnpu Hnrpu	3.23821e+09	2.35352e+09	3.36805e+09	2.40312e+09	1.78456e+09	2.20026e+09	2.0636e+09	2.27238e+09	2.85093e+09	2.88465e+09	2.12615e+09	3.16976e+09	2.59158e+09	2.37047e+09	2.48312e+09	2.36551e+09	2.22912e+09	2.91118e+09	2.35233e+09	2.39213e+09	31.5925	31.1322	31.6493	31.1623	30.7329	31.035	30.9425	31.0816	31.4088	31.4257	30.9856	31.5617	31.2712	31.1425	31.2095	31.1395	31.0538	31.439	31.1314	31.1556
Q8C863	ITCH_MOUSE	E3 ubiquitin-protein ligase Itchy OS=Mus musculus GN=Itch PE=1 SV=2	Itch	2.85447e+09	1.5308e+09	2.81125e+09	2.20323e+09	2.18393e+09	2.33893e+09	1.69148e+09	2.07455e+09	2.95573e+09	1.98082e+09	2.54555e+09	3.28156e+09	3.09711e+09	3.28054e+09	2.82226e+09	2.77042e+09	3.42659e+09	1.39066e+09	2.55527e+09	2.19754e+09	31.4106	30.5116	31.3886	31.037	31.0243	31.1232	30.6556	30.9501	31.4609	30.8835	31.2453	31.6117	31.5283	31.6113	31.3942	31.3675	31.6741	30.3731	31.2508	31.0332
Q8K007	SULF1_MOUSE	Extracellular sulfatase Sulf-1 OS=Mus musculus GN=Sulf1 PE=2 SV=1	Sulf1 Kiaa1077	2.13064e+09	2.43008e+09	2.20688e+09	2.40434e+09	2.11535e+09	2.33347e+09	1.93656e+09	2.14307e+09	2.38041e+09	2.66648e+09	2.8114e+09	2.43327e+09	2.84002e+09	2.69477e+09	3.04595e+09	2.59885e+09	2.65062e+09	2.78474e+09	2.64397e+09	2.6847e+09	30.9886	31.1784	31.0394	31.163	30.9782	31.1198	30.8508	30.997	31.1486	31.3123	31.3886	31.1802	31.4033	31.3275	31.5042	31.2752	31.3037	31.3749	31.3001	31.3221
P14602	HSPB1_MOUSE	Heat shock protein beta-1 OS=Mus musculus GN=Hspb1 PE=1 SV=3	Hspb1 Hsp25 Hsp27	2.2795e+09	2.63828e+09	2.14994e+09	2.2588e+09	2.13083e+09	2.48015e+09	2.43121e+09	2.57304e+09	2.36956e+09	2.51e+09	2.30352e+09	2.09967e+09	2.42354e+09	2.40244e+09	2.28103e+09	2.25487e+09	2.02928e+09	3.32478e+09	2.84955e+09	3.40414e+09	31.0861	31.297	31.0017	31.0729	30.9888	31.2078	31.179	31.2608	31.142	31.225	31.1012	30.9675	31.1745	31.1619	31.087	31.0704	30.9183	31.6306	31.4081	31.6646
Q8BZ21	KAT6A_MOUSE	Histone acetyltransferase KAT6A OS=Mus musculus GN=Kat6a PE=1 SV=2	Kat6a Moz Myst3	1.71136e+09	2.37028e+09	1.37984e+09	2.78619e+09	2.23717e+09	1.86378e+09	3.96409e+09	1.8846e+09	1.80985e+09	1.77449e+09	3.67978e+09	1.7684e+09	1.71954e+09	1.58006e+09	2.60341e+09	1.36782e+09	2.18214e+09	2.98837e+09	5.80165e+09	2.96383e+09	30.6725	31.1424	30.3619	31.3756	31.059	30.7956	31.8843	30.8116	30.7532	30.7248	31.777	30.7198	30.6794	30.5573	31.2778	30.3492	31.0231	31.4767	32.4338	31.4648
Q61001	LAMA5_MOUSE	Laminin subunit alpha-5 OS=Mus musculus GN=Lama5 PE=1 SV=4	Lama5	2.47833e+09	2.51403e+09	2.31541e+09	2.24702e+09	2.01216e+09	2.01235e+09	2.03532e+09	2.32324e+09	2.43766e+09	2.59463e+09	2.12773e+09	2.58957e+09	2.15994e+09	2.47991e+09	2.25464e+09	2.62629e+09	2.50145e+09	3.02025e+09	2.67515e+09	2.8422e+09	31.2067	31.2274	31.1086	31.0654	30.9061	30.9062	30.9226	31.1135	31.1828	31.2729	30.9867	31.2701	31.0083	31.2076	31.0702	31.2904	31.2201	31.492	31.317	31.4044
O55135	IF6_MOUSE	Eukaryotic translation initiation factor 6 OS=Mus musculus GN=Eif6 PE=1 SV=2	Eif6 Itgb4bp	2.18855e+09	2.21593e+09	2.41914e+09	2.17778e+09	2.02089e+09	2.33291e+09	2.32388e+09	1.78739e+09	2.46795e+09	2.47586e+09	2.68814e+09	2.36077e+09	2.44537e+09	2.65162e+09	3.09251e+09	2.45392e+09	2.31284e+09	2.53332e+09	2.53842e+09	2.43476e+09	31.0273	31.0453	31.1718	31.0202	30.9123	31.1195	31.1139	30.7352	31.2007	31.2053	31.324	31.1366	31.1874	31.3042	31.5261	31.1924	31.107	31.2384	31.2413	31.1811
P02468	LAMC1_MOUSE	Laminin subunit gamma-1 OS=Mus musculus GN=Lamc1 PE=1 SV=2	Lamc1 Lamb-2 Lamc-1	2.74869e+09	2.48867e+09	2.59572e+09	2.07197e+09	2.01009e+09	2.12888e+09	1.74896e+09	2.04525e+09	2.38207e+09	2.13629e+09	2.10448e+09	2.9489e+09	2.57401e+09	2.62185e+09	2.48421e+09	2.63532e+09	3.05318e+09	1.99749e+09	2.49559e+09	2.35215e+09	31.3561	31.2127	31.2735	30.9484	30.9046	30.9874	30.7038	30.9296	31.1496	30.9925	30.9708	31.4575	31.2614	31.2879	31.2101	31.2953	31.5077	30.8955	31.2167	31.1313
Q9CWI3	BCCIP_MOUSE	BRCA2 and CDKN1A-interacting protein OS=Mus musculus GN=Bccip PE=2 SV=1	Bccip	2.29496e+09	2.29317e+09	2.41589e+09	2.36108e+09	2.02607e+09	2.20156e+09	2.41801e+09	1.73818e+09	2.54441e+09	2.44338e+09	2.69577e+09	2.56001e+09	2.35005e+09	2.51416e+09	2.88385e+09	2.26456e+09	2.31436e+09	2.40668e+09	2.43925e+09	2.38606e+09	31.0958	31.0947	31.1699	31.1368	30.916	31.0359	31.1712	30.6949	31.2447	31.1862	31.3281	31.2535	31.13	31.2274	31.4253	31.0766	31.108	31.1644	31.1838	31.152
Q00612	G6PD1_MOUSE	Glucose-6-phosphate 1-dehydrogenase X OS=Mus musculus GN=G6pdx PE=1 SV=3	G6pdx G6pd G6pd-1	2.13551e+09	2.40098e+09	2.01766e+09	2.29298e+09	2.22749e+09	2.58706e+09	2.3032e+09	2.15751e+09	2.4624e+09	2.67005e+09	2.10134e+09	2.41032e+09	2.72298e+09	2.44558e+09	2.10723e+09	2.51519e+09	1.75175e+09	2.37308e+09	1.88152e+09	2.42127e+09	30.9919	31.161	30.91	31.0946	31.0528	31.2687	31.101	31.0067	31.1974	31.3142	30.9687	31.1666	31.3425	31.1875	30.9727	31.228	30.7062	31.1441	30.8092	31.1731
Q8QZR4	OAF_MOUSE	Out at first protein homolog OS=Mus musculus GN=Oaf PE=2 SV=1	Oaf D9Ucla1	2.33472e+09	2.11303e+09	2.50759e+09	2.33974e+09	2.45388e+09	2.73564e+09	2.84292e+09	2.40646e+09	2.25889e+09	2.24372e+09	2.17888e+09	2.22e+09	2.15715e+09	2.19826e+09	2.37036e+09	2.10507e+09	2.04349e+09	1.90681e+09	2.11605e+09	2.18163e+09	31.1206	30.9767	31.2237	31.1237	31.1924	31.3492	31.4047	31.1643	31.073	31.0632	31.0209	31.0479	31.0065	31.0337	31.1425	30.9712	30.9284	30.8285	30.9787	31.0228
Q9QXS1	PLEC_MOUSE	Plectin OS=Mus musculus GN=Plec PE=1 SV=2	Plec Plec1	2.22345e+09	2.58729e+09	2.36712e+09	2.31333e+09	2.30825e+09	2.42502e+09	2.63007e+09	2.40896e+09	2.32033e+09	2.52453e+09	2.26068e+09	2.12049e+09	2.14034e+09	2.0794e+09	2.20708e+09	2.13517e+09	1.93062e+09	2.25851e+09	1.86803e+09	2.26802e+09	31.0502	31.2688	31.1405	31.1073	31.1042	31.1753	31.2925	31.1658	31.1117	31.2334	31.0741	30.9818	30.9952	30.9535	31.0395	30.9917	30.8464	31.0727	30.7989	31.0788
P24399	ZN239_MOUSE	Zinc finger protein 239 OS=Mus musculus GN=Znf239 PE=2 SV=2	Znf239 Mok-2 Mok2 Zfp239	1.97865e+09	2.18966e+09	2.06067e+09	2.30061e+09	2.03052e+09	2.2922e+09	2.45171e+09	2.03358e+09	2.24604e+09	2.33937e+09	2.40149e+09	2.17048e+09	2.50877e+09	2.19318e+09	2.13661e+09	2.48451e+09	2.00285e+09	2.67004e+09	2.20313e+09	2.65314e+09	30.8819	31.0281	30.9405	31.0994	30.9192	31.0941	31.1911	30.9214	31.0647	31.1235	31.1613	31.0154	31.2243	31.0304	30.9927	31.2103	30.8994	31.3142	31.0369	31.3051
Q8BWY3	ERF1_MOUSE	Eukaryotic peptide chain release factor subunit 1 OS=Mus musculus GN=Etf1 PE=1 SV=4	Etf1	2.0634e+09	2.12006e+09	2.17352e+09	2.19536e+09	1.97802e+09	2.22195e+09	2.26073e+09	1.7911e+09	2.33864e+09	2.3712e+09	2.4005e+09	2.14736e+09	2.37136e+09	2.36862e+09	2.54186e+09	2.36117e+09	2.2037e+09	2.28369e+09	2.09937e+09	2.35484e+09	30.9424	30.9815	31.0174	31.0318	30.8814	31.0492	31.0741	30.7382	31.123	31.143	31.1607	30.9999	31.1431	31.1414	31.2432	31.1369	31.0373	31.0887	30.9673	31.133
Q9DBG3	AP2B1_MOUSE	AP-2 complex subunit beta OS=Mus musculus GN=Ap2b1 PE=1 SV=1	Ap2b1 Clapb1	1.99818e+09	2.0854e+09	2.14997e+09	2.23064e+09	2.54533e+09	2.57206e+09	3.18431e+09	2.62951e+09	2.01675e+09	2.00921e+09	2.09748e+09	1.99365e+09	2.02557e+09	2.08017e+09	2.22016e+09	2.05432e+09	2.02332e+09	2.08325e+09	2.13443e+09	2.12583e+09	30.896	30.9577	31.0017	31.0548	31.2452	31.2603	31.5683	31.2921	30.9094	30.904	30.966	30.8928	30.9157	30.9541	31.048	30.936	30.9141	30.9562	30.9912	30.9854
Q64487	PTPRD_MOUSE	Receptor-type tyrosine-protein phosphatase delta OS=Mus musculus GN=Ptprd PE=1 SV=3	Ptprd	1.97656e+09	2.25072e+09	2.20312e+09	2.23761e+09	2.125e+09	2.14829e+09	2.31569e+09	2.0956e+09	2.18478e+09	2.28122e+09	2.37862e+09	2.12944e+09	2.25894e+09	2.01843e+09	2.36194e+09	2.1558e+09	2.20736e+09	2.46409e+09	2.0836e+09	2.37267e+09	30.8803	31.0677	31.0369	31.0593	30.9848	31.0005	31.1088	30.9647	31.0248	31.0872	31.1475	30.9878	31.073	30.9106	31.1373	31.0056	31.0397	31.1984	30.9564	31.1439
Q99JB8	PACN3_MOUSE	Protein kinase C and casein kinase II substrate protein 3 OS=Mus musculus GN=Pacsin3 PE=1 SV=1	Pacsin3	2.11172e+09	2.01481e+09	2.38033e+09	2.09752e+09	2.05639e+09	2.22753e+09	1.95235e+09	2.12571e+09	2.0582e+09	2.16736e+09	2.18142e+09	2.25134e+09	2.34104e+09	2.4589e+09	2.44816e+09	2.40909e+09	2.12557e+09	2.19966e+09	2.46164e+09	2.07703e+09	30.9758	30.908	31.1485	30.966	30.9375	31.0528	30.8626	30.9853	30.9387	31.0133	31.0226	31.0681	31.1245	31.1954	31.1891	31.1658	30.9852	31.0346	31.197	30.9519
P54822	PUR8_MOUSE	Adenylosuccinate lyase OS=Mus musculus GN=Adsl PE=2 SV=2	Adsl Adl	2.61981e+09	1.62981e+09	2.88023e+09	2.64374e+09	2.03136e+09	2.14389e+09	1.78455e+09	1.36228e+09	2.63412e+09	2.02646e+09	2.50736e+09	2.63479e+09	2.39375e+09	2.53235e+09	2.7445e+09	2.13331e+09	2.21555e+09	1.29052e+09	2.25804e+09	1.48699e+09	31.2868	30.6021	31.4235	31.2999	30.9198	30.9976	30.7329	30.3434	31.2947	30.9163	31.2235	31.295	31.1566	31.2378	31.3539	30.9904	31.045	30.2653	31.0724	30.4698
Q9JJN5	CBPN_MOUSE	Carboxypeptidase N catalytic chain OS=Mus musculus GN=Cpn1 PE=2 SV=1	Cpn1	1.93586e+09	1.98563e+09	1.96251e+09	2.21895e+09	2.03016e+09	2.1403e+09	2.06654e+09	1.98676e+09	2.20031e+09	2.1859e+09	2.30435e+09	2.124e+09	2.36186e+09	2.34494e+09	2.42873e+09	2.36527e+09	1.98816e+09	2.17492e+09	2.2779e+09	2.22071e+09	30.8503	30.887	30.8701	31.0472	30.9189	30.9952	30.9446	30.8878	31.0351	31.0256	31.1017	30.9841	31.1373	31.1269	31.1776	31.1394	30.8888	31.0183	31.0851	31.0484
P16460	ASSY_MOUSE	Argininosuccinate synthase OS=Mus musculus GN=Ass1 PE=1 SV=1	Ass1 Ass	2.12264e+09	2.15555e+09	2.17492e+09	2.31577e+09	2.09279e+09	2.18371e+09	2.17704e+09	1.93528e+09	2.26808e+09	2.18734e+09	2.28587e+09	2.05192e+09	2.27925e+09	2.14105e+09	2.23872e+09	2.19301e+09	2.02862e+09	1.99496e+09	1.88924e+09	2.02201e+09	30.9832	31.0054	31.0183	31.1088	30.9628	31.0241	31.0197	30.8499	31.0788	31.0265	31.0901	30.9343	31.0859	30.9957	31.06	31.0303	30.9179	30.8937	30.8152	30.9131
Q64374	RGN_MOUSE	Regucalcin OS=Mus musculus GN=Rgn PE=1 SV=1	Rgn Smp30	2.52456e+09	2.18036e+09	2.6144e+09	2.27192e+09	1.75319e+09	2.02281e+09	1.70961e+09	1.94658e+09	2.15648e+09	2.03346e+09	1.89267e+09	2.18227e+09	2.14671e+09	2.13784e+09	2.05416e+09	2.53108e+09	1.86399e+09	1.94451e+09	1.956e+09	1.85945e+09	31.2334	31.0219	31.2838	31.0813	30.7073	30.9137	30.671	30.8583	31.006	30.9213	30.8178	31.0232	30.9995	30.9935	30.9359	31.2371	30.7957	30.8568	30.8653	30.7922
A2ARV4	LRP2_MOUSE	Low-density lipoprotein receptor-related protein 2 OS=Mus musculus GN=Lrp2 PE=1 SV=1	Lrp2	2.08707e+09	1.87824e+09	2.53535e+09	2.12092e+09	1.83283e+09	2.24655e+09	2.00467e+09	1.63324e+09	1.9138e+09	1.95813e+09	2.15513e+09	1.89537e+09	1.97126e+09	2.06622e+09	3.12956e+09	2.10803e+09	1.75717e+09	2.05811e+09	2.09773e+09	2.00617e+09	30.9588	30.8067	31.2395	30.982	30.7714	31.0651	30.9007	30.6051	30.8338	30.8668	31.0051	30.8198	30.8765	30.9443	31.5433	30.9732	30.7106	30.9387	30.9662	30.9018
Q80X90	FLNB_MOUSE	Filamin-B OS=Mus musculus GN=Flnb PE=1 SV=3	Flnb	2.1425e+09	1.87471e+09	2.22819e+09	1.902e+09	1.79712e+09	1.95193e+09	1.82387e+09	1.76005e+09	2.19297e+09	2.13087e+09	2.08503e+09	2.32365e+09	2.21337e+09	2.19043e+09	2.35812e+09	2.19005e+09	2.10918e+09	1.90838e+09	2.01959e+09	2.13855e+09	30.9966	30.804	31.0532	30.8249	30.743	30.8623	30.7644	30.713	31.0302	30.9888	30.9574	31.1137	31.0436	31.0286	31.135	31.0283	30.974	30.8297	30.9114	30.994
O55222	ILK_MOUSE	Integrin-linked protein kinase OS=Mus musculus GN=Ilk PE=1 SV=2	Ilk ILK1 ILK2	1.9811e+09	1.90232e+09	2.04897e+09	2.01223e+09	1.93072e+09	1.9923e+09	1.91921e+09	1.87048e+09	2.16697e+09	1.99727e+09	2.16957e+09	2.01881e+09	2.18065e+09	2.15525e+09	2.15554e+09	2.24638e+09	1.99768e+09	1.81152e+09	1.91838e+09	1.90604e+09	30.8837	30.8251	30.9322	30.9061	30.8465	30.8918	30.8379	30.8008	31.013	30.8954	31.0148	30.9109	31.0221	31.0052	31.0054	31.065	30.8957	30.7545	30.8372	30.8279
E9Q557	DESP_MOUSE	Desmoplakin OS=Mus musculus GN=Dsp PE=2 SV=1	Dsp	1.55463e+09	2.70728e+09	1.58192e+09	2.65794e+09	2.05615e+09	2.23097e+09	2.7768e+09	1.89196e+09	1.94949e+09	2.51465e+09	1.9277e+09	1.4339e+09	2.27636e+09	1.73894e+09	1.84843e+09	1.90641e+09	1.54553e+09	2.28574e+09	1.59055e+09	1.82133e+09	30.5339	31.3342	30.559	31.3077	30.9373	31.055	31.3708	30.8172	30.8605	31.2277	30.8442	30.4173	31.0841	30.6956	30.7837	30.8282	30.5255	31.09	30.5669	30.7623
A2A863	ITB4_MOUSE	Integrin beta-4 OS=Mus musculus GN=Itgb4 PE=2 SV=1	Itgb4	2.11945e+09	2.20094e+09	2.22266e+09	1.91554e+09	1.73574e+09	1.87738e+09	1.69848e+09	1.81481e+09	1.85694e+09	2.10192e+09	1.98667e+09	2.12174e+09	1.98938e+09	2.10237e+09	2.02903e+09	1.87466e+09	1.89415e+09	2.34889e+09	1.9941e+09	2.17403e+09	30.981	31.0355	31.0496	30.8351	30.6929	30.8061	30.6616	30.7572	30.7903	30.9691	30.8877	30.9826	30.8897	30.9694	30.9181	30.804	30.8189	31.1293	30.8931	31.0177
P62331	ARF6_MOUSE	ADP-ribosylation factor 6 OS=Mus musculus GN=Arf6 PE=1 SV=2	Arf6	1.93957e+09	1.79836e+09	1.8942e+09	1.82511e+09	1.74369e+09	1.78238e+09	2.05138e+09	1.77715e+09	2.25133e+09	2.14477e+09	2.08538e+09	1.9204e+09	2.25942e+09	1.9798e+09	2.18032e+09	1.93329e+09	1.8669e+09	2.21232e+09	2.08685e+09	2.1036e+09	30.8531	30.744	30.8189	30.7653	30.6995	30.7312	30.9339	30.7269	31.0681	30.9982	30.9577	30.8388	31.0733	30.8827	31.0219	30.8484	30.798	31.0429	30.9587	30.9702
P01029	CO4B_MOUSE	Complement C4-B OS=Mus musculus GN=C4b PE=1 SV=3	C4b C4	2.04574e+09	2.19253e+09	2.23102e+09	2.27063e+09	2.23429e+09	2.0264e+09	2.11445e+09	1.98467e+09	1.8727e+09	1.80527e+09	2.04056e+09	1.78521e+09	1.87154e+09	2.01777e+09	2.11955e+09	1.97282e+09	1.76016e+09	1.9188e+09	1.89902e+09	1.66493e+09	30.93	31.0299	31.0551	31.0804	31.0572	30.9163	30.9776	30.8863	30.8025	30.7496	30.9263	30.7334	30.8016	30.9101	30.9811	30.8776	30.7131	30.8376	30.8226	30.6328
E9PV24	FIBA_MOUSE	Fibrinogen alpha chain OS=Mus musculus GN=Fga PE=2 SV=1	Fga	2.0491e+09	1.67611e+09	2.16235e+09	2.19689e+09	1.71341e+09	1.98831e+09	1.83967e+09	1.80147e+09	2.29716e+09	1.95943e+09	2.23353e+09	2.03537e+09	1.94219e+09	2.19868e+09	2.37517e+09	2.02074e+09	1.54421e+09	1.86693e+09	1.89859e+09	2.00543e+09	30.9323	30.6425	31.01	31.0328	30.6742	30.8889	30.7768	30.7465	31.0972	30.8678	31.0567	30.9226	30.855	31.034	31.1454	30.9122	30.5242	30.798	30.8223	30.9013
Q8BHL4	RAI3_MOUSE	Retinoic acid-induced protein 3 OS=Mus musculus GN=Gprc5a PE=2 SV=1	Gprc5a Rai3 Raig1	1.09931e+09	1.30161e+09	7.89488e+08	1.12456e+09	4.76822e+09	3.94783e+09	4.33097e+09	3.93915e+09	1.92012e+09	2.14631e+09	1.71657e+09	1.56499e+09	1.40384e+09	1.11994e+09	1.17851e+09	1.07354e+09	1.5383e+09	1.27844e+09	1.58155e+09	1.55956e+09	30.0339	30.2776	29.5563	30.0667	32.1508	31.8784	32.012	31.8752	30.8385	30.9992	30.6769	30.5435	30.3867	30.0608	30.1343	29.9997	30.5187	30.2517	30.5587	30.5385
P00687	AMY1_MOUSE	Alpha-amylase 1 OS=Mus musculus GN=Amy1 PE=1 SV=2	Amy1 Amy-1-a Amy1a	2.04842e+09	1.87245e+09	2.05177e+09	2.14235e+09	1.77489e+09	1.83843e+09	1.97479e+09	1.77699e+09	1.97485e+09	1.77007e+09	2.13684e+09	2.06149e+09	2.13872e+09	2.05769e+09	2.23385e+09	1.92229e+09	1.93032e+09	1.76128e+09	2.14502e+09	1.76905e+09	30.9319	30.8023	30.9342	30.9965	30.7251	30.7758	30.879	30.7268	30.8791	30.7212	30.9928	30.941	30.9941	30.9384	31.0569	30.8402	30.8462	30.714	30.9983	30.7203
Q68FL6	SYMC_MOUSE	Methionine--tRNA ligase, cytoplasmic OS=Mus musculus GN=Mars PE=2 SV=1	Mars1 Mars	1.91981e+09	1.98971e+09	2.27037e+09	2.11245e+09	1.55134e+09	1.96583e+09	1.72521e+09	1.67372e+09	1.96555e+09	1.71074e+09	1.76514e+09	2.28343e+09	1.69364e+09	2.28133e+09	2.10415e+09	2.13295e+09	1.65213e+09	2.36727e+09	1.83155e+09	2.35112e+09	30.8383	30.8899	31.0803	30.9763	30.5309	30.8725	30.6841	30.6404	30.8723	30.672	30.7171	31.0886	30.6575	31.0872	30.9706	30.9902	30.6217	31.1406	30.7704	31.1307
Q03145	EPHA2_MOUSE	Ephrin type-A receptor 2 OS=Mus musculus GN=Epha2 PE=1 SV=3	Epha2 Eck Myk2 Sek2	1.11225e+09	1.24731e+09	9.61075e+08	1.15361e+09	2.35532e+09	1.99438e+09	2.33325e+09	2.42957e+09	2.32215e+09	2.64501e+09	2.38955e+09	2.36546e+09	1.60401e+09	1.40791e+09	1.41678e+09	1.26941e+09	2.83387e+09	2.18991e+09	2.64967e+09	2.63561e+09	30.0508	30.2162	29.8401	30.1035	31.1333	30.8933	31.1197	31.1781	31.1128	31.3006	31.1541	31.1395	30.579	30.3909	30.4	30.2415	31.4001	31.0282	31.3032	31.2955
Q61087	LAMB3_MOUSE	Laminin subunit beta-3 OS=Mus musculus GN=Lamb3 PE=2 SV=2	Lamb3	1.61644e+09	1.69837e+09	1.68136e+09	1.62704e+09	1.95151e+09	1.80263e+09	1.93346e+09	2.64952e+09	1.6284e+09	1.75302e+09	1.70287e+09	1.82129e+09	1.91187e+09	1.72384e+09	1.51152e+09	1.84763e+09	2.70632e+09	2.567e+09	2.43202e+09	2.65168e+09	30.5902	30.6615	30.647	30.5996	30.8619	30.7475	30.8485	31.3031	30.6008	30.7072	30.6653	30.7623	30.8323	30.683	30.4934	30.783	31.3337	31.2574	31.1795	31.3043
P68368	TBA4A_MOUSE	Tubulin alpha-4A chain OS=Mus musculus GN=Tuba4a PE=1 SV=1	Tuba4a Tuba4	1.6556e+09	1.74494e+09	1.60139e+09	1.68808e+09	1.8651e+09	1.79552e+09	1.89586e+09	1.84959e+09	2.18874e+09	2.15716e+09	2.06914e+09	1.86721e+09	2.32962e+09	2.00573e+09	2.10106e+09	1.97392e+09	1.99863e+09	2.02723e+09	2.15803e+09	2.11483e+09	30.6247	30.7005	30.5767	30.6527	30.7966	30.7418	30.8202	30.7846	31.0275	31.0065	30.9464	30.7982	31.1174	30.9015	30.9685	30.8784	30.8964	30.9169	31.0071	30.9779
Q68FH4	GALK2_MOUSE	N-acetylgalactosamine kinase OS=Mus musculus GN=Galk2 PE=1 SV=1	Galk2	1.9603e+09	1.98364e+09	1.92071e+09	1.88768e+09	1.8415e+09	1.84608e+09	1.44088e+09	2.09938e+09	2.19698e+09	2.41994e+09	1.90503e+09	2.08966e+09	1.84834e+09	1.49954e+09	1.38674e+09	1.65227e+09	1.86999e+09	2.6559e+09	1.85277e+09	2.37821e+09	30.8684	30.8855	30.839	30.814	30.7782	30.7818	30.4243	30.9673	31.0329	31.1723	30.8272	30.9606	30.7836	30.4819	30.3691	30.6218	30.8004	31.3066	30.787	31.1472
Q9R182	ANGL3_MOUSE	Angiopoietin-related protein 3 OS=Mus musculus GN=Angptl3 PE=2 SV=1	Angptl3	1.74854e+09	2.09972e+09	2.25679e+09	1.7339e+09	2.26409e+09	2.23638e+09	2.29808e+09	2.86366e+09	2.043e+09	2.08847e+09	1.60337e+09	1.77949e+09	1.72071e+09	1.75264e+09	1.65128e+09	1.97855e+09	1.45397e+09	1.82565e+09	1.42856e+09	1.78213e+09	30.7035	30.9675	31.0716	30.6914	31.0763	31.0585	31.0978	31.4152	30.928	30.9598	30.5785	30.7288	30.6804	30.7069	30.6209	30.8818	30.4373	30.7658	30.4119	30.731
Q6P5D4	CP135_MOUSE	Centrosomal protein of 135 kDa OS=Mus musculus GN=Cep135 PE=1 SV=1	Cep135 Cep4 Kiaa0635	2.10992e+09	1.48402e+09	1.9668e+09	1.9358e+09	1.85796e+09	1.99601e+09	1.45215e+09	1.98805e+09	1.8139e+09	1.87843e+09	1.70545e+09	2.4152e+09	1.86441e+09	2.04701e+09	2.02091e+09	2.39256e+09	1.66402e+09	1.76279e+09	1.98951e+09	2.19404e+09	30.9745	30.4669	30.8732	30.8503	30.7911	30.8945	30.4355	30.8887	30.7564	30.8069	30.6675	31.1695	30.7961	30.9309	30.9124	31.1559	30.632	30.7152	30.8898	31.0309
Q80U87	UBP8_MOUSE	Ubiquitin carboxyl-terminal hydrolase 8 OS=Mus musculus GN=Usp8 PE=1 SV=2	Usp8 Kiaa0055 Ubpy	2.26291e+09	1.58397e+09	3.03779e+09	1.79582e+09	1.61327e+09	2.19394e+09	1.49293e+09	1.57771e+09	2.24572e+09	1.8024e+09	1.87534e+09	2.49748e+09	1.61837e+09	2.13403e+09	2.31421e+09	2.16052e+09	2.0211e+09	1.15843e+09	1.97362e+09	1.07453e+09	31.0755	30.5609	31.5004	30.742	30.5873	31.0309	30.4755	30.5552	31.0645	30.7473	30.8045	31.2178	30.5919	30.9909	31.1079	31.0087	30.9125	30.1095	30.8782	30.0011
Q64514	TPP2_MOUSE	Tripeptidyl-peptidase 2 OS=Mus musculus GN=Tpp2 PE=2 SV=3	Tpp2	2.02721e+09	1.69472e+09	1.96161e+09	1.90085e+09	1.82153e+09	1.68648e+09	1.62514e+09	1.45866e+09	2.21276e+09	1.97151e+09	1.96214e+09	2.02163e+09	1.86669e+09	1.9271e+09	1.91573e+09	2.02963e+09	2.04617e+09	1.81137e+09	1.87545e+09	2.07273e+09	30.9168	30.6584	30.8694	30.824	30.7625	30.6514	30.5979	30.442	31.0432	30.8767	30.8698	30.9129	30.7978	30.8438	30.8352	30.9186	30.9303	30.7544	30.8046	30.9489
Q08879	FBLN1_MOUSE	Fibulin-1 OS=Mus musculus GN=Fbln1 PE=1 SV=2	Fbln1	2.38089e+09	1.43283e+09	2.29107e+09	2.02679e+09	1.76651e+09	1.38404e+09	1.40124e+09	1.76243e+09	1.97492e+09	1.2209e+09	2.17964e+09	2.22853e+09	2.22413e+09	2.20188e+09	2.2434e+09	2.16291e+09	2.12546e+09	1.17413e+09	2.15538e+09	1.23691e+09	31.1489	30.4162	31.0934	30.9165	30.7183	30.3662	30.3841	30.7149	30.8791	30.1853	31.0214	31.0534	31.0506	31.0361	31.063	31.0103	30.9851	30.1289	31.0053	30.2041
Q6PDK2	KMT2D_MOUSE	Histone-lysine N-methyltransferase 2D OS=Mus musculus GN=Kmt2d PE=1 SV=2	Kmt2d Mll2 Mll4	2.12203e+09	1.63326e+09	2.11669e+09	1.77342e+09	1.70419e+09	1.90099e+09	1.78591e+09	1.45313e+09	1.69417e+09	1.5207e+09	1.98488e+09	2.15239e+09	1.8577e+09	2.05478e+09	2.47944e+09	1.76088e+09	1.87752e+09	1.62346e+09	2.09466e+09	1.70432e+09	30.9828	30.6051	30.9792	30.7239	30.6664	30.8241	30.734	30.4365	30.6579	30.5021	30.8864	31.0033	30.7909	30.9363	31.2074	30.7137	30.8062	30.5964	30.9641	30.6665
Q8K1B8	URP2_MOUSE	Fermitin family homolog 3 OS=Mus musculus GN=Fermt3 PE=1 SV=1	Fermt3 Kind3 Urp2	1.89299e+09	1.80894e+09	1.92964e+09	1.84933e+09	1.86214e+09	1.86878e+09	1.89502e+09	1.91422e+09	1.98157e+09	1.64961e+09	1.94645e+09	1.90154e+09	1.86628e+09	1.98194e+09	1.93354e+09	2.2025e+09	1.64605e+09	1.72075e+09	1.74727e+09	1.6585e+09	30.818	30.7525	30.8457	30.7844	30.7943	30.7995	30.8196	30.8341	30.884	30.6195	30.8582	30.8245	30.7975	30.8843	30.8486	31.0365	30.6164	30.6804	30.7025	30.6272
Q8BSS9	LIPA2_MOUSE	Liprin-alpha-2 OS=Mus musculus GN=Ppfia2 PE=1 SV=2	Ppfia2	1.58652e+09	2.01003e+09	1.78558e+09	1.75366e+09	1.6865e+09	1.89792e+09	1.74171e+09	1.64566e+09	1.7649e+09	1.97966e+09	1.81705e+09	1.70696e+09	1.98684e+09	1.91719e+09	1.74566e+09	1.73672e+09	1.807e+09	2.85002e+09	1.56579e+09	2.22492e+09	30.5632	30.9046	30.7337	30.7077	30.6514	30.8218	30.6979	30.616	30.7169	30.8826	30.7589	30.6688	30.8878	30.8363	30.7011	30.6937	30.751	31.4083	30.5442	31.0511
O54890	ITB3_MOUSE	Integrin beta-3 OS=Mus musculus GN=Itgb3 PE=1 SV=2	Itgb3	1.85899e+09	1.66164e+09	1.98181e+09	1.84757e+09	1.77447e+09	1.6305e+09	1.95736e+09	1.58663e+09	2.02778e+09	1.74553e+09	2.11074e+09	1.94476e+09	1.8883e+09	1.9817e+09	2.10192e+09	1.69364e+09	1.77512e+09	1.67676e+09	1.97696e+09	1.76531e+09	30.7919	30.63	30.8842	30.783	30.7247	30.6027	30.8663	30.5633	30.9173	30.701	30.9751	30.8569	30.8144	30.8841	30.9691	30.6575	30.7253	30.643	30.8806	30.7173
Q61646	HPT_MOUSE	Haptoglobin OS=Mus musculus GN=Hp PE=1 SV=1	Hp	1.56193e+09	1.70243e+09	1.99496e+09	1.81355e+09	1.72765e+09	2.11039e+09	1.75218e+09	1.2233e+09	1.93446e+09	2.03973e+09	1.77665e+09	2.23102e+09	1.52989e+09	2.11214e+09	2.0037e+09	2.01302e+09	1.66735e+09	2.10493e+09	1.60826e+09	1.92553e+09	30.5407	30.6649	30.8937	30.7562	30.6862	30.9749	30.7065	30.1881	30.8493	30.9257	30.7265	31.0551	30.5108	30.9761	30.9	30.9067	30.6349	30.9711	30.5829	30.8426
Q8BTZ7	GMPPB_MOUSE	Mannose-1-phosphate guanyltransferase beta OS=Mus musculus GN=Gmppb PE=2 SV=1	Gmppb	1.54858e+09	1.63156e+09	8.94996e+08	9.45931e+08	2.62026e+09	2.0645e+09	1.489e+09	1.77122e+09	2.14697e+09	2.11146e+09	1.19839e+09	1.5878e+09	1.94208e+09	1.48733e+09	1.05403e+09	1.33448e+09	2.70917e+09	2.24084e+09	2.54583e+09	2.85355e+09	30.5283	30.6036	29.7373	29.8172	31.2871	30.9431	30.4717	30.7221	30.9997	30.9756	30.1585	30.5644	30.855	30.4701	29.9733	30.3136	31.3352	31.0614	31.2455	31.4101
P61205	ARF3_MOUSE	ADP-ribosylation factor 3 OS=Mus musculus GN=Arf3 PE=2 SV=2	Arf3	1.7119e+09	1.8168e+09	1.65199e+09	1.67494e+09	1.91565e+09	1.74675e+09	1.71879e+09	1.9029e+09	1.88486e+09	1.76351e+09	1.79038e+09	1.91294e+09	1.81904e+09	1.81029e+09	1.61283e+09	1.7381e+09	1.92073e+09	1.82935e+09	1.79935e+09	1.99754e+09	30.673	30.7588	30.6216	30.6415	30.8352	30.702	30.6787	30.8256	30.8118	30.7158	30.7376	30.8331	30.7605	30.7536	30.5869	30.6949	30.839	30.7687	30.7448	30.8956
P23249	MOV10_MOUSE	Putative helicase MOV-10 OS=Mus musculus GN=Mov10 PE=1 SV=2	Mov10 Gb110	1.69445e+09	1.75325e+09	1.71479e+09	1.93763e+09	1.78987e+09	1.75483e+09	1.91341e+09	1.63465e+09	1.76438e+09	1.68197e+09	1.96185e+09	1.70653e+09	1.81043e+09	1.72667e+09	2.00864e+09	1.6507e+09	1.75236e+09	1.84729e+09	2.02032e+09	1.74767e+09	30.6582	30.7074	30.6754	30.8516	30.7372	30.7087	30.8335	30.6063	30.7165	30.6475	30.8696	30.6684	30.7537	30.6853	30.9036	30.6204	30.7067	30.7828	30.9119	30.7028
Q62009	POSTN_MOUSE	Periostin OS=Mus musculus GN=Postn PE=1 SV=2	Postn Osf2	2.06371e+09	2.37873e+09	1.97384e+09	1.93721e+09	1.69662e+09	1.54074e+09	1.63556e+09	1.82036e+09	1.75463e+09	1.946e+09	1.67305e+09	1.58388e+09	1.8912e+09	1.66806e+09	1.74437e+09	1.74772e+09	1.65429e+09	1.68868e+09	1.50891e+09	1.5906e+09	30.9426	31.1475	30.8784	30.8513	30.66	30.521	30.6071	30.7616	30.7085	30.8579	30.6398	30.5608	30.8167	30.6355	30.7001	30.7028	30.6236	30.6533	30.4909	30.5669
Q9JKF1	IQGA1_MOUSE	Ras GTPase-activating-like protein IQGAP1 OS=Mus musculus GN=Iqgap1 PE=1 SV=2	Iqgap1	1.81268e+09	1.61067e+09	1.88838e+09	1.97666e+09	1.70581e+09	1.49485e+09	1.50828e+09	1.44508e+09	1.89761e+09	1.72325e+09	1.94141e+09	1.81389e+09	1.54462e+09	1.80659e+09	1.70705e+09	1.79957e+09	1.5435e+09	2.01343e+09	2.20112e+09	2.03549e+09	30.7555	30.585	30.8145	30.8804	30.6678	30.4774	30.4903	30.4285	30.8215	30.6825	30.8545	30.7564	30.5246	30.7506	30.6689	30.745	30.5236	30.907	31.0356	30.9227
Q4FZC9	SYNE3_MOUSE	Nesprin-3 OS=Mus musculus GN=Syne3 PE=1 SV=1	Syne3	1.72628e+09	1.70381e+09	1.78131e+09	1.67288e+09	2.29649e+09	2.22343e+09	2.18791e+09	2.40211e+09	1.61572e+09	1.71364e+09	1.51104e+09	1.62803e+09	1.60682e+09	1.67072e+09	1.57536e+09	1.63433e+09	1.50921e+09	1.56617e+09	1.43913e+09	1.67274e+09	30.685	30.6661	30.7303	30.6397	31.0968	31.0501	31.0269	31.1617	30.5895	30.6744	30.4929	30.6005	30.5816	30.6378	30.553	30.606	30.4911	30.5446	30.4225	30.6396
Q9JHH6	CBPB2_MOUSE	Carboxypeptidase B2 OS=Mus musculus GN=Cpb2 PE=1 SV=1	Cpb2 Tafi	1.55568e+09	1.65915e+09	1.81725e+09	1.73308e+09	1.57511e+09	1.73495e+09	1.74758e+09	1.67365e+09	1.96201e+09	2.06184e+09	1.79961e+09	1.74877e+09	1.74961e+09	1.75246e+09	1.91878e+09	1.73043e+09	1.57246e+09	1.78499e+09	1.58951e+09	1.82772e+09	30.5349	30.6278	30.7591	30.6907	30.5528	30.6922	30.7027	30.6403	30.8697	30.9413	30.745	30.7037	30.7044	30.7067	30.8375	30.6885	30.5504	30.7333	30.5659	30.7674
P49962	SRP09_MOUSE	Signal recognition particle 9 kDa protein OS=Mus musculus GN=Srp9 PE=1 SV=2	Srp9	1.87936e+09	1.54908e+09	1.87543e+09	1.82045e+09	1.61588e+09	1.73996e+09	1.43375e+09	1.50246e+09	1.92216e+09	1.68389e+09	1.8402e+09	1.7989e+09	1.8923e+09	2.03254e+09	1.99116e+09	1.8355e+09	1.62277e+09	1.33703e+09	1.92137e+09	1.68928e+09	30.8076	30.5288	30.8046	30.7616	30.5897	30.6964	30.4171	30.4847	30.8401	30.6492	30.7772	30.7445	30.8175	30.9206	30.891	30.7735	30.5958	30.3164	30.8395	30.6538
O09126	SEM4D_MOUSE	Semaphorin-4D OS=Mus musculus GN=Sema4d PE=1 SV=2	Sema4d Semacl2 Semaj	2.19256e+09	1.00665e+09	1.12488e+09	1.32221e+09	2.43294e+09	1.56912e+09	1.16506e+09	1.682e+09	1.88197e+09	1.18406e+09	1.76704e+09	2.11255e+09	2.40977e+09	1.64909e+09	1.42074e+09	1.48665e+09	2.74654e+09	1.26746e+09	3.01146e+09	1.53776e+09	31.03	29.9069	30.0671	30.3003	31.1801	30.5473	30.1178	30.6475	30.8096	30.1411	30.7187	30.9763	31.1662	30.619	30.404	30.4694	31.355	30.2393	31.4878	30.5182
Q9WVK4	EHD1_MOUSE	EH domain-containing protein 1 OS=Mus musculus GN=Ehd1 PE=1 SV=1	Ehd1 Past1	1.07203e+09	1.23816e+09	9.84098e+08	1.16816e+09	2.55883e+09	2.40795e+09	2.60451e+09	2.80213e+09	1.78136e+09	1.97137e+09	1.72345e+09	1.83189e+09	1.36595e+09	1.23165e+09	1.18867e+09	1.14977e+09	1.79677e+09	1.79904e+09	1.81452e+09	1.95942e+09	29.9977	30.2056	29.8742	30.1216	31.2528	31.1652	31.2784	31.3839	30.7303	30.8765	30.6827	30.7707	30.3473	30.1979	30.1467	30.0987	30.7428	30.7446	30.7569	30.8678
P40224	SDF1_MOUSE	Stromal cell-derived factor 1 OS=Mus musculus GN=Cxcl12 PE=2 SV=2	Cxcl12 Sdf1	1.58637e+09	1.48809e+09	1.52294e+09	1.64144e+09	1.36069e+09	1.23326e+09	1.15109e+09	1.58178e+09	1.51197e+09	1.3209e+09	2.06792e+09	1.77268e+09	2.12028e+09	2.0184e+09	1.7156e+09	1.87981e+09	2.3217e+09	1.6785e+09	2.16961e+09	2.13988e+09	30.5631	30.4708	30.5042	30.6123	30.3417	30.1998	30.1004	30.5589	30.4938	30.2989	30.9455	30.7233	30.9816	30.9106	30.6761	30.8079	31.1125	30.6445	31.0148	30.9949
Q5MJS3	DMP4_MOUSE	Extracellular serine/threonine protein kinase FAM20C OS=Mus musculus GN=Fam20c PE=2 SV=1	Fam20c Dmp4 Kiaa4081	1.41703e+09	2.28154e+09	1.40202e+09	2.23395e+09	1.68893e+09	1.6271e+09	1.79514e+09	1.87108e+09	1.37721e+09	1.6767e+09	1.47761e+09	1.35521e+09	1.7072e+09	1.43484e+09	1.25411e+09	1.52836e+09	1.47758e+09	2.25184e+09	1.52334e+09	1.8815e+09	30.4002	31.0874	30.3849	31.0569	30.6535	30.5997	30.7414	30.8012	30.3591	30.643	30.4606	30.3359	30.669	30.4182	30.224	30.5093	30.4606	31.0685	30.5046	30.8092
Q06890	CLUS_MOUSE	Clusterin OS=Mus musculus GN=Clu PE=1 SV=1	Clu Apoj Msgp-2	1.65222e+09	1.2299e+09	1.68538e+09	1.38488e+09	1.33495e+09	1.46239e+09	1.52175e+09	1.25843e+09	1.78483e+09	1.73433e+09	1.79886e+09	2.09749e+09	1.81674e+09	1.98575e+09	2.14784e+09	2.01208e+09	1.47642e+09	1.48037e+09	1.68121e+09	1.59595e+09	30.6218	30.1959	30.6504	30.3671	30.3141	30.4457	30.5031	30.229	30.7331	30.6917	30.7444	30.966	30.7587	30.887	31.0002	30.906	30.4595	30.4633	30.6469	30.5718
P35951	LDLR_MOUSE	Low-density lipoprotein receptor OS=Mus musculus GN=Ldlr PE=1 SV=2	Ldlr	1.55657e+09	1.60691e+09	1.8978e+09	1.904e+09	1.5934e+09	1.60061e+09	1.48322e+09	1.34924e+09	1.67366e+09	1.5919e+09	1.88812e+09	1.59249e+09	1.58918e+09	1.80244e+09	1.92727e+09	1.53832e+09	1.53167e+09	1.60329e+09	1.8278e+09	1.57086e+09	30.5357	30.5816	30.8217	30.8264	30.5695	30.576	30.4661	30.3295	30.6404	30.5681	30.8143	30.5686	30.5656	30.7473	30.8439	30.5187	30.5125	30.5784	30.7675	30.5489
Q8BWZ3	NAA25_MOUSE	N-alpha-acetyltransferase 25, NatB auxiliary subunit OS=Mus musculus GN=Naa25 PE=1 SV=1	Naa25 Mdm20	1.4454e+09	2.11056e+09	1.44313e+09	1.86735e+09	1.77008e+09	1.2222e+09	1.1897e+09	1.42731e+09	1.53196e+09	1.56638e+09	1.5484e+09	1.58684e+09	1.2735e+09	1.39731e+09	9.20565e+08	1.50222e+09	2.04053e+09	2.81803e+09	2.12522e+09	2.25354e+09	30.4288	30.975	30.4266	30.7983	30.7212	30.1868	30.1479	30.4107	30.5127	30.5448	30.5281	30.5635	30.2462	30.38	29.7779	30.4844	30.9263	31.392	30.985	31.0695
Q9Z140	CPNE6_MOUSE	Copine-6 OS=Mus musculus GN=Cpne6 PE=1 SV=1	Cpne6	1.59096e+09	2.12038e+09	1.16746e+09	1.69096e+09	1.95908e+09	1.35103e+09	1.56764e+09	2.51314e+09	1.21115e+09	1.79006e+09	1.55679e+09	1.34049e+09	1.1774e+09	1.30719e+09	1.3292e+09	1.36868e+09	1.16519e+09	2.62318e+09	1.52626e+09	2.24094e+09	30.5673	30.9817	30.1207	30.6552	30.8675	30.3314	30.546	31.2268	30.1737	30.7374	30.5359	30.3201	30.133	30.2838	30.3079	30.3501	30.1179	31.2887	30.5074	31.0615
Q69ZN7	MYOF_MOUSE	Myoferlin OS=Mus musculus GN=Myof PE=1 SV=2	Myof Fer1l3 Kiaa1207	1.47885e+09	1.38475e+09	1.32188e+09	1.3771e+09	1.38873e+09	1.26434e+09	1.2619e+09	1.33171e+09	1.7976e+09	1.86647e+09	1.85159e+09	1.87725e+09	1.70203e+09	1.50662e+09	1.62007e+09	1.49512e+09	2.1359e+09	1.71719e+09	2.05951e+09	1.96827e+09	30.4618	30.367	30.2999	30.359	30.3711	30.2357	30.2329	30.3106	30.7434	30.7977	30.7861	30.806	30.6646	30.4887	30.5934	30.4776	30.9922	30.6774	30.9397	30.8743
Q3UH60	DIP2B_MOUSE	Disco-interacting protein 2 homolog B OS=Mus musculus GN=Dip2b PE=1 SV=1	Dip2b Kiaa1463	1.97054e+09	1.24782e+09	2.32439e+09	1.73204e+09	1.58725e+09	1.70716e+09	1.42441e+09	1.31948e+09	1.81308e+09	1.39459e+09	1.60305e+09	1.83138e+09	8.97616e+08	1.87281e+09	1.98742e+09	2.19332e+09	1.20576e+09	1.25971e+09	1.35688e+09	1.61965e+09	30.8759	30.2168	31.1142	30.6898	30.5639	30.6689	30.4077	30.2973	30.7558	30.3772	30.5782	30.7703	29.7415	30.8026	30.8883	31.0305	30.1673	30.2304	30.3377	30.593
Q9QZQ1	AFAD_MOUSE	Afadin OS=Mus musculus GN=Mllt4 PE=1 SV=3	Afdn Af6 Mllt4	1.58357e+09	1.71646e+09	1.65374e+09	1.52356e+09	1.41923e+09	1.73256e+09	1.50923e+09	1.37646e+09	1.62351e+09	1.75382e+09	1.5304e+09	1.74596e+09	1.62336e+09	1.76845e+09	1.65207e+09	1.67556e+09	1.66091e+09	1.56899e+09	1.45131e+09	1.6517e+09	30.5605	30.6768	30.6231	30.5048	30.4025	30.6903	30.4912	30.3583	30.5965	30.7079	30.5113	30.7014	30.5963	30.7198	30.6216	30.642	30.6293	30.5472	30.4347	30.6213
P06745	G6PI_MOUSE	Glucose-6-phosphate isomerase OS=Mus musculus GN=Gpi PE=1 SV=4	Gpi Gpi1	1.6895e+09	1.59256e+09	1.72085e+09	1.56321e+09	1.41963e+09	1.52595e+09	1.4863e+09	1.5489e+09	1.5873e+09	1.55639e+09	1.67922e+09	1.64789e+09	1.64645e+09	1.68049e+09	1.7645e+09	1.64276e+09	1.50699e+09	1.68704e+09	1.4984e+09	1.54308e+09	30.654	30.5687	30.6805	30.5419	30.4029	30.5071	30.4691	30.5286	30.5639	30.5356	30.6451	30.618	30.6167	30.6462	30.7166	30.6135	30.489	30.6518	30.4808	30.5232
P54761	EPHB4_MOUSE	Ephrin type-B receptor 4 OS=Mus musculus GN=Ephb4 PE=1 SV=2	Ephb4 Htk Mdk2 Myk1	1.55335e+09	1.92561e+09	1.47077e+09	1.21649e+09	1.18912e+09	1.36122e+09	1.22675e+09	9.58082e+08	1.30525e+09	1.38695e+09	1.77035e+09	1.66989e+09	2.31412e+09	1.51473e+09	1.98066e+09	1.42299e+09	3.43436e+09	1.18301e+09	1.57517e+09	1.29299e+09	30.5327	30.8427	30.4539	30.1801	30.1472	30.3423	30.1922	29.8356	30.2817	30.3693	30.7214	30.6371	31.1078	30.4964	30.8833	30.4063	31.6774	30.1398	30.5529	30.2681
Q9QZF2	GPC1_MOUSE	Glypican-1 OS=Mus musculus GN=Gpc1 PE=1 SV=1	Gpc1	1.28219e+09	1.54326e+09	8.3662e+08	1.39989e+09	1.11152e+09	9.94774e+08	1.0524e+09	1.2462e+09	1.59584e+09	1.74562e+09	1.63663e+09	1.40233e+09	1.3473e+09	1.33075e+09	1.12416e+09	1.1643e+09	3.12447e+09	2.36404e+09	2.88404e+09	2.51147e+09	30.256	30.5233	29.64	30.3827	30.0499	29.8898	29.971	30.2149	30.5717	30.7011	30.6081	30.3852	30.3274	30.3096	30.0662	30.1168	31.541	31.1386	31.4254	31.2259
P17225	PTBP1_MOUSE	Polypyrimidine tract-binding protein 1 OS=Mus musculus GN=Ptbp1 PE=1 SV=2	Ptbp1 Ptb	3.47884e+08	1.17664e+08	1.56917e+08	1.57438e+08	8.46764e+07	6.35945e+07	9.23222e+07	4.09739e+07	9.59996e+08	6.33172e+08	5.84092e+08	1.71956e+09	2.28759e+09	5.37383e+09	6.64809e+09	3.22941e+09	5.69167e+08	2.91892e+09	4.15465e+09	1.53747e+09	28.374	26.8101	27.2254	27.2302	26.3355	25.9224	26.4602	25.2882	29.8385	29.238	29.1216	30.6794	31.0912	32.3233	32.6303	31.5886	29.0843	31.4428	31.9521	30.5179
A2AKG8	FOCAD_MOUSE	Focadhesin OS=Mus musculus GN=Focad PE=2 SV=1	Focad Kiaa1797	1.92285e+09	1.40289e+09	2.54347e+09	1.69229e+09	1.28622e+09	1.71416e+09	1.21258e+09	1.29984e+09	1.78182e+09	1.40893e+09	1.7196e+09	2.23382e+09	1.33164e+09	1.67737e+09	1.88656e+09	1.73036e+09	1.23245e+09	1.09022e+09	1.46452e+09	1.01343e+09	30.8406	30.3858	31.2441	30.6563	30.2605	30.6749	30.1754	30.2757	30.7307	30.392	30.6794	31.0569	30.3106	30.6436	30.8131	30.6884	30.1989	30.022	30.4478	29.9166
P28660	NCKP1_MOUSE	Nck-associated protein 1 OS=Mus musculus GN=Nckap1 PE=1 SV=2	Nckap1 Hem2 Kiaa0587 Nap1	1.66639e+09	1.35413e+09	1.57389e+09	1.33446e+09	1.58286e+09	1.38965e+09	1.42896e+09	1.44331e+09	1.66239e+09	1.32831e+09	1.67867e+09	1.66688e+09	2.01647e+09	1.83019e+09	1.92373e+09	1.48738e+09	1.82872e+09	1.34892e+09	1.79878e+09	1.26359e+09	30.6341	30.3347	30.5517	30.3136	30.5599	30.3721	30.4123	30.4267	30.6306	30.3069	30.6447	30.6345	30.9092	30.7693	30.8413	30.4701	30.7682	30.3292	30.7444	30.2349
Q9D5U8	CNBD2_MOUSE	Cyclic nucleotide-binding domain-containing protein 2 OS=Mus musculus GN=Cnbd2 PE=1 SV=2	Cnbd2 Cris	1.54977e+09	1.20138e+09	1.64867e+09	1.37482e+09	1.28196e+09	1.65557e+09	1.24876e+09	1.22048e+09	1.72316e+09	1.61847e+09	1.63519e+09	1.74205e+09	1.66645e+09	1.8484e+09	1.91873e+09	1.71217e+09	1.59459e+09	1.22864e+09	1.60559e+09	1.56508e+09	30.5294	30.162	30.6187	30.3566	30.2557	30.6247	30.2178	30.1848	30.6824	30.592	30.6068	30.6981	30.6341	30.7836	30.8375	30.6732	30.5705	30.1944	30.5805	30.5436
Q7TSE6	ST38L_MOUSE	Serine/threonine-protein kinase 38-like OS=Mus musculus GN=Stk38l PE=1 SV=2	Stk38l Ndr2	1.3154e+09	1.35784e+09	1.3843e+09	1.3507e+09	1.5113e+09	1.66681e+09	1.65545e+09	1.42379e+09	1.60541e+09	1.67415e+09	1.72273e+09	1.47701e+09	1.63386e+09	1.48082e+09	1.67829e+09	1.59691e+09	1.56467e+09	1.62593e+09	1.45958e+09	1.63262e+09	30.2929	30.3387	30.3665	30.3311	30.4931	30.6344	30.6246	30.4071	30.5803	30.6408	30.6821	30.46	30.6056	30.4638	30.6443	30.5726	30.5432	30.5986	30.4429	30.6045
P27546	MAP4_MOUSE	Microtubule-associated protein 4 OS=Mus musculus GN=Map4 PE=1 SV=3	Map4 Mtap4	1.48797e+09	1.78827e+09	1.66609e+09	1.78742e+09	1.59014e+09	1.52462e+09	1.45552e+09	1.42906e+09	1.4521e+09	1.43732e+09	1.39418e+09	1.51607e+09	1.36513e+09	1.501e+09	1.4156e+09	1.53567e+09	1.45687e+09	1.63585e+09	1.58677e+09	1.72161e+09	30.4707	30.7359	30.6338	30.7352	30.5665	30.5058	30.4389	30.4124	30.4355	30.4207	30.3768	30.4977	30.3464	30.4833	30.3988	30.5162	30.4402	30.6074	30.5634	30.6811
Q9QY23	PKP3_MOUSE	Plakophilin-3 OS=Mus musculus GN=Pkp3 PE=1 SV=2	Pkp3	1.46541e+09	1.4569e+09	1.4137e+09	1.36241e+09	1.30808e+09	1.4451e+09	1.50978e+09	1.49239e+09	1.69358e+09	1.88935e+09	1.54522e+09	1.52799e+09	1.812e+09	1.46643e+09	1.64167e+09	1.42972e+09	1.39565e+09	1.75738e+09	1.48761e+09	1.60299e+09	30.4487	30.4403	30.3968	30.3435	30.2848	30.4285	30.4917	30.475	30.6574	30.8152	30.5252	30.509	30.7549	30.4497	30.6125	30.4131	30.3783	30.7108	30.4704	30.5781
P97464	EXT1_MOUSE	Exostosin-1 OS=Mus musculus GN=Ext1 PE=1 SV=1	Ext1	1.65128e+09	1.5441e+09	1.70524e+09	1.55929e+09	1.36993e+09	1.44535e+09	1.28901e+09	1.37825e+09	1.58046e+09	1.5207e+09	1.5778e+09	1.6394e+09	1.62027e+09	1.60463e+09	1.73261e+09	1.6024e+09	1.50531e+09	1.39646e+09	1.46746e+09	1.44059e+09	30.6209	30.5241	30.6673	30.5382	30.3515	30.4288	30.2636	30.3602	30.5577	30.5021	30.5553	30.6105	30.5936	30.5796	30.6903	30.5776	30.4874	30.3791	30.4507	30.424
Q91VC4	PLVAP_MOUSE	Plasmalemma vesicle-associated protein OS=Mus musculus GN=Plvap PE=2 SV=1	Plvap Pv1	1.37819e+09	1.42775e+09	1.67252e+09	1.90591e+09	1.62675e+09	1.52463e+09	1.52644e+09	1.20401e+09	1.4955e+09	1.67751e+09	1.68108e+09	1.4048e+09	1.30732e+09	1.53402e+09	1.74317e+09	1.45323e+09	1.24679e+09	1.60515e+09	1.78938e+09	1.39799e+09	30.3601	30.4111	30.6394	30.8278	30.5993	30.5058	30.5075	30.1652	30.478	30.6437	30.6467	30.3877	30.284	30.5147	30.6991	30.4366	30.2156	30.5801	30.7368	30.3807
Q61982	NOTC3_MOUSE	Neurogenic locus notch homolog protein 3 OS=Mus musculus GN=Notch3 PE=1 SV=1	Notch3	1.46824e+09	1.59669e+09	1.53331e+09	1.55752e+09	1.3723e+09	1.5725e+09	1.5418e+09	1.34703e+09	1.45578e+09	1.56466e+09	1.51251e+09	1.63815e+09	1.49082e+09	1.6184e+09	1.62602e+09	1.52499e+09	1.37436e+09	1.58307e+09	1.35969e+09	1.67048e+09	30.4514	30.5724	30.514	30.5366	30.3539	30.5504	30.522	30.3271	30.4391	30.5432	30.4943	30.6094	30.4735	30.5919	30.5987	30.5062	30.3561	30.5601	30.3406	30.6376
G5E829	AT2B1_MOUSE	Plasma membrane calcium-transporting ATPase 1 OS=Mus musculus GN=Atp2b1 PE=1 SV=1	Atp2b1	1.62725e+09	1.74614e+09	1.76616e+09	1.6163e+09	1.6293e+09	1.37526e+09	1.43437e+09	1.64932e+09	1.51215e+09	1.40814e+09	1.55895e+09	1.78701e+09	1.45016e+09	1.34096e+09	1.26892e+09	1.13511e+09	1.75107e+09	1.63909e+09	1.30415e+09	1.38295e+09	30.5998	30.7015	30.718	30.5901	30.6016	30.3571	30.4178	30.6192	30.494	30.3911	30.5379	30.7349	30.4336	30.3206	30.241	30.0802	30.7056	30.6102	30.2805	30.3651
P14685	PSMD3_MOUSE	26S proteasome non-ATPase regulatory subunit 3 OS=Mus musculus GN=Psmd3 PE=1 SV=3	Psmd3 P91a Tstap91a	1.42031e+09	1.57539e+09	1.53498e+09	1.45604e+09	1.71323e+09	1.85623e+09	1.94508e+09	1.67343e+09	1.43347e+09	1.51203e+09	1.46622e+09	1.45358e+09	1.41013e+09	1.42737e+09	1.54757e+09	1.38636e+09	1.36817e+09	1.42173e+09	1.33345e+09	1.42531e+09	30.4036	30.5531	30.5156	30.4394	30.6741	30.7897	30.8572	30.6402	30.4169	30.4938	30.4495	30.437	30.3932	30.4107	30.5274	30.3687	30.3496	30.405	30.3125	30.4086
Q9CRB5	PR7C1_MOUSE	Prolactin-7C1 OS=Mus musculus GN=Prl7c1 PE=2 SV=1	Prl7c1 Prlpo	1.48134e+09	1.51804e+09	1.57873e+09	1.41076e+09	1.39703e+09	1.46563e+09	1.25331e+09	1.41837e+09	1.63565e+09	1.59257e+09	1.54828e+09	1.5639e+09	1.58195e+09	1.58508e+09	1.58666e+09	1.49041e+09	1.45491e+09	1.70685e+09	1.42823e+09	1.56808e+09	30.4643	30.4996	30.5561	30.3938	30.3797	30.4489	30.2231	30.4016	30.6072	30.5687	30.528	30.5425	30.5591	30.5619	30.5633	30.4731	30.4383	30.6687	30.4116	30.5463
Q924C6	LOXL4_MOUSE	Lysyl oxidase homolog 4 OS=Mus musculus GN=Loxl4 PE=2 SV=2	Loxl4 Loxc	1.43973e+09	1.58239e+09	1.34104e+09	1.45656e+09	2.32697e+09	1.81179e+09	2.53414e+09	2.79276e+09	1.35214e+09	1.33087e+09	1.26796e+09	1.28959e+09	1.2475e+09	1.28265e+09	1.1319e+09	1.31708e+09	1.21637e+09	1.15476e+09	1.20012e+09	1.13962e+09	30.4231	30.5595	30.3207	30.4399	31.1158	30.7548	31.2389	31.379	30.3326	30.3097	30.2399	30.2643	30.2164	30.2565	30.0761	30.2947	30.1799	30.105	30.1605	30.0859
O70468	MYPC3_MOUSE	Myosin-binding protein C, cardiac-type OS=Mus musculus GN=Mybpc3 PE=1 SV=1	Mybpc3	1.39266e+09	1.41167e+09	1.46881e+09	1.40935e+09	1.37079e+09	1.43076e+09	1.51939e+09	1.39687e+09	1.56796e+09	1.5648e+09	1.57249e+09	1.51229e+09	1.55778e+09	1.65756e+09	1.77649e+09	1.55377e+09	1.42687e+09	1.53293e+09	1.55321e+09	1.51094e+09	30.3752	30.3948	30.452	30.3924	30.3524	30.4141	30.5008	30.3796	30.5462	30.5433	30.5504	30.4941	30.5368	30.6264	30.7264	30.5331	30.4102	30.5136	30.5326	30.4928
Q6P4T2	U520_MOUSE	U5 small nuclear ribonucleoprotein 200 kDa helicase OS=Mus musculus GN=Snrnp200 PE=2 SV=1	Snrnp200 Kiaa0788	1.38787e+09	1.76069e+09	1.3016e+09	1.41763e+09	1.67078e+09	1.52988e+09	1.61727e+09	1.47066e+09	1.76135e+09	1.64102e+09	1.53927e+09	1.29826e+09	1.61819e+09	1.41614e+09	1.4085e+09	1.64893e+09	1.51875e+09	1.28463e+09	1.30208e+09	1.43461e+09	30.3702	30.7135	30.2776	30.4008	30.6379	30.5108	30.5909	30.4538	30.714	30.6119	30.5196	30.2739	30.5917	30.3993	30.3915	30.6189	30.5002	30.2587	30.2782	30.418
Q9QUR6	PPCE_MOUSE	Prolyl endopeptidase OS=Mus musculus GN=Prep PE=2 SV=1	Prep Pep	1.48986e+09	1.48784e+09	1.44683e+09	1.51395e+09	1.59318e+09	1.63136e+09	1.59949e+09	1.52452e+09	1.46964e+09	1.42938e+09	1.46376e+09	1.37854e+09	1.53325e+09	1.42582e+09	1.32239e+09	1.58544e+09	1.36161e+09	1.47542e+09	1.36493e+09	1.49901e+09	30.4725	30.4706	30.4303	30.4957	30.5693	30.6034	30.575	30.5057	30.4528	30.4127	30.447	30.3605	30.5139	30.4091	30.3005	30.5622	30.3427	30.4585	30.3462	30.4814
Q61092	LAMC2_MOUSE	Laminin subunit gamma-2 OS=Mus musculus GN=Lamc2 PE=1 SV=2	Lamc2	8.33826e+08	1.05027e+09	8.50062e+08	9.38601e+08	1.7044e+09	1.35996e+09	2.04885e+09	2.40625e+09	1.30059e+09	1.45608e+09	1.08356e+09	1.27976e+09	1.55294e+09	1.23466e+09	1.13929e+09	1.39229e+09	2.00659e+09	1.88703e+09	1.66819e+09	1.76339e+09	29.6352	29.9681	29.663	29.8059	30.6666	30.3409	30.9322	31.1641	30.2765	30.4394	30.0131	30.2532	30.5324	30.2015	30.0855	30.3748	30.9021	30.8135	30.6356	30.7157
Q9DCD0	6PGD_MOUSE	6-phosphogluconate dehydrogenase, decarboxylating OS=Mus musculus GN=Pgd PE=2 SV=3	Pgd	1.41265e+09	1.50534e+09	1.51719e+09	1.4603e+09	1.29804e+09	1.47447e+09	1.41154e+09	1.26957e+09	1.48562e+09	1.45747e+09	1.39542e+09	1.38886e+09	1.48452e+09	1.54428e+09	1.48726e+09	1.50646e+09	1.37198e+09	1.4477e+09	1.32921e+09	1.45315e+09	30.3958	30.4874	30.4988	30.4436	30.2737	30.4576	30.3946	30.2417	30.4684	30.4408	30.378	30.3713	30.4673	30.5243	30.47	30.4885	30.3536	30.4311	30.3079	30.4365
Q9CZE3	RAB32_MOUSE	Ras-related protein Rab-32 OS=Mus musculus GN=Rab32 PE=2 SV=3	Rab32	1.29805e+09	1.25458e+09	1.36003e+09	1.35928e+09	1.29973e+09	1.49275e+09	1.49408e+09	1.27359e+09	1.49054e+09	1.61336e+09	1.43475e+09	1.36561e+09	1.38237e+09	1.45836e+09	1.53724e+09	1.41197e+09	1.35433e+09	1.57172e+09	1.40746e+09	1.58744e+09	30.2737	30.2246	30.341	30.3402	30.2756	30.4753	30.4766	30.2463	30.4732	30.5874	30.4181	30.3469	30.3645	30.4417	30.5177	30.3951	30.3349	30.5497	30.3904	30.5641
Q9R0N0	GALK1_MOUSE	Galactokinase OS=Mus musculus GN=Galk1 PE=2 SV=1	Galk1 Galk Glk	1.21386e+09	1.40181e+09	1.26386e+09	1.28896e+09	1.18899e+09	1.37671e+09	1.35562e+09	1.1698e+09	1.4858e+09	1.55242e+09	1.58155e+09	1.35896e+09	1.83119e+09	1.55424e+09	1.63218e+09	1.35912e+09	1.48732e+09	1.53464e+09	1.30194e+09	1.4935e+09	30.177	30.3846	30.2352	30.2636	30.1471	30.3586	30.3363	30.1236	30.4686	30.5319	30.5587	30.3399	30.7701	30.5336	30.6041	30.34	30.4701	30.5152	30.278	30.4761
A3KFM7	CHD6_MOUSE	Chromodomain-helicase-DNA-binding protein 6 OS=Mus musculus GN=Chd6 PE=1 SV=1	Chd6 Kiaa1335	1.47378e+09	1.23647e+09	1.64931e+09	1.38745e+09	1.17224e+09	1.4081e+09	1.20357e+09	1.28696e+09	1.51897e+09	1.44764e+09	1.31858e+09	1.79211e+09	1.46547e+09	1.57951e+09	1.6324e+09	1.55135e+09	1.27272e+09	1.3231e+09	1.30055e+09	1.39952e+09	30.4569	30.2036	30.6192	30.3698	30.1266	30.3911	30.1647	30.2613	30.5005	30.4311	30.2963	30.739	30.4487	30.5568	30.6043	30.5309	30.2453	30.3013	30.2765	30.3823
P70460	VASP_MOUSE	Vasodilator-stimulated phosphoprotein OS=Mus musculus GN=Vasp PE=1 SV=4	Vasp	1.62155e+09	1.08991e+09	1.67787e+09	1.40929e+09	1.3955e+09	1.34197e+09	1.13261e+09	1.19665e+09	1.45879e+09	1.36593e+09	1.38812e+09	1.63632e+09	1.51507e+09	1.66937e+09	1.50677e+09	1.6423e+09	1.28307e+09	1.19856e+09	1.55209e+09	1.22401e+09	30.5947	30.0216	30.644	30.3923	30.3781	30.3217	30.077	30.1563	30.4421	30.3472	30.3705	30.6078	30.4967	30.6367	30.4888	30.6131	30.257	30.1587	30.5316	30.189
Q91VU0	FAM3C_MOUSE	Protein FAM3C OS=Mus musculus GN=Fam3c PE=1 SV=1	Fam3c D6Wsu176e Ilei	1.8378e+09	1.19578e+09	1.87076e+09	1.58249e+09	1.29553e+09	1.16415e+09	7.69825e+08	1.2545e+09	1.3978e+09	9.04495e+08	1.39482e+09	1.91011e+09	1.6038e+09	1.68314e+09	1.12878e+09	1.64066e+09	1.90319e+09	1.01231e+09	1.71717e+09	1.00959e+09	30.7753	30.1553	30.801	30.5595	30.2709	30.1166	29.52	30.2245	30.3805	29.7525	30.3774	30.831	30.5788	30.6485	30.0721	30.6116	30.8258	29.915	30.6774	29.9111
Q9Z0U1	ZO2_MOUSE	Tight junction protein ZO-2 OS=Mus musculus GN=Tjp2 PE=1 SV=2	Tjp2 Zo2	1.30126e+09	1.24307e+09	1.63714e+09	1.59946e+09	1.41355e+09	1.49233e+09	1.31256e+09	9.38939e+08	1.66523e+09	1.85925e+09	1.48346e+09	1.41861e+09	1.35099e+09	1.37443e+09	1.51791e+09	1.4845e+09	1.36072e+09	1.26213e+09	1.21374e+09	1.26608e+09	30.2773	30.2113	30.6085	30.5749	30.3967	30.4749	30.2897	29.8065	30.6331	30.7921	30.4663	30.4018	30.3314	30.3562	30.4994	30.4673	30.3417	30.2332	30.1768	30.2377
Q8BH00	AL8A1_MOUSE	Aldehyde dehydrogenase family 8 member A1 OS=Mus musculus GN=Aldh8a1 PE=1 SV=1	Aldh8a1 Raldh4	1.79526e+09	1.04098e+09	2.13947e+09	1.26976e+09	8.77107e+08	1.34235e+09	9.34891e+08	1.07461e+09	1.695e+09	1.57311e+09	1.19773e+09	1.82737e+09	1.57593e+09	1.52775e+09	1.55284e+09	1.43468e+09	1.10436e+09	1.31399e+09	1.18035e+09	1.26238e+09	30.7415	29.9553	30.9946	30.2419	29.7082	30.3221	29.8002	30.0012	30.6586	30.551	30.1577	30.7671	30.5536	30.5088	30.5323	30.4181	30.0406	30.2913	30.1366	30.2335
P26231	CTNA1_MOUSE	Catenin alpha-1 OS=Mus musculus GN=Ctnna1 PE=1 SV=1	Ctnna1 Catna1	1.20756e+09	1.27991e+09	1.13085e+09	1.28663e+09	1.48427e+09	1.38425e+09	1.39913e+09	1.5681e+09	1.39486e+09	1.52726e+09	1.41724e+09	1.49524e+09	1.2367e+09	1.2607e+09	1.37911e+09	1.24488e+09	1.45204e+09	1.52114e+09	1.53166e+09	1.50348e+09	30.1695	30.2534	30.0748	30.261	30.4671	30.3665	30.3819	30.5464	30.3775	30.5083	30.4004	30.4777	30.2039	30.2316	30.3611	30.2134	30.4354	30.5025	30.5125	30.4857
Q99K85	SERC_MOUSE	Phosphoserine aminotransferase OS=Mus musculus GN=Psat1 PE=1 SV=1	Psat1 Psa Psat	1.3589e+09	1.41893e+09	1.37195e+09	1.46757e+09	1.27224e+09	1.31539e+09	1.3697e+09	1.26599e+09	1.45982e+09	1.42983e+09	1.49655e+09	1.33978e+09	1.45107e+09	1.37125e+09	1.44445e+09	1.44511e+09	1.23892e+09	1.4001e+09	1.37071e+09	1.40048e+09	30.3398	30.4022	30.3536	30.4508	30.2447	30.2928	30.3512	30.2376	30.4431	30.4132	30.479	30.3193	30.4345	30.3528	30.4279	30.4285	30.2064	30.3829	30.3523	30.3833
Q03734	SPA3M_MOUSE	Serine protease inhibitor A3M OS=Mus musculus GN=Serpina3m PE=1 SV=2	Serpina3m	1.00418e+09	1.24674e+09	1.256e+09	2.55418e+09	1.17747e+09	1.0053e+09	1.71787e+09	7.8985e+08	1.00369e+09	1.05387e+09	2.28608e+09	1.06376e+09	1.02967e+09	1.27609e+09	1.88437e+09	1.05694e+09	1.12618e+09	1.54908e+09	2.41677e+09	1.13554e+09	29.9034	30.2155	30.2262	31.2502	30.133	29.905	30.678	29.557	29.9027	29.9731	31.0902	29.9865	29.9395	30.2491	30.8114	29.9773	30.0688	30.5288	31.1704	30.0807
P97798	NEO1_MOUSE	Neogenin OS=Mus musculus GN=Neo1 PE=1 SV=1	Neo1 Ngn	1.27566e+09	1.39221e+09	1.28591e+09	1.34947e+09	1.18301e+09	1.33196e+09	1.26491e+09	1.16238e+09	1.42892e+09	1.44461e+09	1.35279e+09	1.33303e+09	1.45281e+09	1.46867e+09	1.48926e+09	1.45293e+09	1.41603e+09	1.38489e+09	1.30115e+09	1.46058e+09	30.2486	30.3747	30.2601	30.3297	30.1398	30.3109	30.2364	30.1144	30.4123	30.428	30.3333	30.3121	30.4362	30.4519	30.4719	30.4363	30.3992	30.3671	30.2771	30.4439
Q80SU7	GVIN1_MOUSE	Interferon-induced very large GTPase 1 OS=Mus musculus GN=Gvin1 PE=1 SV=1	Gvin1	1.62084e+09	1.11006e+09	1.57961e+09	1.48248e+09	1.32662e+09	1.20212e+09	1.06084e+09	1.25502e+09	1.3016e+09	1.04836e+09	1.35983e+09	1.62728e+09	1.4505e+09	1.43052e+09	1.31068e+09	1.44725e+09	1.81058e+09	1.15356e+09	1.53183e+09	1.12134e+09	30.5941	30.048	30.5569	30.4654	30.3051	30.1629	29.9826	30.2251	30.2776	29.9655	30.3408	30.5998	30.4339	30.4139	30.2877	30.4307	30.7538	30.1034	30.5126	30.0626
Q9DBJ1	PGAM1_MOUSE	Phosphoglycerate mutase 1 OS=Mus musculus GN=Pgam1 PE=1 SV=3	Pgam1	1.41161e+09	1.21315e+09	1.52085e+09	1.31739e+09	1.39698e+09	1.5479e+09	1.40215e+09	1.52514e+09	1.38461e+09	1.36441e+09	1.33605e+09	1.4247e+09	1.43302e+09	1.33046e+09	1.38198e+09	1.33966e+09	1.23133e+09	1.17827e+09	1.18442e+09	1.24433e+09	30.3947	30.1761	30.5022	30.295	30.3797	30.5277	30.385	30.5063	30.3668	30.3456	30.3153	30.408	30.4164	30.3093	30.3641	30.3192	30.1976	30.134	30.1415	30.2127
O88990	ACTN3_MOUSE	Alpha-actinin-3 OS=Mus musculus GN=Actn3 PE=2 SV=1	Actn3	1.01988e+09	1.36704e+09	7.31387e+08	9.56737e+08	1.81208e+09	1.46887e+09	1.29951e+09	1.50699e+09	1.36077e+09	1.53686e+09	1.40067e+09	1.14369e+09	1.39495e+09	9.96937e+08	9.57215e+08	9.1935e+08	1.75377e+09	1.77037e+09	1.80053e+09	1.85262e+09	29.9258	30.3484	29.4461	29.8335	30.755	30.4521	30.2753	30.489	30.3418	30.5173	30.3835	30.091	30.3776	29.8929	29.8343	29.776	30.7078	30.7214	30.7458	30.7869
Q99PL5	RRBP1_MOUSE	Ribosome-binding protein 1 OS=Mus musculus GN=Rrbp1 PE=2 SV=2	Rrbp1	1.22377e+09	1.39732e+09	1.25892e+09	1.3378e+09	1.35025e+09	1.38073e+09	1.32886e+09	1.19947e+09	1.44556e+09	1.49028e+09	1.34903e+09	1.33161e+09	1.39347e+09	1.42269e+09	1.34483e+09	1.43426e+09	1.24214e+09	1.31434e+09	1.24586e+09	1.49675e+09	30.1887	30.38	30.2295	30.3172	30.3306	30.3628	30.3075	30.1597	30.429	30.4729	30.3293	30.3105	30.376	30.406	30.3248	30.4177	30.2102	30.2917	30.2145	30.4792
P37889	FBLN2_MOUSE	Fibulin-2 OS=Mus musculus GN=Fbln2 PE=1 SV=2	Fbln2	1.50381e+09	1.38673e+09	1.23468e+09	1.41572e+09	1.8933e+09	1.79034e+09	1.91763e+09	2.19518e+09	1.04114e+09	1.19638e+09	1.20217e+09	1.11143e+09	1.23824e+09	1.2828e+09	1.23322e+09	1.38495e+09	8.8219e+08	1.03258e+09	9.11689e+08	9.28666e+08	30.486	30.369	30.2015	30.3989	30.8183	30.7376	30.8367	31.0317	29.9555	30.156	30.163	30.0498	30.2056	30.2567	30.1998	30.3672	29.7165	29.9436	29.764	29.7906
Q923D2	BLVRB_MOUSE	Flavin reductase (NADPH) OS=Mus musculus GN=Blvrb PE=2 SV=3	Blvrb	1.27667e+09	1.22191e+09	1.40641e+09	1.3244e+09	1.28113e+09	1.40401e+09	1.2966e+09	1.1251e+09	1.32022e+09	1.32791e+09	1.3609e+09	1.33818e+09	1.34163e+09	1.42656e+09	1.43796e+09	1.57372e+09	1.24696e+09	1.31704e+09	1.2484e+09	1.35582e+09	30.2497	30.1865	30.3894	30.3027	30.2548	30.3869	30.2721	30.0674	30.2981	30.3065	30.3419	30.3176	30.3213	30.4099	30.4214	30.5515	30.2158	30.2947	30.2174	30.3365
Q99JW4	LIMS1_MOUSE	LIM and senescent cell antigen-like-containing domain protein 1 OS=Mus musculus GN=Lims1 PE=1 SV=3	Lims1 Pinch1	1.21219e+09	1.41171e+09	1.23638e+09	1.41017e+09	1.34435e+09	1.29334e+09	1.36378e+09	1.22555e+09	1.41492e+09	1.3788e+09	1.35159e+09	1.12176e+09	1.36749e+09	1.45481e+09	1.29601e+09	1.41777e+09	1.11936e+09	1.42221e+09	1.30168e+09	1.35586e+09	30.175	30.3948	30.2035	30.3932	30.3243	30.2685	30.345	30.1908	30.3981	30.3608	30.332	30.0631	30.3489	30.4382	30.2714	30.401	30.06	30.4055	30.2777	30.3366
Q8BZ32	ASXL2_MOUSE	Putative Polycomb group protein ASXL2 OS=Mus musculus GN=Asxl2 PE=2 SV=1	Asxl2 Kiaa1685	1.37388e+09	1.28617e+09	1.55773e+09	1.39043e+09	1.04388e+09	1.36943e+09	1.27942e+09	1.0366e+09	1.23547e+09	1.31216e+09	1.30556e+09	1.61845e+09	1.2579e+09	1.47956e+09	1.60024e+09	1.29583e+09	1.17442e+09	1.2723e+09	1.29685e+09	1.26118e+09	30.3556	30.2604	30.5368	30.3729	29.9593	30.3509	30.2528	29.9492	30.2024	30.2893	30.282	30.592	30.2284	30.4625	30.5756	30.2712	30.1293	30.2448	30.2724	30.2321
Q9CXH7	SGOL1_MOUSE	Shugoshin-like 1 OS=Mus musculus GN=Sgol1 PE=2 SV=1	Sgo1 Sgol1	1.45202e+09	1.29011e+09	1.44691e+09	1.29097e+09	1.02587e+09	1.14729e+09	9.36974e+08	1.06672e+09	1.33817e+09	1.35231e+09	1.29819e+09	1.38056e+09	1.47742e+09	1.5243e+09	1.66093e+09	1.36677e+09	1.72968e+09	8.64082e+08	1.51049e+09	1.18472e+09	30.4354	30.2648	30.4303	30.2658	29.9342	30.0956	29.8034	29.9905	30.3176	30.3328	30.2739	30.3626	30.4604	30.5055	30.6293	30.3481	30.6879	29.6866	30.4924	30.1419
Q8JZM8	MUC4_MOUSE	Mucin-4 OS=Mus musculus GN=Muc4 PE=2 SV=1	Muc4	6.95968e+08	2.04866e+09	8.29148e+08	4.47606e+09	1.41052e+09	1.48686e+09	1.80246e+09	2.00362e+09	7.01862e+08	1.36118e+09	7.88314e+08	7.85275e+08	1.03696e+09	8.26942e+08	5.3747e+08	1.0007e+09	5.91085e+08	2.11516e+09	8.88767e+08	7.90979e+08	29.3744	30.932	29.6271	32.0596	30.3936	30.4696	30.7473	30.9	29.3866	30.3422	29.5542	29.5486	29.9497	29.6232	29.0016	29.8984	29.1388	30.9781	29.7272	29.5591
Q64096	MCF2L_MOUSE	Guanine nucleotide exchange factor DBS OS=Mus musculus GN=Mcf2l PE=1 SV=2	Mcf2l Dbs	1.2203e+09	1.61091e+09	1.21558e+09	1.41815e+09	1.30731e+09	1.28983e+09	1.43757e+09	1.43543e+09	1.20898e+09	1.30539e+09	1.30352e+09	1.07507e+09	1.24106e+09	1.25177e+09	1.22507e+09	1.25456e+09	1.12002e+09	1.36657e+09	1.20219e+09	1.44919e+09	30.1846	30.5852	30.179	30.4014	30.284	30.2645	30.421	30.4188	30.1711	30.2818	30.2798	30.0018	30.2089	30.2213	30.1902	30.2245	30.0609	30.3479	30.163	30.4326
A2AX52	CO6A4_MOUSE	Collagen alpha-4(VI) chain OS=Mus musculus GN=Col6a4 PE=1 SV=2	Col6a4 Dvwa	1.24161e+09	1.74415e+09	1.38219e+09	9.49094e+08	1.25883e+09	1.27002e+09	8.07378e+08	1.26018e+09	1.15833e+09	1.37874e+09	1.09615e+09	1.36139e+09	1.41958e+09	1.1913e+09	1.00725e+09	1.27715e+09	1.75519e+09	1.9033e+09	1.00875e+09	1.44149e+09	30.2096	30.6999	30.3643	29.822	30.2294	30.2422	29.5887	30.231	30.1094	30.3607	30.0298	30.3424	30.4028	30.1499	29.9078	30.2503	30.709	30.8259	29.9099	30.4249
P61979	HNRPK_MOUSE	Heterogeneous nuclear ribonucleoprotein K OS=Mus musculus GN=Hnrnpk PE=1 SV=1	Hnrnpk Hnrpk	1.43846e+09	1.07589e+09	1.5835e+09	1.37716e+09	1.05149e+09	1.44616e+09	1.06258e+09	1.29593e+09	1.3438e+09	1.34085e+09	1.27479e+09	1.50835e+09	1.13066e+09	1.44464e+09	1.55015e+09	1.44868e+09	9.61183e+08	1.0725e+09	1.40472e+09	1.04854e+09	30.4219	30.0029	30.5605	30.359	29.9698	30.4296	29.9849	30.2713	30.3237	30.3205	30.2476	30.4903	30.0745	30.4281	30.5298	30.4321	29.8402	29.9983	30.3876	29.9657
Q99JW5	EPCAM_MOUSE	Epithelial cell adhesion molecule OS=Mus musculus GN=Epcam PE=2 SV=1	Epcam Tacstd1	1.28803e+09	1.06565e+09	9.22787e+08	1.1694e+09	1.63278e+09	1.33502e+09	1.33018e+09	1.52685e+09	1.31409e+09	1.32515e+09	1.40168e+09	1.53934e+09	1.19877e+09	1.00611e+09	1.09392e+09	9.34192e+08	1.72249e+09	9.88102e+08	1.47908e+09	1.25632e+09	30.2625	29.9891	29.7814	30.1231	30.6047	30.3142	30.309	30.5079	30.2914	30.3035	30.3845	30.5197	30.1589	29.9061	30.0269	29.7991	30.6818	29.8801	30.4621	30.2266
P09535	IGF2_MOUSE	Insulin-like growth factor II OS=Mus musculus GN=Igf2 PE=1 SV=1	Igf2 Igf-2	1.39185e+09	1.24452e+09	1.24103e+09	1.60436e+09	1.09957e+09	1.31101e+09	9.55383e+08	1.00353e+09	1.09418e+09	1.25243e+09	1.13412e+09	1.94466e+09	1.28407e+09	2.07816e+09	1.03485e+09	1.72939e+09	1.20514e+09	9.44043e+08	9.30038e+08	9.65465e+08	30.3744	30.2129	30.2089	30.5793	30.0343	30.288	29.8315	29.9024	30.0272	30.2221	30.0789	30.8569	30.2581	30.9527	29.9468	30.6876	30.1666	29.8143	29.7927	29.8466
Q8CGC7	SYEP_MOUSE	Bifunctional glutamate/proline--tRNA ligase OS=Mus musculus GN=Eprs PE=1 SV=4	Eprs1 Eprs Qprs	1.19664e+09	1.50266e+09	1.19344e+09	1.30094e+09	1.3233e+09	1.20478e+09	1.25857e+09	1.41114e+09	1.17643e+09	1.24079e+09	1.22863e+09	1.13109e+09	1.19987e+09	1.22695e+09	1.19561e+09	1.24964e+09	1.26737e+09	1.42988e+09	1.28489e+09	1.36677e+09	30.1563	30.4849	30.1525	30.2769	30.3015	30.1661	30.2291	30.3942	30.1318	30.2086	30.1944	30.0751	30.1602	30.1924	30.1551	30.2189	30.2392	30.4132	30.259	30.3481
P70452	STX4_MOUSE	Syntaxin-4 OS=Mus musculus GN=Stx4 PE=1 SV=1	Stx4 Stx4a	1.2062e+09	9.4997e+08	1.31642e+09	1.26168e+09	1.31021e+09	1.22189e+09	1.51368e+09	1.13064e+09	1.31565e+09	1.04892e+09	1.52688e+09	1.15673e+09	1.25459e+09	1.20958e+09	2.64927e+09	1.09526e+09	1.1844e+09	8.42769e+08	1.25476e+09	9.18424e+08	30.1678	29.8233	30.294	30.2327	30.2872	30.1865	30.4954	30.0745	30.2931	29.9663	30.5079	30.1074	30.2246	30.1719	31.3029	30.0286	30.1415	29.6506	30.2248	29.7746
O35598	ADA10_MOUSE	Disintegrin and metalloproteinase domain-containing protein 10 OS=Mus musculus GN=Adam10 PE=1 SV=2	Adam10 Kuz Madm	1.13908e+09	1.15498e+09	1.1011e+09	1.15499e+09	1.48905e+09	1.41075e+09	1.53054e+09	1.49928e+09	1.29848e+09	1.36341e+09	1.30239e+09	1.30547e+09	1.27257e+09	1.14423e+09	1.12924e+09	1.05247e+09	1.23858e+09	1.10215e+09	1.21309e+09	1.2908e+09	30.0852	30.1052	30.0363	30.1052	30.4717	30.3938	30.5114	30.4816	30.2742	30.3446	30.2785	30.2819	30.2451	30.0917	30.0727	29.9711	30.206	30.0377	30.176	30.2656
P97430	SLPI_MOUSE	Antileukoproteinase OS=Mus musculus GN=Slpi PE=2 SV=1	Slpi	1.72218e+09	2.43638e+09	1.73705e+09	1.35516e+09	3.14895e+09	2.2589e+09	2.1009e+09	6.38554e+09	4.34128e+08	3.11079e+08	2.83375e+08	3.14405e+08	3.89679e+08	3.28338e+08	2.87434e+08	3.48939e+08	4.02541e+08	3.73252e+08	2.48295e+08	3.09207e+08	30.6816	31.1821	30.694	30.3358	31.5522	31.073	30.9684	32.5722	28.6935	28.2127	28.0781	28.2281	28.5377	28.2906	28.0987	28.3784	28.5846	28.4756	27.8875	28.204
Q9Z1Q9	SYVC_MOUSE	Valine--tRNA ligase OS=Mus musculus GN=Vars PE=2 SV=1	Vars1 Bat6 G7a Vars Vars2	1.23089e+09	1.67331e+09	1.14259e+09	1.6186e+09	1.24251e+09	1.19383e+09	1.3245e+09	1.64361e+09	9.79086e+08	1.20761e+09	9.10947e+08	1.13735e+09	1.27558e+09	1.18866e+09	9.74773e+08	1.16371e+09	1.01111e+09	1.73903e+09	1.31014e+09	1.2064e+09	30.1971	30.6401	30.0897	30.5921	30.2106	30.153	30.3028	30.6142	29.8669	30.1695	29.7628	30.083	30.2485	30.1467	29.8605	30.1161	29.9133	30.6956	30.2871	30.1681
F8VPU2	FARP1_MOUSE	FERM, RhoGEF and pleckstrin domain-containing protein 1 OS=Mus musculus GN=Farp1 PE=1 SV=1	Farp1	1.22838e+09	1.13346e+09	1.22235e+09	1.25099e+09	1.18761e+09	1.30356e+09	1.14168e+09	1.10336e+09	1.26578e+09	1.51151e+09	1.27897e+09	1.4372e+09	1.16535e+09	1.30029e+09	1.26631e+09	1.37337e+09	1.27055e+09	1.08629e+09	1.1813e+09	1.19378e+09	30.1941	30.0781	30.187	30.2204	30.1454	30.2798	30.0885	30.0393	30.2374	30.4933	30.2523	30.4206	30.1181	30.2762	30.238	30.3551	30.2428	30.0168	30.1377	30.1529
P62196	PRS8_MOUSE	26S protease regulatory subunit 8 OS=Mus musculus GN=Psmc5 PE=1 SV=1	Psmc5 Sug1	1.16469e+09	1.09488e+09	1.25812e+09	1.28108e+09	1.10752e+09	1.16582e+09	1.1773e+09	1.03065e+09	1.43117e+09	1.34051e+09	1.41241e+09	1.21678e+09	1.3176e+09	1.25929e+09	1.34535e+09	1.28876e+09	1.20435e+09	1.18096e+09	1.27123e+09	1.24784e+09	30.1173	30.0281	30.2286	30.2547	30.0447	30.1187	30.1328	29.9409	30.4145	30.3201	30.3955	30.1804	30.2953	30.23	30.3253	30.2633	30.1656	30.1373	30.2436	30.2168
Q32NZ6	TMC5_MOUSE	Transmembrane channel-like protein 5 OS=Mus musculus GN=Tmc5 PE=2 SV=1	Tmc5	1.60975e+09	6.6854e+08	1.73137e+09	1.08986e+09	9.24518e+08	9.98041e+08	8.34137e+08	8.3093e+08	1.40275e+09	7.9309e+08	1.46644e+09	1.88024e+09	1.50418e+09	1.63341e+09	1.81561e+09	1.49356e+09	1.37175e+09	5.57434e+08	1.25977e+09	7.64309e+08	30.5842	29.3164	30.6893	30.0215	29.7841	29.8945	29.6357	29.6302	30.3856	29.5629	30.4497	30.8083	30.4863	30.6052	30.7578	30.4761	30.3534	29.0542	30.2305	29.5096
P08775	RPB1_MOUSE	DNA-directed RNA polymerase II subunit RPB1 OS=Mus musculus GN=Polr2a PE=1 SV=3	Polr2a Rpii215 Rpo2-1	1.30947e+09	9.85681e+08	1.31045e+09	1.1942e+09	1.1908e+09	1.26165e+09	9.82552e+08	1.12882e+09	1.21873e+09	1.20625e+09	1.12344e+09	1.47826e+09	1.12939e+09	1.38566e+09	1.38467e+09	1.49256e+09	1.0428e+09	1.16262e+09	1.21349e+09	1.3884e+09	30.2863	29.8765	30.2874	30.1534	30.1493	30.2327	29.872	30.0722	30.1827	30.1679	30.0653	30.4613	30.0729	30.3679	30.3669	30.4751	29.9578	30.1147	30.1765	30.3708
Q8BYK8	ZC3H6_MOUSE	Zinc finger CCCH domain-containing protein 6 OS=Mus musculus GN=Zc3h6 PE=2 SV=2	Zc3h6 Zc3hdc6	1.11464e+09	1.26185e+09	1.19849e+09	1.16839e+09	1.12015e+09	1.28622e+09	1.31648e+09	9.40399e+08	1.27219e+09	1.34959e+09	1.36042e+09	1.15819e+09	1.30703e+09	1.21195e+09	1.42683e+09	1.22244e+09	1.18638e+09	1.34607e+09	1.07665e+09	1.19542e+09	30.0539	30.2329	30.1586	30.1219	30.061	30.2605	30.294	29.8087	30.2447	30.3299	30.3414	30.1092	30.2836	30.1747	30.4102	30.1871	30.1439	30.3261	30.0039	30.1549
Q922D8	C1TC_MOUSE	C-1-tetrahydrofolate synthase, cytoplasmic OS=Mus musculus GN=Mthfd1 PE=1 SV=4	Mthfd1	1.23231e+09	1.13456e+09	1.27298e+09	1.22958e+09	1.0478e+09	1.19063e+09	1.11575e+09	1.17266e+09	1.40408e+09	1.23131e+09	1.21508e+09	1.31149e+09	1.32639e+09	1.31886e+09	1.3447e+09	1.28971e+09	1.14685e+09	1.10201e+09	1.18617e+09	1.22052e+09	30.1987	30.0795	30.2456	30.1955	29.9647	30.1491	30.0554	30.1271	30.387	30.1976	30.1784	30.2886	30.3049	30.2966	30.3246	30.2644	30.095	30.0375	30.1437	30.1848
Q9D8N0	EF1G_MOUSE	Elongation factor 1-gamma OS=Mus musculus GN=Eef1g PE=1 SV=3	Eef1g	1.10288e+09	1.34141e+09	1.12867e+09	1.28461e+09	1.03073e+09	1.09601e+09	1.30048e+09	1.0327e+09	1.1643e+09	1.17382e+09	1.41185e+09	1.13261e+09	1.24281e+09	1.08958e+09	1.33407e+09	1.08038e+09	1.43703e+09	1.28335e+09	1.33235e+09	1.25627e+09	30.0386	30.3211	30.072	30.2587	29.941	30.0296	30.2764	29.9438	30.1168	30.1286	30.3949	30.077	30.211	30.0211	30.3132	30.0089	30.4204	30.2573	30.3113	30.2265
Q8BKG3	PTK7_MOUSE	Inactive tyrosine-protein kinase 7 OS=Mus musculus GN=Ptk7 PE=1 SV=1	Ptk7	1.29645e+09	7.47909e+08	1.4592e+09	1.20051e+09	1.2455e+09	1.26519e+09	1.33027e+09	1.10056e+09	1.15467e+09	9.12147e+08	1.57407e+09	1.42969e+09	1.48435e+09	1.34535e+09	1.36244e+09	9.88073e+08	1.16092e+09	8.1769e+08	1.25406e+09	1.08367e+09	30.2719	29.4783	30.4425	30.161	30.2141	30.2367	30.3091	30.0356	30.1048	29.7647	30.5519	30.4131	30.4672	30.3253	30.3435	29.88	30.1126	29.607	30.224	30.0133
Q80WC3	TNC18_MOUSE	Trinucleotide repeat-containing gene 18 protein OS=Mus musculus GN=Tnrc18 PE=1 SV=2	Tnrc18 Kiaa1856 Zfp469	9.76584e+08	1.0849e+09	1.30473e+09	1.49527e+09	1.06545e+09	1.48811e+09	1.38084e+09	6.44337e+08	1.39511e+09	1.48373e+09	1.42695e+09	1.0427e+09	1.05696e+09	1.23921e+09	1.54629e+09	1.13984e+09	9.56656e+08	1.23319e+09	1.16518e+09	9.79764e+08	29.8632	30.0149	30.2811	30.4778	29.9888	30.4708	30.3629	29.2632	30.3777	30.4666	30.4103	29.9577	29.9773	30.2068	30.5262	30.0862	29.8334	30.1997	30.1179	29.8679
Q6ZWN5	RS9_MOUSE	40S ribosomal protein S9 OS=Mus musculus GN=Rps9 PE=2 SV=3	Rps9	9.98369e+08	1.27191e+09	9.82275e+08	9.87378e+08	1.32608e+09	1.19117e+09	1.43239e+09	1.48053e+09	1.16859e+09	1.23205e+09	1.14961e+09	1.18371e+09	1.06089e+09	9.47764e+08	9.32875e+08	1.11451e+09	1.34328e+09	1.58183e+09	1.21333e+09	1.50341e+09	29.895	30.2444	29.8716	29.879	30.3045	30.1497	30.4158	30.4635	30.1221	30.1984	30.0985	30.1407	29.9826	29.82	29.7971	30.0538	30.3231	30.559	30.1763	30.4856
Q8R001	MARE2_MOUSE	Microtubule-associated protein RP/EB family member 2 OS=Mus musculus GN=Mapre2 PE=1 SV=1	Mapre2	1.2892e+09	1.235e+09	1.33004e+09	1.21625e+09	1.33109e+09	1.29485e+09	1.09734e+09	1.14609e+09	1.27407e+09	1.12621e+09	1.19319e+09	1.30244e+09	1.15535e+09	1.24637e+09	1.16869e+09	1.29874e+09	1.15847e+09	9.98831e+08	9.6509e+08	1.08362e+09	30.2638	30.2019	30.3088	30.1798	30.31	30.2701	30.0314	30.0941	30.2468	30.0688	30.1522	30.2786	30.1057	30.2151	30.1222	30.2745	30.1096	29.8957	29.8461	30.0132
P47856	GFPT1_MOUSE	Glutamine--fructose-6-phosphate aminotransferase [isomerizing] 1 OS=Mus musculus GN=Gfpt1 PE=1 SV=3	Gfpt1 Gfpt	1.14874e+09	1.18717e+09	1.20676e+09	1.25893e+09	1.1332e+09	1.13805e+09	1.07558e+09	1.02676e+09	1.33997e+09	1.24306e+09	1.25641e+09	1.28444e+09	1.25939e+09	1.28694e+09	1.25588e+09	1.17966e+09	1.14892e+09	1.11149e+09	1.12562e+09	1.22456e+09	30.0974	30.1449	30.1685	30.2296	30.0778	30.0839	30.0025	29.9355	30.3196	30.2112	30.2267	30.2585	30.2301	30.2613	30.2261	30.1357	30.0976	30.0499	30.0681	30.1896
Q01320	TOP2A_MOUSE	DNA topoisomerase 2-alpha OS=Mus musculus GN=Top2a PE=1 SV=2	Top2a Top-2 Top2	1.24605e+09	8.2359e+08	1.57389e+09	1.56606e+09	1.51054e+09	1.00474e+09	1.22424e+09	9.41024e+08	1.20067e+09	7.41357e+08	1.48244e+09	1.07258e+09	9.60922e+08	1.34325e+09	1.7705e+09	1.14167e+09	1.05013e+09	8.30448e+08	1.61588e+09	7.9007e+08	30.2147	29.6174	30.5517	30.5445	30.4924	29.9042	30.1892	29.8097	30.1612	29.4656	30.4653	29.9984	29.8398	30.3231	30.7215	30.0885	29.9679	29.6293	30.5897	29.5574
Q8R146	APEH_MOUSE	Acylamino-acid-releasing enzyme OS=Mus musculus GN=Apeh PE=2 SV=3	Apeh	1.04193e+09	1.03267e+09	1.09246e+09	9.17815e+08	1.19228e+09	1.27858e+09	9.42268e+08	1.14511e+09	1.31361e+09	1.18438e+09	8.88741e+08	1.26802e+09	1.42347e+09	1.51296e+09	1.10823e+09	1.4383e+09	1.46028e+09	1.20685e+09	1.09604e+09	1.30414e+09	29.9566	29.9437	30.0249	29.7736	30.1511	30.2519	29.8116	30.0928	30.2909	30.1415	29.7272	30.2399	30.4068	30.4947	30.0456	30.4217	30.4436	30.1686	30.0296	30.2804
Q9JHK5	PLEK_MOUSE	Pleckstrin OS=Mus musculus GN=Plek PE=1 SV=1	Plek	1.09509e+09	5.06001e+08	1.72642e+09	2.09495e+09	1.85404e+09	7.3777e+08	8.37032e+08	5.82383e+08	1.23848e+09	3.22639e+08	2.02715e+09	7.67447e+08	8.55526e+08	1.3832e+09	2.24605e+09	9.98278e+08	1.21145e+09	3.19679e+08	2.61208e+09	3.14668e+08	30.0284	28.9146	30.6851	30.9643	30.788	29.4586	29.6407	29.1174	30.2059	28.2653	30.9168	29.5155	29.6722	30.3654	31.0647	29.8949	30.1741	28.252	31.2826	28.2293
Q8CIH5	PLCG2_MOUSE	1-phosphatidylinositol 4,5-bisphosphate phosphodiesterase gamma-2 OS=Mus musculus GN=Plcg2 PE=1 SV=1	Plcg2	1.30573e+09	1.19245e+09	1.44373e+09	1.28451e+09	9.8826e+08	1.28341e+09	1.07961e+09	1.01352e+09	1.19915e+09	1.1618e+09	1.16901e+09	1.34095e+09	1.09238e+09	1.1646e+09	1.14992e+09	1.21782e+09	1.11618e+09	1.16023e+09	1.06212e+09	1.29289e+09	30.2822	30.1513	30.4272	30.2586	29.8803	30.2573	30.0079	29.9167	30.1594	30.1137	30.1226	30.3206	30.0248	30.1172	30.0989	30.1817	30.0559	30.1118	29.9843	30.268
Q76MZ3	2AAA_MOUSE	Serine/threonine-protein phosphatase 2A 65 kDa regulatory subunit A alpha isoform OS=Mus musculus GN=Ppp2r1a PE=1 SV=3	Ppp2r1a	1.17965e+09	1.24108e+09	1.11647e+09	1.2095e+09	1.23616e+09	1.20521e+09	1.35773e+09	1.33718e+09	1.19104e+09	1.12626e+09	1.1882e+09	1.11566e+09	1.15199e+09	1.1913e+09	1.2061e+09	1.18146e+09	1.15066e+09	1.11463e+09	1.06633e+09	1.1255e+09	30.1357	30.2089	30.0563	30.1718	30.2032	30.1666	30.3385	30.3165	30.1496	30.0689	30.1461	30.0553	30.1015	30.1499	30.1677	30.1379	30.0998	30.0539	29.99	30.0679
Q9CR16	PPID_MOUSE	Peptidyl-prolyl cis-trans isomerase D OS=Mus musculus GN=Ppid PE=1 SV=3	Ppid	1.16515e+09	9.1475e+08	1.22075e+09	1.00807e+09	9.74423e+08	1.07416e+09	1.32851e+09	9.18375e+08	1.14638e+09	1.01581e+09	1.21009e+09	1.26496e+09	1.17599e+09	1.30486e+09	1.58125e+09	1.30014e+09	1.20226e+09	1.2486e+09	1.38931e+09	1.18755e+09	30.1179	29.7688	30.1851	29.9089	29.86	30.0006	30.3072	29.7745	30.0944	29.92	30.1725	30.2364	30.1312	30.2812	30.5584	30.276	30.1631	30.2177	30.3717	30.1453
Q9JLJ2	AL9A1_MOUSE	4-trimethylaminobutyraldehyde dehydrogenase OS=Mus musculus GN=Aldh9a1 PE=1 SV=1	Aldh9a1	1.11818e+09	1.1799e+09	1.17792e+09	1.19734e+09	1.00777e+09	1.14437e+09	1.13322e+09	9.91182e+08	1.20645e+09	1.21218e+09	1.20608e+09	1.09382e+09	1.28964e+09	1.25595e+09	1.28035e+09	1.26548e+09	1.11176e+09	1.28544e+09	1.20719e+09	1.15108e+09	30.0585	30.136	30.1336	30.1572	29.9085	30.0919	30.0778	29.8846	30.1681	30.175	30.1677	30.0267	30.2643	30.2261	30.2539	30.237	30.0502	30.2596	30.169	30.1003
A2ARZ3	FSIP2_MOUSE	Fibrous sheath-interacting protein 2 OS=Mus musculus GN=Fsip2 PE=1 SV=3	Fsip2	1.17413e+09	1.29704e+09	1.14706e+09	1.12898e+09	1.23888e+09	1.10328e+09	6.82824e+08	1.20719e+09	1.2574e+09	1.37102e+09	1.00441e+09	1.36627e+09	9.76276e+08	1.04854e+09	7.84506e+08	1.2401e+09	1.32431e+09	1.30184e+09	1.24374e+09	1.58306e+09	30.1289	30.2726	30.0953	30.0724	30.2064	30.0391	29.3469	30.169	30.2278	30.3526	29.9037	30.3476	29.8627	29.9657	29.5472	30.2078	30.3026	30.2779	30.212	30.5601
Q9DBN5	LONP2_MOUSE	Lon protease homolog 2, peroxisomal OS=Mus musculus GN=Lonp2 PE=2 SV=1	Lonp2	1.34905e+09	1.22741e+09	1.31964e+09	1.35641e+09	1.33586e+09	1.10249e+09	8.37896e+08	1.13027e+09	1.13003e+09	1.02219e+09	1.16344e+09	1.27178e+09	1.11671e+09	1.19399e+09	9.2872e+08	1.1167e+09	1.31263e+09	1.02816e+09	1.207e+09	1.10099e+09	30.3293	30.193	30.2975	30.3371	30.3151	30.0381	29.6422	30.074	30.0737	29.929	30.1157	30.2442	30.0566	30.1531	29.7907	30.0566	30.2898	29.9374	30.1688	30.0362
O08710	THYG_MOUSE	Thyroglobulin OS=Mus musculus GN=Tg PE=1 SV=3	Tg Tgn	1.44452e+09	9.9698e+08	1.50086e+09	1.2747e+09	9.8081e+08	1.04446e+09	9.06662e+08	8.8305e+08	1.1996e+09	1.02653e+09	1.19749e+09	1.38878e+09	1.24914e+09	1.3371e+09	1.27517e+09	1.3709e+09	1.12561e+09	8.6976e+08	1.04044e+09	1.02873e+09	30.4279	29.893	30.4831	30.2475	29.8694	29.9601	29.756	29.7179	30.1599	29.9351	30.1574	30.3712	30.2183	30.3165	30.248	30.3525	30.0681	29.696	29.9545	29.9382
Q9WVA4	TAGL2_MOUSE	Transgelin-2 OS=Mus musculus GN=Tagln2 PE=1 SV=4	Tagln2 Kiaa0120	1.27924e+09	1.10048e+09	1.38223e+09	1.20845e+09	1.11138e+09	1.20715e+09	1.10005e+09	1.16989e+09	1.2499e+09	1.26407e+09	1.16287e+09	1.25809e+09	1.11711e+09	1.07238e+09	1.06196e+09	1.13606e+09	1.04735e+09	1.05678e+09	1.06517e+09	1.08445e+09	30.2526	30.0355	30.3643	30.1705	30.0497	30.169	30.0349	30.1237	30.2192	30.2354	30.115	30.2286	30.0571	29.9982	29.9841	30.0814	29.9641	29.977	29.9884	30.0143
Q61753	SERA_MOUSE	D-3-phosphoglycerate dehydrogenase OS=Mus musculus GN=Phgdh PE=1 SV=3	Phgdh	1.14712e+09	1.21142e+09	1.19556e+09	1.12177e+09	1.10278e+09	1.09149e+09	1.0575e+09	1.12525e+09	1.21555e+09	1.28171e+09	1.11096e+09	1.11662e+09	1.15431e+09	1.09011e+09	1.03165e+09	1.11549e+09	1.25104e+09	1.2656e+09	1.09629e+09	1.21168e+09	30.0954	30.174	30.155	30.0631	30.0385	30.0236	29.978	30.0676	30.179	30.2554	30.0492	30.0565	30.1044	30.0218	29.9423	30.055	30.2205	30.2372	30.03	30.1744
P12382	PFKAL_MOUSE	ATP-dependent 6-phosphofructokinase, liver type OS=Mus musculus GN=Pfkl PE=1 SV=4	Pfkl Pfk-l Pfkb	1.25602e+09	1.00334e+09	1.2944e+09	1.0535e+09	1.062e+09	1.08567e+09	9.06865e+08	1.04148e+09	1.27764e+09	1.07037e+09	1.05691e+09	1.28134e+09	1.09927e+09	1.28526e+09	1.23838e+09	1.47126e+09	1.05125e+09	1.09263e+09	1.08826e+09	1.25532e+09	30.2262	29.9022	30.2696	29.9725	29.9841	30.0159	29.7563	29.956	30.2508	29.9955	29.9772	30.255	30.0339	30.2594	30.2058	30.4544	29.9695	30.0252	30.0194	30.2254
P39054	DYN2_MOUSE	Dynamin-2 OS=Mus musculus GN=Dnm2 PE=1 SV=2	Dnm2 Dyn2	9.76389e+08	1.37977e+09	9.17028e+08	1.2125e+09	1.07762e+09	1.06588e+09	1.19646e+09	9.63546e+08	1.15026e+09	1.42948e+09	1.29446e+09	9.28335e+08	9.20246e+08	9.95202e+08	1.19324e+09	1.04525e+09	8.82369e+08	1.55688e+09	1.30474e+09	1.33786e+09	29.8629	30.3618	29.7724	30.1753	30.0052	29.9894	30.1561	29.8438	30.0993	30.4128	30.2697	29.7901	29.7774	29.8904	30.1522	29.9612	29.7168	30.536	30.2811	30.3173
P59511	ATS20_MOUSE	A disintegrin and metalloproteinase with thrombospondin motifs 20 OS=Mus musculus GN=Adamts20 PE=2 SV=2	Adamts20	1.09997e+09	1.41074e+09	1.26614e+09	1.30167e+09	1.32805e+09	1.30233e+09	6.6744e+08	1.22447e+09	9.81009e+08	1.18999e+09	1.0904e+09	1.25715e+09	9.84572e+08	1.16009e+09	7.36426e+08	1.2629e+09	1.13645e+09	1.08336e+09	1.26861e+09	1.05185e+09	30.0348	30.3938	30.2378	30.2777	30.3067	30.2785	29.3141	30.1895	29.8697	30.1483	30.0222	30.2275	29.8749	30.1116	29.456	30.2341	30.0819	30.0129	30.2406	29.9703
P02469	LAMB1_MOUSE	Laminin subunit beta-1 OS=Mus musculus GN=Lamb1 PE=1 SV=3	Lamb1 Lamb-1 Lamb1-1	9.67179e+08	1.05212e+09	9.41597e+08	9.71794e+08	9.28332e+08	9.26595e+08	1.04725e+09	9.31337e+08	1.13832e+09	1.24667e+09	1.16019e+09	1.08369e+09	1.13171e+09	1.19322e+09	1.26034e+09	1.14244e+09	1.39424e+09	1.37101e+09	1.36129e+09	1.4017e+09	29.8492	29.9706	29.8105	29.8561	29.7901	29.7874	29.964	29.7947	30.0843	30.2154	30.1117	30.0133	30.0759	30.1522	30.2312	30.0895	30.3768	30.3526	30.3423	30.3845
Q8BKX1	BAIP2_MOUSE	Brain-specific angiogenesis inhibitor 1-associated protein 2 OS=Mus musculus GN=Baiap2 PE=1 SV=2	Baiap2	8.95773e+08	1.03406e+09	7.48154e+08	1.02209e+09	1.45253e+09	1.20899e+09	1.38369e+09	1.28359e+09	1.06191e+09	1.17351e+09	1.17472e+09	1.11124e+09	1.09582e+09	9.62314e+08	1.00828e+09	8.23974e+08	1.38894e+09	1.13208e+09	1.3527e+09	1.29261e+09	29.7386	29.9457	29.4788	29.9289	30.4359	30.1712	30.3659	30.2575	29.984	30.1282	30.1297	30.0495	30.0294	29.8419	29.9093	29.618	30.3713	30.0763	30.3332	30.2676
Q8CDI6	CD158_MOUSE	Coiled-coil domain-containing protein 158 OS=Mus musculus GN=Ccdc158 PE=2 SV=1	Ccdc158	1.15581e+09	6.94306e+08	1.48794e+09	1.14518e+09	1.07999e+09	1.16561e+09	1.0616e+09	1.0908e+09	1.10166e+09	9.38003e+08	1.19757e+09	1.37012e+09	1.08606e+09	1.37752e+09	1.4051e+09	1.19281e+09	1.01844e+09	8.75432e+08	1.21996e+09	8.63151e+08	30.1063	29.371	30.4707	30.0929	30.0084	30.1184	29.9836	30.0227	30.037	29.805	30.1575	30.3517	30.0165	30.3594	30.388	30.1517	29.9237	29.7054	30.1842	29.685
Q7TMB8	CYFP1_MOUSE	Cytoplasmic FMR1-interacting protein 1 OS=Mus musculus GN=Cyfip1 PE=1 SV=1	Cyfip1 Kiaa0068 Shyc Sra1	1.09926e+09	9.7016e+08	1.06974e+09	1.15689e+09	1.11922e+09	1.12813e+09	1.19459e+09	1.12785e+09	1.15423e+09	1.05041e+09	1.17797e+09	1.16236e+09	1.13227e+09	1.17135e+09	1.17181e+09	1.09561e+09	1.14022e+09	1.02158e+09	1.12089e+09	1.1131e+09	30.0339	29.8536	29.9946	30.1076	30.0598	30.0713	30.1539	30.0709	30.1043	29.9683	30.1337	30.1144	30.0766	30.1255	30.1261	30.0291	30.0867	29.9282	30.062	30.0519
P50516	VATA_MOUSE	V-type proton ATPase catalytic subunit A OS=Mus musculus GN=Atp6v1a PE=1 SV=2	Atp6v1a Atp6a1 Atp6a2 Atp6v1a1	1.06823e+09	1.27684e+09	1.09736e+09	1.1224e+09	1.10094e+09	1.14141e+09	1.16387e+09	1.11577e+09	1.0862e+09	1.13702e+09	1.06789e+09	1.01641e+09	1.12641e+09	1.12789e+09	1.11068e+09	1.11866e+09	1.03569e+09	1.16703e+09	9.91499e+08	1.17664e+09	29.9926	30.2499	30.0314	30.0639	30.0361	30.0882	30.1163	30.0554	30.0166	30.0826	29.9921	29.9208	30.0691	30.071	30.0488	30.0591	29.9479	30.1202	29.885	30.132
P13745	GSTA1_MOUSE	Glutathione S-transferase A1 OS=Mus musculus GN=Gsta1 PE=1 SV=2	Gsta1 Gsta Gstya	1.04584e+09	1.1343e+09	1.15118e+09	1.20586e+09	1.12723e+09	1.19228e+09	1.19567e+09	1.00691e+09	1.29516e+09	1.16345e+09	1.18798e+09	1.06594e+09	1.03766e+09	9.55552e+08	1.03398e+09	1.06309e+09	1.04325e+09	1.08015e+09	9.98445e+08	1.14087e+09	29.962	30.0792	30.1005	30.1674	30.0701	30.1511	30.1552	29.9073	30.2705	30.1158	30.1459	29.9895	29.9507	29.8318	29.9456	29.9856	29.9584	30.0086	29.8951	30.0875
P10493	NID1_MOUSE	Nidogen-1 OS=Mus musculus GN=Nid1 PE=1 SV=2	Nid1 Ent	9.12582e+08	7.63595e+08	1.48686e+09	1.16606e+09	1.37056e+09	7.55043e+08	1.69668e+09	7.81219e+08	1.53385e+09	1.1868e+09	1.27518e+09	7.12864e+08	1.61806e+09	9.37439e+08	6.90599e+08	8.07046e+08	1.47769e+09	7.25769e+08	9.32694e+08	1.28755e+09	29.7654	29.5082	30.4696	30.119	30.3521	29.492	30.6601	29.5412	30.5145	30.1444	30.2481	29.4091	30.5916	29.8042	29.3633	29.5881	30.4607	29.4349	29.7968	30.262
Q80TZ3	AUXI_MOUSE	Putative tyrosine-protein phosphatase auxilin OS=Mus musculus GN=Dnajc6 PE=2 SV=2	Dnajc6 Kiaa0473	1.03013e+09	1.10287e+09	1.12531e+09	1.21474e+09	9.9701e+08	1.09502e+09	1.25439e+09	9.06465e+08	1.04783e+09	1.18812e+09	1.30247e+09	9.55341e+08	9.79561e+08	1.10457e+09	1.3662e+09	1.05314e+09	8.76215e+08	1.13998e+09	1.14477e+09	1.03537e+09	29.9402	30.0386	30.0677	30.178	29.893	30.0283	30.2243	29.7557	29.9648	30.146	30.2786	29.8314	29.8676	30.0408	30.3475	29.972	29.7067	30.0864	30.0924	29.9475
P70389	ALS_MOUSE	Insulin-like growth factor-binding protein complex acid labile subunit OS=Mus musculus GN=Igfals PE=2 SV=1	Igfals Albs Als	1.46705e+09	6.03662e+08	1.36553e+09	1.02284e+09	1.13027e+09	6.40192e+08	7.07539e+08	9.99449e+08	1.28371e+09	5.3713e+08	1.27366e+09	1.48461e+09	1.49879e+09	1.49561e+09	1.48072e+09	1.39933e+09	1.22306e+09	4.78395e+08	1.24237e+09	5.56629e+08	30.4503	29.1692	30.3468	29.9299	30.074	29.2539	29.3982	29.8966	30.2577	29.0007	30.2463	30.4674	30.4812	30.4781	30.4636	30.3821	30.1878	28.8336	30.2105	29.0521
Q9Z0G9	CLD3_MOUSE	Claudin-3 OS=Mus musculus GN=Cldn3 PE=1 SV=1	Cldn3 Cpetr2	9.49184e+08	2.02184e+09	9.01363e+08	1.51388e+09	1.29481e+09	1.21299e+09	1.10344e+09	1.86619e+09	7.06629e+08	1.31914e+09	7.30019e+08	9.94943e+08	1.04494e+09	9.49359e+08	4.66596e+08	1.00948e+09	4.96434e+08	1.52095e+09	8.30413e+08	9.24639e+08	29.8221	30.913	29.7475	30.4956	30.2701	30.1759	30.0394	30.7974	29.3964	30.297	29.4434	29.89	29.9608	29.8224	28.7976	29.911	28.887	30.5023	29.6293	29.7843
P31938	MP2K1_MOUSE	Dual specificity mitogen-activated protein kinase kinase 1 OS=Mus musculus GN=Map2k1 PE=1 SV=2	Map2k1 Mek1 Prkmk1	1.00677e+09	1.15971e+09	1.12913e+09	1.0334e+09	1.06393e+09	1.04763e+09	8.32583e+08	9.58769e+08	9.9163e+08	1.08701e+09	1.08951e+09	1.22538e+09	9.55492e+08	1.11252e+09	1.03553e+09	1.13473e+09	1.217e+09	1.30154e+09	1.22679e+09	1.21398e+09	29.9071	30.1111	30.0726	29.9447	29.9868	29.9645	29.633	29.8366	29.8852	30.0177	30.021	30.1906	29.8317	30.0512	29.9477	30.0797	30.1807	30.2776	30.1922	30.1771
Q8C196	CPSM_MOUSE	Carbamoyl-phosphate synthase [ammonia], mitochondrial OS=Mus musculus GN=Cps1 PE=1 SV=2	Cps1	9.97418e+08	1.02914e+09	1.22379e+09	1.07088e+09	8.368e+08	1.27438e+09	7.50097e+08	9.42602e+08	1.06826e+09	1.19815e+09	9.51782e+08	1.61033e+09	9.48928e+08	1.49591e+09	1.11017e+09	1.43103e+09	8.62872e+08	1.01547e+09	1.00207e+09	9.64893e+08	29.8936	29.9388	30.1887	29.9962	29.6403	30.2472	29.4825	29.8121	29.9926	30.1582	29.8261	30.5847	29.8217	30.4784	30.0481	30.4144	29.6846	29.9195	29.9003	29.8458
Q9R0G6	COMP_MOUSE	Cartilage oligomeric matrix protein OS=Mus musculus GN=Comp PE=1 SV=2	Comp	1.19105e+09	1.08498e+09	1.19688e+09	1.00595e+09	1.05421e+09	1.10924e+09	9.68237e+08	9.85618e+08	1.14052e+09	1.0151e+09	1.0505e+09	1.17457e+09	1.23188e+09	1.16843e+09	1.11661e+09	1.22957e+09	1.1091e+09	9.37637e+08	9.12915e+08	1.06583e+09	30.1496	30.015	30.1566	29.9059	29.9735	30.0469	29.8508	29.8765	30.0871	29.919	29.9684	30.1295	30.1982	30.1219	30.0565	30.1955	30.0467	29.8045	29.7659	29.9893
P21550	ENOB_MOUSE	Beta-enolase OS=Mus musculus GN=Eno3 PE=1 SV=3	Eno3 Eno-3	9.90374e+08	8.43343e+08	1.10629e+09	9.45896e+08	9.34211e+08	1.22673e+09	9.9201e+08	9.39025e+08	1.14391e+09	1.03738e+09	1.02303e+09	1.1268e+09	1.27362e+09	1.31179e+09	1.33596e+09	1.21564e+09	1.18254e+09	8.96117e+08	1.10468e+09	1.1161e+09	29.8834	29.6515	30.0431	29.8171	29.7992	30.1922	29.8858	29.8066	30.0913	29.9503	29.9302	30.0696	30.2463	30.2889	30.3152	30.1791	30.1392	29.7391	30.041	30.0558
P63242	IF5A1_MOUSE	Eukaryotic translation initiation factor 5A-1 OS=Mus musculus GN=Eif5a PE=1 SV=2	Eif5a	1.12718e+09	1.04938e+09	1.06741e+09	1.05585e+09	1.11479e+09	1.0482e+09	1.09344e+09	1.16001e+09	1.13786e+09	1.0274e+09	1.14541e+09	1.13343e+09	1.06733e+09	1.03566e+09	1.01942e+09	1.02713e+09	1.14939e+09	9.13526e+08	1.09044e+09	9.95997e+08	30.0701	29.9669	29.9915	29.9758	30.0541	29.9653	30.0262	30.1115	30.0837	29.9363	30.0932	30.078	29.9914	29.9479	29.9251	29.936	30.0982	29.7669	30.0223	29.8916
Q8C129	LCAP_MOUSE	Leucyl-cystinyl aminopeptidase OS=Mus musculus GN=Lnpep PE=1 SV=1	Lnpep	1.0995e+09	1.00787e+09	1.17691e+09	1.03954e+09	9.53592e+08	1.11132e+09	1.06112e+09	9.87961e+08	1.09061e+09	1.03799e+09	1.13474e+09	1.06202e+09	1.09625e+09	1.11547e+09	1.2287e+09	1.11031e+09	8.98602e+08	1.11508e+09	1.02173e+09	1.07106e+09	30.0342	29.9087	30.1324	29.9533	29.8288	30.0496	29.9829	29.8799	30.0225	29.9511	30.0797	29.9842	30.0299	30.055	30.1945	30.0483	29.7431	30.0545	29.9284	29.9964
A2AQ25	SKT_MOUSE	Sickle tail protein OS=Mus musculus GN=Skt PE=1 SV=1	Skt Etl4 Kiaa1217	1.20117e+09	1.13499e+09	1.07992e+09	1.15632e+09	9.9082e+08	9.41609e+08	9.22025e+08	1.39807e+09	9.06767e+08	1.14072e+09	8.79494e+08	1.05544e+09	9.97812e+08	9.97123e+08	9.00407e+08	1.07736e+09	1.08633e+09	1.15048e+09	9.95236e+08	1.28969e+09	30.1618	30.08	30.0083	30.1069	29.884	29.8106	29.7802	30.3808	29.7562	30.0873	29.7121	29.9752	29.8942	29.8932	29.746	30.0049	30.0168	30.0996	29.8905	30.2644
P05480	SRC_MOUSE	Neuronal proto-oncogene tyrosine-protein kinase Src OS=Mus musculus GN=Src PE=1 SV=4	Src	1.24415e+09	8.05519e+08	1.30455e+09	1.01867e+09	8.98616e+08	8.60749e+08	9.1181e+08	8.73019e+08	1.02143e+09	7.7354e+08	1.12006e+09	1.28665e+09	1.22389e+09	1.24998e+09	1.34632e+09	1.1618e+09	1.18099e+09	8.23915e+08	1.11346e+09	7.61242e+08	30.2125	29.5853	30.2809	29.924	29.7431	29.681	29.7642	29.7014	29.9279	29.5269	30.0609	30.261	30.1888	30.2193	30.3264	30.1137	30.1373	29.6179	30.0524	29.5038
Q9DC53	CPNE8_MOUSE	Copine-8 OS=Mus musculus GN=Cpne8 PE=2 SV=2	Cpne8	1.29432e+09	1.18523e+09	1.11844e+09	1.19633e+09	1.19076e+09	1.04364e+09	1.14065e+09	1.12135e+09	1.12152e+09	9.28865e+08	9.84518e+08	1.05709e+09	9.53902e+08	8.43814e+08	9.30193e+08	9.55926e+08	1.00719e+09	8.55577e+08	9.48388e+08	1.04439e+09	30.2696	30.1425	30.0588	30.156	30.1492	29.959	30.0872	30.0626	30.0628	29.7909	29.8748	29.9774	29.8293	29.6523	29.793	29.8323	29.9077	29.6723	29.8209	29.96
Q08509	EPS8_MOUSE	Epidermal growth factor receptor kinase substrate 8 OS=Mus musculus GN=Eps8 PE=1 SV=2	Eps8	6.84471e+08	1.18727e+09	7.87674e+08	9.4347e+08	1.34752e+09	1.33119e+09	1.31556e+09	1.35081e+09	9.48711e+08	1.29113e+09	8.47196e+08	8.20354e+08	8.11052e+08	9.43697e+08	8.54181e+08	1.01257e+09	9.30875e+08	1.30441e+09	8.59721e+08	1.24586e+09	29.3504	30.145	29.553	29.8134	30.3277	30.3101	30.293	30.3312	29.8214	30.266	29.6581	29.6117	29.5952	29.8137	29.67	29.9154	29.794	30.2807	29.6793	30.2145
O35490	BHMT1_MOUSE	Betaine--homocysteine S-methyltransferase 1 OS=Mus musculus GN=Bhmt PE=2 SV=1	Bhmt	1.0348e+09	9.56099e+08	1.12781e+09	1.01e+09	1.0264e+09	1.12644e+09	1.03955e+09	1.02482e+09	1.0297e+09	1.02617e+09	1.03873e+09	1.05378e+09	1.10898e+09	1.08059e+09	1.11956e+09	1.11934e+09	9.80118e+08	8.97445e+08	9.69313e+08	9.04788e+08	29.9467	29.8326	30.0709	29.9117	29.9349	30.0691	29.9533	29.9327	29.9396	29.9346	29.9522	29.9729	30.0466	30.0092	30.0603	30.06	29.8684	29.7412	29.8524	29.753
Q6ZWR6	SYNE1_MOUSE	Nesprin-1 OS=Mus musculus GN=Syne1 PE=1 SV=2	Syne1	1.07433e+09	8.74136e+08	1.19907e+09	1.0891e+09	1.0261e+09	1.09275e+09	9.63019e+08	9.43455e+08	1.04211e+09	9.82642e+08	1.09005e+09	1.13918e+09	1.06529e+09	1.06563e+09	1.23768e+09	9.96824e+08	1.12241e+09	8.74969e+08	9.77816e+08	8.10121e+08	30.0008	29.7033	30.1593	30.0205	29.9345	30.0253	29.843	29.8134	29.9569	29.8721	30.0218	30.0853	29.9886	29.9891	30.205	29.8928	30.0639	29.7047	29.865	29.5936
Q3UQ28	PXDN_MOUSE	Peroxidasin homolog OS=Mus musculus GN=Pxdn PE=2 SV=2	Pxdn Kiaa0230	1.04916e+09	1.05184e+09	1.22415e+09	1.10931e+09	9.44949e+08	9.97533e+08	8.57198e+08	8.88605e+08	9.69266e+08	9.92858e+08	1.16119e+09	1.09624e+09	9.34604e+08	9.30471e+08	1.02577e+09	1.06925e+09	1.08915e+09	1.11883e+09	1.10947e+09	1.02584e+09	29.9666	29.9703	30.1891	30.047	29.8157	29.8938	29.6751	29.727	29.8523	29.887	30.113	30.0299	29.7998	29.7934	29.9341	29.994	30.0206	30.0593	30.0472	29.9342
Q6URW6	MYH14_MOUSE	Myosin-14 OS=Mus musculus GN=Myh14 PE=1 SV=1	Myh14	1.13937e+09	1.19533e+09	1.20612e+09	9.849e+08	9.64148e+08	1.03766e+09	9.99344e+08	1.10613e+09	1.04839e+09	9.71868e+08	9.69644e+08	1.17468e+09	9.35642e+08	9.52962e+08	1.03626e+09	1.037e+09	9.73073e+08	1.02206e+09	7.77455e+08	1.06822e+09	30.0856	30.1548	30.1677	29.8754	29.8447	29.9507	29.8964	30.0429	29.9655	29.8562	29.8529	30.1296	29.8014	29.8278	29.9487	29.9498	29.858	29.9288	29.5342	29.9926
O70475	UGDH_MOUSE	UDP-glucose 6-dehydrogenase OS=Mus musculus GN=Ugdh PE=1 SV=1	Ugdh	1.18037e+09	9.34253e+08	1.18016e+09	1.04725e+09	9.45027e+08	9.81042e+08	8.76915e+08	9.50051e+08	1.15614e+09	9.83102e+08	1.04817e+09	1.17411e+09	1.14487e+09	1.1318e+09	1.09974e+09	1.13479e+09	9.58723e+08	8.38325e+08	9.48933e+08	8.84206e+08	30.1366	29.7992	30.1363	29.964	29.8158	29.8697	29.7079	29.8234	30.1067	29.8728	29.9652	30.1289	30.0925	30.076	30.0345	30.0798	29.8365	29.6429	29.8217	29.7198
Q91ZU9	NMD3B_MOUSE	Glutamate receptor ionotropic, NMDA 3B OS=Mus musculus GN=Grin3b PE=1 SV=1	Grin3b	8.97744e+08	1.09257e+09	9.70204e+08	1.24235e+09	9.67391e+08	1.0756e+09	1.05571e+09	8.48674e+08	7.75022e+08	8.85127e+08	1.27271e+09	9.45977e+08	1.0231e+09	9.28171e+08	1.44641e+09	9.13725e+08	1.06999e+09	8.73991e+08	1.2146e+09	1.03253e+09	29.7417	30.0251	29.8537	30.2104	29.8495	30.0025	29.9756	29.6606	29.5297	29.7213	30.2453	29.8172	29.9303	29.7898	30.4298	29.7672	29.995	29.703	30.1778	29.9435
Q61176	ARGI1_MOUSE	Arginase-1 OS=Mus musculus GN=Arg1 PE=1 SV=1	Arg1	1.27908e+09	6.89234e+08	1.11003e+09	1.03607e+09	8.3371e+08	8.76156e+08	6.47217e+08	8.25974e+08	1.18315e+09	7.99987e+08	1.00759e+09	1.29763e+09	1.47718e+09	1.32079e+09	1.05703e+09	1.21514e+09	1.34436e+09	5.5492e+08	1.01026e+09	8.19205e+08	30.2525	29.3604	30.0479	29.9485	29.635	29.7066	29.2697	29.6215	30.14	29.5754	29.9083	30.2732	30.4602	30.2987	29.9774	30.1785	30.3243	29.0477	29.9121	29.6096
P18242	CATD_MOUSE	Cathepsin D OS=Mus musculus GN=Ctsd PE=1 SV=1	Ctsd	9.34283e+08	1.12906e+09	9.36065e+08	9.53571e+08	8.60259e+08	9.1786e+08	9.84347e+08	8.21839e+08	1.01218e+09	1.06295e+09	1.02482e+09	8.395e+08	1.12737e+09	1.08775e+09	1.45552e+09	1.0349e+09	1.08654e+09	1.04126e+09	9.45294e+08	1.12138e+09	29.7993	30.0725	29.802	29.8288	29.6802	29.7737	29.8746	29.6143	29.9148	29.9854	29.9327	29.645	30.0703	30.0187	30.4389	29.9468	30.0171	29.9557	29.8162	30.0626
Q02357	ANK1_MOUSE	Ankyrin-1 OS=Mus musculus GN=Ank1 PE=1 SV=2	Ank1 Ank-1	1.55337e+09	4.73693e+08	1.63994e+09	1.26406e+09	1.15255e+09	7.85026e+08	4.92934e+08	8.77993e+08	1.01299e+09	4.98692e+08	1.09471e+09	1.60949e+09	1.24346e+09	1.23633e+09	9.20233e+08	1.29766e+09	1.22794e+09	3.69036e+08	1.28698e+09	3.28935e+08	30.5328	28.8194	30.611	30.2354	30.1022	29.5482	28.8768	29.7096	29.916	28.8936	30.0279	30.584	30.2117	30.2034	29.7774	30.2733	30.1936	28.4592	30.2613	28.2932
P30115	GSTA3_MOUSE	Glutathione S-transferase A3 OS=Mus musculus GN=Gsta3 PE=1 SV=2	Gsta3 Gstyc	1.02347e+09	1.0018e+09	1.09576e+09	1.04778e+09	8.91594e+08	1.03959e+09	1.03397e+09	9.49578e+08	1.03143e+09	9.89108e+08	1.03769e+09	1.01997e+09	1.04011e+09	1.07568e+09	1.19085e+09	1.03686e+09	7.62196e+08	1.07134e+09	9.84088e+08	1.03802e+09	29.9308	29.8999	30.0293	29.9647	29.7318	29.9534	29.9455	29.8227	29.942	29.8816	29.9507	29.9259	29.9541	30.0026	30.1493	29.9496	29.5056	29.9968	29.8742	29.9512
P43274	H14_MOUSE	Histone H1.4 OS=Mus musculus GN=Hist1h1e PE=1 SV=2	H1-4 H1f4 Hist1h1e	6.70874e+08	8.35539e+08	6.33826e+08	7.6978e+08	1.2082e+09	1.18954e+09	1.37914e+09	1.47635e+09	1.11991e+09	9.55517e+08	9.01313e+08	7.56765e+08	9.55199e+08	9.24812e+08	7.81416e+08	9.18696e+08	1.17753e+09	1.21733e+09	1.12341e+09	1.32285e+09	29.3215	29.6381	29.2395	29.5199	30.1702	30.1478	30.3611	30.4594	30.0607	29.8317	29.7475	29.4953	29.8312	29.7846	29.5415	29.775	30.1331	30.1811	30.0652	30.301
Q9JI18	LRP1B_MOUSE	Low-density lipoprotein receptor-related protein 1B OS=Mus musculus GN=Lrp1b PE=2 SV=1	Lrp1b Lrpdit	1.36692e+09	8.16287e+08	1.40109e+09	1.10556e+09	9.53731e+08	8.66103e+08	8.13431e+08	8.24671e+08	1.1e+09	7.25176e+08	1.13681e+09	1.26482e+09	1.17032e+09	1.23303e+09	1.07514e+09	1.10317e+09	9.9301e+08	7.13448e+08	9.4028e+08	6.98801e+08	30.3483	29.6045	30.3839	30.0421	29.829	29.69	29.5994	29.6192	30.0349	29.4338	30.0823	30.2363	30.1242	30.1996	30.0019	30.039	29.8872	29.4102	29.8085	29.3803
P68040	GBLP_MOUSE	Guanine nucleotide-binding protein subunit beta-2-like 1 OS=Mus musculus GN=Gnb2l1 PE=1 SV=3	Rack1 Gnb2-rs1 Gnb2l1	8.59539e+08	8.18385e+08	9.39129e+08	9.52262e+08	8.38902e+08	8.96566e+08	1.03139e+09	7.93812e+08	1.02942e+09	1.01308e+09	1.10738e+09	9.60155e+08	9.08559e+08	1.01545e+09	1.2372e+09	9.56184e+08	1.1824e+09	1.15646e+09	1.24133e+09	1.08846e+09	29.679	29.6082	29.8067	29.8268	29.6439	29.7398	29.9419	29.5642	29.9392	29.9161	30.0445	29.8387	29.759	29.9195	30.2044	29.8327	30.1391	30.1071	30.2092	30.0196
Q69Z26	CNTN4_MOUSE	Contactin-4 OS=Mus musculus GN=Cntn4 PE=2 SV=2	Cntn4 Kiaa3024	1.0846e+09	8.03575e+08	1.07317e+09	9.75399e+08	9.31847e+08	9.83949e+08	8.68124e+08	8.50592e+08	1.06976e+09	8.88687e+08	1.05345e+09	1.11655e+09	1.22299e+09	1.15355e+09	1.19471e+09	1.11299e+09	1.14644e+09	7.0553e+08	9.34386e+08	8.36699e+08	30.0145	29.5819	29.9992	29.8614	29.7955	29.874	29.6933	29.6639	29.9946	29.7271	29.9725	30.0564	30.1878	30.1034	30.154	30.0518	30.0945	29.3941	29.7994	29.6401
Q3TCH7	CUL4A_MOUSE	Cullin-4A OS=Mus musculus GN=Cul4a PE=1 SV=1	Cul4a	8.15573e+08	9.80988e+08	1.15886e+09	7.04063e+08	7.36222e+08	1.07328e+09	5.30294e+08	6.18658e+08	6.76851e+08	1.03503e+09	8.63314e+08	1.37951e+09	1.31875e+09	9.86702e+08	1.32965e+09	9.3622e+08	1.97575e+09	1.1115e+09	6.55661e+08	1.10963e+09	29.6032	29.8697	30.1101	29.3911	29.4556	29.9994	28.9822	29.2046	29.3343	29.947	29.6853	30.3615	30.2965	29.878	30.3084	29.8023	30.8798	30.0499	29.2884	30.0474
Q64449	MRC2_MOUSE	C-type mannose receptor 2 OS=Mus musculus GN=Mrc2 PE=1 SV=3	Mrc2 Kiaa0709	1.07808e+09	1.06002e+09	1.16071e+09	1.11355e+09	9.2851e+08	1.04542e+09	1.00291e+09	8.51211e+08	1.01637e+09	1.00454e+09	1.01266e+09	1.01722e+09	9.79375e+08	1.0329e+09	1.09532e+09	1.06441e+09	8.28923e+08	9.63934e+08	8.40854e+08	8.96914e+08	30.0058	29.9814	30.1124	30.0525	29.7903	29.9614	29.9015	29.6649	29.9208	29.9039	29.9155	29.922	29.8673	29.9441	30.0287	29.9874	29.6267	29.8444	29.6473	29.7404
Q61879	MYH10_MOUSE	Myosin-10 OS=Mus musculus GN=Myh10 PE=1 SV=2	Myh10	1.05037e+09	1.03635e+09	1.11473e+09	8.64693e+08	8.61918e+08	9.86758e+08	9.0942e+08	9.69293e+08	1.07259e+09	1.06793e+09	9.60432e+08	1.16082e+09	1.10614e+09	9.73565e+08	1.02129e+09	1.0192e+09	1.00026e+09	8.83124e+08	8.4843e+08	9.82858e+08	29.9683	29.9489	30.0541	29.6876	29.683	29.8781	29.7604	29.8524	29.9985	29.9922	29.8391	30.1125	30.0429	29.8587	29.9278	29.9248	29.8977	29.718	29.6602	29.8724
Q6A0A9	F120A_MOUSE	Constitutive coactivator of PPAR-gamma-like protein 1 OS=Mus musculus GN=FAM120A PE=1 SV=2	FAM120A Kiaa0183 Ossa	1.22985e+09	9.06536e+08	1.16157e+09	1.05196e+09	8.89497e+08	8.33781e+08	9.6513e+08	9.92765e+08	9.76576e+08	9.06644e+08	9.9228e+08	1.09558e+09	1.15698e+09	9.20336e+08	1.02016e+09	9.30338e+08	9.01802e+08	9.39236e+08	1.03213e+09	9.5224e+08	30.1958	29.7558	30.1134	29.9704	29.7284	29.6351	29.8461	29.8869	29.8632	29.756	29.8862	30.029	30.1077	29.7776	29.9261	29.7932	29.7482	29.8069	29.943	29.8267
Q03172	ZEP1_MOUSE	Zinc finger protein 40 OS=Mus musculus GN=Hivep1 PE=1 SV=1	Hivep1 Cryabp1 Znf40	1.26671e+09	5.08194e+08	1.1343e+09	9.24809e+08	1.08169e+09	9.25472e+08	9.60979e+08	1.15003e+09	9.93899e+08	6.11821e+08	9.06738e+08	1.27441e+09	1.11466e+09	1.07046e+09	1.17047e+09	1.15347e+09	1.0754e+09	6.84488e+08	9.7571e+08	7.22303e+08	30.2384	28.9208	30.0792	29.7846	30.0106	29.7856	29.8399	30.099	29.8885	29.1885	29.7561	30.2472	30.054	29.9956	30.1244	30.1033	30.0022	29.3505	29.8619	29.428
Q9R0K7	AT2B2_MOUSE	Plasma membrane calcium-transporting ATPase 2 OS=Mus musculus GN=Atp2b2 PE=1 SV=2	Atp2b2 Pmca2	9.34015e+08	1.01865e+09	1.07087e+09	8.5554e+08	1.20098e+09	1.24848e+09	1.28679e+09	1.26482e+09	9.8864e+08	9.3445e+08	7.78042e+08	9.09716e+08	1.04846e+09	9.4113e+08	8.73278e+08	8.97791e+08	1.00268e+09	8.08979e+08	8.58864e+08	7.20644e+08	29.7989	29.924	29.9961	29.6723	30.1616	30.2175	30.2611	30.2363	29.8809	29.7995	29.5353	29.7608	29.9656	29.8098	29.7019	29.7418	29.9012	29.5915	29.6779	29.4247
P24369	PPIB_MOUSE	Peptidyl-prolyl cis-trans isomerase B OS=Mus musculus GN=Ppib PE=2 SV=2	Ppib	9.69656e+08	1.03326e+09	1.00431e+09	1.0266e+09	8.96614e+08	9.06102e+08	8.94372e+08	8.95738e+08	9.54204e+08	9.54574e+08	1.00314e+09	9.4216e+08	9.99494e+08	1.09856e+09	1.01601e+09	1.02589e+09	9.2626e+08	9.94695e+08	1.02649e+09	1.03938e+09	29.8529	29.9446	29.9036	29.9352	29.7399	29.7551	29.7363	29.7385	29.8297	29.8303	29.9019	29.8114	29.8966	30.033	29.9203	29.9342	29.7868	29.8897	29.9351	29.9531
Q9Z0G0	GIPC1_MOUSE	PDZ domain-containing protein GIPC1 OS=Mus musculus GN=Gipc1 PE=1 SV=1	Gipc1 Gipc Rgs19ip1 Semcap1	1.10627e+09	7.56162e+08	9.36446e+08	9.79009e+08	7.75589e+08	7.92071e+08	7.43124e+08	7.53055e+08	1.12386e+09	8.147e+08	9.52463e+08	1.08122e+09	1.0954e+09	1.17489e+09	1.24625e+09	1.13141e+09	1.03142e+09	7.74856e+08	1.18608e+09	1.12184e+09	30.0431	29.4941	29.8026	29.8667	29.5307	29.5611	29.469	29.4882	30.0658	29.6017	29.8271	30.01	30.0288	30.1299	30.2149	30.0755	29.942	29.5294	30.1436	30.0632
Q3UHK8	TNR6A_MOUSE	Trinucleotide repeat-containing gene 6A protein OS=Mus musculus GN=Tnrc6a PE=1 SV=1	Tnrc6a Kiaa1460	1.02765e+09	8.69815e+08	1.35291e+09	8.92511e+08	8.28341e+08	1.14252e+09	8.54954e+08	6.76919e+08	8.87355e+08	1.01341e+09	1.1011e+09	9.11328e+08	9.19259e+08	1.09647e+09	1.31008e+09	1.07545e+09	9.57031e+08	9.15033e+08	9.82497e+08	6.88623e+08	29.9367	29.6961	30.3334	29.7333	29.6256	30.0896	29.6713	29.3344	29.7249	29.9166	30.0363	29.7634	29.7759	30.0302	30.287	30.0023	29.834	29.7692	29.8719	29.3591
Q8CG19	LTBP1_MOUSE	Latent-transforming growth factor beta-binding protein 1 OS=Mus musculus GN=Ltbp1 PE=2 SV=2	Ltbp1	1.00629e+09	1.11999e+09	1.00306e+09	9.88527e+08	9.51998e+08	1.12485e+09	9.21948e+08	1.15817e+09	9.97472e+08	1.12191e+09	9.92179e+08	9.48198e+08	8.94936e+08	8.10303e+08	1.02591e+09	9.98494e+08	9.75917e+08	8.40951e+08	7.84434e+08	8.00142e+08	29.9064	30.0608	29.9018	29.8807	29.8264	30.0671	29.7801	30.1092	29.8937	30.0633	29.886	29.8206	29.7372	29.5939	29.9343	29.8952	29.8622	29.6474	29.5471	29.5757
Q9R0Q7	TEBP_MOUSE	Prostaglandin E synthase 3 OS=Mus musculus GN=Ptges3 PE=1 SV=1	Ptges3 Sid3177 Tebp	1.02354e+09	1.06609e+09	1.00694e+09	1.11218e+09	9.54397e+08	1.00492e+09	9.77037e+08	8.69162e+08	1.00169e+09	1.0182e+09	1.0133e+09	8.82821e+08	9.21612e+08	8.47896e+08	9.44189e+08	9.53928e+08	9.86352e+08	9.21006e+08	9.48101e+08	9.71658e+08	29.9309	29.9897	29.9073	30.0507	29.83	29.9044	29.8638	29.695	29.8998	29.9234	29.9164	29.7175	29.7796	29.6593	29.8145	29.8293	29.8775	29.7786	29.8205	29.8559
Q3UHU5	MTCL1_MOUSE	Microtubule cross-linking factor 1 OS=Mus musculus GN=Mtcl1 PE=1 SV=1	Mtcl1 Ccdc165 Kiaa0802 Soga2	1.06842e+09	1.02555e+09	1.12207e+09	1.22933e+09	9.36016e+08	9.22355e+08	9.69152e+08	9.69647e+08	8.58759e+08	9.18376e+08	9.97188e+08	9.64553e+08	9.68138e+08	1.01201e+09	9.88797e+08	9.66666e+08	8.37051e+08	9.20991e+08	9.64898e+08	7.126e+08	29.9928	29.9337	30.0635	30.1952	29.802	29.7807	29.8521	29.8529	29.6777	29.7745	29.8933	29.8453	29.8506	29.9146	29.8811	29.8484	29.6407	29.7786	29.8458	29.4085
P55264	ADK_MOUSE	Adenosine kinase OS=Mus musculus GN=Adk PE=1 SV=2	Adk	8.87699e+08	1.04297e+09	9.48546e+08	9.64049e+08	8.86195e+08	9.24892e+08	9.1504e+08	7.51599e+08	9.85146e+08	9.64878e+08	9.97175e+08	9.06171e+08	1.07073e+09	9.67059e+08	1.04733e+09	9.62977e+08	1.47178e+09	8.62651e+08	8.37827e+08	9.25673e+08	29.7255	29.9581	29.8211	29.8445	29.723	29.7847	29.7693	29.4854	29.8758	29.8458	29.8933	29.7552	29.996	29.849	29.9641	29.8429	30.4549	29.6842	29.6421	29.7859
Q8CF98	COL10_MOUSE	Collectin-10 OS=Mus musculus GN=Colec10 PE=2 SV=1	Colec10 Cll1	8.87583e+08	9.72441e+08	8.63704e+08	9.56495e+08	8.2286e+08	8.90249e+08	1.03014e+09	8.6794e+08	1.05146e+09	1.02638e+09	1.01306e+09	8.95768e+08	1.02944e+09	9.73558e+08	1.0868e+09	9.70324e+08	8.80177e+08	1.01431e+09	9.03118e+08	9.70611e+08	29.7253	29.857	29.686	29.8332	29.6161	29.7296	29.9402	29.693	29.9697	29.9349	29.9161	29.7386	29.9392	29.8587	30.0174	29.8539	29.7132	29.9179	29.7503	29.8543
P47757	CAPZB_MOUSE	F-actin-capping protein subunit beta OS=Mus musculus GN=Capzb PE=1 SV=3	Capzb Cappb1	9.17067e+08	1.03772e+09	8.46377e+08	9.58305e+08	9.45251e+08	9.63805e+08	9.67776e+08	9.4291e+08	9.19143e+08	1.01986e+09	9.34713e+08	9.45622e+08	8.90414e+08	8.60974e+08	8.00112e+08	8.93977e+08	1.01562e+09	1.07131e+09	9.44684e+08	1.17816e+09	29.7725	29.9508	29.6567	29.8359	29.8161	29.8442	29.8501	29.8125	29.7757	29.9257	29.7999	29.8167	29.7299	29.6814	29.5756	29.7357	29.9197	29.9967	29.8153	30.1339
O88307	SORL_MOUSE	Sortilin-related receptor OS=Mus musculus GN=Sorl1 PE=2 SV=3	Sorl1	1.13461e+09	9.01701e+08	1.00723e+09	9.51357e+08	8.67437e+08	7.95755e+08	7.09194e+08	8.6986e+08	1.01519e+09	8.58693e+08	9.4619e+08	1.12569e+09	1.07929e+09	1.08244e+09	9.27176e+08	1.02497e+09	1.19761e+09	7.22075e+08	9.82041e+08	8.37319e+08	30.0795	29.7481	29.9077	29.8254	29.6922	29.5677	29.4016	29.6962	29.9191	29.6776	29.8176	30.0682	30.0074	30.0116	29.7883	29.9329	30.1575	29.4276	29.8712	29.6412
Q8BUK6	HOOK3_MOUSE	Protein Hook homolog 3 OS=Mus musculus GN=Hook3 PE=1 SV=2	Hook3	9.195e+08	9.4461e+08	9.15919e+08	8.74681e+08	8.6721e+08	9.47215e+08	9.0493e+08	8.23581e+08	9.81159e+08	9.98883e+08	9.20594e+08	9.4568e+08	1.06173e+09	9.80547e+08	1.01795e+09	1.01561e+09	9.39926e+08	9.75184e+08	8.81126e+08	1.09013e+09	29.7763	29.8151	29.7706	29.7042	29.6918	29.8191	29.7532	29.6173	29.8699	29.8957	29.778	29.8168	29.9838	29.869	29.923	29.9197	29.808	29.8611	29.7148	30.0219
Q60634	FLOT2_MOUSE	Flotillin-2 OS=Mus musculus GN=Flot2 PE=1 SV=2	Flot2 Esa1 M17s1	7.42911e+08	8.6955e+08	7.11633e+08	8.19973e+08	9.64967e+08	8.86481e+08	9.56781e+08	9.02826e+08	1.10001e+09	1.07323e+09	1.108e+09	1.01155e+09	1.06367e+09	8.67176e+08	9.46761e+08	8.45253e+08	1.13634e+09	9.51188e+08	9.49233e+08	1.08197e+09	29.4686	29.6957	29.4066	29.611	29.8459	29.7235	29.8336	29.7499	30.0349	29.9993	30.0453	29.9139	29.9864	29.6917	29.8184	29.6548	30.0817	29.8252	29.8222	30.011
Q04857	CO6A1_MOUSE	Collagen alpha-1(VI) chain OS=Mus musculus GN=Col6a1 PE=2 SV=1	Col6a1	9.79632e+08	9.97012e+08	9.96449e+08	9.89934e+08	1.05405e+09	9.84955e+08	9.96064e+08	8.32174e+08	1.01484e+09	8.72116e+08	8.96136e+08	8.9752e+08	9.14529e+08	9.01348e+08	9.15506e+08	1.19552e+09	9.10427e+08	8.89048e+08	7.59914e+08	8.87684e+08	29.8677	29.893	29.8922	29.8828	29.9733	29.8755	29.8917	29.6323	29.9186	29.6999	29.7391	29.7414	29.7685	29.7475	29.77	30.155	29.762	29.7277	29.5013	29.7255
P32261	ANT3_MOUSE	Antithrombin-III OS=Mus musculus GN=Serpinc1 PE=1 SV=1	Serpinc1 At3	9.50174e+08	8.87182e+08	1.01722e+09	9.64443e+08	9.31894e+08	7.52435e+08	1.03914e+09	9.37653e+08	9.58859e+08	8.08612e+08	9.08787e+08	1.00092e+09	9.0345e+08	9.77753e+08	8.88817e+08	9.43794e+08	1.0214e+09	1.01871e+09	1.06866e+09	9.00134e+08	29.8236	29.7247	29.922	29.8451	29.7956	29.487	29.9527	29.8045	29.8367	29.5909	29.7594	29.8987	29.7509	29.8649	29.7273	29.8139	29.9279	29.9241	29.9932	29.7456
P70398	USP9X_MOUSE	Probable ubiquitin carboxyl-terminal hydrolase FAF-X OS=Mus musculus GN=Usp9x PE=1 SV=2	Usp9x Fafl Fam	1.07995e+09	1.22447e+09	9.31533e+08	7.59744e+08	8.11185e+08	8.77703e+08	7.45865e+08	9.5709e+08	8.52886e+08	8.61215e+08	7.74594e+08	1.1667e+09	1.24205e+09	9.68728e+08	8.96351e+08	1.05393e+09	1.19304e+09	7.58539e+08	7.0144e+08	1.00793e+09	30.0083	30.1895	29.795	29.5009	29.5955	29.7092	29.4743	29.8341	29.6678	29.6818	29.5289	30.1198	30.2101	29.8515	29.7395	29.9731	30.152	29.4986	29.3857	29.9087
P27659	RL3_MOUSE	60S ribosomal protein L3 OS=Mus musculus GN=Rpl3 PE=2 SV=3	Rpl3	9.55021e+08	1.02753e+09	9.38728e+08	9.68643e+08	8.766e+08	1.09183e+09	8.54769e+08	9.29037e+08	9.74623e+08	1.00479e+09	9.0158e+08	1.13202e+09	1.00565e+09	7.80411e+08	7.9014e+08	9.2614e+08	1.07048e+09	8.38025e+08	7.92186e+08	1.00137e+09	29.831	29.9365	29.8061	29.8514	29.7073	30.0241	29.671	29.7912	29.8603	29.9043	29.7479	30.0763	29.9055	29.5397	29.5575	29.7867	29.9956	29.6424	29.5613	29.8993
P82198	BGH3_MOUSE	Transforming growth factor-beta-induced protein ig-h3 OS=Mus musculus GN=Tgfbi PE=2 SV=1	Tgfbi	9.70425e+08	1.14959e+09	9.26002e+08	1.00557e+09	1.01164e+09	8.40483e+08	9.07494e+08	1.05864e+09	9.17518e+08	1.10819e+09	7.81876e+08	1.06835e+09	8.44592e+08	9.02202e+08	7.40891e+08	1.24132e+09	7.98581e+08	9.35184e+08	7.5599e+08	8.08113e+08	29.854	30.0985	29.7864	29.9054	29.9141	29.6466	29.7573	29.9796	29.7732	30.0456	29.5424	29.9927	29.6537	29.7489	29.4647	30.2092	29.5729	29.8007	29.4938	29.59
P63330	PP2AA_MOUSE	Serine/threonine-protein phosphatase 2A catalytic subunit alpha isoform OS=Mus musculus GN=Ppp2ca PE=1 SV=1	Ppp2ca	1.11537e+09	8.75357e+08	1.05115e+09	9.8843e+08	8.11334e+08	8.81464e+08	7.02637e+08	7.94523e+08	1.05349e+09	9.1047e+08	9.95061e+08	1.0397e+09	1.07784e+09	1.03591e+09	1.02405e+09	1.00313e+09	1.0105e+09	6.46165e+08	8.79108e+08	8.71527e+08	30.0549	29.7053	29.9693	29.8806	29.5957	29.7153	29.3882	29.5655	29.9725	29.762	29.8902	29.9535	30.0055	29.9482	29.9316	29.9019	29.9124	29.2673	29.7115	29.699
Q9ES46	PARVB_MOUSE	Beta-parvin OS=Mus musculus GN=Parvb PE=1 SV=1	Parvb	8.90462e+08	8.47894e+08	1.04748e+09	1.04611e+09	1.05188e+09	8.98484e+08	8.21171e+08	1.07723e+09	1.31816e+09	9.10909e+08	9.83945e+08	8.69354e+08	8.57522e+08	7.47531e+08	9.65527e+08	9.20892e+08	1.09601e+09	6.9062e+08	9.01405e+08	7.91272e+08	29.73	29.6593	29.9643	29.9624	29.9703	29.7429	29.6131	30.0047	30.2959	29.7627	29.874	29.6954	29.6756	29.4776	29.8467	29.7785	30.0296	29.3633	29.7476	29.5596
P49182	HEP2_MOUSE	Heparin cofactor 2 OS=Mus musculus GN=Serpind1 PE=1 SV=1	Serpind1 Hcf2 Hcii	8.20776e+08	9.35675e+08	8.81123e+08	9.14682e+08	8.84922e+08	9.50855e+08	9.7571e+08	8.0854e+08	9.57587e+08	1.02285e+09	1.02345e+09	9.07753e+08	9.29765e+08	9.46852e+08	1.05035e+09	9.60741e+08	9.12692e+08	9.61e+08	8.76862e+08	9.73414e+08	29.6124	29.8014	29.7148	29.7687	29.721	29.8246	29.8619	29.5907	29.8348	29.93	29.9308	29.7577	29.7923	29.8186	29.9682	29.8396	29.7656	29.84	29.7078	29.8585
Q6PDS3	SARM1_MOUSE	Sterile alpha and TIR motif-containing protein 1 OS=Mus musculus GN=Sarm1 PE=1 SV=1	Sarm1 Kiaa0524	1.05743e+09	6.11511e+08	1.04448e+09	9.926e+08	8.54348e+08	9.74973e+08	5.33737e+08	1.11025e+09	9.15237e+08	9.82296e+08	8.55968e+08	1.17418e+09	7.9965e+08	9.84504e+08	9.14898e+08	1.12572e+09	9.42022e+08	6.43542e+08	1.02155e+09	1.06787e+09	29.9779	29.1878	29.9601	29.8866	29.6702	29.8608	28.9916	30.0482	29.7696	29.8716	29.673	30.129	29.5748	29.8748	29.769	30.0682	29.8112	29.2615	29.9281	29.9921
P32067	LA_MOUSE	Lupus La protein homolog OS=Mus musculus GN=Ssb PE=2 SV=1	Ssb Ss-b	8.00163e+08	1.05982e+09	8.10652e+08	1.00817e+09	9.49818e+08	6.33968e+08	5.65695e+08	8.21303e+08	9.31209e+08	9.36131e+08	9.008e+08	1.09595e+09	6.82867e+08	9.26945e+08	5.70942e+08	9.34455e+08	1.1505e+09	1.25801e+09	1.32054e+09	1.22274e+09	29.5757	29.9812	29.5945	29.9091	29.8231	29.2398	29.0755	29.6133	29.7945	29.8021	29.7466	30.0295	29.347	29.7879	29.0888	29.7996	30.0996	30.2285	30.2985	30.1875
Q9R098	HGFA_MOUSE	Hepatocyte growth factor activator OS=Mus musculus GN=Hgfac PE=1 SV=1	Hgfac	1.11021e+09	8.24192e+08	1.19327e+09	9.20025e+08	9.7819e+08	6.74363e+08	6.33686e+08	7.96533e+08	8.89553e+08	6.87142e+08	1.00335e+09	1.17697e+09	8.86785e+08	1.14864e+09	9.25333e+08	1.02967e+09	9.44411e+08	9.0533e+08	9.7763e+08	7.94637e+08	30.0482	29.6184	30.1523	29.7771	29.8655	29.329	29.2392	29.5692	29.7285	29.356	29.9022	30.1324	29.724	30.0973	29.7854	29.9395	29.8148	29.7539	29.8647	29.5657
Q8BWP8	B4GA1_MOUSE	Beta-1,4-glucuronyltransferase 1 OS=Mus musculus GN=B4gat1 PE=1 SV=1	B4gat1 B3gnt1 B3gnt6	9.07263e+08	9.8756e+08	9.69709e+08	9.5683e+08	8.63216e+08	9.5958e+08	9.93683e+08	7.66862e+08	9.02043e+08	1.0153e+09	1.03766e+09	8.75684e+08	9.06742e+08	8.3898e+08	9.97616e+08	9.01395e+08	8.72874e+08	1.01011e+09	7.85206e+08	8.9288e+08	29.7569	29.8793	29.853	29.8337	29.6851	29.8378	29.8882	29.5144	29.7486	29.9193	29.9507	29.7058	29.7561	29.6441	29.8939	29.7476	29.7012	29.9119	29.5485	29.7339
Q6ZQA0	NBEL2_MOUSE	Neurobeachin-like protein 2 OS=Mus musculus GN=Nbeal2 PE=2 SV=2	Nbeal2 Kiaa0540	8.40889e+08	9.78839e+08	9.39036e+08	9.57755e+08	1.22138e+09	1.04887e+09	1.18996e+09	1.05394e+09	9.4391e+08	9.53817e+08	8.39925e+08	7.8796e+08	7.98539e+08	8.60358e+08	8.19317e+08	9.20701e+08	8.31659e+08	8.44825e+08	7.4881e+08	8.49811e+08	29.6473	29.8665	29.8066	29.8351	30.1859	29.9662	30.1483	29.9731	29.8141	29.8291	29.6457	29.5535	29.5728	29.6804	29.6098	29.7782	29.6314	29.6541	29.48	29.6626
Q9CWJ9	PUR9_MOUSE	Bifunctional purine biosynthesis protein PURH OS=Mus musculus GN=Atic PE=1 SV=2	Atic Purh	8.66215e+08	9.23379e+08	8.58623e+08	8.75291e+08	8.10973e+08	9.01463e+08	8.52908e+08	8.43499e+08	9.4058e+08	9.3429e+08	9.22577e+08	8.75614e+08	1.03713e+09	1.03498e+09	1.00134e+09	9.76976e+08	9.13393e+08	9.14743e+08	8.88009e+08	9.08644e+08	29.6902	29.7823	29.6774	29.7052	29.5951	29.7477	29.6678	29.6518	29.809	29.7993	29.7811	29.7057	29.95	29.947	29.8993	29.8637	29.7667	29.7688	29.726	29.7591
Q62417	SRBS1_MOUSE	Sorbin and SH3 domain-containing protein 1 OS=Mus musculus GN=Sorbs1 PE=1 SV=2	Sorbs1 Kiaa1296 Sh3d5	9.34744e+08	8.82603e+08	1.00399e+09	1.01413e+09	1.07228e+09	1.04661e+09	9.85556e+08	9.85044e+08	8.52424e+08	8.93884e+08	8.51669e+08	7.87219e+08	8.83024e+08	9.27465e+08	9.26765e+08	9.06309e+08	8.29253e+08	6.75856e+08	8.70571e+08	8.71295e+08	29.8	29.7172	29.9031	29.9176	29.998	29.9631	29.8764	29.8756	29.667	29.7355	29.6657	29.5522	29.7179	29.7887	29.7876	29.7554	29.6272	29.3321	29.6974	29.6986
Q62469	ITA2_MOUSE	Integrin alpha-2 OS=Mus musculus GN=Itga2 PE=1 SV=2	Itga2	9.97671e+08	7.2031e+08	9.61236e+08	9.80772e+08	8.69699e+08	8.11765e+08	8.35382e+08	8.21534e+08	9.34455e+08	7.96405e+08	1.00819e+09	1.00018e+09	9.43162e+08	9.90298e+08	1.05648e+09	9.19851e+08	8.94996e+08	7.74513e+08	1.02781e+09	8.15321e+08	29.894	29.424	29.8403	29.8693	29.6959	29.5965	29.6379	29.6137	29.7995	29.5689	29.9091	29.8976	29.8129	29.8833	29.9766	29.7768	29.7373	29.5287	29.9369	29.6028
Q99KN1	ARRD1_MOUSE	Arrestin domain-containing protein 1 OS=Mus musculus GN=Arrdc1 PE=2 SV=2	Arrdc1	5.25683e+08	6.35352e+08	4.49043e+08	5.59956e+08	1.22371e+09	1.01095e+09	1.21903e+09	1.25394e+09	1.00367e+09	1.14854e+09	9.81846e+08	8.4721e+08	1.06481e+09	8.13664e+08	8.39672e+08	7.68539e+08	8.29683e+08	9.26438e+08	1.11779e+09	9.18261e+08	28.9696	29.243	28.7423	29.0607	30.1886	29.9131	30.1831	30.2238	29.9026	30.0972	29.8709	29.6581	29.988	29.5999	29.6453	29.5175	29.628	29.7871	30.058	29.7743
Q64442	DHSO_MOUSE	Sorbitol dehydrogenase OS=Mus musculus GN=Sord PE=1 SV=3	Sord Sdh1	1.04274e+09	6.52234e+08	1.08378e+09	1.02631e+09	8.33366e+08	8.21782e+08	6.78269e+08	7.39864e+08	1.03947e+09	7.63959e+08	9.49929e+08	1.04536e+09	9.99962e+08	1.08362e+09	1.07687e+09	1.07557e+09	1.00737e+09	5.53171e+08	9.13473e+08	7.11595e+08	29.9577	29.2808	30.0134	29.9348	29.6344	29.6142	29.3373	29.4627	29.9532	29.5089	29.8232	29.9614	29.8973	30.0132	30.0042	30.0025	29.9079	29.0432	29.7668	29.4065
Q9EPL8	IPO7_MOUSE	Importin-7 OS=Mus musculus GN=Ipo7 PE=1 SV=2	Ipo7 Ranbp7	9.70578e+08	1.06069e+09	8.34095e+08	1.11272e+09	7.68385e+08	7.34409e+08	9.01013e+08	8.71253e+08	6.87943e+08	8.12492e+08	1.04203e+09	8.89242e+08	6.92332e+08	9.58538e+08	1.11026e+09	9.44749e+08	8.87418e+08	1.02001e+09	1.01466e+09	7.84097e+08	29.8543	29.9824	29.6356	30.0514	29.5173	29.452	29.747	29.6985	29.3577	29.5978	29.9568	29.728	29.3669	29.8363	30.0483	29.8154	29.725	29.9259	29.9183	29.5465
Q6P5F9	XPO1_MOUSE	Exportin-1 OS=Mus musculus GN=Xpo1 PE=1 SV=1	Xpo1 Crm1	1.01249e+09	5.66106e+08	1.08521e+09	9.58032e+08	8.06323e+08	9.67873e+08	8.50023e+08	9.02355e+08	9.40681e+08	8.32291e+08	8.81867e+08	1.03039e+09	9.15757e+08	9.99329e+08	9.91539e+08	1.0295e+09	8.58907e+08	6.36318e+08	9.53153e+08	8.75209e+08	29.9153	29.0765	30.0153	29.8355	29.5868	29.8502	29.6629	29.7491	29.8091	29.6325	29.716	29.9405	29.7704	29.8964	29.8851	29.9393	29.6779	29.2452	29.8281	29.7051
Q6RHW0	K1C9_MOUSE	Keratin, type I cytoskeletal 9 OS=Mus musculus GN=Krt9 PE=1 SV=2	Krt9 K9 Krt1-9	1.1184e+09	8.82883e+08	7.35188e+08	1.13136e+09	8.31648e+08	1.07521e+09	1.05552e+09	8.38011e+08	9.00088e+08	9.03214e+08	7.98407e+08	8.70733e+08	8.23685e+08	9.93092e+08	8.98209e+08	8.34078e+08	7.26028e+08	8.70844e+08	8.1128e+08	9.1886e+08	30.0588	29.7176	29.4535	30.0754	29.6314	30.002	29.9753	29.6424	29.7455	29.7505	29.5725	29.6977	29.6175	29.8874	29.7425	29.6356	29.4355	29.6978	29.5956	29.7753
P09528	FRIH_MOUSE	Ferritin heavy chain OS=Mus musculus GN=Fth1 PE=1 SV=2	Fth1 Fth	8.55467e+08	9.0641e+08	9.78891e+08	9.58486e+08	7.59715e+08	7.43792e+08	7.63731e+08	7.46007e+08	9.59828e+08	9.6204e+08	1.06174e+09	8.35483e+08	9.35552e+08	9.19748e+08	7.9495e+08	8.98671e+08	9.00089e+08	8.6613e+08	9.45406e+08	1.00755e+09	29.6721	29.7556	29.8666	29.8362	29.5009	29.4703	29.5085	29.4746	29.8382	29.8415	29.9838	29.638	29.8012	29.7767	29.5663	29.7432	29.7455	29.69	29.8164	29.9082
O08553	DPYL2_MOUSE	Dihydropyrimidinase-related protein 2 OS=Mus musculus GN=Dpysl2 PE=1 SV=2	Dpysl2 Crmp2 Ulip2	1.00458e+09	7.46638e+08	1.07683e+09	9.08833e+08	8.20152e+08	9.34419e+08	7.06626e+08	7.83139e+08	9.14692e+08	8.59168e+08	8.90024e+08	1.02715e+09	9.75294e+08	1.04191e+09	8.94275e+08	1.01212e+09	8.96765e+08	7.4718e+08	7.55143e+08	7.81495e+08	29.9039	29.4758	30.0041	29.7594	29.6113	29.7995	29.3964	29.5447	29.7687	29.6784	29.7293	29.936	29.8613	29.9566	29.7361	29.9147	29.7402	29.4769	29.4922	29.5417
Q61166	MARE1_MOUSE	Microtubule-associated protein RP/EB family member 1 OS=Mus musculus GN=Mapre1 PE=1 SV=3	Mapre1	1.0214e+09	7.46e+08	1.13155e+09	9.95846e+08	8.58631e+08	8.6143e+08	7.37406e+08	7.58957e+08	8.61114e+08	5.78339e+08	9.03053e+08	1.08326e+09	9.15035e+08	1.05853e+09	1.19582e+09	1.02746e+09	9.43593e+08	5.82619e+08	9.19774e+08	5.43065e+08	29.9279	29.4746	30.0757	29.8913	29.6775	29.6822	29.4579	29.4994	29.6816	29.1073	29.7502	30.0127	29.7693	29.9794	30.1554	29.9364	29.8136	29.118	29.7767	29.0165
P24383	WNT7A_MOUSE	Protein Wnt-7a OS=Mus musculus GN=Wnt7a PE=1 SV=2	Wnt7a Wnt-7a	8.37411e+08	6.29652e+08	1.65298e+09	1.37391e+09	6.93047e+08	9.67764e+08	7.06494e+08	6.57042e+08	6.24642e+08	7.30793e+08	8.92076e+08	9.52804e+08	5.15355e+08	1.40011e+09	7.54349e+08	8.0669e+08	5.68769e+08	1.06742e+09	1.0001e+09	7.57709e+08	29.6414	29.23	30.6224	30.3556	29.3684	29.8501	29.3961	29.2914	29.2185	29.4449	29.7326	29.8276	28.941	30.3829	29.4907	29.5874	29.0833	29.9915	29.8975	29.4971
P14211	CALR_MOUSE	Calreticulin OS=Mus musculus GN=Calr PE=1 SV=1	Calr	8.48609e+08	9.49762e+08	9.34916e+08	9.99022e+08	7.53466e+08	8.92757e+08	9.81878e+08	7.30853e+08	8.38089e+08	8.43235e+08	9.23534e+08	8.49769e+08	8.72159e+08	9.25661e+08	8.85347e+08	8.57097e+08	7.86857e+08	9.84405e+08	8.73846e+08	8.48778e+08	29.6605	29.823	29.8003	29.8959	29.489	29.7337	29.871	29.445	29.6425	29.6514	29.7826	29.6625	29.7	29.7859	29.7217	29.6749	29.5515	29.8747	29.7028	29.6608
Q9WVE8	PACN2_MOUSE	Protein kinase C and casein kinase substrate in neurons protein 2 OS=Mus musculus GN=Pacsin2 PE=1 SV=1	Pacsin2	8.12931e+08	1.02962e+09	7.29396e+08	7.53654e+08	1.07927e+09	8.91254e+08	1.02369e+09	1.13508e+09	8.52418e+08	8.98519e+08	8.5207e+08	8.74879e+08	8.12915e+08	6.9473e+08	6.77439e+08	7.12083e+08	9.71478e+08	8.64198e+08	8.94457e+08	9.30493e+08	29.5986	29.9395	29.4421	29.4893	30.0074	29.7313	29.9311	30.0801	29.667	29.743	29.6664	29.7045	29.5985	29.3719	29.3355	29.4075	29.8556	29.6868	29.7364	29.7934
O08688	CAN5_MOUSE	Calpain-5 OS=Mus musculus GN=Capn5 PE=2 SV=1	Capn5 Ncl3	8.29258e+08	8.96928e+08	7.63573e+08	7.94193e+08	1.03963e+09	9.65025e+08	1.02165e+09	9.91176e+08	8.70892e+08	8.85806e+08	8.64009e+08	8.42548e+08	8.31614e+08	7.82841e+08	8.84672e+08	7.15405e+08	8.42372e+08	8.69365e+08	8.46028e+08	8.8839e+08	29.6272	29.7404	29.5082	29.5649	29.9534	29.846	29.9283	29.8846	29.6979	29.7224	29.6865	29.6502	29.6313	29.5441	29.7206	29.4142	29.6499	29.6954	29.6561	29.7266
Q9R158	AD26A_MOUSE	Disintegrin and metalloproteinase domain-containing protein 26A OS=Mus musculus GN=Adam26a PE=2 SV=2	Adam26a Adam26	8.46115e+08	7.13486e+08	9.01659e+08	8.62427e+08	7.50166e+08	9.12599e+08	7.8221e+08	7.25699e+08	8.99797e+08	9.156e+08	9.40918e+08	8.54681e+08	8.52825e+08	9.36291e+08	1.08908e+09	9.13539e+08	7.77854e+08	9.03816e+08	8.49584e+08	8.52911e+08	29.6563	29.4103	29.748	29.6838	29.4826	29.7654	29.543	29.4348	29.745	29.7701	29.8095	29.6708	29.6677	29.8024	30.0205	29.7669	29.5349	29.7515	29.6622	29.6678
Q2PZL6	FAT4_MOUSE	Protocadherin Fat 4 OS=Mus musculus GN=Fat4 PE=1 SV=2	Fat4 Fatj	1.08847e+09	7.2715e+08	1.09957e+09	9.2857e+08	9.56075e+08	8.4424e+08	6.40579e+08	8.67111e+08	8.56243e+08	6.97012e+08	8.3734e+08	1.07873e+09	8.31358e+08	8.85996e+08	8.89447e+08	1.06897e+09	8.35423e+08	6.4466e+08	8.18614e+08	6.57536e+08	30.0196	29.4377	30.0343	29.7904	29.8325	29.6531	29.2548	29.6916	29.6734	29.3766	29.6412	30.0067	29.6309	29.7227	29.7283	29.9936	29.6379	29.264	29.6086	29.2925
Q91ZB0	ALPK2_MOUSE	Alpha-protein kinase 2 OS=Mus musculus GN=Alpk2 PE=2 SV=3	Alpk2 Hak	1.09311e+09	8.67907e+08	1.08494e+09	8.47715e+08	7.72733e+08	8.27473e+08	6.4479e+08	7.67861e+08	8.95051e+08	8.03454e+08	7.04346e+08	1.06475e+09	9.11418e+08	1.01215e+09	7.7558e+08	9.73563e+08	9.40038e+08	6.45716e+08	7.62185e+08	8.36274e+08	30.0258	29.693	30.015	29.659	29.5254	29.6241	29.2643	29.5163	29.7374	29.5816	29.3917	29.9879	29.7635	29.9148	29.5307	29.8587	29.8081	29.2663	29.5056	29.6394
P42932	TCPQ_MOUSE	T-complex protein 1 subunit theta OS=Mus musculus GN=Cct8 PE=1 SV=3	Cct8 Cctq	7.86583e+08	7.74125e+08	7.82436e+08	7.74583e+08	6.60783e+08	7.48522e+08	7.22485e+08	7.74693e+08	9.0193e+08	9.72126e+08	8.88881e+08	8.84331e+08	8.20153e+08	8.3433e+08	8.73797e+08	8.65272e+08	1.00833e+09	1.04886e+09	1.02212e+09	1.06892e+09	29.551	29.528	29.5434	29.5288	29.2996	29.4795	29.4284	29.529	29.7484	29.8566	29.7274	29.72	29.6113	29.636	29.7027	29.6886	29.9093	29.9662	29.9289	29.9935
Q91VW5	GOGA4_MOUSE	Golgin subfamily A member 4 OS=Mus musculus GN=Golga4 PE=1 SV=2	Golga4	6.02013e+08	7.56535e+08	5.07614e+08	6.4469e+08	1.44584e+09	1.13959e+09	1.28865e+09	1.25478e+09	8.65811e+08	9.57374e+08	8.74552e+08	7.64894e+08	5.4142e+08	5.42041e+08	5.6359e+08	5.09235e+08	8.44584e+08	9.51065e+08	1.02146e+09	9.29594e+08	29.1652	29.4948	28.9192	29.264	30.4293	30.0859	30.2632	30.2248	29.6895	29.8345	29.704	29.5107	29.0122	29.0138	29.0701	28.9238	29.6537	29.825	29.928	29.792
P98063	BMP1_MOUSE	Bone morphogenetic protein 1 OS=Mus musculus GN=Bmp1 PE=1 SV=2	Bmp1	1.0329e+09	8.84435e+08	1.08966e+09	9.73004e+08	6.13868e+08	6.85896e+08	6.76844e+08	6.10586e+08	9.05617e+08	9.15915e+08	9.29315e+08	1.00618e+09	8.9374e+08	9.02022e+08	9.70803e+08	9.07798e+08	7.55108e+08	6.94957e+08	7.07878e+08	7.32933e+08	29.944	29.7202	30.0212	29.8579	29.1934	29.3534	29.3342	29.1856	29.7543	29.7706	29.7916	29.9062	29.7353	29.7486	29.8546	29.7578	29.4921	29.3723	29.3989	29.4491
Q9EQK5	MVP_MOUSE	Major vault protein OS=Mus musculus GN=Mvp PE=1 SV=4	Mvp	7.61233e+08	1.20838e+09	6.57313e+08	7.4332e+08	5.6249e+08	5.5789e+08	5.81602e+08	7.63705e+08	7.39354e+08	8.31066e+08	7.4554e+08	7.73537e+08	7.49229e+08	7.67819e+08	6.35827e+08	1.34479e+09	9.20997e+08	1.47862e+09	9.82191e+08	1.02955e+09	29.5038	30.1704	29.292	29.4694	29.0673	29.0554	29.1155	29.5084	29.4617	29.6304	29.4737	29.5269	29.4808	29.5162	29.2441	30.3247	29.7786	30.4616	29.8714	29.9394
Q80VA0	GALT7_MOUSE	N-acetylgalactosaminyltransferase 7 OS=Mus musculus GN=Galnt7 PE=2 SV=2	Galnt7	9.85275e+08	5.95464e+08	1.01176e+09	7.1904e+08	7.26934e+08	8.75963e+08	6.77746e+08	6.69408e+08	9.06819e+08	7.3121e+08	8.51648e+08	1.0708e+09	9.23695e+08	9.87256e+08	1.01082e+09	9.91694e+08	1.01853e+09	5.29257e+08	7.22394e+08	8.03643e+08	29.876	29.1494	29.9142	29.4215	29.4372	29.7063	29.3362	29.3183	29.7562	29.4457	29.6657	29.996	29.7828	29.8788	29.9129	29.8853	29.9238	28.9794	29.4282	29.582
Q6ZQ38	CAND1_MOUSE	Cullin-associated NEDD8-dissociated protein 1 OS=Mus musculus GN=Cand1 PE=2 SV=2	Cand1 D10Ertd516e Kiaa0829	8.82794e+08	5.3564e+08	1.10269e+09	1.06887e+09	9.23464e+08	6.51972e+08	6.83549e+08	6.31113e+08	8.49664e+08	5.65027e+08	1.05188e+09	7.67516e+08	8.31147e+08	9.28642e+08	1.21767e+09	7.90252e+08	9.26696e+08	5.34468e+08	1.22215e+09	5.97501e+08	29.7175	28.9967	30.0384	29.9934	29.7825	29.2802	29.3485	29.2333	29.6623	29.0737	29.9703	29.5156	29.6305	29.7905	30.1815	29.5577	29.7875	28.9935	30.1868	29.1544
Q99K51	PLST_MOUSE	Plastin-3 OS=Mus musculus GN=Pls3 PE=1 SV=3	Pls3	9.51258e+08	7.5301e+08	1.025e+09	8.08232e+08	8.12325e+08	8.62473e+08	7.33374e+08	8.17341e+08	9.22314e+08	8.0945e+08	8.81271e+08	9.44508e+08	9.31425e+08	8.45401e+08	8.25758e+08	8.38823e+08	8.62486e+08	6.90242e+08	7.43751e+08	6.98599e+08	29.8253	29.4881	29.933	29.5902	29.5975	29.6839	29.45	29.6064	29.7807	29.5924	29.715	29.815	29.7949	29.6551	29.6211	29.6438	29.6839	29.3625	29.4702	29.3799
Q99KK7	DPP3_MOUSE	Dipeptidyl peptidase 3 OS=Mus musculus GN=Dpp3 PE=2 SV=2	Dpp3	8.68703e+08	7.70709e+08	8.9394e+08	8.46165e+08	7.76979e+08	8.20573e+08	8.08917e+08	7.01307e+08	8.76854e+08	8.00534e+08	8.91338e+08	8.39776e+08	9.21102e+08	9.21531e+08	1.03343e+09	8.65345e+08	7.9937e+08	6.82727e+08	7.76371e+08	7.50226e+08	29.6943	29.5216	29.7356	29.6564	29.5333	29.6121	29.5914	29.3855	29.7078	29.5764	29.7314	29.6454	29.7788	29.7795	29.9448	29.6887	29.5743	29.3467	29.5322	29.4828
Q61554	FBN1_MOUSE	Fibrillin-1 OS=Mus musculus GN=Fbn1 PE=1 SV=1	Fbn1 Fbn-1	7.87544e+08	1.32634e+09	8.15969e+08	6.85573e+08	6.49893e+08	1.08091e+09	6.1468e+08	8.26488e+08	6.09225e+08	9.15084e+08	4.71895e+08	1.04162e+09	7.11988e+08	8.41294e+08	6.59517e+08	1.76358e+09	6.55772e+08	8.0084e+08	5.64527e+08	8.18528e+08	29.5528	30.3048	29.6039	29.3527	29.2756	30.0096	29.1953	29.6224	29.1824	29.7693	28.8139	29.9562	29.4073	29.648	29.2968	30.7159	29.2886	29.5769	29.0725	29.6085
P07742	RIR1_MOUSE	Ribonucleoside-diphosphate reductase large subunit OS=Mus musculus GN=Rrm1 PE=1 SV=2	Rrm1	8.79928e+08	8.6456e+08	9.21593e+08	9.13896e+08	7.61933e+08	8.4883e+08	8.00431e+08	7.48236e+08	8.68398e+08	8.12713e+08	8.71372e+08	8.46806e+08	8.82622e+08	8.41442e+08	8.72976e+08	8.52761e+08	7.58042e+08	7.21019e+08	6.98261e+08	7.7718e+08	29.7128	29.6874	29.7796	29.7675	29.5051	29.6609	29.5762	29.4789	29.6938	29.5982	29.6987	29.6575	29.7172	29.6483	29.7014	29.6676	29.4977	29.4255	29.3792	29.5337
P08113	ENPL_MOUSE	Endoplasmin OS=Mus musculus GN=Hsp90b1 PE=1 SV=2	Hsp90b1 Grp94 Tra-1 Tra1	8.1559e+08	8.58851e+08	8.88412e+08	8.40108e+08	7.67701e+08	8.55867e+08	8.36306e+08	7.49851e+08	7.91448e+08	8.40286e+08	7.95208e+08	8.06246e+08	7.8686e+08	8.31539e+08	8.92179e+08	7.9353e+08	7.95376e+08	8.87178e+08	7.76532e+08	8.65493e+08	29.6033	29.6778	29.7267	29.646	29.516	29.6728	29.6395	29.482	29.5599	29.6463	29.5668	29.5866	29.5515	29.6312	29.7328	29.5637	29.5671	29.7246	29.5325	29.6889
Q8CH72	TRI32_MOUSE	E3 ubiquitin-protein ligase TRIM32 OS=Mus musculus GN=Trim32 PE=1 SV=2	Trim32	7.92988e+08	8.19741e+08	8.17584e+08	7.62818e+08	7.49355e+08	8.09218e+08	7.69247e+08	6.97479e+08	8.74362e+08	8.68357e+08	8.11715e+08	8.2702e+08	8.56524e+08	9.39822e+08	9.30701e+08	9.06646e+08	7.67316e+08	8.03646e+08	7.64336e+08	8.60321e+08	29.5627	29.6106	29.6068	29.5068	29.4811	29.592	29.5189	29.3776	29.7037	29.6937	29.5964	29.6233	29.6739	29.8078	29.7937	29.756	29.5152	29.582	29.5096	29.6803
Q5SZV5	K0319_MOUSE	Dyslexia-associated protein KIAA0319 homolog OS=Mus musculus GN=Kiaa0319 PE=2 SV=1	Kiaa0319	8.00435e+08	8.35283e+08	7.95445e+08	8.01066e+08	7.64779e+08	7.37305e+08	7.44404e+08	8.42909e+08	8.71212e+08	9.59245e+08	7.89432e+08	8.71234e+08	7.88944e+08	6.52145e+08	6.32296e+08	6.99319e+08	8.02557e+08	1.15511e+09	8.3373e+08	9.65061e+08	29.5762	29.6377	29.5672	29.5773	29.5105	29.4577	29.4715	29.6508	29.6984	29.8373	29.5562	29.6985	29.5553	29.2806	29.236	29.3814	29.58	30.1054	29.635	29.846
P21271	MYO5B_MOUSE	Unconventional myosin-Vb OS=Mus musculus GN=Myo5b PE=2 SV=2	Myo5b Kiaa1119	8.86289e+08	9.08336e+08	8.30353e+08	8.00309e+08	8.08545e+08	8.28473e+08	6.75835e+08	8.09747e+08	9.73223e+08	8.71422e+08	7.8781e+08	9.25291e+08	7.45098e+08	7.67651e+08	8.06861e+08	9.14424e+08	6.71961e+08	6.60938e+08	6.41637e+08	9.05081e+08	29.7232	29.7587	29.6291	29.576	29.5908	29.6259	29.3321	29.5929	29.8582	29.6988	29.5533	29.7853	29.4729	29.5159	29.5877	29.7683	29.3238	29.2999	29.2572	29.7535
Q9R117	TYK2_MOUSE	Non-receptor tyrosine-protein kinase TYK2 OS=Mus musculus GN=Tyk2 PE=1 SV=2	Tyk2	8.69542e+08	9.26745e+08	1.07872e+09	8.20857e+08	7.8477e+08	7.9925e+08	7.62459e+08	7.87443e+08	7.23442e+08	8.28382e+08	7.80413e+08	8.84163e+08	6.5563e+08	7.45905e+08	6.79795e+08	9.02138e+08	8.15333e+08	7.42606e+08	6.87737e+08	8.43054e+08	29.6957	29.7876	30.0067	29.6126	29.5477	29.5741	29.5061	29.5526	29.4303	29.6257	29.5397	29.7197	29.2883	29.4744	29.3405	29.7488	29.6028	29.468	29.3573	29.651
Q07968	F13B_MOUSE	Coagulation factor XIII B chain OS=Mus musculus GN=F13b PE=1 SV=2	F13b Cf13b	7.69137e+08	7.61777e+08	7.85717e+08	9.94123e+08	8.37282e+08	7.97347e+08	1.01337e+09	7.37343e+08	8.8332e+08	8.43536e+08	8.02749e+08	7.6869e+08	7.34061e+08	8.00454e+08	8.45785e+08	8.70767e+08	7.22616e+08	7.11367e+08	7.95349e+08	6.27249e+08	29.5187	29.5048	29.5494	29.8888	29.6411	29.5706	29.9165	29.4578	29.7184	29.6519	29.5804	29.5178	29.4513	29.5762	29.6557	29.6977	29.4287	29.406	29.567	29.2245
P97494	GSH1_MOUSE	Glutamate--cysteine ligase catalytic subunit OS=Mus musculus GN=Gclc PE=2 SV=4	Gclc Glclc	7.72975e+08	6.50025e+08	9.48476e+08	9.05841e+08	8.20815e+08	7.97198e+08	7.88685e+08	6.15166e+08	8.72639e+08	7.57545e+08	9.43871e+08	7.55006e+08	7.83648e+08	8.72316e+08	1.04807e+09	7.87108e+08	6.88395e+08	7.57362e+08	8.37706e+08	6.89594e+08	29.5258	29.2759	29.821	29.7547	29.6125	29.5704	29.5549	29.1964	29.7008	29.4968	29.814	29.4919	29.5456	29.7003	29.9651	29.552	29.3587	29.4964	29.6419	29.3612
Q6P9J5	KANK4_MOUSE	KN motif and ankyrin repeat domain-containing protein 4 OS=Mus musculus GN=Kank4 PE=2 SV=1	Kank4 Ankrd38	7.32208e+08	8.4811e+08	7.87967e+08	8.6621e+08	6.931e+08	7.43129e+08	7.75919e+08	7.14734e+08	7.83148e+08	8.24042e+08	7.94539e+08	7.85364e+08	8.95506e+08	8.63687e+08	8.63288e+08	8.41347e+08	7.77302e+08	8.86004e+08	8.13425e+08	7.88111e+08	29.4477	29.6597	29.5536	29.6901	29.3685	29.469	29.5313	29.4128	29.5447	29.6181	29.5655	29.5488	29.7381	29.6859	29.6853	29.6481	29.5339	29.7227	29.5994	29.5538
Q5S248	TM11E_MOUSE	Transmembrane protease serine 11E OS=Mus musculus GN=Tmprss11e PE=1 SV=2	Tmprss11e Desc1	6.66053e+08	6.84778e+08	7.08798e+08	6.72681e+08	7.99402e+08	8.15738e+08	8.19829e+08	8.30103e+08	8.79086e+08	9.24915e+08	8.3241e+08	8.62602e+08	8.40772e+08	8.3424e+08	7.50639e+08	7.89107e+08	8.3773e+08	7.50761e+08	8.03829e+08	9.12746e+08	29.3111	29.3511	29.4008	29.3253	29.5743	29.6035	29.6107	29.6287	29.7114	29.7847	29.6327	29.6841	29.6471	29.6359	29.4835	29.5556	29.6419	29.4838	29.5823	29.7656
Q9CZ30	OLA1_MOUSE	Obg-like ATPase 1 OS=Mus musculus GN=Ola1 PE=1 SV=1	Ola1 Gtpbp9	8.16699e+08	1.18106e+09	8.62464e+08	7.17425e+08	5.41097e+08	7.19897e+08	7.9803e+08	1.01986e+09	6.70288e+08	6.26101e+08	7.60487e+08	8.20318e+08	8.28131e+08	6.04879e+08	8.16514e+08	9.16385e+08	5.09609e+08	1.08102e+09	8.66875e+08	8.14559e+08	29.6052	30.1374	29.6839	29.4183	29.0113	29.4232	29.5719	29.9257	29.3202	29.2218	29.5023	29.6116	29.6253	29.1721	29.6049	29.7714	28.9248	30.0097	29.6912	29.6014
P70206	PLXA1_MOUSE	Plexin-A1 OS=Mus musculus GN=Plxna1 PE=1 SV=1	Plxna1 Kiaa4053	7.74558e+08	7.476e+08	8.41854e+08	7.76401e+08	7.01533e+08	8.01649e+08	7.34223e+08	6.78346e+08	8.95654e+08	8.26205e+08	8.22614e+08	7.98012e+08	7.69755e+08	8.81557e+08	8.81833e+08	8.4158e+08	7.75352e+08	8.07852e+08	7.76545e+08	7.88985e+08	29.5288	29.4777	29.649	29.5322	29.3859	29.5784	29.4516	29.3374	29.7384	29.6219	29.6156	29.5718	29.5198	29.7155	29.7159	29.6485	29.5303	29.5895	29.5325	29.5554
Q9D0E1	HNRPM_MOUSE	Heterogeneous nuclear ribonucleoprotein M OS=Mus musculus GN=Hnrnpm PE=1 SV=3	Hnrnpm Hnrpm	7.81242e+08	7.66859e+08	8.355e+08	7.63379e+08	7.21769e+08	8.17317e+08	7.08143e+08	7.64538e+08	8.30259e+08	8.02444e+08	7.55766e+08	8.63278e+08	8.49309e+08	8.59966e+08	7.74298e+08	8.67303e+08	7.56349e+08	7.66392e+08	7.97029e+08	8.30402e+08	29.5412	29.5144	29.6381	29.5078	29.427	29.6063	29.3995	29.51	29.629	29.5798	29.4934	29.6852	29.6617	29.6797	29.5283	29.692	29.4945	29.5135	29.5701	29.6292
A2AF47	DOC11_MOUSE	Dedicator of cytokinesis protein 11 OS=Mus musculus GN=Dock11 PE=1 SV=1	Dock11 Ziz2	1.22505e+09	4.73553e+08	1.02709e+09	7.38555e+08	1.20033e+09	4.89342e+08	1.49233e+09	5.22021e+08	1.33645e+09	3.963e+08	8.55567e+08	7.16848e+08	3.94069e+08	7.2474e+08	1.18725e+09	7.87353e+08	4.4956e+08	4.26112e+08	9.48927e+08	4.40138e+08	30.1902	28.819	29.9359	29.4601	30.1608	28.8663	30.4749	28.9595	30.3158	28.562	29.6723	29.4171	28.5539	29.4329	30.145	29.5524	28.7439	28.6667	29.8217	28.7134
Q8R1Q8	DC1L1_MOUSE	Cytoplasmic dynein 1 light intermediate chain 1 OS=Mus musculus GN=Dync1li1 PE=1 SV=1	Dync1li1 Dncli1 Dnclic1	8.79537e+08	5.98006e+08	1.01779e+09	7.72762e+08	7.71095e+08	7.43354e+08	7.12054e+08	6.73231e+08	7.87771e+08	6.50449e+08	9.3659e+08	8.85508e+08	1.01806e+09	9.38785e+08	8.71414e+08	6.91259e+08	7.99595e+08	5.94655e+08	8.18508e+08	6.37433e+08	29.7122	29.1556	29.9228	29.5254	29.5223	29.4695	29.4074	29.3265	29.5532	29.2769	29.8028	29.7219	29.9232	29.8062	29.6988	29.3647	29.5747	29.1475	29.6084	29.2477
P62908	RS3_MOUSE	40S ribosomal protein S3 OS=Mus musculus GN=Rps3 PE=1 SV=1	Rps3	7.19537e+08	6.81295e+08	6.82485e+08	6.94428e+08	7.56938e+08	7.15586e+08	7.87316e+08	8.41089e+08	8.45203e+08	7.92836e+08	8.21144e+08	8.08692e+08	7.69303e+08	7.31918e+08	7.31725e+08	6.76773e+08	8.96215e+08	9.16351e+08	1.00162e+09	8.90798e+08	29.4225	29.3437	29.3462	29.3712	29.4956	29.4145	29.5524	29.6477	29.6547	29.5624	29.6131	29.591	29.519	29.4471	29.4467	29.3341	29.7393	29.7713	29.8997	29.7305
O89053	COR1A_MOUSE	Coronin-1A OS=Mus musculus GN=Coro1a PE=1 SV=5	Coro1a Coro1	6.99767e+08	8.09123e+08	7.54803e+08	8.48298e+08	7.14645e+08	8.07175e+08	7.48843e+08	6.64411e+08	8.13561e+08	8.55978e+08	8.56278e+08	7.2061e+08	8.32591e+08	8.68042e+08	9.01087e+08	8.34102e+08	6.79439e+08	7.89784e+08	7.52365e+08	7.913e+08	29.3823	29.5918	29.4915	29.66	29.4127	29.5883	29.4801	29.3075	29.5997	29.673	29.6735	29.4246	29.633	29.6932	29.7471	29.6356	29.3398	29.5569	29.4869	29.5596
A2AAE1	K1109_MOUSE	Uncharacterized protein KIAA1109 OS=Mus musculus GN=Kiaa1109 PE=1 SV=4	Kiaa1109 Fsa Kiaa1371	8.4867e+08	9.40425e+08	7.69174e+08	7.73345e+08	6.88343e+08	6.70826e+08	6.33506e+08	8.18837e+08	8.84772e+08	7.5757e+08	7.36344e+08	7.18654e+08	8.42023e+08	8.55963e+08	6.64404e+08	7.79487e+08	8.41813e+08	9.42737e+08	6.87766e+08	8.68768e+08	29.6606	29.8087	29.5187	29.5265	29.3586	29.3214	29.2388	29.609	29.7207	29.4968	29.4558	29.4207	29.6493	29.673	29.3075	29.538	29.6489	29.8123	29.3573	29.6944
Q3V3V9	LR16C_MOUSE	Leucine-rich repeat-containing protein 16C OS=Mus musculus GN=Rltpr PE=2 SV=2	Carmil2 Lrrc16c Rltpr	7.19336e+08	7.999e+08	8.09003e+08	7.89288e+08	6.93342e+08	6.81874e+08	7.10264e+08	6.28182e+08	8.74258e+08	8.75332e+08	9.47573e+08	7.26603e+08	7.98032e+08	7.74548e+08	7.34978e+08	7.04805e+08	9.10096e+08	8.04621e+08	8.21265e+08	9.17637e+08	29.4221	29.5752	29.5916	29.556	29.369	29.3449	29.4038	29.2266	29.7035	29.7053	29.8197	29.4366	29.5719	29.5288	29.4531	29.3926	29.7614	29.5837	29.6133	29.7733
O70194	EIF3D_MOUSE	Eukaryotic translation initiation factor 3 subunit D OS=Mus musculus GN=Eif3d PE=1 SV=2	Eif3d Eif3s7	9.85397e+08	6.40662e+08	1.05636e+09	9.05865e+08	8.63154e+08	7.28809e+08	8.64017e+08	8.51093e+08	7.92378e+08	5.83242e+08	9.30926e+08	8.91941e+08	7.04719e+08	8.88041e+08	7.47586e+08	8.67824e+08	4.71677e+08	4.1194e+08	8.68026e+08	5.56474e+08	29.8761	29.255	29.9765	29.7547	29.685	29.441	29.6865	29.6647	29.5616	29.1195	29.7941	29.7324	29.3925	29.7261	29.4777	29.6928	28.8132	28.6179	29.6932	29.0517
Q99JX3	GORS2_MOUSE	Golgi reassembly-stacking protein 2 OS=Mus musculus GN=Gorasp2 PE=1 SV=3	Gorasp2	8.47084e+08	7.43039e+08	9.20757e+08	7.78653e+08	6.0386e+08	8.26144e+08	6.43015e+08	6.13413e+08	7.29953e+08	7.62426e+08	6.99078e+08	9.3977e+08	7.70137e+08	8.84827e+08	8.55411e+08	8.79986e+08	8.35109e+08	7.39072e+08	7.26136e+08	8.04394e+08	29.6579	29.4689	29.7782	29.5364	29.1696	29.6218	29.2603	29.1923	29.4432	29.506	29.3809	29.8077	29.5205	29.7208	29.672	29.7129	29.6374	29.4611	29.4357	29.5833
Q8R366	IGSF8_MOUSE	Immunoglobulin superfamily member 8 OS=Mus musculus GN=Igsf8 PE=1 SV=2	Igsf8 Ewi2 Kct4 Pgrl	7.50901e+08	8.75863e+08	6.61934e+08	8.07514e+08	1.48709e+09	1.34231e+09	1.54137e+09	1.57421e+09	5.18777e+08	6.30562e+08	5.43702e+08	5.22144e+08	5.29753e+08	4.91648e+08	4.54685e+08	4.38001e+08	5.83129e+08	5.69645e+08	6.57505e+08	5.96744e+08	29.484	29.7061	29.3021	29.5889	30.4698	30.3221	30.5216	30.552	28.9505	29.2321	29.0182	28.9599	28.9807	28.8731	28.7603	28.7064	29.1192	29.0855	29.2924	29.1525
Q80UF4	SDCG8_MOUSE	Serologically defined colon cancer antigen 8 homolog OS=Mus musculus GN=Sdccag8 PE=1 SV=1	Sdccag8 Cccap	6.63287e+08	9.28312e+08	5.29357e+08	5.72465e+08	9.61995e+08	8.12573e+08	7.18378e+08	7.68604e+08	7.78638e+08	8.37607e+08	6.58184e+08	7.00602e+08	7.78741e+08	6.73333e+08	6.63838e+08	6.07698e+08	1.03788e+09	9.13998e+08	9.10874e+08	1.04162e+09	29.3051	29.79	28.9797	29.0926	29.8415	29.5979	29.4202	29.5177	29.5364	29.6417	29.2939	29.384	29.5366	29.3267	29.3063	29.1788	29.951	29.7676	29.7627	29.9562
Q04999	INHBB_MOUSE	Inhibin beta B chain OS=Mus musculus GN=Inhbb PE=2 SV=4	Inhbb	8.58062e+08	8.06584e+08	9.18999e+08	8.27718e+08	6.90201e+08	8.04882e+08	6.59782e+08	6.8445e+08	7.85709e+08	7.50877e+08	7.79889e+08	8.23588e+08	8.58758e+08	8.46767e+08	8.21151e+08	8.03519e+08	6.8751e+08	7.36229e+08	6.83195e+08	7.18739e+08	29.6765	29.5873	29.7755	29.6246	29.3624	29.5842	29.2974	29.3504	29.5494	29.484	29.5387	29.6173	29.6777	29.6574	29.6131	29.5818	29.3568	29.4556	29.3477	29.4209
Q3TTY5	K22E_MOUSE	Keratin, type II cytoskeletal 2 epidermal OS=Mus musculus GN=Krt2 PE=1 SV=1	Krt2 K2e Krt2-17 Krt2a	8.88239e+08	8.87148e+08	6.17369e+08	8.50097e+08	6.77843e+08	7.71307e+08	9.4636e+08	8.5201e+08	7.75349e+08	7.96453e+08	7.05112e+08	6.93952e+08	7.62947e+08	8.17341e+08	8.48814e+08	6.1816e+08	6.79552e+08	8.30062e+08	6.30741e+08	7.48696e+08	29.7264	29.7246	29.2016	29.6631	29.3364	29.5227	29.8178	29.6663	29.5303	29.569	29.3933	29.3703	29.507	29.6064	29.6609	29.2034	29.34	29.6286	29.2325	29.4798
P13595	NCAM1_MOUSE	Neural cell adhesion molecule 1 OS=Mus musculus GN=Ncam1 PE=1 SV=3	Ncam1 Ncam	7.78565e+08	8.93004e+08	7.34968e+08	7.3085e+08	8.21798e+08	8.11851e+08	8.23321e+08	8.30126e+08	7.3976e+08	8.12965e+08	6.55959e+08	6.51379e+08	7.9432e+08	7.0125e+08	7.6998e+08	7.50071e+08	7.40233e+08	8.22011e+08	7.37767e+08	7.85258e+08	29.5362	29.7341	29.4531	29.445	29.6142	29.5966	29.6169	29.6288	29.4625	29.5986	29.289	29.2789	29.5651	29.3854	29.5202	29.4825	29.4634	29.6146	29.4586	29.5486
Q9D4H8	CUL2_MOUSE	Cullin-2 OS=Mus musculus GN=Cul2 PE=1 SV=2	Cul2	6.99489e+08	1.12031e+09	6.38223e+08	6.96814e+08	6.93852e+08	9.68617e+08	4.74917e+08	7.83804e+08	6.62378e+08	9.14583e+08	8.07954e+08	6.37288e+08	8.39146e+08	8.03879e+08	5.46615e+08	6.99713e+08	7.36163e+08	1.1326e+09	4.33379e+08	1.08099e+09	29.3817	30.0613	29.2495	29.3762	29.3701	29.8514	28.8231	29.5459	29.3031	29.7685	29.5897	29.2474	29.6443	29.5824	29.026	29.3822	29.4554	30.077	28.6911	30.0097
Q9JKR6	HYOU1_MOUSE	Hypoxia up-regulated protein 1 OS=Mus musculus GN=Hyou1 PE=1 SV=1	Hyou1 Grp170	8.56355e+08	8.08855e+08	9.22802e+08	7.56233e+08	7.22072e+08	8.6006e+08	7.08107e+08	7.19552e+08	8.49293e+08	8.41247e+08	6.6418e+08	8.38487e+08	8.13585e+08	6.708e+08	6.51626e+08	7.77177e+08	7.85623e+08	7.79794e+08	5.61515e+08	7.65775e+08	29.6736	29.5913	29.7814	29.4943	29.4276	29.6799	29.3994	29.4225	29.6617	29.648	29.307	29.6432	29.5997	29.3213	29.2795	29.5337	29.5493	29.5385	29.0647	29.5123
Q61235	SNTB2_MOUSE	Beta-2-syntrophin OS=Mus musculus GN=Sntb2 PE=1 SV=2	Sntb2 Snt2b2	8.29849e+08	8.42246e+08	6.40925e+08	6.69695e+08	7.45873e+08	6.41345e+08	9.80898e+08	8.81126e+08	7.74056e+08	7.49204e+08	7.11267e+08	6.60132e+08	8.01461e+08	6.08406e+08	6.92231e+08	6.54824e+08	6.50388e+08	1.09438e+09	7.53019e+08	8.79332e+08	29.6283	29.6497	29.2556	29.3189	29.4744	29.2565	29.8695	29.7148	29.5279	29.4808	29.4058	29.2982	29.5781	29.1805	29.3667	29.2865	29.2767	30.0275	29.4881	29.7118
P80317	TCPZ_MOUSE	T-complex protein 1 subunit zeta OS=Mus musculus GN=Cct6a PE=1 SV=3	Cct6a Cct6 Cctz Cctz1	6.82346e+08	7.28767e+08	6.89161e+08	6.99263e+08	6.69845e+08	6.77439e+08	7.00082e+08	7.0761e+08	7.59798e+08	7.90315e+08	7.67875e+08	7.87101e+08	7.46481e+08	7.7887e+08	7.80301e+08	7.74874e+08	9.08808e+08	8.287e+08	9.20219e+08	8.53013e+08	29.3459	29.4409	29.3603	29.3813	29.3193	29.3355	29.3829	29.3984	29.501	29.5579	29.5163	29.552	29.4755	29.5368	29.5395	29.5294	29.7594	29.6263	29.7774	29.668
Q9D6X6	PRS23_MOUSE	Serine protease 23 OS=Mus musculus GN=Prss23 PE=2 SV=2	Prss23	5.10415e+08	9.04052e+08	6.62864e+08	1.35572e+09	7.47123e+08	4.50408e+08	8.51627e+08	3.68169e+08	5.81325e+08	4.87534e+08	1.27653e+09	5.34179e+08	6.64984e+08	6.00298e+08	1.07761e+09	5.11708e+08	1.09133e+09	6.18349e+08	1.35326e+09	3.55671e+08	28.9271	29.7518	29.3041	30.3364	29.4768	28.7467	29.6656	28.4558	29.1148	28.8609	30.2496	28.9927	29.3087	29.1611	30.0052	28.9307	30.0234	29.2038	30.3338	28.406
Q8R1B4	EIF3C_MOUSE	Eukaryotic translation initiation factor 3 subunit C OS=Mus musculus GN=Eif3c PE=1 SV=1	Eif3c Eif3s8	7.03762e+08	9.19415e+08	7.73246e+08	7.40632e+08	8.23032e+08	7.96035e+08	6.41367e+08	8.4984e+08	6.53599e+08	7.08226e+08	6.58185e+08	7.30913e+08	6.19453e+08	7.05363e+08	5.67754e+08	7.43024e+08	7.52541e+08	9.7673e+08	7.77921e+08	8.6111e+08	29.3905	29.7761	29.5264	29.4642	29.6164	29.5683	29.2566	29.6626	29.2838	29.3996	29.2939	29.4451	29.2064	29.3938	29.0807	29.4688	29.4872	29.8634	29.535	29.6816
P43277	H13_MOUSE	Histone H1.3 OS=Mus musculus GN=Hist1h1d PE=1 SV=2	H1-3 H1f3 Hist1h1d	4.17189e+08	5.82806e+08	3.10473e+08	4.43304e+08	1.13089e+09	9.15969e+08	1.29227e+09	1.45391e+09	8.24631e+08	6.79113e+08	5.86077e+08	4.01508e+08	6.35269e+08	6.92858e+08	4.20502e+08	7.04772e+08	8.65571e+08	8.92095e+08	8.07359e+08	9.37618e+08	28.6361	29.1184	28.2099	28.7237	30.0748	29.7707	30.2673	30.4373	29.6192	29.3391	29.1265	28.5809	29.2428	29.368	28.6475	29.3926	29.6891	29.7326	29.5886	29.8044
Q9DAS9	GBG12_MOUSE	Guanine nucleotide-binding protein G(I)/G(S)/G(O) subunit gamma-12 OS=Mus musculus GN=Gng12 PE=1 SV=3	Gng12	7.3038e+08	7.49472e+08	7.26037e+08	8.00249e+08	8.38971e+08	9.60017e+08	8.86646e+08	8.87695e+08	7.25431e+08	7.38382e+08	6.837e+08	7.13165e+08	7.21538e+08	7.0198e+08	6.58829e+08	7.0114e+08	7.03104e+08	6.42483e+08	6.3572e+08	7.67964e+08	29.4441	29.4813	29.4355	29.5759	29.644	29.8385	29.7238	29.7255	29.4343	29.4598	29.3488	29.4097	29.4265	29.3869	29.2953	29.3851	29.3892	29.2591	29.2438	29.5165
Q9Z1X4	ILF3_MOUSE	Interleukin enhancer-binding factor 3 OS=Mus musculus GN=Ilf3 PE=1 SV=2	Ilf3	8.42311e+08	6.63145e+08	8.61653e+08	8.44285e+08	7.87391e+08	7.50624e+08	6.91827e+08	6.68607e+08	7.55142e+08	6.16457e+08	7.56717e+08	8.3432e+08	7.83416e+08	8.06656e+08	8.14244e+08	7.64083e+08	8.48223e+08	5.71405e+08	7.24164e+08	5.84111e+08	29.6498	29.3047	29.6825	29.6532	29.5525	29.4835	29.3658	29.3166	29.4922	29.1994	29.4952	29.636	29.5452	29.5874	29.6009	29.5092	29.6599	29.0899	29.4317	29.1217
Q99MY8	ASH1L_MOUSE	Histone-lysine N-methyltransferase ASH1L OS=Mus musculus GN=Ash1l PE=1 SV=3	Ash1l	5.89132e+08	7.08862e+08	6.56212e+08	6.96904e+08	6.49746e+08	6.44008e+08	7.26812e+08	5.81197e+08	6.3861e+08	6.91524e+08	6.8322e+08	6.75442e+08	8.82349e+08	9.63128e+08	9.08756e+08	8.20892e+08	6.6889e+08	9.5607e+08	1.10906e+09	7.16434e+08	29.134	29.4009	29.2896	29.3764	29.2753	29.2625	29.437	29.1145	29.2504	29.3652	29.3478	29.3313	29.7168	29.8432	29.7593	29.6126	29.3172	29.8325	30.0467	29.4163
Q1PSW8	LIN41_MOUSE	E3 ubiquitin-protein ligase TRIM71 OS=Mus musculus GN=Trim71 PE=1 SV=1	Trim71 Gm1127 Lin41	8.68389e+08	3.7455e+08	1.16716e+09	7.56219e+08	4.48325e+08	5.24784e+08	5.17797e+08	3.93487e+08	7.63996e+08	4.77882e+08	9.17034e+08	9.97588e+08	8.39231e+08	1.07178e+09	1.42429e+09	8.71492e+08	7.39656e+08	3.94267e+08	9.61992e+08	4.07908e+08	29.6938	28.4806	30.1204	29.4942	28.74	28.9671	28.9478	28.5517	29.509	28.8321	29.7724	29.8939	29.6445	29.9974	30.4076	29.6989	29.4623	28.5546	29.8414	28.6037
Q922B2	SYDC_MOUSE	Aspartate--tRNA ligase, cytoplasmic OS=Mus musculus GN=Dars PE=2 SV=2	Dars1 Dars	6.92894e+08	8.21261e+08	7.12416e+08	7.51185e+08	7.36429e+08	7.01853e+08	7.47585e+08	6.83298e+08	7.80401e+08	7.64507e+08	7.99312e+08	7.09473e+08	8.18037e+08	7.44779e+08	7.74568e+08	6.82091e+08	7.44742e+08	7.44815e+08	7.35447e+08	7.5331e+08	29.3681	29.6133	29.4081	29.4846	29.456	29.3866	29.4777	29.3479	29.5396	29.51	29.5742	29.4022	29.6076	29.4722	29.5288	29.3454	29.4722	29.4723	29.454	29.4887
Q00993	UFO_MOUSE	Tyrosine-protein kinase receptor UFO OS=Mus musculus GN=Axl PE=1 SV=2	Axl Ark Ufo	7.04897e+08	8.00562e+08	7.82595e+08	7.03069e+08	7.1513e+08	6.54988e+08	6.57126e+08	6.20809e+08	7.1063e+08	7.51022e+08	6.70811e+08	6.89268e+08	7.01947e+08	8.28628e+08	7.44282e+08	8.72228e+08	7.43316e+08	8.42479e+08	7.88706e+08	8.5254e+08	29.3928	29.5764	29.5437	29.3891	29.4136	29.2869	29.2916	29.2096	29.4045	29.4843	29.3213	29.3605	29.3868	29.6261	29.4713	29.7001	29.4694	29.6501	29.5549	29.6672
A3KGB4	TBC8B_MOUSE	TBC1 domain family member 8B OS=Mus musculus GN=Tbc1d8b PE=2 SV=1	Tbc1d8b	6.75991e+08	7.44684e+08	7.86545e+08	7.17577e+08	6.65015e+08	7.64543e+08	6.68902e+08	6.12172e+08	7.38885e+08	8.01623e+08	7.80374e+08	8.46279e+08	7.34404e+08	7.89979e+08	7.96596e+08	7.83712e+08	7.10719e+08	7.5476e+08	7.40742e+08	7.18641e+08	29.3324	29.4721	29.551	29.4186	29.3088	29.51	29.3172	29.1894	29.4608	29.5783	29.5396	29.6566	29.452	29.5572	29.5693	29.5457	29.4047	29.4914	29.4644	29.4207
Q61503	5NTD_MOUSE	5'-nucleotidase OS=Mus musculus GN=Nt5e PE=1 SV=2	Nt5e Nt5 Nte	9.00162e+08	1.02254e+09	6.31427e+08	7.71226e+08	6.9699e+08	5.84803e+08	6.10791e+08	6.7009e+08	6.98981e+08	8.26202e+08	6.27412e+08	6.41767e+08	8.31851e+08	7.67938e+08	7.0914e+08	6.74111e+08	7.21796e+08	8.17338e+08	8.05735e+08	7.9605e+08	29.7456	29.9295	29.234	29.5226	29.3766	29.1234	29.1861	29.3198	29.3807	29.6219	29.2248	29.2575	29.6318	29.5164	29.4015	29.3284	29.427	29.6064	29.5857	29.5683
O88844	IDHC_MOUSE	Isocitrate dehydrogenase [NADP] cytoplasmic OS=Mus musculus GN=Idh1 PE=1 SV=2	Idh1	1.24284e+09	9.4544e+08	9.98115e+08	1.10922e+09	5.97613e+08	6.87694e+08	6.14145e+08	7.42047e+08	6.44791e+08	5.90973e+08	5.82791e+08	7.27311e+08	6.5572e+08	7.9726e+08	6.76323e+08	6.34412e+08	6.32034e+08	6.44059e+08	5.98714e+08	6.49071e+08	30.211	29.8164	29.8946	30.0469	29.1546	29.3572	29.194	29.4669	29.2643	29.1385	29.1184	29.438	29.2885	29.5705	29.3331	29.2408	29.2354	29.2626	29.1573	29.2738
P05132	KAPCA_MOUSE	cAMP-dependent protein kinase catalytic subunit alpha OS=Mus musculus GN=Prkaca PE=1 SV=3	Prkaca Pkaca	7.1736e+08	7.99377e+08	6.92384e+08	7.27998e+08	6.76974e+08	7.94282e+08	7.07536e+08	6.3782e+08	7.34865e+08	7.79481e+08	7.35322e+08	7.27565e+08	7.96584e+08	7.59171e+08	7.92057e+08	7.69384e+08	7.20184e+08	7.27056e+08	6.71822e+08	7.8234e+08	29.4181	29.5743	29.367	29.4394	29.3345	29.5651	29.3982	29.2486	29.4529	29.5379	29.4538	29.4385	29.5693	29.4999	29.561	29.5191	29.4238	29.4375	29.3235	29.5432
P50431	GLYC_MOUSE	Serine hydroxymethyltransferase, cytosolic OS=Mus musculus GN=Shmt1 PE=1 SV=3	Shmt1 Shmt	6.92843e+08	5.93179e+08	7.98011e+08	1.03811e+09	5.43424e+08	7.34519e+08	9.05739e+08	5.6337e+08	7.8073e+08	7.74455e+08	9.79085e+08	6.02019e+08	5.10512e+08	6.95197e+08	1.06133e+09	7.51102e+08	4.16731e+08	8.05375e+08	7.75288e+08	6.63132e+08	29.368	29.1439	29.5718	29.9513	29.0175	29.4522	29.7545	29.0695	29.5402	29.5286	29.8669	29.1652	28.9274	29.3728	29.9832	29.4844	28.6345	29.5851	29.5302	29.3047
P62242	RS8_MOUSE	40S ribosomal protein S8 OS=Mus musculus GN=Rps8 PE=1 SV=2	Rps8	4.39724e+08	5.69337e+08	4.09671e+08	4.92964e+08	7.85866e+08	7.04467e+08	7.50451e+08	8.58863e+08	7.25701e+08	8.33521e+08	7.05837e+08	6.2232e+08	6.11101e+08	5.5845e+08	5.34872e+08	5.76872e+08	1.11158e+09	1.07396e+09	1.15042e+09	1.1434e+09	28.712	29.0847	28.6099	28.8769	29.5497	29.392	29.4832	29.6779	29.4348	29.6346	29.3948	29.2131	29.1868	29.0569	28.9946	29.1037	30.05	30.0003	30.0995	30.0907
Q8BY89	CTL2_MOUSE	Choline transporter-like protein 2 OS=Mus musculus GN=Slc44a2 PE=1 SV=2	Slc44a2 Ctl2	5.8892e+08	6.10031e+08	6.20668e+08	6.10284e+08	8.78628e+08	8.82554e+08	9.63117e+08	8.94197e+08	6.79304e+08	7.70922e+08	7.17946e+08	7.58507e+08	6.41532e+08	6.33217e+08	6.16511e+08	5.94432e+08	7.47534e+08	8.17253e+08	7.42024e+08	8.52515e+08	29.1335	29.1843	29.2092	29.1849	29.7107	29.7171	29.8431	29.736	29.3395	29.522	29.4193	29.4986	29.2569	29.2381	29.1996	29.1469	29.4776	29.6062	29.4669	29.6671
Q78JT3	3HAO_MOUSE	3-hydroxyanthranilate 3,4-dioxygenase OS=Mus musculus GN=Haao PE=1 SV=1	Haao	8.41304e+08	7.69723e+08	8.35028e+08	7.58213e+08	6.61187e+08	6.73036e+08	6.33306e+08	6.43589e+08	8.27808e+08	7.57463e+08	7.30082e+08	8.69496e+08	8.09272e+08	7.48577e+08	6.65844e+08	7.39281e+08	6.64496e+08	6.23948e+08	6.4447e+08	7.01388e+08	29.6481	29.5198	29.6372	29.498	29.3005	29.3261	29.2383	29.2616	29.6247	29.4966	29.4435	29.6956	29.5921	29.4796	29.3106	29.4615	29.3077	29.2169	29.2635	29.3856
P09405	NUCL_MOUSE	Nucleolin OS=Mus musculus GN=Ncl PE=1 SV=2	Ncl Nuc	8.43137e+08	1.01576e+09	8.07769e+08	8.19567e+08	7.10219e+08	7.02423e+08	8.21218e+08	8.52415e+08	6.49e+08	6.4814e+08	5.93217e+08	5.98616e+08	6.43337e+08	7.05415e+08	6.81791e+08	7.31747e+08	6.03789e+08	7.05342e+08	6.85435e+08	7.31459e+08	29.6512	29.9199	29.5894	29.6103	29.4037	29.3878	29.6132	29.667	29.2736	29.2717	29.144	29.1571	29.261	29.3939	29.3448	29.4468	29.1695	29.3937	29.3524	29.4462
Q91X83	METK1_MOUSE	S-adenosylmethionine synthase isoform type-1 OS=Mus musculus GN=Mat1a PE=2 SV=1	Mat1a	7.27982e+08	6.93624e+08	7.62353e+08	7.18887e+08	7.02415e+08	7.574e+08	7.61749e+08	6.91074e+08	7.23591e+08	7.35698e+08	7.13183e+08	6.99092e+08	7.21622e+08	7.7443e+08	7.89051e+08	7.79056e+08	6.01729e+08	7.69299e+08	6.56483e+08	7.52906e+08	29.4393	29.3696	29.5059	29.4212	29.3877	29.4965	29.5047	29.3643	29.4306	29.4545	29.4097	29.3809	29.4267	29.5286	29.5555	29.5372	29.1645	29.519	29.2902	29.4879
O08709	PRDX6_MOUSE	Peroxiredoxin-6 OS=Mus musculus GN=Prdx6 PE=1 SV=3	Prdx6 Aop2 Ltw4 Prdx5	6.85701e+08	6.63406e+08	7.19855e+08	7.23841e+08	7.14808e+08	7.4825e+08	7.4127e+08	7.47266e+08	7.55309e+08	8.02857e+08	7.43357e+08	6.97794e+08	7.05783e+08	7.07469e+08	7.57738e+08	6.97412e+08	6.16624e+08	7.64354e+08	6.68119e+08	7.72968e+08	29.353	29.3053	29.4231	29.4311	29.413	29.4789	29.4654	29.477	29.4925	29.5806	29.4695	29.3782	29.3947	29.3981	29.4971	29.3774	29.1998	29.5097	29.3155	29.5258
Q6KCD5	NIPBL_MOUSE	Nipped-B-like protein OS=Mus musculus GN=Nipbl PE=1 SV=1	Nipbl Scc2	3.78866e+08	3.15587e+08	1.28293e+09	7.17085e+08	1.46387e+09	1.10905e+09	6.94729e+08	2.63987e+08	6.4846e+08	3.71396e+08	8.23912e+08	3.83505e+08	5.06978e+08	3.68292e+08	9.09624e+08	2.09712e+09	3.85448e+08	4.36992e+08	7.00201e+08	5.12319e+08	28.4971	28.2335	30.2568	29.4176	30.4471	30.0467	29.3719	27.9759	29.2724	28.4684	29.6179	28.5147	28.9173	28.4563	29.7607	30.9658	28.522	28.703	29.3832	28.9325
Q9WTI7	MYO1C_MOUSE	Unconventional myosin-Ic OS=Mus musculus GN=Myo1c PE=1 SV=2	Myo1c	7.35652e+08	6.91357e+08	6.65724e+08	6.99511e+08	6.52243e+08	6.43391e+08	6.71709e+08	7.17281e+08	6.9451e+08	6.79997e+08	6.6467e+08	7.47504e+08	7.19738e+08	7.20223e+08	6.97186e+08	7.06123e+08	8.11208e+08	7.83155e+08	8.32359e+08	8.29754e+08	29.4544	29.3649	29.3103	29.3818	29.2808	29.2611	29.3233	29.418	29.3714	29.341	29.3081	29.4775	29.4229	29.4239	29.377	29.3953	29.5955	29.5447	29.6326	29.6281
P70701	WN10A_MOUSE	Protein Wnt-10a OS=Mus musculus GN=Wnt10a PE=2 SV=1	Wnt10a	7.99903e+08	6.91345e+08	7.69633e+08	7.33189e+08	6.46636e+08	6.48493e+08	6.11298e+08	6.45674e+08	7.63131e+08	6.37365e+08	7.14411e+08	7.88157e+08	9.02871e+08	7.91625e+08	7.54884e+08	7.86965e+08	7.79427e+08	5.81993e+08	6.46485e+08	6.47734e+08	29.5752	29.3648	29.5196	29.4496	29.2684	29.2725	29.1873	29.2662	29.5074	29.2475	29.4122	29.5539	29.7499	29.5602	29.4917	29.5517	29.5378	29.1164	29.268	29.2708
Q03350	TSP2_MOUSE	Thrombospondin-2 OS=Mus musculus GN=Thbs2 PE=1 SV=2	Thbs2 Tsp2	7.27266e+08	6.94178e+08	8.32505e+08	7.85744e+08	7.16536e+08	6.87507e+08	7.0912e+08	5.82185e+08	7.06055e+08	6.48242e+08	7.26628e+08	7.29533e+08	7.02765e+08	7.40653e+08	8.05994e+08	8.3873e+08	6.91154e+08	5.86768e+08	7.2043e+08	6.63399e+08	29.4379	29.3707	29.6329	29.5495	29.4165	29.3568	29.4015	29.1169	29.3952	29.272	29.4366	29.4424	29.3885	29.4642	29.5862	29.6436	29.3644	29.1282	29.4243	29.3053
P45376	ALDR_MOUSE	Aldose reductase OS=Mus musculus GN=Akr1b1 PE=1 SV=3	Akr1b1 Akr1b3 Aldor1 Aldr1 Alr2	7.19087e+08	7.4407e+08	7.40742e+08	7.32798e+08	7.94689e+08	7.96994e+08	7.84448e+08	7.40354e+08	6.62161e+08	6.60844e+08	6.71757e+08	6.20042e+08	6.83944e+08	7.06778e+08	7.27649e+08	6.7979e+08	7.01651e+08	7.15618e+08	7.20026e+08	6.78409e+08	29.4216	29.4709	29.4644	29.4488	29.5658	29.57	29.5471	29.4636	29.3026	29.2997	29.3234	29.2078	29.3493	29.3967	29.4387	29.3405	29.3862	29.4146	29.4235	29.3376
Q505K2	F16A1_MOUSE	Protein FAM160A1 OS=Mus musculus GN=Fam160a1 PE=2 SV=2	Fam160a1	5.56666e+08	1.14222e+09	5.23115e+08	1.06793e+09	1.00683e+09	8.02206e+08	1.02859e+09	5.37985e+08	7.95309e+08	8.11993e+08	7.32109e+08	3.90888e+08	4.8513e+08	5.23284e+08	4.86341e+08	7.51417e+08	5.65123e+08	6.42094e+08	4.56131e+08	9.08296e+08	29.0522	30.0892	28.9626	29.9922	29.9072	29.5794	29.938	29.003	29.5669	29.5969	29.4475	28.5422	28.8538	28.963	28.8574	29.485	29.074	29.2582	28.7649	29.7586
P46412	GPX3_MOUSE	Glutathione peroxidase 3 OS=Mus musculus GN=Gpx3 PE=2 SV=2	Gpx3	7.19545e+08	6.10595e+08	7.82158e+08	7.7471e+08	7.34883e+08	7.17767e+08	8.41821e+08	6.66538e+08	7.59666e+08	7.19898e+08	8.39703e+08	7.16995e+08	6.0136e+08	6.7202e+08	7.76736e+08	7.02892e+08	4.71555e+08	7.38546e+08	6.29844e+08	7.20525e+08	29.4225	29.1856	29.5429	29.5291	29.4529	29.4189	29.6489	29.3121	29.5008	29.4232	29.6453	29.4174	29.1637	29.3239	29.5328	29.3887	28.8129	29.4601	29.2304	29.4245
P46471	PRS7_MOUSE	26S protease regulatory subunit 7 OS=Mus musculus GN=Psmc2 PE=1 SV=5	Psmc2 Mss1	6.62397e+08	7.11953e+08	6.9322e+08	7.00711e+08	6.17628e+08	6.66705e+08	6.66703e+08	6.16186e+08	7.27451e+08	7.29789e+08	7.17108e+08	7.07363e+08	7.30244e+08	7.84484e+08	7.98933e+08	7.78495e+08	6.58608e+08	7.37659e+08	7.16979e+08	7.31093e+08	29.3031	29.4072	29.3687	29.3842	29.2022	29.3125	29.3125	29.1988	29.4383	29.4429	29.4176	29.3979	29.4438	29.5472	29.5735	29.5361	29.2948	29.4584	29.4174	29.4455
Q3UMY5	EMAL4_MOUSE	Echinoderm microtubule-associated protein-like 4 OS=Mus musculus GN=Eml4 PE=1 SV=1	Eml4	1.29049e+09	3.31421e+07	8.88637e+08	7.249e+08	8.73569e+08	4.56721e+07	5.46022e+07	8.69965e+08	1.20061e+09	3.16826e+07	7.96323e+08	1.33841e+09	1.45696e+09	1.0571e+09	8.00146e+08	4.2272e+08	1.47935e+09	3.23867e+07	7.25392e+08	2.73315e+07	30.2653	24.9822	29.727	29.4332	29.7023	25.4448	25.7025	29.6964	30.1611	24.9172	29.5688	30.3179	30.4403	29.9775	29.5757	28.6551	30.4623	24.9489	29.4342	24.7041
Q80TV8	CLAP1_MOUSE	CLIP-associating protein 1 OS=Mus musculus GN=Clasp1 PE=1 SV=2	Clasp1 Kiaa0622	8.05585e+08	7.29386e+08	8.31647e+08	8.73661e+08	6.25818e+08	7.04665e+08	7.52486e+08	6.46116e+08	6.52137e+08	5.8532e+08	6.83761e+08	6.37272e+08	7.08376e+08	6.87694e+08	6.41124e+08	6.48003e+08	6.52338e+08	7.50327e+08	6.44109e+08	8.85153e+08	29.5855	29.4421	29.6314	29.7025	29.2212	29.3924	29.4871	29.2672	29.2806	29.1247	29.3489	29.2473	29.3999	29.3572	29.256	29.2714	29.281	29.4829	29.2627	29.7214
Q810B6	ANFY1_MOUSE	Ankyrin repeat and FYVE domain-containing protein 1 OS=Mus musculus GN=Ankfy1 PE=2 SV=2	Ankfy1 Ankhzn Kiaa1255	8.08215e+08	9.45915e+08	8.69849e+08	6.07468e+08	5.76916e+08	7.17499e+08	4.74173e+08	6.14315e+08	6.31381e+08	6.78405e+08	5.66011e+08	1.04105e+09	7.84529e+08	6.80269e+08	6.39752e+08	7.73973e+08	6.84933e+08	6.3366e+08	5.08463e+08	9.02046e+08	29.5902	29.8171	29.6962	29.1782	29.1038	29.4184	28.8208	29.1944	29.2339	29.3376	29.0763	29.9554	29.5473	29.3415	29.2529	29.5277	29.3514	29.2391	28.9216	29.7486
Q5SUS0	FBW10_MOUSE	F-box/WD repeat-containing protein 10 OS=Mus musculus GN=Fbxw10 PE=2 SV=1	Fbxw10	6.18562e+08	5.90126e+08	8.59778e+08	5.92789e+08	8.38836e+08	1.31023e+09	8.25967e+08	9.29604e+08	4.91286e+08	7.32341e+08	5.60112e+08	8.34843e+08	6.44135e+08	7.05583e+08	6.16015e+08	7.57605e+08	5.79012e+08	5.86835e+08	6.40435e+08	3.69895e+08	29.2043	29.1364	29.6794	29.1429	29.6438	30.2872	29.6215	29.792	28.872	29.4479	29.0611	29.6369	29.2628	29.3942	29.1984	29.4969	29.109	29.1284	29.2545	28.4625
P49312	ROA1_MOUSE	Heterogeneous nuclear ribonucleoprotein A1 OS=Mus musculus GN=Hnrnpa1 PE=1 SV=2	Hnrnpa1 Fli-2 Hnrpa1 Tis	8.01438e+08	7.55913e+08	7.98439e+08	4.81216e+08	7.70103e+08	7.72493e+08	5.08151e+08	8.14849e+08	8.59902e+08	7.89651e+08	5.88669e+08	8.8534e+08	8.27022e+08	7.02176e+08	4.4513e+08	6.67828e+08	8.13681e+08	5.80408e+08	4.91882e+08	7.05152e+08	29.578	29.4936	29.5726	28.8421	29.5205	29.5249	28.9207	29.602	29.6796	29.5566	29.1329	29.7217	29.6234	29.3873	28.7297	29.3149	29.5999	29.1125	28.8737	29.3934
Q6NZJ6	IF4G1_MOUSE	Eukaryotic translation initiation factor 4 gamma 1 OS=Mus musculus GN=Eif4g1 PE=1 SV=1	Eif4g1	7.37772e+08	6.72145e+08	8.07598e+08	7.66842e+08	7.14904e+08	7.98326e+08	7.05504e+08	6.78817e+08	7.12858e+08	7.53971e+08	7.56609e+08	7.38721e+08	6.4851e+08	6.1526e+08	6.24955e+08	6.86871e+08	6.05262e+08	7.14757e+08	6.10213e+08	6.93615e+08	29.4586	29.3242	29.5891	29.5144	29.4132	29.5724	29.3941	29.3384	29.409	29.4899	29.495	29.4605	29.2726	29.1966	29.2192	29.3555	29.173	29.4129	29.1847	29.3696
P70296	PEBP1_MOUSE	Phosphatidylethanolamine-binding protein 1 OS=Mus musculus GN=Pebp1 PE=1 SV=3	Pebp1 Pbp Pebp	7.02929e+08	6.27954e+08	7.42245e+08	7.84876e+08	8.15508e+08	7.87138e+08	8.41466e+08	7.45449e+08	6.67725e+08	6.45111e+08	7.2842e+08	6.54381e+08	6.09911e+08	7.37532e+08	7.62846e+08	6.57538e+08	5.60305e+08	6.03395e+08	7.23578e+08	6.41528e+08	29.3888	29.2261	29.4673	29.5479	29.6031	29.552	29.6483	29.4735	29.3147	29.265	29.4402	29.2856	29.184	29.4581	29.5068	29.2925	29.0616	29.1685	29.4306	29.2569
Q9JL18	BACE2_MOUSE	Beta-secretase 2 OS=Mus musculus GN=Bace2 PE=2 SV=1	Bace2	6.50132e+08	9.77773e+08	6.06718e+08	5.42369e+08	7.55925e+08	3.58609e+08	7.48582e+08	7.9704e+08	6.50889e+08	7.56503e+08	7.29265e+08	4.84445e+08	7.6924e+08	4.5136e+08	5.34664e+08	6.12535e+08	6.85583e+08	1.2637e+09	5.65171e+08	1.06645e+09	29.2762	29.8649	29.1765	29.0147	29.4937	28.4178	29.4796	29.5701	29.2778	29.4948	29.4419	28.8518	29.5189	28.7497	28.9941	29.1902	29.3528	30.235	29.0741	29.9902
Q9D1A2	CNDP2_MOUSE	Cytosolic non-specific dipeptidase OS=Mus musculus GN=Cndp2 PE=1 SV=1	Cndp2 Cn2	7.54976e+08	6.17274e+08	7.88879e+08	7.12481e+08	6.22822e+08	7.43567e+08	6.54409e+08	6.3804e+08	7.21692e+08	6.61055e+08	6.97981e+08	7.24186e+08	7.59655e+08	7.93902e+08	7.98477e+08	7.49205e+08	6.79888e+08	5.7951e+08	6.59891e+08	6.2163e+08	29.4919	29.2013	29.5552	29.4083	29.2142	29.4699	29.2856	29.2491	29.4268	29.3002	29.3786	29.4318	29.5008	29.5644	29.5727	29.4808	29.3407	29.1103	29.2977	29.2115
Q8R5H1	UBP15_MOUSE	Ubiquitin carboxyl-terminal hydrolase 15 OS=Mus musculus GN=Usp15 PE=2 SV=1	Usp15 Kiaa0529	9.53678e+08	4.44489e+08	7.55735e+08	7.37789e+08	7.32802e+08	5.53692e+08	6.45662e+08	7.28024e+08	7.13342e+08	4.0755e+08	7.1723e+08	8.41078e+08	9.32797e+08	7.87712e+08	7.61931e+08	7.99118e+08	7.64227e+08	4.40386e+08	7.3832e+08	5.13179e+08	29.8289	28.7276	29.4933	29.4586	29.4488	29.0445	29.2662	29.4394	29.41	28.6024	29.4179	29.6477	29.797	29.5531	29.5051	29.5738	29.5094	28.7142	29.4597	28.9349
P14206	RSSA_MOUSE	40S ribosomal protein SA OS=Mus musculus GN=Rpsa PE=1 SV=4	Rpsa Lamr1 P40-8	6.05868e+08	6.3614e+08	5.8772e+08	5.91073e+08	6.03251e+08	6.136e+08	6.08646e+08	6.27751e+08	6.91947e+08	7.39353e+08	6.82501e+08	7.16215e+08	6.90934e+08	7.00034e+08	7.33599e+08	6.96473e+08	8.30993e+08	8.77343e+08	8.47839e+08	8.37286e+08	29.1744	29.2448	29.1306	29.1388	29.1682	29.1927	29.181	29.2256	29.3661	29.4617	29.3463	29.4158	29.364	29.3828	29.4504	29.3755	29.6303	29.7086	29.6592	29.6411
A2AN08	UBR4_MOUSE	E3 ubiquitin-protein ligase UBR4 OS=Mus musculus GN=Ubr4 PE=1 SV=1	Ubr4 Kiaa0462 Zubr1	6.85774e+08	7.10878e+08	7.21896e+08	7.6625e+08	6.29108e+08	6.49097e+08	6.48296e+08	6.66129e+08	7.7318e+08	7.38832e+08	7.21861e+08	6.25025e+08	6.92861e+08	7.21076e+08	6.93637e+08	6.90678e+08	7.74778e+08	5.96098e+08	6.95236e+08	6.87111e+08	29.3532	29.405	29.4272	29.5132	29.2287	29.2739	29.2721	29.3112	29.5262	29.4607	29.4271	29.2193	29.368	29.4256	29.3696	29.3634	29.5292	29.151	29.3729	29.356
Q99JY9	ARP3_MOUSE	Actin-related protein 3 OS=Mus musculus GN=Actr3 PE=1 SV=3	Actr3 Arp3	7.3847e+08	6.69166e+08	7.51463e+08	7.40303e+08	6.86205e+08	6.42688e+08	6.28026e+08	6.2922e+08	6.88999e+08	6.29797e+08	6.99113e+08	7.3431e+08	6.92028e+08	7.46545e+08	7.12823e+08	7.33362e+08	7.17841e+08	6.46042e+08	7.52829e+08	6.34684e+08	29.46	29.3178	29.4851	29.4635	29.3541	29.2595	29.2263	29.229	29.3599	29.2303	29.381	29.4518	29.3663	29.4757	29.409	29.45	29.4191	29.2671	29.4877	29.2415
Q8CG16	C1RA_MOUSE	Complement C1r-A subcomponent OS=Mus musculus GN=C1ra PE=1 SV=1	C1ra C1r	7.20136e+08	7.48134e+08	7.73695e+08	7.10702e+08	9.66452e+08	8.06395e+08	9.96659e+08	1.01198e+09	6.07548e+08	6.15299e+08	6.43706e+08	5.17564e+08	6.19874e+08	5.11995e+08	6.87003e+08	6.45123e+08	5.17285e+08	5.39984e+08	5.90509e+08	5.65281e+08	29.4237	29.4787	29.5272	29.4047	29.8481	29.5869	29.8925	29.9145	29.1784	29.1967	29.2618	28.9472	29.2074	28.9316	29.3557	29.265	28.9464	29.0083	29.1374	29.0744
Q68EF4	GRM4_MOUSE	Metabotropic glutamate receptor 4 OS=Mus musculus GN=Grm4 PE=2 SV=2	Grm4 Gprc1d Mglur4	7.17962e+08	7.70173e+08	7.51746e+08	8.54301e+08	6.61451e+08	7.07638e+08	7.69618e+08	6.82225e+08	7.06278e+08	7.102e+08	8.03276e+08	6.47653e+08	6.34106e+08	5.03643e+08	5.53817e+08	6.16987e+08	7.34579e+08	6.87485e+08	5.50393e+08	7.22354e+08	29.4193	29.5206	29.4857	29.6702	29.3011	29.3984	29.5196	29.3457	29.3957	29.4036	29.5813	29.2706	29.2401	28.9078	29.0448	29.2007	29.4523	29.3568	29.0359	29.4281
Q9ESE1	LRBA_MOUSE	Lipopolysaccharide-responsive and beige-like anchor protein OS=Mus musculus GN=Lrba PE=1 SV=1	Lrba Bgl Lba	8.41684e+08	5.49449e+08	8.54403e+08	8.25836e+08	6.88552e+08	6.20976e+08	5.63621e+08	5.91318e+08	7.05467e+08	5.59359e+08	7.56664e+08	7.64413e+08	6.34805e+08	7.80112e+08	7.99802e+08	7.2912e+08	6.63741e+08	5.22771e+08	7.83535e+08	5.39073e+08	29.6487	29.0334	29.6703	29.6213	29.359	29.21	29.0702	29.1394	29.394	29.0592	29.4951	29.5098	29.2417	29.5391	29.5751	29.4416	29.306	28.9616	29.5454	29.0059
P60843	IF4A1_MOUSE	Eukaryotic initiation factor 4A-I OS=Mus musculus GN=Eif4a1 PE=2 SV=1	Eif4a1 Ddx2a Eif4a	6.0509e+08	7.78047e+08	7.10516e+08	6.96903e+08	6.52822e+08	6.6766e+08	6.43588e+08	5.78615e+08	6.49418e+08	6.4645e+08	6.85974e+08	5.8302e+08	6.54715e+08	6.44519e+08	6.69712e+08	6.98126e+08	6.5238e+08	9.20241e+08	7.34063e+08	8.77551e+08	29.1726	29.5353	29.4043	29.3764	29.2821	29.3145	29.2616	29.108	29.2746	29.268	29.3536	29.119	29.2863	29.2636	29.319	29.3789	29.2811	29.7774	29.4513	29.7089
P09803	CADH1_MOUSE	Cadherin-1 OS=Mus musculus GN=Cdh1 PE=1 SV=1	Cdh1	6.55338e+08	8.8833e+08	6.14132e+08	7.74097e+08	7.90762e+08	6.70011e+08	8.61316e+08	8.98319e+08	5.69961e+08	5.99435e+08	5.49509e+08	5.40017e+08	6.61762e+08	6.36581e+08	5.61707e+08	6.69921e+08	6.20365e+08	7.35701e+08	6.77595e+08	6.53739e+08	29.2877	29.7265	29.194	29.5279	29.5587	29.3196	29.682	29.7427	29.0863	29.159	29.0336	29.0084	29.3017	29.2458	29.0652	29.3194	29.2085	29.4545	29.3358	29.2841
Q6P5B0	RRP12_MOUSE	RRP12-like protein OS=Mus musculus GN=Rrp12 PE=1 SV=1	Rrp12 Kiaa0690	6.39772e+08	1.07602e+09	6.67662e+08	8.79713e+08	6.36705e+08	6.66554e+08	4.30592e+08	8.20339e+08	4.82866e+08	7.15119e+08	5.67212e+08	7.57997e+08	6.00407e+08	7.10589e+08	4.46349e+08	7.89836e+08	5.64995e+08	8.20451e+08	6.29091e+08	6.82839e+08	29.253	30.0031	29.3145	29.7125	29.246	29.3121	28.6817	29.6116	28.847	29.4136	29.0793	29.4976	29.1614	29.4044	28.7336	29.557	29.0737	29.6118	29.2287	29.347
Q9EPN1	NBEA_MOUSE	Neurobeachin OS=Mus musculus GN=Nbea PE=1 SV=1	Nbea Lyst2	7.53215e+08	6.67178e+08	7.79683e+08	8.29211e+08	7.24891e+08	6.5769e+08	5.0741e+08	5.09682e+08	6.68601e+08	5.94267e+08	6.12059e+08	8.22665e+08	7.0074e+08	7.71178e+08	6.53382e+08	7.64044e+08	7.77536e+08	5.25052e+08	6.17121e+08	6.3571e+08	29.4885	29.3135	29.5383	29.6272	29.4332	29.2928	28.9186	28.925	29.3166	29.1465	29.1891	29.6157	29.3843	29.5225	29.2834	29.5091	29.5343	28.9679	29.201	29.2438
Q922U2	K2C5_MOUSE	Keratin, type II cytoskeletal 5 OS=Mus musculus GN=Krt5 PE=1 SV=1	Krt5 Krt2-5	1.05629e+09	7.00184e+08	5.21586e+08	8.76439e+08	6.64964e+08	7.94271e+08	7.88579e+08	8.75958e+08	6.62744e+08	6.20436e+08	5.48186e+08	6.79291e+08	5.24924e+08	7.46576e+08	5.59178e+08	4.74753e+08	5.79338e+08	6.37414e+08	5.48525e+08	6.28845e+08	29.9764	29.3832	28.9583	29.7071	29.3087	29.5651	29.5547	29.7063	29.3039	29.2087	29.0301	29.3395	28.9675	29.4757	29.0587	28.8226	29.1098	29.2477	29.031	29.2281
Q9JM99	PRG4_MOUSE	Proteoglycan 4 OS=Mus musculus GN=Prg4 PE=1 SV=2	Prg4 Msf Szp	6.67915e+08	6.56412e+08	6.86982e+08	6.75193e+08	6.66831e+08	6.90397e+08	6.37733e+08	6.22747e+08	6.79919e+08	7.77258e+08	6.6003e+08	7.5472e+08	6.38966e+08	6.94012e+08	6.72075e+08	7.40937e+08	6.54086e+08	6.01012e+08	5.99691e+08	6.47991e+08	29.3151	29.29	29.3557	29.3307	29.3127	29.3629	29.2484	29.2141	29.3408	29.5338	29.298	29.4914	29.2512	29.3704	29.324	29.4648	29.2849	29.1628	29.1596	29.2714
Q8BM14	LIPK_MOUSE	Lipase member K OS=Mus musculus GN=Lipk PE=2 SV=1	Lipk Lipl2	1.05654e+09	1.4961e+08	1.48265e+09	6.7903e+08	5.84776e+08	3.7211e+08	3.1432e+08	4.16153e+08	6.26505e+08	1.28694e+08	8.3833e+08	1.2115e+09	6.79474e+08	1.1265e+09	1.15792e+09	8.26291e+08	5.85626e+08	8.12051e+07	9.2238e+08	1.68735e+08	29.9767	27.1566	30.4655	29.3389	29.1233	28.4712	28.2277	28.6325	29.2228	26.9394	29.6429	30.1742	29.3398	30.0692	30.1089	29.6221	29.1254	26.2751	29.7808	27.3302
Q6PDQ2	CHD4_MOUSE	Chromodomain-helicase-DNA-binding protein 4 OS=Mus musculus GN=Chd4 PE=1 SV=1	Chd4	4.26486e+08	1.37195e+09	5.00713e+08	5.74739e+08	3.78066e+08	5.10082e+08	5.44049e+08	5.60949e+08	4.65975e+08	4.51607e+08	5.53859e+08	4.65996e+08	4.19844e+08	5.92561e+08	5.59002e+08	1.37392e+09	4.61861e+08	1.84403e+09	6.893e+08	5.72056e+08	28.6679	30.3536	28.8994	29.0983	28.4941	28.9262	29.0192	29.0633	28.7957	28.7505	29.0449	28.7957	28.6453	29.1424	29.0583	30.3556	28.7829	30.7802	29.3606	29.0916
Q9JHG7	PK3CG_MOUSE	Phosphatidylinositol 4,5-bisphosphate 3-kinase catalytic subunit gamma isoform OS=Mus musculus GN=Pik3cg PE=1 SV=2	Pik3cg Pi3kg1	6.12726e+08	6.11372e+08	6.20709e+08	7.08827e+08	5.32395e+08	6.58724e+08	7.54682e+08	5.33822e+08	6.8142e+08	6.84123e+08	6.66976e+08	6.63734e+08	6.78873e+08	7.09565e+08	7.45087e+08	6.27165e+08	5.73478e+08	7.78151e+08	6.40204e+08	8.25015e+08	29.1907	29.1875	29.2093	29.4009	28.9879	29.2951	29.4913	28.9918	29.344	29.3497	29.3131	29.306	29.3386	29.4024	29.4728	29.2243	29.0952	29.5355	29.254	29.6198
Q91WG5	AAKG2_MOUSE	5'-AMP-activated protein kinase subunit gamma-2 OS=Mus musculus GN=Prkag2 PE=1 SV=2	Prkag2	6.83469e+08	5.66518e+08	6.71496e+08	5.21025e+08	1.00027e+09	5.89094e+08	1.41072e+09	1.35317e+09	3.59433e+08	3.80111e+08	4.1268e+08	3.74515e+08	5.66084e+08	6.2861e+08	5.60096e+08	5.74082e+08	5.19216e+08	9.43779e+08	6.86281e+08	5.03469e+08	29.3483	29.0775	29.3228	28.9568	29.8977	29.1339	30.3938	30.3337	28.4211	28.5018	28.6204	28.4804	29.0764	29.2276	29.0611	29.0967	28.9518	29.8139	29.3542	28.9073
P62702	RS4X_MOUSE	40S ribosomal protein S4, X isoform OS=Mus musculus GN=Rps4x PE=2 SV=2	Rps4x Rps4	4.75025e+08	5.00309e+08	4.05813e+08	4.4947e+08	6.26487e+08	6.22083e+08	6.73458e+08	7.30467e+08	6.28058e+08	6.96025e+08	6.20227e+08	5.93928e+08	5.60244e+08	5.37544e+08	4.91263e+08	5.25112e+08	1.0505e+09	1.10754e+09	9.8538e+08	1.00376e+09	28.8234	28.8982	28.5962	28.7436	29.2227	29.2125	29.327	29.4442	29.2263	29.3746	29.2082	29.1457	29.0615	29.0018	28.8719	28.9681	29.9684	30.0447	29.8761	29.9028
Q9QYJ0	DNJA2_MOUSE	DnaJ homolog subfamily A member 2 OS=Mus musculus GN=Dnaja2 PE=1 SV=1	Dnaja2	4.90396e+08	7.14668e+08	5.56903e+08	7.22888e+08	7.6967e+08	7.72744e+08	7.56006e+08	4.56059e+08	8.27989e+08	8.83646e+08	7.12219e+08	4.63643e+08	5.84889e+08	6.19165e+08	5.88897e+08	6.71234e+08	6.11956e+08	7.09654e+08	4.97246e+08	8.35909e+08	28.8694	29.4127	29.0528	29.4292	29.5197	29.5254	29.4938	28.7646	29.625	29.7189	29.4077	28.7884	29.1236	29.2057	29.1334	29.3222	29.1889	29.4025	28.8894	29.6388
Q5DW34	EHMT1_MOUSE	Histone-lysine N-methyltransferase EHMT1 OS=Mus musculus GN=Ehmt1 PE=1 SV=2	Ehmt1 Euhmtase1 Glp Kmt1d	7.19715e+08	8.95625e+08	6.64661e+08	6.6826e+08	6.47521e+08	6.34361e+08	5.20201e+08	7.65512e+08	5.64447e+08	7.08509e+08	5.58549e+08	6.3325e+08	5.91258e+08	6.41026e+08	5.39873e+08	6.87907e+08	6.33589e+08	7.98017e+08	5.88334e+08	7.83846e+08	29.4229	29.7383	29.308	29.3158	29.2704	29.2407	28.9545	29.5118	29.0723	29.4002	29.0571	29.2382	29.1392	29.2558	29.008	29.3576	29.239	29.5718	29.1321	29.546
Q6PE54	DHX40_MOUSE	Probable ATP-dependent RNA helicase DHX40 OS=Mus musculus GN=Dhx40 PE=2 SV=1	Dhx40	6.31222e+08	6.89765e+08	6.03682e+08	6.14459e+08	5.86347e+08	6.32744e+08	6.43723e+08	5.8425e+08	6.97603e+08	7.1247e+08	6.47153e+08	6.44427e+08	7.12356e+08	7.22351e+08	7.2553e+08	6.81099e+08	6.34282e+08	6.87767e+08	6.14835e+08	7.23661e+08	29.2336	29.3615	29.1692	29.1947	29.1272	29.237	29.2619	29.122	29.3778	29.4083	29.2695	29.2634	29.408	29.4281	29.4345	29.3433	29.2405	29.3573	29.1956	29.4307
Q9JI78	NGLY1_MOUSE	Peptide-N(4)-(N-acetyl-beta-glucosaminyl)asparagine amidase OS=Mus musculus GN=Ngly1 PE=1 SV=2	Ngly1	6.89352e+08	7.38787e+08	6.6838e+08	5.77185e+08	7.60697e+08	8.69157e+08	7.10402e+08	1.05566e+09	5.12613e+08	5.59884e+08	5.21679e+08	5.12039e+08	6.29493e+08	4.66947e+08	5.35701e+08	6.03127e+08	7.14961e+08	7.49423e+08	4.99198e+08	7.72016e+08	29.3607	29.4606	29.3161	29.1045	29.5027	29.695	29.4041	29.9755	28.9333	29.0606	28.9586	28.9317	29.2296	28.7987	28.9969	29.1679	29.4133	29.4812	28.895	29.5241
P09470	ACE_MOUSE	Angiotensin-converting enzyme OS=Mus musculus GN=Ace PE=1 SV=3	Ace Dcp1	7.90789e+08	6.82831e+08	7.74217e+08	6.80071e+08	6.7845e+08	7.00718e+08	6.02058e+08	6.01519e+08	7.03706e+08	5.85782e+08	6.47333e+08	7.28417e+08	7.40387e+08	6.82449e+08	6.74042e+08	6.71994e+08	6.36634e+08	4.77955e+08	5.64618e+08	5.22484e+08	29.5587	29.347	29.5282	29.3411	29.3377	29.3843	29.1653	29.164	29.3904	29.1258	29.2699	29.4402	29.4637	29.3461	29.3283	29.3239	29.2459	28.8323	29.0727	28.9608
P07310	KCRM_MOUSE	Creatine kinase M-type OS=Mus musculus GN=Ckm PE=1 SV=1	Ckm Ckmm	6.85907e+08	5.9292e+08	7.02801e+08	6.40496e+08	6.04074e+08	6.59629e+08	6.56384e+08	6.09943e+08	6.731e+08	6.27827e+08	6.45892e+08	6.79704e+08	7.18547e+08	7.21012e+08	7.18163e+08	6.92299e+08	5.99923e+08	6.43651e+08	6.23545e+08	6.50623e+08	29.3534	29.1433	29.3885	29.2546	29.1702	29.2971	29.29	29.1841	29.3262	29.2258	29.2667	29.3403	29.4205	29.4254	29.4197	29.3668	29.1602	29.2617	29.2159	29.2772
Q8BH64	EHD2_MOUSE	EH domain-containing protein 2 OS=Mus musculus GN=Ehd2 PE=1 SV=1	Ehd2	5.57905e+08	6.73651e+08	5.22999e+08	6.16804e+08	7.26912e+08	7.01225e+08	6.95081e+08	6.92197e+08	6.80887e+08	7.58593e+08	7.20253e+08	6.44809e+08	5.50833e+08	5.50113e+08	5.13096e+08	5.27717e+08	7.55564e+08	7.22528e+08	7.39601e+08	7.62536e+08	29.0554	29.3274	28.9622	29.2002	29.4372	29.3853	29.3726	29.3666	29.3428	29.4988	29.4239	29.2643	29.037	29.0352	28.9347	28.9752	29.493	29.4285	29.4622	29.5062
Q9DCT8	CRIP2_MOUSE	Cysteine-rich protein 2 OS=Mus musculus GN=Crip2 PE=1 SV=1	Crip2 Crp2 Hlp	6.33831e+08	8.23161e+08	8.61174e+08	7.07603e+08	8.11398e+08	6.58435e+08	4.2539e+08	5.67809e+08	5.8429e+08	6.89516e+08	7.46436e+08	6.31898e+08	5.342e+08	6.35186e+08	5.42992e+08	5.92856e+08	6.8072e+08	7.70639e+08	7.11176e+08	5.04331e+08	29.2395	29.6166	29.6817	29.3984	29.5958	29.2945	28.6642	29.0808	29.1221	29.361	29.4754	29.2351	28.9928	29.2426	29.0164	29.1431	29.3425	29.5215	29.4056	28.9098
P30999	CTND1_MOUSE	Catenin delta-1 OS=Mus musculus GN=Ctnnd1 PE=1 SV=2	Ctnnd1 Catns Kiaa0384	6.45089e+08	4.87613e+08	6.85512e+08	6.22755e+08	7.58991e+08	7.37524e+08	6.3614e+08	7.27339e+08	7.02914e+08	7.04442e+08	6.43848e+08	7.21902e+08	5.13387e+08	7.64813e+08	5.45946e+08	6.77587e+08	5.16583e+08	7.24544e+08	5.97472e+08	6.67336e+08	29.2649	28.8612	29.3526	29.2141	29.4995	29.4581	29.2448	29.4381	29.3888	29.3919	29.2621	29.4272	28.9355	29.5105	29.0242	29.3358	28.9444	29.4325	29.1543	29.3138
Q64727	VINC_MOUSE	Vinculin OS=Mus musculus GN=Vcl PE=1 SV=4	Vcl	6.28301e+08	5.77042e+08	6.61591e+08	5.92018e+08	7.54674e+08	6.80966e+08	7.56792e+08	6.00871e+08	6.4774e+08	6.839e+08	6.34916e+08	6.18307e+08	6.11478e+08	7.02838e+08	7.23371e+08	6.69113e+08	6.77893e+08	6.06954e+08	6.56491e+08	5.86934e+08	29.2269	29.1041	29.3014	29.1411	29.4913	29.343	29.4953	29.1625	29.2708	29.3492	29.242	29.2037	29.1877	29.3886	29.4302	29.3177	29.3365	29.177	29.2902	29.1286
Q3TXS7	PSMD1_MOUSE	26S proteasome non-ATPase regulatory subunit 1 OS=Mus musculus GN=Psmd1 PE=1 SV=1	Psmd1	7.49331e+08	5.48539e+08	7.32555e+08	6.57773e+08	5.03781e+08	6.10249e+08	6.15957e+08	5.10863e+08	6.65447e+08	6.81686e+08	6.4685e+08	7.46428e+08	7.21287e+08	7.24325e+08	7.29068e+08	6.81007e+08	6.70416e+08	5.99779e+08	6.46318e+08	6.22144e+08	29.481	29.031	29.4484	29.293	28.9082	29.1848	29.1983	28.9284	29.3097	29.3445	29.2689	29.4754	29.426	29.4321	29.4415	29.3431	29.3205	29.1599	29.2677	29.2127
Q9EQH3	VPS35_MOUSE	Vacuolar protein sorting-associated protein 35 OS=Mus musculus GN=Vps35 PE=1 SV=1	Vps35 Mem3	6.30989e+08	7.28972e+08	6.67842e+08	6.33481e+08	5.90222e+08	6.65101e+08	6.17827e+08	6.03579e+08	6.61537e+08	6.876e+08	6.10836e+08	6.33896e+08	6.87266e+08	6.68198e+08	6.55855e+08	6.88733e+08	6.31791e+08	6.7693e+08	5.86888e+08	6.83086e+08	29.233	29.4413	29.3149	29.2387	29.1367	29.309	29.2026	29.169	29.3012	29.357	29.1862	29.2397	29.3563	29.3157	29.2888	29.3594	29.2349	29.3344	29.1285	29.3475
P61164	ACTZ_MOUSE	Alpha-centractin OS=Mus musculus GN=Actr1a PE=2 SV=1	Actr1a Ctrn1	7.31338e+08	6.71748e+08	7.21374e+08	6.04562e+08	6.56551e+08	6.37836e+08	6.73577e+08	6.34939e+08	7.34565e+08	5.7427e+08	6.89313e+08	6.40698e+08	6.30839e+08	7.42645e+08	7.97578e+08	6.81243e+08	6.46096e+08	4.62288e+08	5.19052e+08	5.12525e+08	29.446	29.3233	29.4262	29.1713	29.2903	29.2486	29.3273	29.242	29.4523	29.0972	29.3606	29.2551	29.2327	29.4681	29.571	29.3436	29.2672	28.7842	28.9513	28.933
Q80TS3	LPHN3_MOUSE	Latrophilin-3 OS=Mus musculus GN=Lphn3 PE=1 SV=3	Adgrl3 Kiaa0768 Lec3 Lphn3	7.7855e+08	6.32256e+08	7.54465e+08	6.97046e+08	6.63363e+08	6.55059e+08	6.25343e+08	6.86199e+08	6.81737e+08	6.21634e+08	6.25329e+08	6.47238e+08	7.0606e+08	6.92278e+08	6.34797e+08	6.51147e+08	6.2657e+08	4.15835e+08	6.14336e+08	5.5077e+08	29.5362	29.2359	29.4909	29.3767	29.3052	29.2871	29.2201	29.3541	29.3446	29.2115	29.22	29.2697	29.3952	29.3668	29.2417	29.2784	29.2229	28.6314	29.1945	29.0369
P17809	GTR1_MOUSE	Solute carrier family 2, facilitated glucose transporter member 1 OS=Mus musculus GN=Slc2a1 PE=1 SV=4	Slc2a1 Glut1	4.98538e+08	5.36122e+08	3.58256e+08	5.11218e+08	6.09236e+08	4.98992e+08	5.76365e+08	6.25928e+08	7.62435e+08	8.37104e+08	8.17197e+08	7.00956e+08	6.61283e+08	5.92832e+08	5.93674e+08	5.45179e+08	7.61448e+08	7.32952e+08	8.19452e+08	8.34661e+08	28.8931	28.998	28.4164	28.9294	29.1824	28.8944	29.1024	29.2214	29.506	29.6408	29.6061	29.3847	29.3007	29.143	29.1451	29.0222	29.5042	29.4491	29.6101	29.6366
Q8VED5	K2C79_MOUSE	Keratin, type II cytoskeletal 79 OS=Mus musculus GN=Krt79 PE=1 SV=2	Krt79 Kb38	6.44209e+08	6.41249e+08	6.17463e+08	6.25021e+08	5.1408e+08	5.51484e+08	6.38639e+08	4.56676e+08	6.79271e+08	6.07826e+08	6.41291e+08	6.47941e+08	6.54754e+08	6.38472e+08	7.11181e+08	7.28519e+08	6.03798e+08	6.75225e+08	6.21088e+08	7.65038e+08	29.263	29.2563	29.2018	29.2193	28.9374	29.0387	29.2504	28.7666	29.3394	29.1791	29.2564	29.2713	29.2864	29.25	29.4056	29.4404	29.1695	29.3308	29.2102	29.511
P30416	FKBP4_MOUSE	Peptidyl-prolyl cis-trans isomerase FKBP4 OS=Mus musculus GN=Fkbp4 PE=1 SV=5	Fkbp4 Fkpb52	6.19804e+08	6.38222e+08	6.41888e+08	6.21521e+08	5.87181e+08	6.51136e+08	6.65619e+08	5.71453e+08	6.4534e+08	6.44936e+08	6.53772e+08	6.19251e+08	6.23771e+08	6.65033e+08	7.01937e+08	6.31403e+08	5.56335e+08	6.57633e+08	5.84564e+08	6.61599e+08	29.2072	29.2495	29.2577	29.2112	29.1292	29.2784	29.3101	29.0901	29.2655	29.2646	29.2842	29.2059	29.2164	29.3088	29.3868	29.234	29.0514	29.2927	29.1228	29.3014
O08810	U5S1_MOUSE	116 kDa U5 small nuclear ribonucleoprotein component OS=Mus musculus GN=Eftud2 PE=2 SV=1	Eftud2 Snrp116	7.00939e+08	9.52599e+08	5.8785e+08	7.44205e+08	4.91126e+08	4.89697e+08	5.18832e+08	5.96574e+08	5.23004e+08	6.33949e+08	7.0401e+08	5.96961e+08	7.83551e+08	5.69312e+08	5.63981e+08	5.44498e+08	6.63006e+08	6.62114e+08	6.61112e+08	6.39863e+08	29.3847	29.8273	29.1309	29.4711	28.8715	28.8673	28.9507	29.1521	28.9622	29.2398	29.391	29.1531	29.5455	29.0846	29.0711	29.0204	29.3044	29.3025	29.3003	29.2532
Q02257	PLAK_MOUSE	Junction plakoglobin OS=Mus musculus GN=Jup PE=1 SV=3	Jup	7.08934e+08	4.66829e+08	6.42201e+08	6.86034e+08	5.96317e+08	6.234e+08	6.09753e+08	6.34342e+08	6.52219e+08	5.93156e+08	6.75685e+08	7.12046e+08	5.5861e+08	6.96049e+08	6.18217e+08	6.2633e+08	6.25484e+08	5.26859e+08	7.05848e+08	6.37231e+08	29.4011	28.7983	29.2585	29.3537	29.1515	29.2156	29.1836	29.2407	29.2808	29.1438	29.3318	29.4074	29.0573	29.3746	29.2035	29.2223	29.2204	28.9728	29.3948	29.2472
A2A8L5	PTPRF_MOUSE	Receptor-type tyrosine-protein phosphatase F OS=Mus musculus GN=Ptprf PE=1 SV=1	Ptprf Lar	7.15932e+08	6.03491e+08	7.83245e+08	6.97058e+08	5.88872e+08	5.85219e+08	6.3417e+08	5.36107e+08	5.73028e+08	5.12622e+08	7.00178e+08	6.2995e+08	6.8415e+08	6.68752e+08	7.53535e+08	6.11933e+08	6.16016e+08	5.01295e+08	6.00621e+08	5.695e+08	29.4152	29.1688	29.5449	29.3767	29.1334	29.1244	29.2403	28.9979	29.094	28.9333	29.3831	29.2307	29.3497	29.3169	29.4891	29.1888	29.1984	28.9011	29.1619	29.0851
Q11011	PSA_MOUSE	Puromycin-sensitive aminopeptidase OS=Mus musculus GN=Npepps PE=1 SV=2	Npepps Psa	5.7648e+08	6.20301e+08	6.01186e+08	6.39982e+08	5.39727e+08	5.72164e+08	6.58032e+08	5.89411e+08	5.53581e+08	6.14816e+08	6.75302e+08	5.43597e+08	5.87351e+08	6.35495e+08	9.93207e+08	6.38961e+08	5.31791e+08	7.19691e+08	6.63676e+08	6.09035e+08	29.1027	29.2084	29.1632	29.2535	29.0077	29.0919	29.2936	29.1347	29.0442	29.1956	29.331	29.018	29.1296	29.2433	29.8875	29.2512	28.9863	29.4228	29.3059	29.182
Q8K212	PACS1_MOUSE	Phosphofurin acidic cluster sorting protein 1 OS=Mus musculus GN=Pacs1 PE=1 SV=2	Pacs1	6.44729e+08	6.67415e+08	6.56622e+08	6.50037e+08	6.12796e+08	6.29556e+08	6.49237e+08	5.27969e+08	6.82704e+08	6.15924e+08	6.98857e+08	5.90588e+08	6.17414e+08	6.29515e+08	7.59394e+08	5.96808e+08	6.00233e+08	5.52219e+08	5.79922e+08	5.67932e+08	29.2641	29.314	29.2905	29.2759	29.1908	29.2298	29.2742	28.9759	29.3467	29.1982	29.3804	29.1376	29.2017	29.2297	29.5003	29.1527	29.1609	29.0407	29.1113	29.0811
Q9D0R2	SYTC_MOUSE	Threonine--tRNA ligase, cytoplasmic OS=Mus musculus GN=Tars PE=1 SV=2	Tars1 Tars	6.16408e+08	6.01165e+08	6.67187e+08	6.06318e+08	5.87623e+08	6.38872e+08	5.65225e+08	5.57907e+08	6.18688e+08	6.19243e+08	6.60583e+08	6.19342e+08	6.54702e+08	6.71691e+08	7.26728e+08	6.51293e+08	6.41242e+08	6.10268e+08	6.1938e+08	5.81313e+08	29.1993	29.1632	29.3135	29.1755	29.1303	29.251	29.0742	29.0554	29.2046	29.2059	29.2992	29.2062	29.2863	29.3232	29.4368	29.2787	29.2563	29.1849	29.2063	29.1147
Q6X893	CTL1_MOUSE	Choline transporter-like protein 1 OS=Mus musculus GN=Slc44a1 PE=1 SV=3	Slc44a1 Cd92 Cdw92 Ctl1	5.53706e+08	5.60886e+08	5.69296e+08	5.53171e+08	6.24878e+08	6.34575e+08	6.47542e+08	6.17736e+08	6.40083e+08	6.46996e+08	6.12541e+08	6.82478e+08	6.35005e+08	6.32009e+08	5.98452e+08	6.20148e+08	6.89295e+08	6.3126e+08	6.43502e+08	6.79235e+08	29.0445	29.0631	29.0846	29.0432	29.219	29.2412	29.2704	29.2024	29.2537	29.2692	29.1902	29.3462	29.2422	29.2354	29.1567	29.208	29.3605	29.2337	29.2614	29.3393
Q91XV3	BASP1_MOUSE	Brain acid soluble protein 1 OS=Mus musculus GN=Basp1 PE=1 SV=3	Basp1 Nap22	5.86338e+08	6.82032e+08	5.56175e+08	6.07077e+08	6.90249e+08	6.84408e+08	6.82564e+08	6.77047e+08	5.61847e+08	6.99986e+08	5.36361e+08	6.90824e+08	5.6575e+08	5.83347e+08	5.60176e+08	5.38467e+08	6.19691e+08	6.77964e+08	5.82359e+08	6.87857e+08	29.1272	29.3453	29.051	29.1773	29.3625	29.3503	29.3464	29.3347	29.0656	29.3828	28.9986	29.3637	29.0756	29.1198	29.0613	29.0043	29.207	29.3366	29.1173	29.3575
P97351	RS3A_MOUSE	40S ribosomal protein S3a OS=Mus musculus GN=Rps3a PE=1 SV=3	Rps3a Rps3a1	5.44984e+08	5.67232e+08	5.67331e+08	5.61248e+08	6.18585e+08	6.74577e+08	7.92296e+08	6.16899e+08	5.70757e+08	6.00048e+08	6.19804e+08	5.8587e+08	5.3208e+08	6.07611e+08	6.61305e+08	5.88631e+08	5.98194e+08	7.16733e+08	7.03553e+08	7.1937e+08	29.0216	29.0794	29.0796	29.0641	29.2044	29.3294	29.5615	29.2005	29.0883	29.1605	29.2072	29.126	28.9871	29.1786	29.3007	29.1328	29.156	29.4169	29.3901	29.4222
Q9D8E6	RL4_MOUSE	60S ribosomal protein L4 OS=Mus musculus GN=Rpl4 PE=1 SV=3	Rpl4	4.20474e+08	4.40471e+08	3.96531e+08	4.29392e+08	5.96314e+08	5.38349e+08	5.00851e+08	7.31348e+08	6.60275e+08	6.18694e+08	6.3526e+08	6.35333e+08	5.84297e+08	5.56449e+08	4.93101e+08	5.59706e+08	1.03466e+09	7.32082e+08	9.68354e+08	8.69149e+08	28.6474	28.7145	28.5629	28.6777	29.1515	29.004	28.8998	29.446	29.2985	29.2047	29.2428	29.2429	29.1221	29.0517	28.8773	29.0601	29.9465	29.4474	29.851	29.695
Q91X52	DCXR_MOUSE	L-xylulose reductase OS=Mus musculus GN=Dcxr PE=2 SV=2	Dcxr	5.70591e+08	6.87487e+08	6.1894e+08	6.21435e+08	6.1112e+08	5.87758e+08	6.35758e+08	5.95217e+08	6.49284e+08	6.3092e+08	6.24796e+08	6.15956e+08	5.90218e+08	5.96504e+08	6.33915e+08	6.70748e+08	5.69758e+08	6.63254e+08	5.43407e+08	6.50199e+08	29.0879	29.3568	29.2052	29.211	29.1869	29.1306	29.2439	29.1488	29.2743	29.2329	29.2188	29.1983	29.1367	29.152	29.2397	29.3212	29.0858	29.305	29.0175	29.2763
Q9QUJ7	ACSL4_MOUSE	Long-chain-fatty-acid--CoA ligase 4 OS=Mus musculus GN=Acsl4 PE=2 SV=2	Acsl4 Acs4 Facl4	5.35877e+08	1.07727e+09	6.01122e+08	5.40612e+08	7.15675e+08	6.91484e+08	5.98338e+08	6.11115e+08	5.97171e+08	7.29855e+08	5.19613e+08	5.26657e+08	5.69707e+08	5.61485e+08	5.11554e+08	6.19597e+08	5.87108e+08	5.51511e+08	4.90197e+08	6.99601e+08	28.9973	30.0047	29.1631	29.01	29.4147	29.3651	29.1564	29.1869	29.1536	29.443	28.9529	28.9723	29.0856	29.0647	28.9303	29.2068	29.1291	29.0388	28.8688	29.382
Q9Z1T2	TSP4_MOUSE	Thrombospondin-4 OS=Mus musculus GN=Thbs4 PE=1 SV=1	Thbs4 Tsp4	6.34904e+08	6.25354e+08	6.25149e+08	5.58719e+08	5.99671e+08	6.38584e+08	6.27799e+08	5.44644e+08	5.83519e+08	6.49213e+08	5.92971e+08	6.27116e+08	6.2924e+08	6.51483e+08	6.45549e+08	6.75211e+08	5.52346e+08	6.56744e+08	4.96047e+08	6.08954e+08	29.242	29.2201	29.2196	29.0575	29.1596	29.2503	29.2257	29.0207	29.1202	29.2741	29.1434	29.2242	29.229	29.2792	29.266	29.3308	29.041	29.2908	28.8859	29.1818
Q9D787	PPIL2_MOUSE	Peptidyl-prolyl cis-trans isomerase-like 2 OS=Mus musculus GN=Ppil2 PE=2 SV=2	Ppil2	5.7411e+08	5.34896e+08	5.98349e+08	5.70476e+08	5.61341e+08	6.39689e+08	5.54012e+08	5.35271e+08	6.64127e+08	6.50017e+08	6.77017e+08	5.73994e+08	6.61099e+08	6.77349e+08	6.88566e+08	6.34673e+08	5.62696e+08	6.47177e+08	5.91383e+08	6.05878e+08	29.0968	28.9947	29.1564	29.0876	29.0643	29.2528	29.0453	28.9957	29.3069	29.2759	29.3346	29.0965	29.3003	29.3353	29.359	29.2414	29.0678	29.2696	29.1395	29.1745
Q7TPZ8	CBPA1_MOUSE	Carboxypeptidase A1 OS=Mus musculus GN=Cpa1 PE=2 SV=1	Cpa1	7.53293e+08	5.22582e+08	7.08772e+08	6.873e+08	7.04828e+08	5.42384e+08	6.50372e+08	6.08961e+08	6.92097e+08	4.93342e+08	8.01864e+08	7.01218e+08	6.59018e+08	5.57536e+08	6.07365e+08	5.82389e+08	6.44898e+08	3.26483e+08	5.22996e+08	4.21956e+08	29.4886	28.9611	29.4007	29.3564	29.3927	29.0147	29.2767	29.1818	29.3664	28.878	29.5788	29.3853	29.2957	29.0545	29.178	29.1174	29.2645	28.2824	28.9622	28.6525
P21981	TGM2_MOUSE	Protein-glutamine gamma-glutamyltransferase 2 OS=Mus musculus GN=Tgm2 PE=1 SV=4	Tgm2	6.68381e+08	6.49818e+08	6.28467e+08	5.83821e+08	5.98444e+08	5.93707e+08	6.69478e+08	7.41309e+08	6.10317e+08	6.43575e+08	5.74191e+08	7.02541e+08	5.97422e+08	5.00904e+08	5.80519e+08	5.99993e+08	5.23843e+08	5.64714e+08	5.06622e+08	5.98098e+08	29.3161	29.2755	29.2273	29.121	29.1566	29.1452	29.3185	29.4655	29.185	29.2615	29.097	29.388	29.1542	28.9	29.1128	29.1604	28.9646	29.0729	28.9163	29.1558
Q8BK67	RCC2_MOUSE	Protein RCC2 OS=Mus musculus GN=Rcc2 PE=2 SV=1	Rcc2 Kiaa1470	7.39605e+08	6.85806e+08	5.7196e+08	4.61169e+08	5.83903e+08	5.69743e+08	4.13986e+08	8.19375e+08	6.21195e+08	6.51177e+08	4.58309e+08	7.28672e+08	4.69549e+08	5.76941e+08	4.22837e+08	6.95763e+08	6.02089e+08	7.37644e+08	4.57517e+08	8.3189e+08	29.4622	29.3532	29.0913	28.7807	29.1212	29.0857	28.625	29.6099	29.2105	29.2785	28.7717	29.4407	28.8067	29.1038	28.6555	29.374	29.1654	29.4583	28.7693	29.6318
P63005	LIS1_MOUSE	Platelet-activating factor acetylhydrolase IB subunit alpha OS=Mus musculus GN=Pafah1b1 PE=1 SV=2	Pafah1b1 Lis-1 Lis1 Pafaha	5.82108e+08	7.79881e+08	5.94045e+08	5.93721e+08	7.13432e+08	6.06596e+08	4.55081e+08	5.98439e+08	5.40378e+08	5.92571e+08	5.86826e+08	5.50741e+08	5.2413e+08	5.87287e+08	4.6875e+08	6.23977e+08	6.84453e+08	6.7355e+08	6.48025e+08	6.86096e+08	29.1167	29.5387	29.146	29.1452	29.4102	29.1762	28.7615	29.1566	29.0094	29.1424	29.1284	29.0368	28.9653	29.1295	28.8042	29.2169	29.3504	29.3272	29.2715	29.3538
Q3U0V1	FUBP2_MOUSE	Far upstream element-binding protein 2 OS=Mus musculus GN=Khsrp PE=1 SV=2	Khsrp Fubp2	7.87284e+08	2.15498e+08	8.98252e+08	6.09966e+08	5.4542e+08	5.65955e+08	4.50858e+08	7.05543e+08	5.97463e+08	3.78641e+08	5.27909e+08	9.93253e+08	5.52576e+08	7.24799e+08	7.44157e+08	8.19246e+08	6.3447e+08	2.91507e+08	6.44625e+08	4.00541e+08	29.5523	27.6831	29.7425	29.1842	29.0228	29.0761	28.7481	29.3942	29.1543	28.4963	28.9757	29.8876	29.0416	29.433	29.471	29.6097	29.241	28.119	29.2639	28.5774
Q8CG76	ARK72_MOUSE	Aflatoxin B1 aldehyde reductase member 2 OS=Mus musculus GN=Akr7a2 PE=1 SV=3	Akr7a2 Afar Akr7a5	6.10594e+08	5.51205e+08	6.92993e+08	5.59358e+08	5.11991e+08	6.05479e+08	5.11671e+08	5.10011e+08	6.33401e+08	5.67882e+08	6.5279e+08	7.01193e+08	6.77037e+08	6.90534e+08	7.54086e+08	6.38233e+08	6.73287e+08	4.45601e+08	5.72498e+08	5.24519e+08	29.1856	29.038	29.3683	29.0592	28.9315	29.1735	28.9306	28.926	29.2385	29.081	29.282	29.3852	29.3347	29.3631	29.4902	29.2495	29.3266	28.7312	29.0927	28.9664
P06684	CO5_MOUSE	Complement C5 OS=Mus musculus GN=C5 PE=1 SV=2	C5 Hc	6.31439e+08	6.97841e+08	6.33629e+08	5.97919e+08	5.36137e+08	5.81134e+08	5.51636e+08	5.48385e+08	5.86599e+08	6.15109e+08	6.22139e+08	5.58932e+08	6.35174e+08	6.21216e+08	6.10128e+08	6.96484e+08	5.67607e+08	6.389e+08	5.36233e+08	6.15247e+08	29.2341	29.3783	29.2391	29.1554	28.998	29.1143	29.0391	29.0306	29.1278	29.1963	29.2127	29.0581	29.2426	29.2105	29.1845	29.3755	29.0803	29.251	28.9983	29.1966
Q9Z1Z0	USO1_MOUSE	General vesicular transport factor p115 OS=Mus musculus GN=Uso1 PE=1 SV=2	Uso1 Vdp	6.43581e+08	5.39092e+08	7.34973e+08	6.32867e+08	4.98751e+08	5.96209e+08	5.99445e+08	5.26296e+08	5.67788e+08	5.49396e+08	5.81698e+08	6.39012e+08	5.89921e+08	6.58244e+08	7.65448e+08	6.32658e+08	4.97691e+08	6.4e+08	5.69054e+08	6.18534e+08	29.2615	29.006	29.4531	29.2373	28.8937	29.1512	29.1591	28.9713	29.0808	29.0333	29.1157	29.2513	29.1359	29.294	29.5117	29.2369	28.8907	29.2535	29.084	29.2043
Q9D8W5	PSD12_MOUSE	26S proteasome non-ATPase regulatory subunit 12 OS=Mus musculus GN=Psmd12 PE=1 SV=4	Psmd12	5.26072e+08	4.3996e+08	6.2742e+08	6.18104e+08	4.85924e+08	5.60429e+08	5.8004e+08	4.55927e+08	6.27211e+08	5.73449e+08	7.57985e+08	6.2608e+08	6.38462e+08	7.48947e+08	8.3688e+08	6.1561e+08	4.75053e+08	5.64919e+08	6.62022e+08	6.09518e+08	28.9707	28.7128	29.2249	29.2033	28.8562	29.062	29.1116	28.7642	29.2244	29.0951	29.4976	29.2218	29.25	29.4803	29.6404	29.1974	28.8235	29.0735	29.3023	29.1831
Q9ERK4	XPO2_MOUSE	Exportin-2 OS=Mus musculus GN=Cse1l PE=2 SV=1	Cse1l Xpo2	6.18971e+08	5.3302e+08	6.14052e+08	5.5347e+08	5.71797e+08	5.57505e+08	5.62025e+08	5.49139e+08	6.486e+08	5.33198e+08	6.37495e+08	6.22155e+08	6.88158e+08	6.60728e+08	7.01769e+08	6.73741e+08	6.57797e+08	4.80889e+08	5.73428e+08	5.44757e+08	29.2053	28.9896	29.1938	29.0439	29.0909	29.0544	29.0661	29.0326	29.2728	28.9901	29.2478	29.2127	29.3582	29.2995	29.3864	29.3276	29.2931	28.8411	29.095	29.021
O08796	EF2K_MOUSE	Eukaryotic elongation factor 2 kinase OS=Mus musculus GN=Eef2k PE=1 SV=1	Eef2k	7.19371e+08	4.6054e+08	7.75325e+08	5.70673e+08	4.8658e+08	4.97523e+08	3.52436e+08	4.50769e+08	7.11933e+08	5.22711e+08	6.4511e+08	7.09516e+08	7.45283e+08	7.44289e+08	5.32976e+08	6.93381e+08	7.63824e+08	3.8727e+08	5.97863e+08	5.88875e+08	29.4222	28.7788	29.5302	29.0881	28.8581	28.8902	28.3928	28.7478	29.4072	28.9614	29.265	29.4023	29.4732	29.4713	28.9895	29.3691	29.5087	28.5288	29.1552	29.1334
Q62073	M3K7_MOUSE	Mitogen-activated protein kinase kinase kinase 7 OS=Mus musculus GN=Map3k7 PE=1 SV=1	Map3k7 Tak1	6.58082e+08	6.10116e+08	7.14511e+08	5.87731e+08	5.48471e+08	5.91352e+08	5.23371e+08	5.13752e+08	5.53951e+08	6.00804e+08	5.52783e+08	6.57286e+08	5.66782e+08	6.61709e+08	6.20201e+08	6.19713e+08	5.94858e+08	5.31303e+08	5.7778e+08	5.55786e+08	29.2937	29.1845	29.4124	29.1306	29.0308	29.1394	28.9633	28.9365	29.0452	29.1623	29.0421	29.2919	29.0782	29.3016	29.2082	29.207	29.148	28.985	29.1059	29.05
P0DP30	CALM_MOUSE	Calmodulin OS=Mus musculus GN=Calm1 PE=1 SV=2	Calm2 Cam2 Camb CaMII	5.37068e+08	5.77702e+08	4.58657e+08	5.43629e+08	5.7325e+08	6.01668e+08	6.0756e+08	6.6098e+08	5.85452e+08	6.48228e+08	6.07038e+08	5.63467e+08	5.58628e+08	5.04321e+08	5.16254e+08	4.93655e+08	6.42852e+08	6.66338e+08	7.84041e+08	7.08564e+08	29.0005	29.1057	28.7728	29.018	29.0946	29.1644	29.1785	29.3	29.125	29.2719	29.1772	29.0698	29.0573	28.9098	28.9435	28.8789	29.2599	29.3117	29.5464	29.4003
Q91XI1	DUS3L_MOUSE	tRNA-dihydrouridine(47) synthase [NAD(P)(+)]-like OS=Mus musculus GN=Dus3l PE=2 SV=1	Dus3l	4.04902e+08	3.81333e+08	4.05291e+08	4.15495e+08	3.44913e+08	3.8783e+08	4.56053e+08	3.68099e+08	3.6738e+08	3.93118e+08	5.06947e+08	4.93857e+08	7.51679e+08	8.19069e+08	9.40698e+08	7.62863e+08	1.26917e+09	7.12186e+08	9.39954e+08	7.17885e+08	28.593	28.5065	28.5944	28.6303	28.3617	28.5308	28.7646	28.4555	28.4527	28.5504	28.9173	28.8795	29.4855	29.6094	29.8092	29.5068	30.2412	29.4077	29.808	29.4192
P08032	SPTA1_MOUSE	Spectrin alpha chain, erythrocytic 1 OS=Mus musculus GN=Spta1 PE=2 SV=3	Spta1 Spna1 Spta	6.0566e+08	4.91634e+08	6.64132e+08	6.03412e+08	5.29499e+08	5.83668e+08	5.3938e+08	5.6104e+08	5.54758e+08	5.75232e+08	5.59178e+08	6.78393e+08	5.90951e+08	6.36071e+08	6.5054e+08	7.22587e+08	5.15833e+08	5.79207e+08	5.96053e+08	5.14798e+08	29.1739	28.873	29.3069	29.1686	28.9801	29.1206	29.0067	29.0635	29.0473	29.0996	29.0587	29.3375	29.1385	29.2446	29.2771	29.4286	28.9423	29.1095	29.1509	28.9394
O35857	TIM44_MOUSE	Mitochondrial import inner membrane translocase subunit TIM44 OS=Mus musculus GN=Timm44 PE=2 SV=2	Timm44 Mimt44 Tim44	5.58651e+08	5.8041e+08	5.52488e+08	5.80345e+08	5.42458e+08	5.80378e+08	6.16683e+08	5.18854e+08	5.89088e+08	6.25904e+08	6.38378e+08	5.78118e+08	5.93203e+08	5.56942e+08	6.19087e+08	5.59926e+08	5.93757e+08	6.17126e+08	5.69679e+08	6.5002e+08	29.0574	29.1125	29.0414	29.1123	29.0149	29.1124	29.2	28.9508	29.1339	29.2214	29.2498	29.1068	29.1439	29.053	29.2056	29.0607	29.1453	29.201	29.0856	29.2759
P14869	RLA0_MOUSE	60S acidic ribosomal protein P0 OS=Mus musculus GN=Rplp0 PE=1 SV=3	Rplp0 Arbp	5.98425e+08	4.84228e+08	5.98381e+08	5.58082e+08	5.62627e+08	5.9162e+08	5.53598e+08	6.25335e+08	5.88216e+08	4.9902e+08	5.25738e+08	6.07688e+08	6.10914e+08	6.16505e+08	5.58731e+08	5.95635e+08	6.71226e+08	5.81721e+08	6.61202e+08	6.21305e+08	29.1566	28.8511	29.1565	29.0559	29.0676	29.1401	29.0443	29.2201	29.1318	28.8945	28.9698	29.1788	29.1864	29.1995	29.0576	29.1499	29.3222	29.1158	29.3005	29.2107
O08638	MYH11_MOUSE	Myosin-11 OS=Mus musculus GN=Myh11 PE=1 SV=1	Myh11	6.0453e+08	6.41566e+08	5.46496e+08	5.5841e+08	7.2965e+08	6.27641e+08	7.32255e+08	6.59165e+08	5.93322e+08	5.71309e+08	5.57221e+08	6.20757e+08	5.9622e+08	5.61684e+08	5.87639e+08	5.92851e+08	4.76923e+08	4.63582e+08	4.56601e+08	5.00948e+08	29.1712	29.257	29.0256	29.0567	29.4426	29.2254	29.4478	29.2961	29.1442	29.0897	29.0537	29.2095	29.1513	29.0652	29.1304	29.1431	28.8292	28.7882	28.7664	28.9001
Q9WUM4	COR1C_MOUSE	Coronin-1C OS=Mus musculus GN=Coro1c PE=1 SV=2	Coro1c	5.84337e+08	6.15198e+08	6.47632e+08	6.31155e+08	5.75634e+08	6.08508e+08	6.23936e+08	5.74899e+08	5.90863e+08	5.88235e+08	5.88913e+08	5.38703e+08	5.65281e+08	5.81884e+08	6.01084e+08	5.9264e+08	4.73631e+08	5.74932e+08	4.94202e+08	5.49608e+08	29.1222	29.1965	29.2706	29.2334	29.1006	29.1807	29.2168	29.0987	29.1382	29.1318	29.1335	29.0049	29.0744	29.1162	29.163	29.1426	28.8192	29.0988	28.8805	29.0338
Q3UQ44	IQGA2_MOUSE	Ras GTPase-activating-like protein IQGAP2 OS=Mus musculus GN=Iqgap2 PE=1 SV=2	Iqgap2	5.57346e+08	6.58909e+08	5.96177e+08	5.83338e+08	5.41134e+08	6.0952e+08	5.6771e+08	5.41023e+08	5.41287e+08	5.78581e+08	5.88986e+08	5.47379e+08	6.01354e+08	6.1343e+08	6.35391e+08	5.77475e+08	5.42796e+08	5.99222e+08	5.12004e+08	6.00831e+08	29.054	29.2955	29.1512	29.1198	29.0114	29.1831	29.0806	29.0111	29.0118	29.1079	29.1337	29.028	29.1636	29.1923	29.2431	29.1052	29.0158	29.1585	28.9316	29.1624
Q3UH53	SDK1_MOUSE	Protein sidekick-1 OS=Mus musculus GN=Sdk1 PE=2 SV=1	Sdk1	7.50467e+08	3.92382e+08	4.73406e+08	6.31477e+08	6.04819e+08	5.26726e+08	5.32652e+08	5.75948e+08	6.06514e+08	4.41561e+08	6.31578e+08	7.75432e+08	6.65212e+08	6.61867e+08	7.20363e+08	5.24783e+08	6.00964e+08	3.38825e+08	6.87661e+08	4.30284e+08	29.4832	28.5477	28.8185	29.2342	29.1719	28.9725	28.9886	29.1014	29.176	28.718	29.2344	29.5304	29.3092	29.302	29.4241	28.9671	29.1627	28.336	29.3571	28.6807
Q99L47	F10A1_MOUSE	Hsc70-interacting protein OS=Mus musculus GN=St13 PE=2 SV=1	St13 Fam10a1 Hip	6.18115e+08	6.61704e+08	6.29054e+08	7.06581e+08	6.63093e+08	6.17459e+08	5.60817e+08	5.72618e+08	5.76377e+08	6.14937e+08	5.56064e+08	5.29451e+08	5.15744e+08	5.27686e+08	5.36683e+08	5.56909e+08	5.03111e+08	5.60721e+08	4.9084e+08	5.74519e+08	29.2033	29.3016	29.2286	29.3963	29.3046	29.2018	29.063	29.093	29.1024	29.1959	29.0507	28.9799	28.9421	28.9751	28.9995	29.0529	28.9063	29.0627	28.8707	29.0978
Q69Z23	DYH17_MOUSE	Dynein heavy chain 17, axonemal OS=Mus musculus GN=Dnah17 PE=2 SV=2	Dnah17 Dnahc17 Kiaa3028	4.6039e+08	5.66769e+08	4.82642e+08	1.01334e+09	4.41584e+08	4.53914e+08	9.00177e+08	3.47266e+08	5.00918e+08	4.77971e+08	9.2263e+08	3.654e+08	4.59292e+08	4.58984e+08	1.0198e+09	4.68441e+08	4.53931e+08	4.38074e+08	8.33364e+08	4.95089e+08	28.7783	29.0782	28.8464	29.9165	28.7181	28.7578	29.7456	28.3715	28.9	28.8323	29.7812	28.4449	28.7748	28.7739	29.9256	28.8033	28.7579	28.7066	29.6344	28.8831
P11152	LIPL_MOUSE	Lipoprotein lipase OS=Mus musculus GN=Lpl PE=1 SV=3	Lpl	6.74554e+08	5.69216e+08	6.81124e+08	6.54393e+08	5.22389e+08	5.67864e+08	5.35022e+08	5.19725e+08	5.65018e+08	5.52534e+08	5.33367e+08	5.99826e+08	5.88267e+08	6.12001e+08	6.33401e+08	6.08571e+08	5.17053e+08	4.89926e+08	5.647e+08	5.69276e+08	29.3294	29.0844	29.3433	29.2856	28.9605	29.081	28.995	28.9532	29.0737	29.0415	28.9906	29.16	29.1319	29.189	29.2385	29.1808	28.9457	28.868	29.0729	29.0846
O35516	NOTC2_MOUSE	Neurogenic locus notch homolog protein 2 OS=Mus musculus GN=Notch2 PE=1 SV=1	Notch2	7.99691e+08	6.18569e+08	6.25377e+08	6.64361e+08	5.66531e+08	5.72674e+08	3.85602e+08	5.44701e+08	5.43647e+08	4.94353e+08	4.52928e+08	6.77169e+08	5.75713e+08	6.02703e+08	4.689e+08	7.03684e+08	6.52715e+08	4.87707e+08	4.70806e+08	5.76528e+08	29.5749	29.2044	29.2202	29.3074	29.0776	29.0931	28.5225	29.0209	29.0181	28.881	28.7547	29.3349	29.1008	29.1669	28.8047	29.3904	29.2819	28.8614	28.8106	29.1028
Q6NXJ0	WWC2_MOUSE	Protein WWC2 OS=Mus musculus GN=Wwc2 PE=2 SV=1	Wwc2 D8Ertd594e MNCb-4173	5.79687e+08	4.3932e+08	5.61558e+08	5.38151e+08	4.62431e+08	4.68537e+08	4.5728e+08	4.34463e+08	5.19895e+08	4.42759e+08	6.27811e+08	6.32627e+08	6.86869e+08	7.15724e+08	7.9756e+08	6.45942e+08	8.02171e+08	5.06517e+08	6.35356e+08	5.221e+08	29.1107	28.7107	29.0649	29.0034	28.7847	28.8036	28.7685	28.6947	28.9536	28.7219	29.2258	29.2368	29.3555	29.4148	29.571	29.2668	29.5793	28.916	29.243	28.9597
P59113	FERM1_MOUSE	Fermitin family homolog 1 OS=Mus musculus GN=Fermt1 PE=1 SV=4	Fermt1 Kind1 Urp1	5.51748e+08	5.21864e+08	5.37743e+08	3.42791e+08	4.97426e+08	5.82165e+08	4.34514e+08	5.371e+08	6.69815e+08	6.73009e+08	5.03124e+08	6.35561e+08	6.98451e+08	5.89074e+08	6.00479e+08	6.38747e+08	6.45731e+08	6.15908e+08	5.30621e+08	6.52627e+08	29.0394	28.9591	29.0023	28.3528	28.8899	29.1169	28.6948	29.0006	29.3192	29.326	28.9063	29.2435	29.3796	29.1339	29.1615	29.2507	29.2664	29.1981	28.9831	29.2817
P70348	GCM1_MOUSE	Chorion-specific transcription factor GCMa OS=Mus musculus GN=Gcm1 PE=1 SV=1	Gcm1 Gcma	5.66302e+08	8.31781e+08	5.58271e+08	6.38903e+08	7.9539e+08	6.58637e+08	8.73396e+08	9.36876e+08	5.28738e+08	5.41663e+08	5.07764e+08	4.35815e+08	5.47485e+08	4.7877e+08	4.78546e+08	4.94859e+08	4.10501e+08	3.98041e+08	3.46784e+08	4.22633e+08	29.077	29.6316	29.0564	29.251	29.5671	29.2949	29.7021	29.8033	28.978	29.0128	28.9196	28.6991	29.0282	28.8348	28.8341	28.8824	28.6128	28.5683	28.3695	28.6548
Q8BMJ2	SYLC_MOUSE	Leucine--tRNA ligase, cytoplasmic OS=Mus musculus GN=Lars PE=2 SV=2	Lars1 Lars	5.78768e+08	5.02657e+08	5.76747e+08	5.67566e+08	4.78392e+08	5.22501e+08	4.65237e+08	4.02263e+08	6.06058e+08	5.80913e+08	6.23886e+08	5.61473e+08	5.83127e+08	6.81724e+08	7.21544e+08	6.43989e+08	5.98779e+08	5.41146e+08	6.15636e+08	5.93668e+08	29.1084	28.905	29.1034	29.0802	28.8336	28.9609	28.7934	28.5836	29.1749	29.1137	29.2167	29.0646	29.1192	29.3446	29.4265	29.2625	29.1574	29.0114	29.1975	29.1451
Q99L45	IF2B_MOUSE	Eukaryotic translation initiation factor 2 subunit 2 OS=Mus musculus GN=Eif2s2 PE=1 SV=1	Eif2s2	5.32082e+08	5.8856e+08	6.98125e+08	9.10374e+08	9.04507e+08	4.5918e+08	4.84312e+08	3.71874e+08	5.19955e+08	3.5379e+08	6.92714e+08	4.06514e+08	3.75192e+08	5.89416e+08	7.26193e+08	5.10761e+08	4.90526e+08	4.85302e+08	9.41486e+08	3.01143e+08	28.9871	29.1326	29.3789	29.7619	29.7526	28.7745	28.8514	28.4702	28.9538	28.3983	29.3677	28.5987	28.4831	29.1347	29.4358	28.9281	28.8698	28.8543	29.8104	28.1659
Q8BH61	F13A_MOUSE	Coagulation factor XIII A chain OS=Mus musculus GN=F13a1 PE=2 SV=3	F13a1 F13a	6.21904e+08	5.08444e+08	6.2754e+08	5.9399e+08	5.33936e+08	5.29758e+08	5.72497e+08	5.23808e+08	6.73476e+08	5.09995e+08	5.87273e+08	6.21507e+08	5.45575e+08	6.0671e+08	6.65549e+08	5.96373e+08	4.94149e+08	4.8526e+08	5.29544e+08	4.86032e+08	29.2121	28.9215	29.2251	29.1459	28.9921	28.9808	29.0927	28.9645	29.3271	28.9259	29.1295	29.2112	29.0232	29.1764	29.31	29.1516	28.8804	28.8542	28.9802	28.8565
Q5SWU9	ACACA_MOUSE	Acetyl-CoA carboxylase 1 OS=Mus musculus GN=Acaca PE=1 SV=1	Acaca Acac Gm738	6.51699e+08	4.38459e+08	7.71943e+08	6.23152e+08	6.1717e+08	5.1079e+08	6.16976e+08	5.80639e+08	5.74003e+08	4.43533e+08	5.95597e+08	5.66234e+08	4.89222e+08	6.45103e+08	6.35006e+08	5.32563e+08	4.63062e+08	4.14146e+08	6.39448e+08	4.81626e+08	29.2796	28.7079	29.5239	29.215	29.2011	28.9282	29.2006	29.1131	29.0965	28.7245	29.1498	29.0768	28.8659	29.265	29.2422	28.9884	28.7866	28.6256	29.2523	28.8433
Q99NF8	RBP17_MOUSE	Ran-binding protein 17 OS=Mus musculus GN=Ranbp17 PE=2 SV=1	Ranbp17	4.98795e+08	5.08445e+08	5.58908e+08	5.54907e+08	4.59367e+08	5.61646e+08	6.35242e+08	4.62866e+08	5.94264e+08	5.50096e+08	6.15981e+08	5.7007e+08	5.17752e+08	5.71469e+08	7.90072e+08	5.68754e+08	5.33587e+08	5.85821e+08	5.76658e+08	5.67297e+08	28.8939	28.9215	29.058	29.0477	28.7751	29.0651	29.2427	28.786	29.1465	29.0351	29.1983	29.0866	28.9477	29.0901	29.5574	29.0832	28.9911	29.1259	29.1031	29.0795
Q61147	CERU_MOUSE	Ceruloplasmin OS=Mus musculus GN=Cp PE=1 SV=2	Cp	5.81539e+08	5.85009e+08	6.4822e+08	6.31465e+08	5.27431e+08	5.65678e+08	5.52678e+08	4.78777e+08	5.3597e+08	5.23444e+08	5.45467e+08	5.58331e+08	5.52444e+08	6.41123e+08	6.18049e+08	6.15207e+08	4.83862e+08	5.52472e+08	5.41521e+08	5.21335e+08	29.1153	29.1239	29.2719	29.2341	28.9744	29.0754	29.0419	28.8348	28.9976	28.9635	29.0229	29.0565	29.0413	29.256	29.2031	29.1965	28.85	29.0413	29.0124	28.9576
P50608	FMOD_MOUSE	Fibromodulin OS=Mus musculus GN=Fmod PE=2 SV=1	Fmod	5.82425e+08	5.56866e+08	6.35536e+08	5.71238e+08	4.87641e+08	6.58919e+08	5.34936e+08	5.52423e+08	5.47125e+08	5.95191e+08	5.39603e+08	5.70664e+08	5.44376e+08	5.62373e+08	6.16962e+08	6.14327e+08	4.72024e+08	5.98203e+08	4.67578e+08	5.10237e+08	29.1175	29.0528	29.2434	29.0895	28.8612	29.2955	28.9948	29.0412	29.0273	29.1488	29.0073	29.0881	29.02	29.067	29.2006	29.1944	28.8143	29.1561	28.8006	28.9266
Q61508	ECM1_MOUSE	Extracellular matrix protein 1 OS=Mus musculus GN=Ecm1 PE=1 SV=2	Ecm1	2.83763e+08	3.5271e+08	2.83445e+08	5.23871e+08	2.77784e+09	5.72962e+08	6.32244e+08	3.61846e+08	4.8941e+08	3.14705e+08	4.42863e+08	2.6681e+08	3.50012e+08	3.33074e+08	4.48893e+08	1.30028e+09	3.12028e+08	3.93009e+08	3.92214e+08	3.58645e+08	28.0801	28.3939	28.0785	28.9646	31.3713	29.0939	29.2359	28.4308	28.8665	28.2294	28.7223	27.9912	28.3828	28.3113	28.7418	30.2762	28.2171	28.55	28.5471	28.418
Q60847	COCA1_MOUSE	Collagen alpha-1(XII) chain OS=Mus musculus GN=Col12a1 PE=2 SV=3	Col12a1	6.07133e+08	5.6281e+08	6.26589e+08	5.66835e+08	5.66007e+08	4.53859e+08	4.73966e+08	5.05303e+08	5.42307e+08	4.58905e+08	5.37391e+08	5.98858e+08	6.38677e+08	6.48755e+08	6.31429e+08	7.40559e+08	5.31484e+08	4.7168e+08	5.22721e+08	4.82558e+08	29.1774	29.0681	29.2229	29.0784	29.0762	28.7577	28.8202	28.9126	29.0145	28.7736	29.0014	29.1576	29.2505	29.2731	29.234	29.464	28.9854	28.8132	28.9615	28.8461
Q9CQF9	PCYOX_MOUSE	Prenylcysteine oxidase OS=Mus musculus GN=Pcyox1 PE=1 SV=1	Pcyox1 Kiaa0908	6.28874e+08	4.16599e+08	6.209e+08	4.9747e+08	5.3594e+08	5.57494e+08	4.3275e+08	4.74804e+08	6.64247e+08	4.90259e+08	6.15664e+08	6.83719e+08	7.09147e+08	6.56545e+08	5.57306e+08	6.18734e+08	6.20585e+08	3.88286e+08	5.44701e+08	4.52586e+08	29.2282	28.6341	29.2098	28.89	28.9975	29.0544	28.689	28.8228	29.3071	28.869	29.1976	29.3488	29.4015	29.2903	29.0539	29.2047	29.2091	28.5325	29.0209	28.7536
P56399	UBP5_MOUSE	Ubiquitin carboxyl-terminal hydrolase 5 OS=Mus musculus GN=Usp5 PE=1 SV=1	Usp5 Isot	5.03024e+08	6.00952e+08	5.0587e+08	6.10804e+08	6.32945e+08	5.97995e+08	6.31095e+08	5.3239e+08	5.74124e+08	5.86509e+08	6.13277e+08	4.48186e+08	5.14129e+08	5.40945e+08	5.84247e+08	6.30038e+08	4.64336e+08	5.08764e+08	4.91005e+08	5.34449e+08	28.9061	29.1627	28.9142	29.1861	29.2375	29.1556	29.2333	28.9879	29.0968	29.1276	29.192	28.7395	28.9376	29.0109	29.122	29.2309	28.7906	28.9224	28.8712	28.9935
Q8CG03	PDE5A_MOUSE	cGMP-specific 3',5'-cyclic phosphodiesterase OS=Mus musculus GN=Pde5a PE=1 SV=2	Pde5a Pde5	5.69148e+08	5.53581e+08	6.21249e+08	5.86511e+08	6.29033e+08	5.40516e+08	5.3369e+08	4.92916e+08	5.51099e+08	5.2442e+08	5.47061e+08	5.48952e+08	5.27504e+08	5.59342e+08	6.06834e+08	6.84373e+08	4.81872e+08	5.29611e+08	4.71712e+08	5.24086e+08	29.0842	29.0442	29.2106	29.1276	29.2286	29.0098	28.9914	28.8768	29.0377	28.9661	29.0271	29.0321	28.9746	29.0592	29.1767	29.3502	28.8441	28.9804	28.8133	28.9652
Q9WVM1	RGAP1_MOUSE	Rac GTPase-activating protein 1 OS=Mus musculus GN=Racgap1 PE=2 SV=1	Racgap1 Mgcracgap	5.5373e+08	5.58234e+08	5.94915e+08	5.79628e+08	5.39004e+08	5.62942e+08	5.17099e+08	5.21149e+08	5.4897e+08	5.52819e+08	5.44526e+08	6.42377e+08	5.70957e+08	5.6266e+08	5.435e+08	5.56112e+08	5.77537e+08	5.12324e+08	5.08544e+08	5.18657e+08	29.0446	29.0563	29.1481	29.1106	29.0057	29.0684	28.9459	28.9571	29.0322	29.0422	29.0204	29.2588	29.0888	29.0677	29.0177	29.0508	29.1053	28.9325	28.9218	28.9502
Q9DD20	MET7B_MOUSE	Methyltransferase-like protein 7B OS=Mus musculus GN=Mettl7b PE=2 SV=2	Mettl7b	6.57635e+08	5.14701e+08	6.23342e+08	4.78335e+08	4.76522e+08	5.24299e+08	4.9303e+08	4.20046e+08	5.73487e+08	5.20395e+08	5.00776e+08	6.34558e+08	7.14761e+08	6.41498e+08	5.51657e+08	6.0252e+08	5.57129e+08	5.47479e+08	4.97875e+08	4.87616e+08	29.2927	28.9392	29.2154	28.8334	28.828	28.9658	28.8771	28.646	29.0952	28.955	28.8996	29.2412	29.4129	29.2569	29.0392	29.1664	29.0534	29.0282	28.8912	28.8612
Q03265	ATPA_MOUSE	ATP synthase subunit alpha, mitochondrial OS=Mus musculus GN=Atp5a1 PE=1 SV=1	Atp5f1a Atp5a1	7.54564e+08	3.30497e+08	6.73899e+08	4.86011e+08	4.57733e+08	3.89084e+08	4.88931e+08	5.79322e+08	5.82126e+08	3.70364e+08	6.23718e+08	7.64059e+08	7.37807e+08	5.9824e+08	6.91788e+08	6.83331e+08	4.71541e+08	3.8093e+08	4.4886e+08	4.37596e+08	29.4911	28.3001	29.328	28.8564	28.7699	28.5355	28.8651	29.1098	29.1168	28.4644	29.2163	29.5091	29.4587	29.1561	29.3658	29.348	28.8128	28.505	28.7417	28.705
Q5SUR0	PUR4_MOUSE	Phosphoribosylformylglycinamidine synthase OS=Mus musculus GN=Pfas PE=2 SV=1	Pfas Kiaa0361	4.96148e+08	6.14343e+08	5.42589e+08	6.08887e+08	5.15843e+08	5.64416e+08	4.97418e+08	5.55968e+08	5.27275e+08	5.09059e+08	5.30229e+08	5.46792e+08	5.18157e+08	5.6037e+08	5.67187e+08	5.44288e+08	5.31229e+08	6.02369e+08	5.49025e+08	5.49682e+08	28.8862	29.1945	29.0153	29.1816	28.9424	29.0722	28.8899	29.0504	28.974	28.9233	28.982	29.0264	28.9488	29.0618	29.0792	29.0198	28.9848	29.1661	29.0323	29.034
Q62000	MIME_MOUSE	Mimecan OS=Mus musculus GN=Ogn PE=2 SV=1	Ogn Og	5.50412e+08	5.49873e+08	5.79598e+08	5.53488e+08	5.08268e+08	5.5827e+08	5.80139e+08	4.91545e+08	5.28656e+08	5.16229e+08	5.58719e+08	5.25425e+08	5.86009e+08	5.70693e+08	6.17812e+08	5.59416e+08	5.05115e+08	5.16458e+08	5.10063e+08	5.15575e+08	29.0359	29.0345	29.1105	29.044	28.921	29.0564	29.1118	28.8727	28.9778	28.9434	29.0575	28.9689	29.1263	29.0881	29.2026	29.0593	28.912	28.9441	28.9261	28.9416
Q8BY87	UBP47_MOUSE	Ubiquitin carboxyl-terminal hydrolase 47 OS=Mus musculus GN=Usp47 PE=1 SV=2	Usp47	7.27313e+08	2.70506e+08	8.15504e+08	5.09842e+08	5.18641e+08	6.62954e+08	3.64712e+08	6.02477e+08	6.88645e+08	5.0148e+08	5.45105e+08	7.08069e+08	3.06304e+08	5.70691e+08	5.1398e+08	7.44036e+08	2.50463e+08	5.64798e+08	4.60098e+08	5.53526e+08	29.438	28.0111	29.6031	28.9255	28.9502	29.3043	28.4422	29.1663	29.3592	28.9016	29.022	29.3993	28.1904	29.0881	28.9371	29.4708	27.9	29.0732	28.7774	29.0441
P46460	NSF_MOUSE	Vesicle-fusing ATPase OS=Mus musculus GN=Nsf PE=1 SV=2	Nsf Skd2	5.1201e+08	5.60595e+08	4.96157e+08	5.27695e+08	5.755e+08	5.91512e+08	5.6048e+08	5.45971e+08	6.03994e+08	5.47855e+08	6.24243e+08	4.58626e+08	5.05708e+08	5.98282e+08	6.59994e+08	5.53039e+08	4.76254e+08	4.85196e+08	4.81958e+08	5.0592e+08	28.9316	29.0624	28.8862	28.9751	29.1002	29.1398	29.0621	29.0243	29.17	29.0292	29.2175	28.7727	28.9137	29.1563	29.2979	29.0428	28.8272	28.854	28.8443	28.9143
P12960	CNTN1_MOUSE	Contactin-1 OS=Mus musculus GN=Cntn1 PE=1 SV=1	Cntn1	6.39405e+08	5.23074e+08	7.0033e+08	6.50065e+08	4.73432e+08	5.60107e+08	5.22809e+08	4.64952e+08	5.48678e+08	4.77102e+08	5.33721e+08	5.98183e+08	5.54066e+08	5.66256e+08	6.61944e+08	5.5836e+08	4.69465e+08	3.92792e+08	4.96382e+08	4.45486e+08	29.2522	28.9624	29.3835	29.276	28.8186	29.0611	28.9617	28.7925	29.0314	28.8297	28.9915	29.156	29.0455	29.0769	29.3021	29.0566	28.8064	28.5492	28.8869	28.7308
Q8BXA0	LRFN5_MOUSE	Leucine-rich repeat and fibronectin type-III domain-containing protein 5 OS=Mus musculus GN=Lrfn5 PE=1 SV=1	Lrfn5 Kiaa4208 Salm5	5.46456e+08	7.01617e+08	5.23687e+08	5.58469e+08	6.04876e+08	4.9595e+08	4.87435e+08	5.90455e+08	4.47505e+08	4.90405e+08	5.42826e+08	5.49685e+08	4.3453e+08	4.66931e+08	4.03271e+08	5.7781e+08	4.99138e+08	7.10562e+08	5.36968e+08	6.1896e+08	29.0255	29.3861	28.9641	29.0569	29.1721	28.8856	28.8606	29.1373	28.7373	28.8694	29.0159	29.034	28.6949	28.7986	28.5872	29.106	28.8949	29.4044	29.0003	29.2053
Q08093	CNN2_MOUSE	Calponin-2 OS=Mus musculus GN=Cnn2 PE=2 SV=1	Cnn2	5.63805e+08	6.30676e+08	5.52359e+08	5.46181e+08	5.1659e+08	5.2788e+08	4.92178e+08	5.36521e+08	4.98897e+08	6.25058e+08	5.32146e+08	5.47893e+08	4.88973e+08	5.28363e+08	4.81234e+08	5.61184e+08	5.11066e+08	5.92362e+08	4.56342e+08	5.52326e+08	29.0706	29.2323	29.041	29.0248	28.9444	28.9756	28.8746	28.9991	28.8942	29.2194	28.9872	29.0293	28.8652	28.977	28.8422	29.0639	28.9289	29.1419	28.7655	29.0409
P23116	EIF3A_MOUSE	Eukaryotic translation initiation factor 3 subunit A OS=Mus musculus GN=Eif3a PE=1 SV=5	Eif3a Csma Eif3 Eif3s10	4.95648e+08	6.54518e+08	4.93255e+08	4.95481e+08	5.66609e+08	5.31991e+08	6.16141e+08	6.16277e+08	4.89771e+08	5.37701e+08	5.2238e+08	4.55951e+08	4.8727e+08	4.84735e+08	5.04342e+08	4.89463e+08	5.66628e+08	6.07986e+08	5.64318e+08	5.53535e+08	28.8847	29.2859	28.8778	28.8843	29.0778	28.9868	29.1987	29.199	28.8675	29.0022	28.9605	28.7643	28.8601	28.8526	28.9098	28.8666	29.0778	29.1795	29.0719	29.0441
O88947	FA10_MOUSE	Coagulation factor X OS=Mus musculus GN=F10 PE=1 SV=1	F10	4.77788e+08	7.04213e+08	4.99816e+08	5.04206e+08	5.233e+08	4.92342e+08	5.77788e+08	4.78793e+08	4.89947e+08	5.6972e+08	5.43311e+08	4.32422e+08	5.81061e+08	4.97e+08	5.83392e+08	4.79786e+08	5.55281e+08	6.01592e+08	5.55789e+08	5.70459e+08	28.8318	29.3914	28.8968	28.9094	28.9631	28.8751	29.106	28.8348	28.8681	29.0857	29.0172	28.6879	29.1141	28.8887	29.1199	28.8378	29.0486	29.1642	29.05	29.0875
P80313	TCPH_MOUSE	T-complex protein 1 subunit eta OS=Mus musculus GN=Cct7 PE=1 SV=1	Cct7 Ccth	5.46048e+08	4.98545e+08	5.36803e+08	5.04393e+08	4.07284e+08	4.75996e+08	3.96636e+08	4.54545e+08	5.88613e+08	5.59052e+08	5.37894e+08	5.97003e+08	5.34549e+08	5.59742e+08	5.47961e+08	5.65421e+08	6.19087e+08	5.60137e+08	5.90939e+08	5.89203e+08	29.0245	28.8931	28.9998	28.91	28.6015	28.8264	28.5632	28.7598	29.1327	29.0584	29.0027	29.1532	28.9937	29.0602	29.0295	29.0747	29.2056	29.0612	29.1384	29.1342
Q7TQH0	ATX2L_MOUSE	Ataxin-2-like protein OS=Mus musculus GN=Atxn2l PE=1 SV=1	Atxn2l A2lp	4.97818e+08	5.74438e+08	4.89027e+08	5.13697e+08	4.73769e+08	5.01123e+08	4.81709e+08	4.43697e+08	5.66603e+08	5.95677e+08	5.401e+08	5.39787e+08	5.60342e+08	5.42002e+08	5.37251e+08	6.00233e+08	5.51328e+08	5.5581e+08	5.09607e+08	5.95062e+08	28.891	29.0976	28.8653	28.9363	28.8196	28.9006	28.8436	28.725	29.0778	29.15	29.0086	29.0078	29.0617	29.0137	29.001	29.1609	29.0383	29.05	28.9248	29.1485
P20918	PLMN_MOUSE	Plasminogen OS=Mus musculus GN=Plg PE=1 SV=3	Plg	4.70434e+08	5.34734e+08	4.96772e+08	5.39932e+08	4.70621e+08	4.82054e+08	4.68513e+08	4.26749e+08	5.51819e+08	5.56601e+08	5.79417e+08	4.81585e+08	5.58881e+08	5.72316e+08	5.72727e+08	5.68036e+08	5.33437e+08	6.17808e+08	5.89675e+08	5.6699e+08	28.8094	28.9942	28.888	29.0082	28.81	28.8446	28.8035	28.6688	29.0396	29.0521	29.11	28.8432	29.058	29.0922	29.0933	29.0814	28.9907	29.2026	29.1353	29.0787
Q80W93	HYDIN_MOUSE	Hydrocephalus-inducing protein OS=Mus musculus GN=Hydin PE=2 SV=2	Hydin Hy3	4.84125e+08	5.19644e+08	4.77617e+08	5.49003e+08	5.06073e+08	5.39288e+08	6.02844e+08	4.74877e+08	5.25237e+08	5.47282e+08	5.73588e+08	4.94031e+08	5.55052e+08	5.41537e+08	6.31867e+08	5.14944e+08	5.18545e+08	4.85068e+08	5.70572e+08	4.99618e+08	28.8508	28.9529	28.8313	29.0322	28.9148	29.0065	29.1672	28.823	28.9684	29.0277	29.0954	28.88	29.048	29.0125	29.235	28.9398	28.9499	28.8536	29.0878	28.8963
P70227	ITPR3_MOUSE	Inositol 1,4,5-trisphosphate receptor type 3 OS=Mus musculus GN=Itpr3 PE=1 SV=3	Itpr3	7.10881e+08	4.44253e+08	5.05524e+08	4.66848e+08	5.15664e+08	4.49078e+08	5.49581e+08	5.18651e+08	5.37211e+08	4.54265e+08	5.32721e+08	5.8895e+08	6.21237e+08	5.31571e+08	5.69138e+08	5.45269e+08	5.43323e+08	4.38048e+08	5.33719e+08	5.19214e+08	29.405	28.7268	28.9132	28.7984	28.9419	28.7424	29.0338	28.9502	29.0009	28.759	28.9888	29.1336	29.2106	28.9857	29.0842	29.0224	29.0172	28.7065	28.9915	28.9518
P61161	ARP2_MOUSE	Actin-related protein 2 OS=Mus musculus GN=Actr2 PE=1 SV=1	Actr2 Arp2	6.3494e+08	6.87136e+08	6.23394e+08	4.62995e+08	5.1441e+08	5.93658e+08	5.1316e+08	5.06387e+08	4.95533e+08	6.13109e+08	3.93381e+08	5.37767e+08	5.76081e+08	5.30055e+08	4.65234e+08	4.00759e+08	6.09241e+08	4.37979e+08	3.90941e+08	5.79263e+08	29.242	29.356	29.2156	28.7864	28.9383	29.1451	28.9348	28.9157	28.8844	29.1916	28.5514	29.0024	29.1017	28.9816	28.7934	28.5782	29.1824	28.7063	28.5424	29.1096
Q5F226	FAT2_MOUSE	Protocadherin Fat 2 OS=Mus musculus GN=Fat2 PE=2 SV=1	Fat2 Fath2 Kiaa0811	6.32377e+08	5.50841e+08	4.68819e+08	5.52158e+08	5.20354e+08	5.5411e+08	5.16067e+08	5.25116e+08	5.37433e+08	5.52375e+08	5.07112e+08	5.34649e+08	5.56674e+08	5.36538e+08	4.86513e+08	4.96873e+08	5.37419e+08	5.23727e+08	4.49806e+08	5.20883e+08	29.2362	29.0371	28.8045	29.0405	28.9549	29.0456	28.943	28.9681	29.0015	29.0411	28.9177	28.994	29.0523	28.9991	28.8579	28.8883	29.0015	28.9642	28.7447	28.9564
Q5FWI3	TMEM2_MOUSE	Transmembrane protein 2 OS=Mus musculus GN=Tmem2 PE=1 SV=1	Cemip2 Kiaa1412 Tmem2	3.64938e+08	3.56689e+08	4.22463e+08	3.78605e+08	7.15481e+08	8.08432e+08	6.79944e+08	6.7898e+08	5.23147e+08	4.71378e+08	4.93737e+08	5.02199e+08	4.38931e+08	5.06078e+08	4.92963e+08	5.1088e+08	4.96281e+08	5.69165e+08	5.59465e+08	5.68353e+08	28.4431	28.4101	28.6543	28.4961	29.4143	29.5906	29.3408	29.3388	28.9626	28.8123	28.8792	28.9037	28.7094	28.9148	28.8769	28.9284	28.8866	29.0843	29.0595	29.0822
Q64523	H2A2C_MOUSE	Histone H2A type 2-C OS=Mus musculus GN=Hist2h2ac PE=1 SV=3	H2ac20 Hist2h2ab Hist2h2ac	3.2855e+08	2.27919e+08	1.84618e+08	3.12421e+08	4.04571e+08	2.64258e+08	3.84683e+08	5.30783e+08	4.36405e+08	3.56639e+08	5.52983e+08	4.62979e+08	3.88121e+08	4.50716e+08	2.90257e+08	3.93133e+08	1.46166e+09	8.1922e+08	1.60558e+09	6.55866e+08	28.2915	27.7639	27.46	28.2189	28.5918	27.9774	28.5191	28.9835	28.7011	28.4099	29.0427	28.7864	28.5319	28.7476	28.1128	28.5504	30.445	29.6097	30.5804	29.2888
P46638	RB11B_MOUSE	Ras-related protein Rab-11B OS=Mus musculus GN=Rab11b PE=1 SV=3	Rab11b	5.02012e+08	4.59872e+08	4.56619e+08	4.80717e+08	5.53624e+08	5.0873e+08	5.03057e+08	5.0859e+08	5.42021e+08	4.98908e+08	5.62367e+08	5.36129e+08	5.58939e+08	5.1647e+08	5.23422e+08	4.83507e+08	6.21451e+08	4.89173e+08	6.16853e+08	5.48333e+08	28.9031	28.7767	28.7664	28.8406	29.0443	28.9223	28.9061	28.9219	29.0138	28.8942	29.0669	28.998	29.0581	28.9441	28.9634	28.849	29.2111	28.8658	29.2004	29.0305
Q64324	STXB2_MOUSE	Syntaxin-binding protein 2 OS=Mus musculus GN=Stxbp2 PE=2 SV=1	Stxbp2 Unc18b	4.61015e+08	5.59537e+08	2.72803e+08	3.92526e+08	6.82734e+08	5.38418e+08	5.43712e+08	5.34327e+08	5.88481e+08	5.46884e+08	4.97896e+08	4.28284e+08	5.15253e+08	3.63384e+08	3.66165e+08	3.34342e+08	7.04081e+08	6.11297e+08	7.58287e+08	7.57854e+08	28.7802	29.0597	28.0233	28.5482	29.3467	29.0042	29.0183	28.9931	29.1324	29.0267	28.8913	28.674	28.9407	28.4369	28.4479	28.3167	29.3912	29.1873	29.4982	29.4973
Q6PR54	RIF1_MOUSE	Telomere-associated protein RIF1 OS=Mus musculus GN=Rif1 PE=1 SV=2	Rif1	5.2174e+08	5.44985e+08	5.6082e+08	5.76435e+08	4.9438e+08	5.09279e+08	5.60497e+08	4.73711e+08	4.64056e+08	4.83985e+08	4.86273e+08	6.16671e+08	4.48218e+08	5.25181e+08	5.64748e+08	5.46082e+08	4.31308e+08	6.03594e+08	5.19562e+08	4.9864e+08	28.9588	29.0216	29.063	29.1026	28.881	28.9239	29.0621	28.8194	28.7897	28.8504	28.8572	29.1999	28.7396	28.9682	29.073	29.0245	28.6841	29.169	28.9527	28.8934
Q9ES52	SHIP1_MOUSE	Phosphatidylinositol 3,4,5-trisphosphate 5-phosphatase 1 OS=Mus musculus GN=Inpp5d PE=1 SV=2	Inpp5d 7a33 Ship Ship1	4.93057e+08	6.33758e+08	5.16288e+08	6.77116e+08	5.89997e+08	5.77404e+08	6.5361e+08	5.67569e+08	4.63049e+08	5.44068e+08	4.59936e+08	4.0937e+08	5.41093e+08	4.90344e+08	4.51823e+08	5.2919e+08	3.31488e+08	5.81147e+08	4.371e+08	4.10885e+08	28.8772	29.2394	28.9436	29.3348	29.1361	29.105	29.2839	29.0802	28.7866	29.0192	28.7769	28.6088	29.0113	28.8692	28.7512	28.9792	28.3044	29.1143	28.7034	28.6142
P11438	LAMP1_MOUSE	Lysosome-associated membrane glycoprotein 1 OS=Mus musculus GN=Lamp1 PE=1 SV=2	Lamp1 Lamp-1	5.50721e+08	5.2877e+08	5.56335e+08	5.83622e+08	4.28665e+08	4.98969e+08	4.42797e+08	5.15781e+08	4.48362e+08	4.84122e+08	4.54504e+08	5.15821e+08	4.6831e+08	5.89829e+08	4.95268e+08	5.56547e+08	5.32343e+08	5.60558e+08	5.32597e+08	5.89189e+08	29.0367	28.9781	29.0514	29.1205	28.6753	28.8944	28.7221	28.9422	28.7401	28.8508	28.7597	28.9423	28.8029	29.1357	28.8836	29.0519	28.9878	29.0623	28.9885	29.1342
Q9D180	CFA57_MOUSE	Cilia- and flagella-associated protein 57 OS=Mus musculus GN=Cfap57 PE=2 SV=3	Cfap57 Wdr65	2.07816e+08	3.30826e+08	1.23143e+08	2.8566e+08	4.26723e+08	2.8171e+08	5.40921e+08	4.58645e+08	4.3923e+08	5.7729e+08	4.36595e+08	3.74289e+08	3.32409e+08	3.90564e+08	2.54938e+08	3.62251e+08	9.03635e+08	1.33088e+09	1.17286e+09	1.10061e+09	27.6307	28.3015	26.8758	28.0897	28.6687	28.0696	29.0108	28.7728	28.7104	29.1047	28.7017	28.4796	28.3084	28.541	27.9256	28.4324	29.7512	30.3097	30.1274	30.0357
Q8BGV3	TACD2_MOUSE	Tumor-associated calcium signal transducer 2 OS=Mus musculus GN=Tacstd2 PE=2 SV=1	Tacstd2 Trop2	5.28141e+08	4.75602e+08	5.08031e+08	5.89636e+08	6.90505e+08	6.65216e+08	6.64135e+08	6.65549e+08	4.97016e+08	5.42438e+08	4.99118e+08	4.83301e+08	3.89545e+08	4.41229e+08	4.22957e+08	4.43526e+08	3.69519e+08	4.92598e+08	4.58211e+08	4.67475e+08	28.9763	28.8252	28.9203	29.1352	29.3631	29.3092	29.3069	29.31	28.8887	29.0149	28.8948	28.8483	28.5372	28.717	28.6559	28.7244	28.4611	28.8758	28.7714	28.8003
Q7TNG5	EMAL2_MOUSE	Echinoderm microtubule-associated protein-like 2 OS=Mus musculus GN=Eml2 PE=2 SV=1	Eml2	5.11502e+08	5.25006e+08	5.49701e+08	5.6019e+08	4.81313e+08	5.18992e+08	5.44351e+08	4.56515e+08	5.39216e+08	5.5155e+08	5.89893e+08	4.97786e+08	5.43396e+08	4.98585e+08	5.70625e+08	4.76444e+08	4.18119e+08	4.97822e+08	4.55449e+08	4.78634e+08	28.9302	28.9678	29.0341	29.0613	28.8424	28.9511	29.02	28.7661	29.0063	29.0389	29.1359	28.8909	29.0174	28.8933	29.088	28.8277	28.6393	28.8911	28.7627	28.8343
O70157	TOP3A_MOUSE	DNA topoisomerase 3-alpha OS=Mus musculus GN=Top3a PE=1 SV=1	Top3a Top3	5.20365e+08	5.77058e+08	4.62991e+08	5.31211e+08	5.01515e+08	4.66283e+08	5.84286e+08	4.81495e+08	5.1803e+08	5.74047e+08	5.45457e+08	4.65874e+08	5.1677e+08	5.03409e+08	5.05286e+08	5.2763e+08	4.41437e+08	5.5576e+08	4.76207e+08	4.96607e+08	28.9549	29.1041	28.7864	28.9847	28.9017	28.7966	29.1221	28.8429	28.9485	29.0966	29.0229	28.7954	28.9449	28.9072	28.9125	28.975	28.7176	29.0499	28.827	28.8875
Q61990	PCBP2_MOUSE	Poly(rC)-binding protein 2 OS=Mus musculus GN=Pcbp2 PE=1 SV=1	Pcbp2 Cbp Hnrnpx Hnrpx	3.92484e+08	3.93032e+08	3.13532e+08	3.70053e+08	6.5756e+08	5.65285e+08	4.51868e+08	5.30261e+08	5.8864e+08	5.33061e+08	5.56351e+08	5.37001e+08	4.62409e+08	4.31227e+08	4.17713e+08	3.87398e+08	7.16676e+08	5.31411e+08	7.40777e+08	6.66105e+08	28.5481	28.5501	28.224	28.4632	29.2925	29.0744	28.7513	28.9821	29.1328	28.9897	29.0514	29.0003	28.7846	28.6839	28.6379	28.5292	29.4167	28.9853	29.4645	29.3112
Q3THS6	METK2_MOUSE	S-adenosylmethionine synthase isoform type-2 OS=Mus musculus GN=Mat2a PE=2 SV=2	Mat2a	4.94942e+08	5.31365e+08	5.57859e+08	4.97568e+08	4.25883e+08	5.18091e+08	4.83494e+08	4.52993e+08	5.66974e+08	5.27593e+08	4.92531e+08	5.66504e+08	5.60824e+08	5.46533e+08	5.55771e+08	5.49821e+08	4.94267e+08	4.4708e+08	4.72196e+08	4.79714e+08	28.8827	28.9851	29.0553	28.8903	28.6659	28.9486	28.8489	28.7549	29.0787	28.9749	28.8756	29.0775	29.063	29.0257	29.0499	29.0344	28.8807	28.736	28.8148	28.8376
Q8K354	CBR3_MOUSE	Carbonyl reductase [NADPH] 3 OS=Mus musculus GN=Cbr3 PE=2 SV=1	Cbr3	4.55593e+08	6.18449e+08	4.01278e+08	4.02466e+08	5.1664e+08	5.69936e+08	5.99485e+08	4.83392e+08	6.41364e+08	5.77525e+08	5.91222e+08	3.82322e+08	4.58047e+08	5.18283e+08	7.10845e+08	4.74649e+08	4.03831e+08	4.5955e+08	4.56764e+08	4.77859e+08	28.7632	29.2041	28.58	28.5843	28.9446	29.0862	29.1591	28.8486	29.2566	29.1053	29.1391	28.5102	28.7709	28.9492	29.405	28.8223	28.5892	28.7756	28.7669	28.832
Q8VC12	HUTU_MOUSE	Urocanate hydratase OS=Mus musculus GN=Uroc1 PE=2 SV=2	Uroc1	5.25813e+08	5.48975e+08	5.12452e+08	5.65487e+08	4.6327e+08	5.16675e+08	4.89796e+08	5.23418e+08	4.90314e+08	5.12555e+08	5.01646e+08	5.48339e+08	5.36305e+08	5.092e+08	5.07305e+08	5.48406e+08	4.36229e+08	4.98719e+08	4.61729e+08	4.97458e+08	28.97	29.0322	28.9328	29.0749	28.7873	28.9447	28.8676	28.9634	28.8691	28.9331	28.9021	29.0305	28.9985	28.9237	28.9183	29.0307	28.7005	28.8937	28.7825	28.89
Q06806	TIE1_MOUSE	Tyrosine-protein kinase receptor Tie-1 OS=Mus musculus GN=Tie1 PE=2 SV=3	Tie1 Tie Tie-1	3.58529e+08	5.88605e+08	5.40138e+08	5.00487e+08	5.38111e+08	5.12655e+08	4.63429e+08	4.96519e+08	4.49921e+08	5.41702e+08	5.02787e+08	5.34685e+08	4.4965e+08	5.13749e+08	4.1568e+08	4.93542e+08	4.78096e+08	6.21472e+08	5.19488e+08	6.74478e+08	28.4175	29.1327	29.0088	28.8988	29.0033	28.9334	28.7878	28.8873	28.7451	29.0129	28.9054	28.9941	28.7442	28.9365	28.6309	28.8786	28.8327	29.2111	28.9525	29.3292
Q8BI06	CEMIP_MOUSE	Cell migration-inducing and hyaluronan-binding protein OS=Mus musculus GN=Cemip PE=1 SV=4	Cemip Kiaa1199	5.77745e+08	2.92104e+08	6.20285e+08	4.38689e+08	4.21234e+08	3.49459e+08	3.84754e+08	3.65103e+08	4.61015e+08	2.69538e+08	5.09253e+08	6.77435e+08	6.44138e+08	7.78732e+08	7.52995e+08	6.82115e+08	7.06277e+08	2.85278e+08	6.32548e+08	3.4327e+08	29.1059	28.1219	29.2084	28.7086	28.65	28.3805	28.5194	28.4437	28.7802	28.0059	28.9238	29.3355	29.2628	29.5366	29.4881	29.3454	29.3957	28.0878	29.2366	28.3548
Q811D2	ANR26_MOUSE	Ankyrin repeat domain-containing protein 26 OS=Mus musculus GN=Ankrd26 PE=1 SV=2	Ankrd26 Kiaa1074	1.01984e+09	3.87407e+08	9.67568e+08	1.45931e+08	5.02518e+08	4.14686e+08	4.028e+07	4.59761e+08	7.43529e+08	3.43889e+08	8.3302e+07	9.7544e+08	7.97454e+08	7.6711e+08	1.98779e+08	8.07474e+08	7.47451e+08	2.89623e+08	1.65723e+08	3.26432e+08	29.9257	28.5293	29.8498	27.1207	28.9046	28.6274	25.2636	28.7763	29.4698	28.3574	26.3118	29.8615	29.5708	29.5149	27.5666	29.5888	29.4774	28.1096	27.3042	28.2822
Q3UV17	K22O_MOUSE	Keratin, type II cytoskeletal 2 oral OS=Mus musculus GN=Krt76 PE=2 SV=1	Krt76	8.88209e+08	5.20124e+08	3.31694e+08	7.80529e+08	4.71545e+08	6.70102e+08	8.31515e+08	7.06259e+08	4.98301e+08	4.75714e+08	3.53431e+08	4.75048e+08	3.62529e+08	5.39407e+08	3.85139e+08	2.82015e+08	3.81757e+08	4.42452e+08	3.27617e+08	4.18113e+08	29.7263	28.9543	28.3053	29.5399	28.8128	29.3198	29.6312	29.3956	28.8924	28.8255	28.3969	28.8235	28.4335	29.0068	28.5208	28.0712	28.5081	28.7209	28.2874	28.6393
Q8CAL5	GPC5_MOUSE	Glypican-5 OS=Mus musculus GN=Gpc5 PE=2 SV=1	Gpc5	5.7057e+08	3.63591e+08	6.3263e+08	5.08075e+08	4.67595e+08	4.72986e+08	4.16481e+08	4.58892e+08	6.04235e+08	4.37071e+08	5.85852e+08	6.09898e+08	6.2539e+08	5.89126e+08	6.12242e+08	5.41705e+08	4.81483e+08	2.79084e+08	5.13621e+08	3.46615e+08	29.0878	28.4377	29.2368	28.9205	28.8007	28.8172	28.6337	28.7736	29.1705	28.7033	29.126	29.184	29.2202	29.134	29.1895	29.0129	28.8429	28.0561	28.9361	28.3688
Q3TZW0	ECSCR_MOUSE	Endothelial cell-specific chemotaxis regulator OS=Mus musculus GN=Ecscr PE=2 SV=2	Ecscr Ecsm2	6.48622e+08	2.05413e+08	6.74258e+08	5.06446e+08	6.40367e+08	5.45735e+08	4.33495e+08	6.83476e+08	5.00654e+08	2.52009e+08	4.85495e+08	6.95757e+08	5.86103e+08	5.54084e+08	5.74439e+08	5.8709e+08	5.1834e+08	2.45175e+08	5.08371e+08	2.68544e+08	29.2728	27.614	29.3287	28.9158	29.2543	29.0236	28.6914	29.3483	28.8992	27.9089	28.8549	29.374	29.1266	29.0455	29.0976	29.129	28.9493	27.8692	28.9213	28.0006
P22907	HEM3_MOUSE	Porphobilinogen deaminase OS=Mus musculus GN=Hmbs PE=2 SV=2	Hmbs Uros1	4.94583e+08	4.69753e+08	5.17717e+08	4.69439e+08	4.97135e+08	4.94275e+08	4.31875e+08	4.43806e+08	5.60591e+08	5.11764e+08	5.25399e+08	5.45817e+08	5.27216e+08	5.65935e+08	4.95208e+08	5.46732e+08	5.32114e+08	4.55496e+08	5.02752e+08	5.12673e+08	28.8816	28.8073	28.9476	28.8064	28.8891	28.8807	28.686	28.7254	29.0624	28.9309	28.9688	29.0238	28.9738	29.0761	28.8835	29.0263	28.9872	28.7629	28.9053	28.9335
Q91ZU6	DYST_MOUSE	Dystonin OS=Mus musculus GN=Dst PE=1 SV=1	Dst Bpag1 Macf2	5.55184e+08	5.10726e+08	5.57022e+08	5.35363e+08	4.7383e+08	4.75724e+08	4.56069e+08	5.09177e+08	4.61678e+08	4.94877e+08	4.80985e+08	5.18262e+08	4.69999e+08	5.12284e+08	5.82237e+08	5.61653e+08	4.44901e+08	4.85161e+08	4.49804e+08	5.48056e+08	29.0484	28.928	29.0532	28.9959	28.8198	28.8256	28.7647	28.9236	28.7823	28.8825	28.8414	28.9491	28.8081	28.9324	29.117	29.0651	28.7289	28.8539	28.7447	29.0297
Q9DBV4	MXRA8_MOUSE	Matrix-remodeling-associated protein 8 OS=Mus musculus GN=Mxra8 PE=2 SV=1	Mxra8 Asp3 Dicam	5.40678e+08	5.00083e+08	5.86828e+08	5.376e+08	4.08753e+08	4.65287e+08	5.28886e+08	3.63196e+08	4.61308e+08	5.14674e+08	5.21764e+08	5.44796e+08	4.93859e+08	5.18875e+08	6.40449e+08	5.11959e+08	4.07496e+08	5.29164e+08	5.06622e+08	5.00678e+08	29.0102	28.8976	29.1284	29.002	28.6067	28.7935	28.9784	28.4362	28.7812	28.9391	28.9588	29.0211	28.8795	28.9508	29.2545	28.9315	28.6022	28.9791	28.9163	28.8993
P70697	DCUP_MOUSE	Uroporphyrinogen decarboxylase OS=Mus musculus GN=Urod PE=1 SV=2	Urod	5.30523e+08	4.67332e+08	5.46127e+08	5.13145e+08	4.51412e+08	5.43014e+08	5.19258e+08	4.31957e+08	5.34437e+08	5.06294e+08	4.84618e+08	5.41564e+08	4.94911e+08	5.65995e+08	5.95287e+08	5.3843e+08	4.62856e+08	4.33081e+08	4.70998e+08	4.45156e+08	28.9828	28.7999	29.0247	28.9348	28.7499	29.0164	28.9519	28.6863	28.9934	28.9154	28.8523	29.0126	28.8826	29.0762	29.149	29.0042	28.786	28.6901	28.8111	28.7297
Q8BU30	SYIC_MOUSE	Isoleucine--tRNA ligase, cytoplasmic OS=Mus musculus GN=Iars PE=2 SV=2	Iars1 Iars	4.57256e+08	5.70987e+08	4.56077e+08	4.36241e+08	5.09098e+08	4.659e+08	4.4962e+08	6.021e+08	4.68614e+08	4.71804e+08	4.46437e+08	5.10537e+08	5.54543e+08	4.73265e+08	4.34989e+08	4.87783e+08	5.82295e+08	6.09903e+08	4.95031e+08	5.91874e+08	28.7684	29.0889	28.7647	28.7005	28.9234	28.7954	28.7441	29.1654	28.8038	28.8136	28.7339	28.9274	29.0467	28.8181	28.6964	28.8617	29.1172	29.184	28.8829	29.1407
Q61263	SOAT1_MOUSE	Sterol O-acyltransferase 1 OS=Mus musculus GN=Soat1 PE=2 SV=2	Soat1 Acact	4.62889e+08	5.27282e+08	4.91333e+08	5.52175e+08	4.71892e+08	5.48224e+08	5.56975e+08	4.90356e+08	5.06948e+08	5.70641e+08	5.33119e+08	4.38853e+08	5.18047e+08	5.15059e+08	5.69742e+08	5.06035e+08	3.64935e+08	5.69675e+08	4.35193e+08	4.39757e+08	28.7861	28.974	28.8721	29.0406	28.8139	29.0302	29.053	28.8693	28.9173	29.088	28.9899	28.7092	28.9485	28.9402	29.0857	28.9147	28.4431	29.0856	28.6971	28.7121
Q8CHR6	DPYD_MOUSE	Dihydropyrimidine dehydrogenase [NADP(+)] OS=Mus musculus GN=Dpyd PE=2 SV=1	Dpyd	6.01229e+08	4.07111e+08	7.15951e+08	5.75308e+08	5.26926e+08	5.00013e+08	4.15526e+08	4.86784e+08	4.82854e+08	3.91005e+08	5.56212e+08	5.71627e+08	5.02873e+08	4.9897e+08	5.40221e+08	5.52791e+08	4.83502e+08	3.54344e+08	4.95531e+08	3.38027e+08	29.1633	28.6008	29.4153	29.0998	28.973	28.8974	28.6304	28.8587	28.847	28.5426	29.0511	29.0905	28.9056	28.8944	29.009	29.0422	28.8489	28.4006	28.8844	28.3326
P80315	TCPD_MOUSE	T-complex protein 1 subunit delta OS=Mus musculus GN=Cct4 PE=1 SV=3	Cct4 Cctd	4.67366e+08	4.67291e+08	4.42908e+08	4.5507e+08	4.07377e+08	4.41417e+08	4.6682e+08	4.47907e+08	5.23238e+08	5.44723e+08	5.30553e+08	5.09862e+08	4.95841e+08	4.72571e+08	4.88087e+08	4.76543e+08	5.85565e+08	5.82397e+08	5.53068e+08	6.02108e+08	28.8	28.7997	28.7224	28.7615	28.6018	28.7176	28.7983	28.7386	28.9629	29.0209	28.9829	28.9255	28.8853	28.816	28.8626	28.828	29.1253	29.1174	29.0429	29.1654
Q64277	BST1_MOUSE	ADP-ribosyl cyclase 2 OS=Mus musculus GN=Bst1 PE=1 SV=1	Bst1 Bp-3 Bp3 Ly65	4.38771e+08	4.71946e+08	3.17165e+08	4.50579e+08	1.01969e+09	7.86056e+08	7.7867e+08	8.32139e+08	4.59851e+08	5.42624e+08	4.26402e+08	3.92981e+08	3.87392e+08	3.60871e+08	3.56351e+08	3.51715e+08	3.69525e+08	3.53604e+08	4.16392e+08	4.05686e+08	28.7089	28.814	28.2407	28.7472	29.9255	29.5501	29.5364	29.6322	28.7766	29.0154	28.6676	28.5499	28.5292	28.4269	28.4087	28.3898	28.4611	28.3976	28.6334	28.5958
O09172	GSH0_MOUSE	Glutamate--cysteine ligase regulatory subunit OS=Mus musculus GN=Gclm PE=2 SV=1	Gclm Glclr	4.25749e+08	4.66014e+08	6.09253e+08	5.05831e+08	3.91485e+08	5.29459e+08	5.3402e+08	3.77637e+08	4.79715e+08	4.95468e+08	4.76262e+08	4.70957e+08	4.53677e+08	4.90323e+08	6.14202e+08	5.03503e+08	4.71903e+08	6.09615e+08	4.83822e+08	4.90356e+08	28.6654	28.7958	29.1825	28.9141	28.5444	28.9799	28.9923	28.4924	28.8376	28.8842	28.8272	28.811	28.7571	28.8692	29.1941	28.9074	28.8139	29.1833	28.8499	28.8693
Q6IE82	JADE3_MOUSE	Protein Jade-3 OS=Mus musculus GN=Phf16 PE=2 SV=1	Jade3 Kiaa0215 Phf16	4.35107e+08	4.97252e+08	4.76571e+08	4.65727e+08	4.66304e+08	4.67175e+08	5.99036e+08	4.38455e+08	4.92809e+08	5.03053e+08	5.29498e+08	4.50486e+08	5.1141e+08	4.9504e+08	5.60287e+08	4.92167e+08	4.90658e+08	5.19141e+08	4.86242e+08	5.00937e+08	28.6968	28.8894	28.8281	28.7949	28.7967	28.7994	29.1581	28.7079	28.8765	28.9061	28.98	28.7469	28.9299	28.883	29.0616	28.8746	28.8701	28.9515	28.8571	28.9001
P15975	UBP53_MOUSE	Inactive ubiquitin carboxyl-terminal hydrolase 53 OS=Mus musculus GN=Usp53 PE=2 SV=2	Usp53 Phxr3	3.39752e+08	4.8584e+08	4.87074e+08	4.58698e+08	5.74375e+08	3.77007e+08	3.52592e+08	5.41373e+08	4.11734e+08	4.6179e+08	3.72004e+08	7.10844e+08	5.14801e+08	4.39729e+08	2.84133e+08	3.57302e+08	5.92579e+08	6.69248e+08	6.37069e+08	8.05776e+08	28.3399	28.8559	28.8596	28.773	29.0974	28.49	28.3934	29.012	28.6171	28.7827	28.4707	29.405	28.9394	28.712	28.082	28.4126	29.1424	29.318	29.2469	29.5858
Q62383	SPT6H_MOUSE	Transcription elongation factor SPT6 OS=Mus musculus GN=Supt6h PE=1 SV=2	Supt6h Kiaa0162 Supt6	4.35148e+08	5.13861e+08	4.64827e+08	4.82675e+08	4.41211e+08	4.62379e+08	4.54169e+08	4.30269e+08	5.07896e+08	5.37764e+08	5.09356e+08	4.82699e+08	5.11052e+08	5.35394e+08	5.42494e+08	5.03378e+08	4.65607e+08	5.35165e+08	5.18687e+08	5.3221e+08	28.6969	28.9368	28.7921	28.8465	28.7169	28.7845	28.7587	28.6807	28.92	29.0024	28.9241	28.8465	28.9289	28.996	29.015	28.9071	28.7945	28.9954	28.9503	28.9874
P51655	GPC4_MOUSE	Glypican-4 OS=Mus musculus GN=Gpc4 PE=2 SV=2	Gpc4	5.48125e+08	3.60965e+08	4.43394e+08	4.60296e+08	4.59253e+08	5.68806e+08	3.46544e+08	5.22691e+08	5.13226e+08	3.75656e+08	4.34459e+08	4.82411e+08	5.29168e+08	6.0215e+08	4.62295e+08	5.64811e+08	5.18367e+08	5.47639e+08	5.18888e+08	5.55521e+08	29.0299	28.4273	28.724	28.778	28.7747	29.0834	28.3685	28.9614	28.935	28.4848	28.6946	28.8457	28.9791	29.1655	28.7842	29.0732	28.9494	29.0286	28.9508	29.0493
Q923E4	SIR1_MOUSE	NAD-dependent protein deacetylase sirtuin-1 OS=Mus musculus GN=Sirt1 PE=1 SV=2	Sirt1 Sir2l1	4.48946e+08	4.97049e+08	4.20597e+08	4.88677e+08	4.72516e+08	4.84858e+08	5.14969e+08	4.63492e+08	4.87609e+08	5.52337e+08	5.11061e+08	4.3659e+08	5.08109e+08	4.96294e+08	5.64922e+08	4.57033e+08	4.24068e+08	5.42953e+08	4.62547e+08	5.36202e+08	28.742	28.8888	28.6479	28.8643	28.8158	28.853	28.9399	28.788	28.8611	29.041	28.9289	28.7017	28.9206	28.8866	29.0735	28.7677	28.6597	29.0163	28.785	28.9982
Q6P9Q4	FHOD1_MOUSE	FH1/FH2 domain-containing protein 1 OS=Mus musculus GN=Fhod1 PE=2 SV=3	Fhod1 Fhos1	7.20327e+08	3.32506e+08	6.40404e+08	5.6008e+08	5.03838e+08	2.64135e+08	2.40714e+08	4.11647e+08	5.05212e+08	1.9587e+08	5.74141e+08	7.61629e+08	5.13636e+08	5.27555e+08	3.81396e+08	5.06598e+08	7.97195e+08	2.62805e+08	7.49834e+08	2.72763e+08	29.4241	28.3088	29.2544	29.0611	28.9084	27.9767	27.8427	28.6168	28.9123	27.5453	29.0968	29.5045	28.9362	28.9747	28.5067	28.9163	29.5704	27.9694	29.482	28.0231
P27773	PDIA3_MOUSE	Protein disulfide-isomerase A3 OS=Mus musculus GN=Pdia3 PE=1 SV=2	Pdia3 Erp Erp60 Grp58	4.77762e+08	4.18736e+08	5.26567e+08	5.24943e+08	4.30812e+08	4.84804e+08	5.0815e+08	4.34783e+08	5.05843e+08	4.58641e+08	5.28022e+08	4.81217e+08	5.02091e+08	5.24629e+08	5.87363e+08	4.86578e+08	4.36092e+08	4.30206e+08	5.14604e+08	4.53164e+08	28.8317	28.6415	28.972	28.9676	28.6825	28.8528	28.9207	28.6957	28.9141	28.7728	28.976	28.8421	28.9034	28.9667	29.1297	28.8581	28.7001	28.6805	28.9389	28.7555
P50396	GDIA_MOUSE	Rab GDP dissociation inhibitor alpha OS=Mus musculus GN=Gdi1 PE=1 SV=3	Gdi1 Rabgdia	4.87417e+08	4.28252e+08	4.90473e+08	4.98631e+08	4.18467e+08	4.6247e+08	4.59993e+08	4.44303e+08	4.91132e+08	4.86673e+08	5.33497e+08	4.9541e+08	5.1404e+08	5.04733e+08	5.22474e+08	5.21893e+08	4.4216e+08	4.8751e+08	5.04359e+08	4.93325e+08	28.8606	28.6739	28.8696	28.8934	28.6405	28.7848	28.777	28.727	28.8715	28.8584	28.9909	28.884	28.9373	28.9109	28.9608	28.9592	28.72	28.8609	28.9099	28.878
P97823	LYPA1_MOUSE	Acyl-protein thioesterase 1 OS=Mus musculus GN=Lypla1 PE=1 SV=1	Lypla1 Apt1 Pla1a	2.82482e+08	3.07293e+08	3.76811e+08	5.68285e+08	1.4282e+09	5.23599e+08	5.43137e+08	2.41057e+08	4.64427e+08	3.09953e+08	4.41258e+08	2.78612e+08	3.43531e+08	2.95621e+08	4.67791e+08	1.6101e+09	2.8517e+08	2.96708e+08	2.87864e+08	2.93191e+08	28.0736	28.195	28.4893	29.082	30.4116	28.9639	29.0167	27.8448	28.7909	28.2075	28.717	28.0537	28.3559	28.1392	28.8013	30.5845	28.0872	28.1445	28.1008	28.1273
Q9JIG7	CCD22_MOUSE	Coiled-coil domain-containing protein 22 OS=Mus musculus GN=Ccdc22 PE=1 SV=1	Ccdc22 DXImx40e	5.83625e+08	5.40363e+08	5.95896e+08	5.16297e+08	4.54875e+08	4.56286e+08	4.05059e+08	3.87058e+08	4.67651e+08	4.38493e+08	4.77677e+08	5.0591e+08	4.72632e+08	5.21125e+08	4.97889e+08	5.05332e+08	4.85621e+08	4.17431e+08	4.46584e+08	4.38853e+08	29.1205	29.0094	29.1505	28.9436	28.7609	28.7654	28.5936	28.528	28.8009	28.708	28.8315	28.9143	28.8161	28.9571	28.8912	28.9127	28.8553	28.637	28.7344	28.7092
O35375	NRP2_MOUSE	Neuropilin-2 OS=Mus musculus GN=Nrp2 PE=2 SV=2	Nrp2	5.1113e+08	5.13256e+08	4.66662e+08	4.76549e+08	5.49376e+08	4.47691e+08	5.76281e+08	5.22573e+08	5.04703e+08	4.43794e+08	4.53994e+08	4.58951e+08	4.83213e+08	4.25743e+08	4.10238e+08	5.19386e+08	4.65793e+08	4.80243e+08	4.29122e+08	4.67942e+08	28.9291	28.9351	28.7978	28.828	29.0332	28.7379	29.1022	28.9611	28.9109	28.7253	28.7581	28.7738	28.8481	28.6654	28.6119	28.9522	28.7951	28.8392	28.6768	28.8018
Q9CQI3	GMFB_MOUSE	Glia maturation factor beta OS=Mus musculus GN=Gmfb PE=1 SV=3	Gmfb	6.23045e+08	6.25018e+08	4.7517e+08	4.73555e+08	4.77752e+08	3.6566e+08	2.43376e+08	6.46333e+08	3.84214e+08	4.66277e+08	3.98543e+08	4.56684e+08	3.67962e+08	4.55288e+08	3.21334e+08	5.06272e+08	4.62245e+08	6.84945e+08	4.46783e+08	7.20491e+08	29.2148	29.2193	28.8239	28.819	28.8317	28.4459	27.8586	29.2677	28.5173	28.7966	28.5702	28.7666	28.455	28.7622	28.2595	28.9153	28.7841	29.3514	28.735	29.4244
Q8BZQ7	ANC2_MOUSE	Anaphase-promoting complex subunit 2 OS=Mus musculus GN=Anapc2 PE=1 SV=2	Anapc2	4.87912e+08	3.71551e+08	5.04862e+08	6.98957e+08	7.02052e+08	4.55865e+08	4.37079e+08	4.95163e+08	4.46808e+08	3.51818e+08	6.72233e+08	4.68251e+08	3.95418e+08	4.76405e+08	5.67888e+08	4.63619e+08	3.62527e+08	2.99555e+08	5.98852e+08	3.36228e+08	28.862	28.469	28.9113	29.3806	29.387	28.764	28.7033	28.8833	28.7351	28.3903	29.3244	28.8027	28.5588	28.8276	29.081	28.7884	28.4335	28.1582	29.1576	28.3249
Q9DBC7	KAP0_MOUSE	cAMP-dependent protein kinase type I-alpha regulatory subunit OS=Mus musculus GN=Prkar1a PE=1 SV=3	Prkar1a	4.90029e+08	5.38773e+08	4.68476e+08	4.38314e+08	5.05855e+08	4.46842e+08	4.60114e+08	4.88666e+08	5.06205e+08	4.68002e+08	4.59949e+08	4.62219e+08	5.07268e+08	4.71598e+08	4.22291e+08	5.20443e+08	4.60075e+08	5.07202e+08	4.06784e+08	5.10595e+08	28.8683	29.0051	28.8034	28.7074	28.9141	28.7352	28.7774	28.8643	28.9151	28.8019	28.7769	28.784	28.9182	28.813	28.6537	28.9552	28.7773	28.918	28.5997	28.9276
Q8R1F1	NIBL1_MOUSE	Niban-like protein 1 OS=Mus musculus GN=Fam129b PE=1 SV=2	Niban2 Fam129b	5.04072e+08	5.44713e+08	5.16507e+08	5.25025e+08	4.56217e+08	4.6737e+08	5.1649e+08	4.91447e+08	4.12666e+08	4.14644e+08	4.63436e+08	4.38215e+08	4.87962e+08	4.32808e+08	5.09927e+08	4.39282e+08	4.28581e+08	4.95927e+08	4.64439e+08	5.17654e+08	28.9091	29.0209	28.9442	28.9678	28.7651	28.8	28.9442	28.8725	28.6204	28.6273	28.7878	28.7071	28.8622	28.6892	28.9257	28.7106	28.675	28.8856	28.7909	28.9474
P35235	PTN11_MOUSE	Tyrosine-protein phosphatase non-receptor type 11 OS=Mus musculus GN=Ptpn11 PE=1 SV=2	Ptpn11	4.96484e+08	5.45116e+08	5.33588e+08	4.57014e+08	4.20865e+08	4.69535e+08	3.88339e+08	4.62751e+08	4.54674e+08	4.67871e+08	4.43412e+08	4.84274e+08	4.44815e+08	4.81294e+08	4.88388e+08	5.74894e+08	4.15177e+08	5.40199e+08	4.45579e+08	4.96206e+08	28.8872	29.022	28.9912	28.7677	28.6488	28.8067	28.5327	28.7857	28.7603	28.8015	28.7241	28.8512	28.7286	28.8423	28.8635	29.0987	28.6292	29.0089	28.7311	28.8864
P24270	CATA_MOUSE	Catalase OS=Mus musculus GN=Cat PE=1 SV=4	Cat Cas-1 Cas1	5.44119e+08	4.47335e+08	5.95243e+08	5.28689e+08	4.56569e+08	4.25482e+08	4.17782e+08	3.90934e+08	4.98889e+08	4.30284e+08	5.26221e+08	5.03756e+08	5.13328e+08	5.23116e+08	5.71037e+08	4.81316e+08	4.38521e+08	3.52506e+08	4.55516e+08	3.62986e+08	29.0193	28.7368	29.1489	28.9778	28.7663	28.6645	28.6382	28.5423	28.8941	28.6807	28.9711	28.9082	28.9353	28.9626	29.089	28.8424	28.7081	28.3931	28.7629	28.4353
Q3UN16	GP162_MOUSE	Probable G-protein coupled receptor 162 OS=Mus musculus GN=Gpr162 PE=2 SV=2	Gpr162	6.80836e+08	1.54847e+08	8.61252e+08	4.75258e+08	2.48626e+08	4.19893e+08	1.69325e+08	2.47511e+08	5.1504e+08	3.41579e+08	4.34186e+08	8.20748e+08	4.39965e+08	7.3537e+08	6.86295e+08	7.06304e+08	4.94625e+08	2.03385e+08	4.34782e+08	3.9202e+08	29.3427	27.2063	29.6819	28.8241	27.8894	28.6454	27.3352	27.8829	28.9401	28.3476	28.6937	29.6124	28.7128	29.4539	29.3543	29.3957	28.8818	27.5996	28.6957	28.5464
Q8R4V4	CBPZ_MOUSE	Carboxypeptidase Z OS=Mus musculus GN=Cpz PE=2 SV=2	Cpz	4.03063e+08	5.04017e+08	3.46076e+08	5.52184e+08	4.42694e+08	4.44262e+08	5.70002e+08	4.67584e+08	4.09397e+08	5.03225e+08	5.71109e+08	3.52272e+08	3.86727e+08	4.09765e+08	3.78805e+08	3.99833e+08	3.92835e+08	7.32235e+08	5.04382e+08	6.74302e+08	28.5864	28.9089	28.3665	29.0406	28.7217	28.7268	29.0864	28.8007	28.6089	28.9066	29.0892	28.3921	28.5267	28.6102	28.4969	28.5748	28.5493	29.4477	28.9099	29.3288
Q9Z2U1	PSA5_MOUSE	Proteasome subunit alpha type-5 OS=Mus musculus GN=Psma5 PE=1 SV=1	Psma5	5.64097e+08	5.06245e+08	5.82336e+08	5.74199e+08	4.61328e+08	3.86403e+08	3.32913e+08	4.10099e+08	4.34558e+08	4.56408e+08	5.59759e+08	4.93231e+08	4.09651e+08	5.04503e+08	4.70359e+08	4.73303e+08	4.32899e+08	4.38997e+08	4.91509e+08	3.9255e+08	29.0714	28.9153	29.1173	29.097	28.7812	28.5255	28.3106	28.6114	28.695	28.7657	29.0602	28.8777	28.6098	28.9103	28.8092	28.8182	28.6895	28.7096	28.8726	28.5483
Q8BP47	SYNC_MOUSE	Asparagine--tRNA ligase, cytoplasmic OS=Mus musculus GN=Nars PE=1 SV=2	NARS1 Nars	4.93569e+08	5.02152e+08	4.59485e+08	4.29263e+08	4.60089e+08	4.30586e+08	4.51313e+08	4.18665e+08	5.18599e+08	4.63024e+08	4.44677e+08	4.18478e+08	6.0236e+08	4.49712e+08	5.1144e+08	4.97069e+08	5.88939e+08	3.62932e+08	3.93472e+08	4.52239e+08	28.8787	28.9036	28.7754	28.6773	28.7773	28.6817	28.7496	28.6412	28.95	28.7865	28.7282	28.6406	29.1661	28.7444	28.93	28.8889	29.1335	28.4351	28.5517	28.7525
Q61805	LBP_MOUSE	Lipopolysaccharide-binding protein OS=Mus musculus GN=Lbp PE=2 SV=2	Lbp	7.75455e+08	1.10129e+09	6.91884e+08	7.42134e+08	5.09932e+08	4.668e+08	5.66579e+08	8.26633e+08	4.09131e+08	4.14677e+08	2.70089e+08	2.64494e+08	2.90647e+08	2.84159e+08	2.39114e+08	2.95084e+08	2.87016e+08	3.17021e+08	2.57614e+08	3.33476e+08	29.5305	30.0365	29.366	29.4671	28.9257	28.7982	29.0777	29.6227	28.608	28.6274	28.0089	27.9787	28.1147	28.0821	27.8331	28.1365	28.0966	28.24	27.9406	28.313
Q9CWK8	SNX2_MOUSE	Sorting nexin-2 OS=Mus musculus GN=Snx2 PE=1 SV=2	Snx2	4.31153e+08	4.69902e+08	4.45211e+08	4.66135e+08	4.23037e+08	4.42219e+08	4.97932e+08	4.75104e+08	4.56962e+08	4.43028e+08	4.8112e+08	4.30731e+08	4.43523e+08	4.66446e+08	5.17e+08	4.36088e+08	4.46926e+08	5.37957e+08	5.1741e+08	5.10576e+08	28.6836	28.8078	28.7299	28.7962	28.6562	28.7202	28.8914	28.8237	28.7675	28.7228	28.8418	28.6822	28.7244	28.7971	28.9456	28.7	28.7355	29.0029	28.9467	28.9276
Q9QZD9	EIF3I_MOUSE	Eukaryotic translation initiation factor 3 subunit I OS=Mus musculus GN=Eif3i PE=1 SV=1	Eif3i Eif3s2 Trip1	4.94038e+08	4.08247e+08	6.3848e+08	4.30081e+08	3.44556e+08	4.77555e+08	4.34478e+08	3.90279e+08	4.99376e+08	5.03506e+08	4.44842e+08	5.43086e+08	4.39134e+08	5.00086e+08	5.46105e+08	4.26538e+08	4.40447e+08	4.93548e+08	4.0216e+08	4.75904e+08	28.88	28.6049	29.2501	28.68	28.3602	28.8311	28.6947	28.5399	28.8956	28.9074	28.7287	29.0166	28.7101	28.8976	29.0246	28.6681	28.7144	28.8786	28.5832	28.8261
Q9JL26	FMNL_MOUSE	Formin-like protein 1 OS=Mus musculus GN=Fmnl1 PE=1 SV=1	Fmnl1 Frl Frl1	4.19843e+08	4.82398e+08	4.75582e+08	4.68737e+08	4.40231e+08	5.03142e+08	4.98964e+08	4.21945e+08	4.86199e+08	4.95096e+08	5.09673e+08	4.87379e+08	4.75035e+08	4.12509e+08	4.77388e+08	4.47264e+08	4.74518e+08	4.66458e+08	3.95952e+08	4.73832e+08	28.6453	28.8456	28.8251	28.8042	28.7137	28.9064	28.8944	28.6525	28.857	28.8831	28.925	28.8605	28.8235	28.6199	28.8306	28.7366	28.8219	28.7972	28.5608	28.8198
Q9WTS4	TEN1_MOUSE	Teneurin-1 OS=Mus musculus GN=Tenm1 PE=1 SV=1	Tenm1 Odz1 Tnm1	4.21423e+08	3.28575e+08	5.62086e+08	7.73153e+08	7.11684e+08	3.40552e+08	4.15801e+08	2.81455e+08	4.78585e+08	2.50494e+08	6.47798e+08	3.07996e+08	3.4411e+08	4.83691e+08	6.29966e+08	3.63826e+08	5.13609e+08	2.61151e+08	9.37475e+08	2.55801e+08	28.6507	28.2916	29.0662	29.5262	29.4067	28.3433	28.6313	28.0683	28.8342	27.9002	29.271	28.1983	28.3583	28.8495	29.2307	28.4387	28.9361	27.9603	29.8042	27.9304
Q9CXF0	KYNU_MOUSE	Kynureninase OS=Mus musculus GN=Kynu PE=2 SV=3	Kynu	2.36393e+08	2.81767e+08	2.17389e+08	2.66724e+08	3.82832e+08	3.39673e+08	4.77215e+08	4.43356e+08	4.27244e+08	5.02442e+08	4.37864e+08	3.05289e+08	2.55688e+08	4.39661e+08	2.90028e+08	3.58013e+08	7.47345e+08	1.12962e+09	1.05429e+09	6.85107e+08	27.8166	28.0699	27.6957	27.9908	28.5121	28.3396	28.8301	28.7239	28.6705	28.9044	28.7059	28.1856	27.9298	28.7118	28.1116	28.4154	29.4772	30.0732	29.9736	29.3518
P97807	FUMH_MOUSE	Fumarate hydratase, mitochondrial OS=Mus musculus GN=Fh PE=1 SV=3	Fh Fh1	4.71728e+08	4.89143e+08	4.35244e+08	4.14934e+08	4.78308e+08	4.7821e+08	4.85794e+08	5.26287e+08	4.44746e+08	4.26499e+08	4.83983e+08	4.70139e+08	5.40763e+08	4.39453e+08	4.51098e+08	4.47772e+08	4.96669e+08	4.11326e+08	3.98686e+08	4.47773e+08	28.8134	28.8657	28.6972	28.6283	28.8334	28.8331	28.8558	28.9713	28.7284	28.668	28.8504	28.8085	29.0104	28.7111	28.7489	28.7382	28.8877	28.6157	28.5707	28.7382
P26638	SYSC_MOUSE	Serine--tRNA ligase, cytoplasmic OS=Mus musculus GN=Sars PE=2 SV=3	Sars1 Sars Sers	4.70643e+08	4.70906e+08	5.20797e+08	4.83528e+08	4.007e+08	4.65271e+08	4.26359e+08	4.0034e+08	4.397e+08	4.6968e+08	4.4717e+08	4.84013e+08	4.64526e+08	5.01463e+08	5.37846e+08	4.79934e+08	4.19177e+08	4.47761e+08	4.69058e+08	4.36693e+08	28.8101	28.8109	28.9561	28.849	28.5779	28.7935	28.6675	28.5767	28.7119	28.8071	28.7362	28.8505	28.7912	28.9016	29.0026	28.8383	28.643	28.7382	28.8052	28.702
Q6ZPJ0	TEX2_MOUSE	Testis-expressed sequence 2 protein OS=Mus musculus GN=Tex2 PE=1 SV=2	Tex2 Kiaa1738	4.31473e+08	5.89802e+08	4.78029e+08	4.74688e+08	4.86248e+08	4.93097e+08	5.83153e+08	5.23625e+08	3.83894e+08	4.29691e+08	4.21453e+08	4.01513e+08	4.38885e+08	4.42097e+08	4.61861e+08	4.52065e+08	3.85087e+08	4.58299e+08	4.14737e+08	4.08594e+08	28.6847	29.1357	28.8325	28.8224	28.8571	28.8773	29.1193	28.964	28.5161	28.6787	28.6508	28.5809	28.7093	28.7198	28.7829	28.752	28.5206	28.7717	28.6276	28.6061
O35206	COFA1_MOUSE	Collagen alpha-1(XV) chain OS=Mus musculus GN=Col15a1 PE=1 SV=2	Col15a1	5.40414e+08	3.34453e+08	5.91139e+08	5.47981e+08	5.1634e+08	4.01824e+08	3.60169e+08	3.34499e+08	5.34784e+08	3.25357e+08	5.31611e+08	4.95947e+08	4.64181e+08	5.42998e+08	5.55189e+08	5.09882e+08	4.50248e+08	3.00999e+08	4.99518e+08	3.04699e+08	29.0095	28.3172	29.1389	29.0295	28.9437	28.582	28.4241	28.3174	28.9944	28.2774	28.9858	28.8856	28.7901	29.0164	29.0484	28.9256	28.7461	28.1652	28.896	28.1828
Q99MT2	MSH4_MOUSE	MutS protein homolog 4 OS=Mus musculus GN=Msh4 PE=2 SV=1	Msh4	4.3906e+08	4.83005e+08	4.20418e+08	4.17765e+08	4.72775e+08	4.46735e+08	4.71076e+08	4.89715e+08	4.41107e+08	4.62184e+08	4.55188e+08	4.13904e+08	4.85948e+08	5.33306e+08	4.95767e+08	4.94143e+08	4.07716e+08	4.23054e+08	4.60254e+08	4.23378e+08	28.7098	28.8475	28.6472	28.6381	28.8166	28.7348	28.8114	28.8674	28.7166	28.7839	28.7619	28.6247	28.8562	28.9904	28.8851	28.8804	28.603	28.6563	28.7779	28.6574
P57776	EF1D_MOUSE	Elongation factor 1-delta OS=Mus musculus GN=Eef1d PE=1 SV=3	Eef1d	7.74245e+08	7.14558e+08	3.59816e+08	2.13962e+08	4.67539e+08	3.50392e+08	2.29064e+08	4.6244e+08	3.32734e+08	3.76827e+08	2.22697e+08	6.41514e+08	6.3008e+08	4.33614e+08	2.67353e+08	4.96552e+08	7.60579e+08	5.3312e+08	2.27749e+08	6.14772e+08	29.5282	29.4125	28.4227	27.6728	28.8005	28.3844	27.7712	28.7847	28.3098	28.4893	27.7305	29.2569	29.231	28.6918	27.9942	28.8874	29.5025	28.9899	27.7629	29.1955
P48758	CBR1_MOUSE	Carbonyl reductase [NADPH] 1 OS=Mus musculus GN=Cbr1 PE=1 SV=3	Cbr1 Cbr	4.72483e+08	4.61137e+08	4.89447e+08	4.8961e+08	4.43246e+08	4.55059e+08	4.26585e+08	3.98233e+08	4.78527e+08	4.59966e+08	4.71037e+08	4.49772e+08	4.88005e+08	4.94726e+08	4.58642e+08	5.23503e+08	4.16917e+08	3.93605e+08	4.12269e+08	4.14939e+08	28.8157	28.7806	28.8666	28.8671	28.7235	28.7615	28.6683	28.569	28.834	28.777	28.8113	28.7446	28.8623	28.8821	28.7728	28.9636	28.6352	28.5522	28.619	28.6283
P43276	H15_MOUSE	Histone H1.5 OS=Mus musculus GN=Hist1h1b PE=1 SV=2	H1-5 H1f5 Hist1h1b	1.78374e+08	2.93855e+08	1.46169e+08	2.08302e+08	9.99335e+08	7.298e+08	1.1633e+09	1.30114e+09	2.81609e+08	2.72028e+08	2.16933e+08	1.70448e+08	3.04916e+08	3.10546e+08	2.2583e+08	3.44851e+08	3.99611e+08	5.3867e+08	4.82366e+08	4.85318e+08	27.4103	28.1305	27.1231	27.6341	29.8964	29.4429	30.1156	30.2771	28.0691	28.0192	27.6927	27.3448	28.1838	28.2102	27.7507	28.3614	28.574	29.0048	28.8456	28.8544
P70336	ROCK2_MOUSE	Rho-associated protein kinase 2 OS=Mus musculus GN=Rock2 PE=1 SV=1	Rock2	3.26907e+08	7.02853e+08	3.5174e+08	2.61148e+08	3.84802e+08	4.1409e+08	4.88612e+08	6.5099e+08	3.16241e+08	3.37562e+08	3.47421e+08	3.28786e+08	3.17645e+08	4.11362e+08	3.31218e+08	1.03956e+09	2.5627e+08	1.06542e+09	3.91025e+08	3.17744e+08	28.2843	29.3886	28.3899	27.9603	28.5195	28.6254	28.8641	29.2781	28.2365	28.3306	28.3721	28.2926	28.2428	28.6158	28.3032	29.9533	27.9331	29.9888	28.5427	28.2433
Q8VDM4	PSMD2_MOUSE	26S proteasome non-ATPase regulatory subunit 2 OS=Mus musculus GN=Psmd2 PE=1 SV=1	Psmd2	4.34408e+08	4.49347e+08	4.33885e+08	4.66488e+08	4.59233e+08	4.47772e+08	4.87804e+08	4.17128e+08	4.54616e+08	4.60476e+08	4.45251e+08	4.58214e+08	4.44001e+08	4.52379e+08	5.05116e+08	4.63187e+08	4.40825e+08	4.38533e+08	4.43223e+08	4.34166e+08	28.6945	28.7433	28.6927	28.7973	28.7747	28.7382	28.8617	28.6359	28.7601	28.7786	28.73	28.7714	28.726	28.753	28.912	28.787	28.7156	28.7081	28.7235	28.6937
Q3TWW8	SRSF6_MOUSE	Serine/arginine-rich splicing factor 6 OS=Mus musculus GN=Srsf6 PE=1 SV=1	Srsf6 Sfrs6 Srp55	4.71798e+08	4.51367e+08	4.56588e+08	5.09311e+08	4.39867e+08	3.78914e+08	4.61691e+08	3.64154e+08	4.52852e+08	3.68604e+08	4.72928e+08	3.75198e+08	4.4897e+08	5.02102e+08	5.58106e+08	4.66229e+08	4.51146e+08	4.31678e+08	5.10728e+08	4.51555e+08	28.8136	28.7497	28.7663	28.924	28.7125	28.4973	28.7824	28.44	28.7545	28.4575	28.817	28.4831	28.742	28.9034	29.056	28.7965	28.749	28.6854	28.928	28.7503
Q8K2Z2	PRP39_MOUSE	Pre-mRNA-processing factor 39 OS=Mus musculus GN=Prpf39 PE=2 SV=3	Prpf39	4.0669e+08	5.50083e+08	3.87948e+08	5.08765e+08	4.40051e+08	4.36561e+08	4.65363e+08	5.38649e+08	3.53734e+08	3.88203e+08	3.82237e+08	5.35961e+08	4.09032e+08	4.37851e+08	3.75858e+08	4.58053e+08	3.95263e+08	4.99238e+08	4.40018e+08	5.70252e+08	28.5994	29.0351	28.5313	28.9224	28.7131	28.7016	28.7938	29.0048	28.3981	28.5322	28.5099	28.9976	28.6076	28.7059	28.4856	28.7709	28.5582	28.8952	28.713	29.087
Q9JHW9	AL1A3_MOUSE	Aldehyde dehydrogenase family 1 member A3 OS=Mus musculus GN=Aldh1a3 PE=2 SV=1	Aldh1a3 Aldh6 Raldh3	4.9733e+08	4.1348e+08	5.259e+08	5.30959e+08	3.58159e+08	4.58232e+08	4.56087e+08	3.58434e+08	4.97182e+08	5.01061e+08	4.76266e+08	5.04288e+08	3.44475e+08	4.71887e+08	4.90341e+08	4.67182e+08	2.82944e+08	4.50021e+08	4.28279e+08	4.65333e+08	28.8896	28.6232	28.9702	28.984	28.416	28.7715	28.7647	28.4171	28.8892	28.9004	28.8272	28.9097	28.3598	28.8139	28.8692	28.7994	28.0759	28.7454	28.674	28.7937
Q9JLB0	MPP6_MOUSE	MAGUK p55 subfamily member 6 OS=Mus musculus GN=Mpp6 PE=1 SV=1	Mpp6 Dlgh4 Pals2	3.81741e+08	2.23062e+08	2.99869e+08	4.78729e+08	4.17007e+08	3.05243e+08	4.4974e+08	4.2337e+08	6.42286e+08	3.88375e+08	2.92803e+08	5.7899e+08	2.08927e+08	5.10092e+08	5.60734e+08	6.39803e+08	3.74541e+08	3.95757e+08	6.80257e+08	6.21046e+08	28.508	27.7329	28.1598	28.8346	28.6355	28.1854	28.7445	28.6573	29.2586	28.5329	28.1254	29.109	27.6384	28.9262	29.0627	29.2531	28.4806	28.56	29.3415	29.2101
Q9Z1R3	APOM_MOUSE	Apolipoprotein M OS=Mus musculus GN=Apom PE=1 SV=1	Apom Ng20	4.80346e+08	4.82859e+08	5.19498e+08	5.17422e+08	4.52055e+08	4.68305e+08	5.13744e+08	4.85053e+08	4.25524e+08	3.87532e+08	4.43943e+08	4.27374e+08	4.20656e+08	3.7988e+08	4.10808e+08	4.03073e+08	4.32579e+08	4.0202e+08	3.91605e+08	3.8892e+08	28.8395	28.847	28.9525	28.9468	28.7519	28.8029	28.9365	28.8536	28.6647	28.5297	28.7258	28.6709	28.6481	28.501	28.6139	28.5865	28.6884	28.5827	28.5448	28.5349
P61222	ABCE1_MOUSE	ATP-binding cassette sub-family E member 1 OS=Mus musculus GN=Abce1 PE=2 SV=1	Abce1 Rli	4.37707e+08	3.83609e+08	4.34328e+08	4.54211e+08	3.98204e+08	3.91172e+08	4.21543e+08	3.59893e+08	4.39289e+08	4.12678e+08	4.76477e+08	4.55696e+08	4.63217e+08	4.72039e+08	5.45247e+08	4.85427e+08	4.92324e+08	3.93906e+08	4.63986e+08	4.42633e+08	28.7054	28.5151	28.6942	28.7588	28.5689	28.5432	28.6511	28.423	28.7106	28.6204	28.8278	28.7635	28.7871	28.8143	29.0223	28.8547	28.875	28.5533	28.7895	28.7215
Q9CR57	RL14_MOUSE	60S ribosomal protein L14 OS=Mus musculus GN=Rpl14 PE=2 SV=3	Rpl14	3.84509e+08	4.16792e+08	3.4632e+08	2.93674e+08	4.47782e+08	4.22861e+08	3.84599e+08	5.09102e+08	4.60307e+08	4.08524e+08	4.0185e+08	4.45031e+08	4.59703e+08	3.7894e+08	3.56134e+08	3.90963e+08	7.06366e+08	4.74941e+08	5.53769e+08	5.50297e+08	28.5184	28.6348	28.3675	28.1296	28.7382	28.6556	28.5188	28.9234	28.778	28.6058	28.5821	28.7293	28.7761	28.4974	28.4078	28.5425	29.3958	28.8232	29.0447	29.0356
Q924Y0	BODG_MOUSE	Gamma-butyrobetaine dioxygenase OS=Mus musculus GN=Bbox1 PE=2 SV=1	Bbox1	4.8414e+08	4.7425e+08	4.37737e+08	4.71279e+08	4.38819e+08	3.6065e+08	4.00935e+08	3.722e+08	4.38437e+08	4.04313e+08	4.46351e+08	4.34064e+08	4.53264e+08	4.82953e+08	4.56924e+08	4.27499e+08	4.27844e+08	4.15273e+08	5.10282e+08	4.35963e+08	28.8508	28.8211	28.7055	28.812	28.709	28.426	28.5788	28.4715	28.7078	28.5909	28.7336	28.6933	28.7558	28.8473	28.7674	28.6713	28.6725	28.6295	28.9267	28.6996
P97315	CSRP1_MOUSE	Cysteine and glycine-rich protein 1 OS=Mus musculus GN=Csrp1 PE=1 SV=3	Csrp1 Crp1 Csrp	4.40473e+08	3.99634e+08	4.71889e+08	4.77693e+08	5.09924e+08	4.27798e+08	4.78383e+08	4.66217e+08	4.07828e+08	4.11512e+08	4.38291e+08	4.07747e+08	3.8699e+08	4.49544e+08	4.35897e+08	4.76754e+08	4.02788e+08	4.14655e+08	4.87343e+08	3.52373e+08	28.7145	28.5741	28.8139	28.8315	28.9257	28.6724	28.8336	28.7964	28.6034	28.6164	28.7073	28.6031	28.5277	28.7439	28.6994	28.8287	28.5854	28.6273	28.8604	28.3925
Q3TKT4	SMCA4_MOUSE	Transcription activator BRG1 OS=Mus musculus GN=Smarca4 PE=1 SV=1	Smarca4 Baf190a Brg1 Snf2b Snf2l4	4.61438e+08	4.31957e+08	5.14283e+08	4.34827e+08	4.10151e+08	4.604e+08	4.87572e+08	4.9475e+08	3.69335e+08	4.0541e+08	3.75975e+08	4.50951e+08	3.82146e+08	4.38672e+08	4.59193e+08	4.47715e+08	4.25084e+08	3.82209e+08	4.68088e+08	4.29741e+08	28.7816	28.6863	28.938	28.6959	28.6116	28.7783	28.861	28.8821	28.4604	28.5948	28.4861	28.7484	28.5095	28.7086	28.7745	28.738	28.6632	28.5098	28.8022	28.6789
Q6RI63	F120B_MOUSE	Constitutive coactivator of peroxisome proliferator-activated receptor gamma OS=Mus musculus GN=Fam120b PE=1 SV=1	Fam120b Ccpg Kiaa1838	5.16618e+08	2.22673e+08	5.583e+08	5.78124e+08	4.0795e+08	3.83803e+08	1.28859e+08	3.61613e+08	3.67843e+08	2.82336e+08	4.40499e+08	6.36948e+08	4.22654e+08	5.08829e+08	3.39778e+08	4.76621e+08	7.83091e+08	2.15156e+08	6.96952e+08	3.9798e+08	28.9445	27.7304	29.0565	29.1068	28.6038	28.5158	26.9412	28.4299	28.4545	28.0728	28.7146	29.2466	28.6549	28.9226	28.34	28.8283	29.5446	27.6808	29.3765	28.5681
Q69Z28	ATS16_MOUSE	A disintegrin and metalloproteinase with thrombospondin motifs 16 OS=Mus musculus GN=Adamts16 PE=2 SV=2	Adamts16 Kiaa2029	4.04648e+08	5.70123e+08	3.90677e+08	5.18025e+08	4.47601e+08	4.45707e+08	4.79243e+08	4.05296e+08	4.18549e+08	4.8055e+08	4.4499e+08	3.7045e+08	4.49097e+08	4.20356e+08	4.10013e+08	4.21781e+08	3.57275e+08	4.47061e+08	3.94761e+08	4.4224e+08	28.5921	29.0867	28.5414	28.9484	28.7376	28.7315	28.8362	28.5944	28.6408	28.8401	28.7292	28.4647	28.7425	28.647	28.6111	28.6519	28.4125	28.7359	28.5564	28.7203
Q8CFE6	S38A2_MOUSE	Sodium-coupled neutral amino acid transporter 2 OS=Mus musculus GN=Slc38a2 PE=1 SV=1	Slc38a2 Ata2 Kiaa1382 Sat2 Snat2	3.53634e+08	4.47615e+08	3.21052e+08	4.60675e+08	6.76374e+08	5.71831e+08	7.26028e+08	6.51691e+08	4.34063e+08	5.84813e+08	4.67486e+08	4.38183e+08	2.86857e+08	2.42649e+08	2.28462e+08	2.34901e+08	3.77761e+08	3.69363e+08	3.681e+08	4.60642e+08	28.3977	28.7377	28.2582	28.7792	29.3332	29.091	29.4354	29.2796	28.6933	29.1234	28.8003	28.707	28.0958	27.8543	27.7674	27.8075	28.4929	28.4605	28.4555	28.7791
P09041	PGK2_MOUSE	Phosphoglycerate kinase 2 OS=Mus musculus GN=Pgk2 PE=1 SV=4	Pgk2 Pgk-2	4.46576e+08	4.34877e+08	4.47146e+08	4.42417e+08	3.80861e+08	4.78994e+08	4.22118e+08	3.91888e+08	4.37144e+08	4.39519e+08	4.29652e+08	4.59732e+08	4.6786e+08	4.58898e+08	4.39515e+08	4.6246e+08	3.76649e+08	4.34986e+08	3.76689e+08	4.59043e+08	28.7343	28.696	28.7362	28.7208	28.5047	28.8354	28.6531	28.5459	28.7035	28.7114	28.6786	28.7762	28.8015	28.7736	28.7113	28.7848	28.4886	28.6964	28.4888	28.7741
Q9Z1T1	AP3B1_MOUSE	AP-3 complex subunit beta-1 OS=Mus musculus GN=Ap3b1 PE=1 SV=2	Ap3b1	4.65884e+08	4.87588e+08	4.44209e+08	4.18985e+08	3.62981e+08	4.20464e+08	3.99204e+08	4.08098e+08	4.29344e+08	4.08711e+08	4.24784e+08	4.32922e+08	4.58423e+08	4.49726e+08	4.62923e+08	4.56393e+08	3.93064e+08	4.80058e+08	3.89474e+08	4.60938e+08	28.7954	28.8611	28.7267	28.6423	28.4353	28.6474	28.5726	28.6043	28.6776	28.6065	28.6622	28.6895	28.7721	28.7445	28.7862	28.7657	28.5502	28.8386	28.537	28.78
Q99P72	RTN4_MOUSE	Reticulon-4 OS=Mus musculus GN=Rtn4 PE=1 SV=2	Rtn4 Kiaa0886 Nogo	2.37427e+08	2.92366e+08	2.04979e+08	2.58571e+08	2.42331e+08	2.25728e+08	2.83646e+08	2.96828e+08	5.26075e+08	5.56785e+08	5.26177e+08	4.22945e+08	5.08066e+08	4.6654e+08	4.26702e+08	4.75453e+08	6.44099e+08	6.71797e+08	6.9086e+08	6.81034e+08	27.8229	28.1232	27.6109	27.946	27.8524	27.75	28.0795	28.1451	28.9707	29.0525	28.971	28.6559	28.9204	28.7974	28.6687	28.8247	29.2627	29.3234	29.3638	29.3432
P41216	ACSL1_MOUSE	Long-chain-fatty-acid--CoA ligase 1 OS=Mus musculus GN=Acsl1 PE=1 SV=2	Acsl1 Acsl2 Facl2	4.96465e+08	3.72879e+08	4.72412e+08	4.86951e+08	4.7863e+08	4.73683e+08	2.89408e+08	5.53165e+08	4.48914e+08	3.30998e+08	4.64278e+08	5.18e+08	4.54105e+08	4.93836e+08	4.36104e+08	4.73346e+08	4.18312e+08	2.65306e+08	3.6463e+08	3.32732e+08	28.8871	28.4741	28.8155	28.8592	28.8343	28.8193	28.1085	29.0431	28.7419	28.3022	28.7904	28.9484	28.7585	28.8795	28.7001	28.8183	28.64	27.9831	28.4419	28.3098
P42208	SEPT2_MOUSE	Septin-2 OS=Mus musculus GN=Sept2 PE=1 SV=2	Septin2 Nedd5 Sept2	4.25082e+08	4.35452e+08	4.45786e+08	4.32474e+08	3.9592e+08	4.28331e+08	4.23938e+08	4.09761e+08	4.55594e+08	4.51018e+08	4.30388e+08	4.31062e+08	4.23729e+08	4.59622e+08	4.7167e+08	4.56748e+08	4.09157e+08	4.01507e+08	3.97624e+08	4.36652e+08	28.6632	28.6979	28.7318	28.688	28.5606	28.6741	28.6593	28.6102	28.7632	28.7486	28.6811	28.6833	28.6586	28.7759	28.8132	28.7668	28.6081	28.5809	28.5668	28.7019
P47877	IBP2_MOUSE	Insulin-like growth factor-binding protein 2 OS=Mus musculus GN=Igfbp2 PE=2 SV=2	Igfbp2 Igfbp-2	5.11144e+08	4.30747e+08	4.30829e+08	4.45731e+08	5.06233e+08	4.20135e+08	3.35685e+08	4.05144e+08	4.23229e+08	5.95085e+08	4.3599e+08	6.45012e+08	3.47092e+08	4.13124e+08	3.49894e+08	5.86505e+08	4.0661e+08	3.75379e+08	2.96365e+08	2.59706e+08	28.9292	28.6823	28.6825	28.7316	28.9152	28.6463	28.3225	28.5939	28.6569	29.1485	28.6997	29.2647	28.3707	28.622	28.3823	29.1276	28.5991	28.4838	28.1428	27.9523
P58501	PAXB1_MOUSE	PAX3- and PAX7-binding protein 1 OS=Mus musculus GN=Paxbp1 PE=1 SV=3	Paxbp1 Gcfc Gcfc1	4.15329e+08	3.98824e+08	4.30826e+08	4.40745e+08	3.66257e+08	4.14467e+08	6.43239e+08	3.82953e+08	4.01586e+08	3.88324e+08	3.90495e+08	4.47386e+08	4.02489e+08	4.36203e+08	5.63304e+08	5.15775e+08	3.34351e+08	4.3504e+08	3.85721e+08	4.24803e+08	28.6297	28.5712	28.6825	28.7154	28.4483	28.6267	29.2608	28.5126	28.5811	28.5327	28.5407	28.7369	28.5844	28.7004	29.0693	28.9422	28.3168	28.6966	28.523	28.6622
Q4VA61	DSCL1_MOUSE	Down syndrome cell adhesion molecule-like protein 1 homolog OS=Mus musculus GN=Dscaml1 PE=1 SV=2	Dscaml1	3.92973e+08	4.38435e+08	4.01501e+08	4.55589e+08	4.04511e+08	3.81601e+08	4.27359e+08	3.8848e+08	4.38462e+08	4.5766e+08	3.98904e+08	4.45596e+08	4.50876e+08	4.43245e+08	3.93646e+08	4.46675e+08	4.28464e+08	4.57611e+08	4.32974e+08	5.03265e+08	28.5499	28.7078	28.5808	28.7632	28.5916	28.5075	28.6709	28.5333	28.7079	28.7697	28.5715	28.7312	28.7482	28.7235	28.5523	28.7346	28.6746	28.7695	28.6897	28.9067
Q99KD5	UN45A_MOUSE	Protein unc-45 homolog A OS=Mus musculus GN=Unc45a PE=1 SV=2	Unc45a Smap1	3.9525e+08	4.54773e+08	3.39501e+08	3.58809e+08	5.52221e+08	4.26329e+08	4.02697e+08	5.02202e+08	3.99951e+08	4.00651e+08	3.80872e+08	4.02594e+08	3.82637e+08	3.89176e+08	3.60558e+08	3.88613e+08	4.26213e+08	5.09804e+08	5.62458e+08	5.48814e+08	28.5582	28.7606	28.3388	28.4186	29.0407	28.6674	28.5851	28.9037	28.5752	28.5778	28.5047	28.5848	28.5114	28.5358	28.4257	28.5338	28.667	28.9254	29.0672	29.0317
Q9QYB1	CLIC4_MOUSE	Chloride intracellular channel protein 4 OS=Mus musculus GN=Clic4 PE=1 SV=3	Clic4	4.33013e+08	3.89767e+08	4.4558e+08	4.3637e+08	5.52191e+08	4.28519e+08	4.305e+08	3.95865e+08	4.39606e+08	4.42891e+08	4.18353e+08	4.25578e+08	4.04832e+08	4.22394e+08	4.32421e+08	4.09246e+08	4.24427e+08	3.58241e+08	3.77006e+08	4.02719e+08	28.6898	28.538	28.7311	28.701	29.0406	28.6748	28.6814	28.5604	28.7116	28.7224	28.6401	28.6648	28.5927	28.654	28.6879	28.6084	28.6609	28.4164	28.49	28.5852
O09173	HGD_MOUSE	Homogentisate 1,2-dioxygenase OS=Mus musculus GN=Hgd PE=1 SV=2	Hgd Aku Hgo	6.12862e+08	3.84234e+08	5.85006e+08	4.82026e+08	4.12201e+08	4.09363e+08	3.35622e+08	4.15821e+08	3.90397e+08	3.42077e+08	3.75589e+08	4.7786e+08	4.50279e+08	4.43538e+08	4.08795e+08	4.58232e+08	3.95599e+08	3.19938e+08	4.03037e+08	3.55198e+08	29.191	28.5174	29.1239	28.8445	28.6188	28.6088	28.3223	28.6314	28.5404	28.3497	28.4846	28.832	28.7462	28.7245	28.6068	28.7715	28.5595	28.2532	28.5863	28.404
P46467	VPS4B_MOUSE	Vacuolar protein sorting-associated protein 4B OS=Mus musculus GN=Vps4b PE=1 SV=2	Vps4b Skd1	3.97175e+08	4.14335e+08	3.86318e+08	4.50128e+08	4.576e+08	4.33656e+08	4.50956e+08	4.28761e+08	4.42882e+08	4.70916e+08	4.62749e+08	4.05093e+08	3.97293e+08	3.5407e+08	3.72879e+08	3.02097e+08	4.23861e+08	4.17886e+08	4.53994e+08	4.7703e+08	28.5652	28.6262	28.5252	28.7458	28.7695	28.692	28.7484	28.6756	28.7223	28.8109	28.7857	28.5937	28.5656	28.3995	28.4741	28.1704	28.659	28.6385	28.7581	28.8295
Q8BIK6	TMPS7_MOUSE	Transmembrane protease serine 7 OS=Mus musculus GN=Tmprss7 PE=1 SV=3	Tmprss7	4.58478e+08	5.10212e+08	4.17425e+08	4.43205e+08	4.57986e+08	4.27336e+08	4.32421e+08	5.05609e+08	4.04967e+08	4.33042e+08	3.40573e+08	3.85311e+08	4.31587e+08	4.3194e+08	3.4976e+08	4.34734e+08	3.57034e+08	3.67212e+08	3.53828e+08	4.00448e+08	28.7723	28.9265	28.6369	28.7234	28.7707	28.6708	28.6879	28.9134	28.5932	28.6899	28.3434	28.5214	28.6851	28.6863	28.3818	28.6956	28.4115	28.452	28.3985	28.577
P30412	PPIC_MOUSE	Peptidyl-prolyl cis-trans isomerase C OS=Mus musculus GN=Ppic PE=1 SV=1	Ppic Cypc	3.66458e+08	3.93706e+08	3.4557e+08	4.12872e+08	3.73777e+08	3.69696e+08	3.62875e+08	3.51455e+08	4.17742e+08	4.33128e+08	4.0501e+08	3.91537e+08	4.19026e+08	5.18047e+08	5.0522e+08	4.81042e+08	3.43e+08	4.65687e+08	4.83556e+08	4.77974e+08	28.4491	28.5525	28.3644	28.6211	28.4776	28.4618	28.4349	28.3888	28.638	28.6902	28.5934	28.5446	28.6425	28.9485	28.9123	28.8416	28.3536	28.7948	28.8491	28.8324
P99024	TBB5_MOUSE	Tubulin beta-5 chain OS=Mus musculus GN=Tubb5 PE=1 SV=1	Tubb5	5.14013e+08	2.83019e+08	4.9586e+08	4.27674e+08	3.56407e+08	3.55722e+08	2.99954e+08	3.88245e+08	4.35595e+08	2.99511e+08	4.11684e+08	5.07811e+08	5.48633e+08	5.01359e+08	4.54401e+08	5.0748e+08	5.15138e+08	2.58356e+08	4.49336e+08	3.05595e+08	28.9372	28.0763	28.8854	28.6719	28.4089	28.4062	28.1602	28.5324	28.6984	28.158	28.617	28.9197	29.0313	28.9013	28.7594	28.9188	28.9404	27.9448	28.7432	28.187
P63158	HMGB1_MOUSE	High mobility group protein B1 OS=Mus musculus GN=Hmgb1 PE=1 SV=2	Hmgb1 Hmg-1 Hmg1	5.4018e+08	7.40575e+08	5.47254e+08	5.88443e+08	2.82391e+08	2.86821e+08	3.3054e+08	3.20512e+08	3.0265e+08	3.10093e+08	3.08628e+08	2.82074e+08	4.18667e+08	4.19982e+08	3.47889e+08	4.12803e+08	3.59029e+08	5.70259e+08	5.68985e+08	3.63625e+08	29.0089	29.4641	29.0276	29.1323	28.0731	28.0956	28.3002	28.2558	28.1731	28.2081	28.2013	28.0715	28.6412	28.6458	28.3741	28.6209	28.4195	29.087	29.0838	28.4379
Q91XL3	UXS1_MOUSE	UDP-glucuronic acid decarboxylase 1 OS=Mus musculus GN=Uxs1 PE=2 SV=1	Uxs1	4.44256e+08	3.56357e+08	4.12672e+08	3.35732e+08	4.0546e+08	5.14956e+08	3.74886e+08	5.71945e+08	4.76529e+08	4.87631e+08	3.26715e+08	5.38365e+08	4.40397e+08	3.68598e+08	3.60425e+08	3.58815e+08	3.8784e+08	4.01483e+08	3.2631e+08	3.81981e+08	28.7268	28.4087	28.6204	28.3227	28.595	28.9399	28.4819	29.0913	28.828	28.8612	28.2835	29.004	28.7142	28.4575	28.4251	28.4187	28.5309	28.5808	28.2817	28.5089
Q9DBT5	AMPD2_MOUSE	AMP deaminase 2 OS=Mus musculus GN=Ampd2 PE=1 SV=1	Ampd2	5.07333e+08	4.40706e+08	4.88967e+08	3.5347e+08	3.74686e+08	4.54012e+08	4.82641e+08	4.11987e+08	4.14109e+08	4.20684e+08	3.92923e+08	4.32346e+08	4.12247e+08	3.51299e+08	4.99212e+08	3.78796e+08	3.61649e+08	4.35442e+08	2.80184e+08	3.64926e+08	28.9184	28.7152	28.8652	28.397	28.4811	28.7582	28.8464	28.618	28.6254	28.6482	28.5497	28.6876	28.6189	28.3881	28.8951	28.4968	28.43	28.6979	28.0618	28.443
Q8K1I3	SPP24_MOUSE	Secreted phosphoprotein 24 OS=Mus musculus GN=Spp2 PE=1 SV=2	Spp2 Spp24	4.60849e+08	5.77461e+08	4.72059e+08	4.16295e+08	3.7391e+08	4.75745e+08	3.90245e+08	3.84721e+08	3.49107e+08	4.40889e+08	4.29748e+08	4.29179e+08	3.36458e+08	3.31652e+08	3.16409e+08	3.83996e+08	4.18651e+08	4.25272e+08	3.67225e+08	4.48804e+08	28.7797	29.1051	28.8144	28.633	28.4781	28.8256	28.5398	28.5192	28.3791	28.7158	28.6789	28.677	28.3259	28.3051	28.2372	28.5165	28.6412	28.6638	28.4521	28.7415
Q5DTT1	K2022_MOUSE	Uncharacterized protein KIAA2022 OS=Mus musculus GN=Kiaa2022 PE=2 SV=3	Nexmif Kiaa2022	4.71643e+08	4.45552e+08	4.75589e+08	4.19167e+08	3.99063e+08	3.39439e+08	3.25262e+08	3.80107e+08	4.1505e+08	3.53725e+08	3.30294e+08	4.52302e+08	4.30246e+08	4.59141e+08	4.31711e+08	4.60426e+08	4.1803e+08	3.83507e+08	3.96106e+08	3.90248e+08	28.8131	28.731	28.8251	28.643	28.572	28.3386	28.277	28.5018	28.6287	28.3981	28.2992	28.7527	28.6806	28.7744	28.6855	28.7784	28.639	28.5147	28.5613	28.5398
P08122	CO4A2_MOUSE	Collagen alpha-2(IV) chain OS=Mus musculus GN=Col4a2 PE=2 SV=4	Col4a2	2.55534e+08	1.47544e+08	2.59884e+08	1.91885e+08	1.55291e+08	1.91666e+08	2.33842e+08	1.84262e+08	1.95727e+08	1.93511e+08	3.31299e+08	3.46174e+08	5.47798e+08	6.44146e+08	7.16876e+08	5.95415e+08	1.1376e+09	5.02449e+08	7.71521e+08	5.50787e+08	27.9289	27.1366	27.9533	27.5157	27.2104	27.514	27.801	27.4572	27.5443	27.5278	28.3036	28.3669	29.0291	29.2628	29.4171	29.1493	30.0833	28.9044	29.5231	29.0369
Q8CIZ8	VWF_MOUSE	von Willebrand factor OS=Mus musculus GN=Vwf PE=1 SV=2	Vwf	4.57512e+08	4.57329e+08	5.00879e+08	4.09056e+08	4.30233e+08	4.63615e+08	4.29635e+08	4.49481e+08	4.68056e+08	4.81457e+08	3.68896e+08	4.0995e+08	3.72616e+08	3.10751e+08	3.11421e+08	3.88024e+08	3.60011e+08	3.77808e+08	2.76765e+08	4.20567e+08	28.7692	28.7687	28.8999	28.6077	28.6805	28.7884	28.6785	28.7437	28.8021	28.8428	28.4586	28.6109	28.4731	28.2112	28.2143	28.5316	28.4235	28.4931	28.0441	28.6478
Q9Z1N5	DX39B_MOUSE	Spliceosome RNA helicase Ddx39b OS=Mus musculus GN=Ddx39b PE=1 SV=1	Ddx39b Bat1 Bat1a Uap56	4.00705e+08	3.94763e+08	4.13188e+08	4.20873e+08	3.78462e+08	3.98988e+08	3.9045e+08	3.74211e+08	4.18921e+08	4.11648e+08	4.53802e+08	3.86671e+08	3.97551e+08	4.32553e+08	4.50405e+08	4.11694e+08	3.971e+08	3.89419e+08	4.03367e+08	4.07424e+08	28.578	28.5564	28.6222	28.6488	28.4956	28.5718	28.5406	28.4793	28.6421	28.6168	28.7575	28.5265	28.5666	28.6883	28.7466	28.617	28.5649	28.5367	28.5875	28.602
Q6NZK5	K1328_MOUSE	Uncharacterized protein KIAA1328 OS=Mus musculus GN=Kiaa1328 PE=2 SV=2	Kiaa1328	4.74586e+08	4.08719e+08	5.20581e+08	4.10954e+08	3.73536e+08	4.66708e+08	4.00738e+08	4.03297e+08	3.96542e+08	4.1217e+08	4.27468e+08	4.45565e+08	3.59784e+08	3.67967e+08	4.5245e+08	3.95077e+08	3.60453e+08	3.86678e+08	3.15584e+08	3.39562e+08	28.8221	28.6065	28.9555	28.6144	28.4767	28.7979	28.5781	28.5873	28.5629	28.6187	28.6712	28.7311	28.4226	28.455	28.7532	28.5576	28.4252	28.5266	28.2335	28.3391
P14115	RL27A_MOUSE	60S ribosomal protein L27a OS=Mus musculus GN=Rpl27a PE=2 SV=5	Rpl27a	3.44092e+08	3.17363e+08	3.18047e+08	3.58628e+08	3.99308e+08	4.12994e+08	4.37238e+08	4.35189e+08	3.92788e+08	3.72663e+08	3.99161e+08	3.65907e+08	3.7057e+08	3.44838e+08	3.89183e+08	3.58998e+08	4.9058e+08	5.30157e+08	5.53218e+08	5.18553e+08	28.3582	28.2416	28.2447	28.4179	28.5729	28.6215	28.7038	28.6971	28.5492	28.4733	28.5724	28.4469	28.4652	28.3613	28.5359	28.4194	28.8699	28.9818	29.0433	28.9499
Q9JM52	MINK1_MOUSE	Misshapen-like kinase 1 OS=Mus musculus GN=Mink1 PE=1 SV=3	Mink1 Map4k6 Mink	3.54187e+08	4.76248e+08	4.66148e+08	4.25648e+08	3.71925e+08	4.31831e+08	4.86182e+08	4.42081e+08	3.24137e+08	4.26135e+08	3.35111e+08	3.78284e+08	3.29427e+08	3.9266e+08	3.87986e+08	3.79318e+08	3.55533e+08	4.57055e+08	4.13277e+08	4.65397e+08	28.3999	28.8271	28.7962	28.6651	28.4704	28.6859	28.8569	28.7197	28.272	28.6667	28.3201	28.4949	28.2954	28.5487	28.5314	28.4988	28.4054	28.7678	28.6225	28.7939
P12970	RL7A_MOUSE	60S ribosomal protein L7a OS=Mus musculus GN=Rpl7a PE=2 SV=2	Rpl7a Surf-3 Surf3	3.25137e+08	3.27158e+08	2.72299e+08	2.92364e+08	4.46042e+08	4.30839e+08	4.40776e+08	5.48837e+08	3.75603e+08	3.75773e+08	3.39191e+08	3.48786e+08	3.46704e+08	3.70244e+08	2.97615e+08	3.62991e+08	5.69876e+08	5.25338e+08	5.54635e+08	5.34318e+08	28.2765	28.2854	28.0206	28.1232	28.7326	28.6826	28.7155	29.0318	28.4846	28.4853	28.3375	28.3778	28.3691	28.4639	28.1489	28.4354	29.0861	28.9687	29.047	28.9931
O70576	STAG3_MOUSE	Cohesin subunit SA-3 OS=Mus musculus GN=Stag3 PE=1 SV=2	Stag3	3.99822e+08	4.2725e+08	4.61109e+08	4.49115e+08	3.78852e+08	4.29935e+08	3.84711e+08	3.63639e+08	4.04575e+08	4.389e+08	4.14601e+08	3.97082e+08	3.87427e+08	4.06213e+08	4.03657e+08	4.07085e+08	3.45808e+08	4.01344e+08	3.66841e+08	4.01461e+08	28.5748	28.6705	28.7805	28.7425	28.4971	28.6795	28.5192	28.4379	28.5918	28.7093	28.6271	28.5649	28.5293	28.5977	28.5886	28.6008	28.3654	28.5803	28.4506	28.5807
P01902	HA1D_MOUSE	H-2 class I histocompatibility antigen, K-D alpha chain OS=Mus musculus GN=H2-K1 PE=1 SV=1	H2-K1 H2-K	3.04409e+08	3.37898e+08	3.04432e+08	3.47398e+08	4.85299e+08	4.59825e+08	5.86341e+08	4.95593e+08	3.78735e+08	4.04032e+08	4.5437e+08	3.67256e+08	3.72003e+08	3.41619e+08	5.21166e+08	3.36415e+08	3.96696e+08	3.94131e+08	3.9204e+08	3.88974e+08	28.1814	28.332	28.1815	28.372	28.8543	28.7765	29.1272	28.8846	28.4966	28.5899	28.7593	28.4522	28.4707	28.3478	28.9572	28.3257	28.5635	28.5541	28.5464	28.5351
B2RQC6	PYR1_MOUSE	CAD protein OS=Mus musculus GN=Cad PE=2 SV=1	Cad	4.11952e+08	3.46338e+08	4.14455e+08	3.87195e+08	4.05246e+08	3.99922e+08	4.16212e+08	4.3593e+08	3.99849e+08	3.39327e+08	3.98954e+08	4.0189e+08	4.24695e+08	4.39143e+08	4.42787e+08	3.94545e+08	4.25978e+08	3.51393e+08	4.10951e+08	4.06192e+08	28.6179	28.3676	28.6266	28.5285	28.5942	28.5751	28.6327	28.6995	28.5749	28.3381	28.5716	28.5822	28.6619	28.7101	28.722	28.5556	28.6662	28.3885	28.6144	28.5976
P47753	CAZA1_MOUSE	F-actin-capping protein subunit alpha-1 OS=Mus musculus GN=Capza1 PE=1 SV=4	Capza1 Cappa1	3.36949e+08	3.62092e+08	3.7701e+08	3.8018e+08	3.99929e+08	4.41006e+08	4.72724e+08	3.77811e+08	4.13624e+08	4.25514e+08	4.07795e+08	3.72894e+08	4.045e+08	3.9924e+08	4.65838e+08	3.99979e+08	3.55027e+08	4.35685e+08	3.93133e+08	4.06402e+08	28.328	28.4318	28.49	28.5021	28.5752	28.7162	28.8164	28.4931	28.6237	28.6646	28.6033	28.4742	28.5916	28.5727	28.7953	28.5753	28.4034	28.6987	28.5504	28.5983
Q60605	MYL6_MOUSE	Myosin light polypeptide 6 OS=Mus musculus GN=Myl6 PE=1 SV=3	Myl6 Myln	3.80685e+08	4.43005e+08	3.40807e+08	4.05481e+08	3.85183e+08	3.76087e+08	3.83633e+08	3.84318e+08	4.06016e+08	4.39591e+08	4.03302e+08	3.70211e+08	4.02225e+08	3.93525e+08	3.68e+08	3.86401e+08	4.12398e+08	4.56424e+08	4.30173e+08	4.49657e+08	28.504	28.7227	28.3444	28.5951	28.521	28.4865	28.5151	28.5177	28.597	28.7116	28.5873	28.4638	28.5834	28.5519	28.4551	28.5255	28.6195	28.7658	28.6803	28.7443
Q925F3	R144A_MOUSE	Probable E3 ubiquitin-protein ligase RNF144A OS=Mus musculus GN=Rnf144a PE=1 SV=1	Rnf144a Kiaa0161 Rnf144 Ubce7ip4 Uip4	4.14413e+08	4.34071e+08	5.29242e+08	3.38844e+08	4.33226e+08	4.78217e+08	3.07437e+08	3.31966e+08	3.39826e+08	4.10418e+08	3.80904e+08	4.60164e+08	3.21771e+08	4.3048e+08	3.67688e+08	4.95646e+08	3.83612e+08	4.50235e+08	3.8828e+08	3.14066e+08	28.6265	28.6934	28.9794	28.336	28.6905	28.8331	28.1957	28.3065	28.3402	28.6125	28.5049	28.7776	28.2615	28.6814	28.4539	28.8847	28.5151	28.7461	28.5325	28.2265
Q9WTY4	AQP5_MOUSE	Aquaporin-5 OS=Mus musculus GN=Aqp5 PE=2 SV=1	Aqp5	4.15483e+08	5.65803e+08	3.31945e+08	4.58201e+08	3.71383e+08	3.28299e+08	3.52278e+08	3.5702e+08	3.57389e+08	4.31624e+08	3.5005e+08	3.49114e+08	3.82209e+08	3.33164e+08	3.05751e+08	3.21584e+08	4.45439e+08	5.12769e+08	4.9437e+08	5.46563e+08	28.6302	29.0757	28.3064	28.7714	28.4683	28.2904	28.3921	28.4114	28.4129	28.6852	28.383	28.3791	28.5098	28.3117	28.1878	28.2606	28.7307	28.9337	28.881	29.0258
Q9QUM0	ITA2B_MOUSE	Integrin alpha-IIb OS=Mus musculus GN=Itga2b PE=1 SV=2	Itga2b	4.36053e+08	3.61176e+08	4.9003e+08	3.89846e+08	3.40495e+08	3.65867e+08	3.43305e+08	3.73756e+08	4.23923e+08	3.76642e+08	3.93391e+08	4.62633e+08	4.01429e+08	3.88193e+08	4.51402e+08	3.83028e+08	3.70882e+08	3.62317e+08	4.42212e+08	3.8916e+08	28.6999	28.4281	28.8683	28.5383	28.3431	28.4467	28.3549	28.4775	28.6592	28.4886	28.5514	28.7853	28.5806	28.5322	28.7498	28.5129	28.4664	28.4327	28.7202	28.5358
O54754	AOXA_MOUSE	Aldehyde oxidase 1 OS=Mus musculus GN=Aox1 PE=1 SV=2	Aox1 Ao Ro	4.45157e+08	4.99091e+08	3.77013e+08	4.7388e+08	3.91874e+08	3.38053e+08	3.46748e+08	5.1279e+08	3.36276e+08	3.85314e+08	3.55835e+08	3.78286e+08	3.66338e+08	3.72282e+08	3.62257e+08	4.04661e+08	3.84904e+08	4.16659e+08	3.61712e+08	4.22894e+08	28.7297	28.8947	28.49	28.8199	28.5458	28.3327	28.3693	28.9338	28.3251	28.5215	28.4066	28.4949	28.4486	28.4718	28.4324	28.5921	28.5199	28.6343	28.4303	28.6557
Q9Z1R2	BAG6_MOUSE	Large proline-rich protein BAG6 OS=Mus musculus GN=Bag6 PE=1 SV=1	Bag6 Bat3	4.11186e+08	5.1384e+08	3.74193e+08	4.12172e+08	4.90003e+08	3.94876e+08	2.85905e+08	3.70157e+08	4.16587e+08	4.85205e+08	3.57408e+08	3.67203e+08	3.35273e+08	4.02391e+08	2.53798e+08	5.44443e+08	3.0636e+08	4.04654e+08	3.72798e+08	4.1991e+08	28.6152	28.9367	28.4792	28.6187	28.8682	28.5568	28.091	28.4636	28.634	28.854	28.413	28.452	28.3208	28.584	27.9191	29.0202	28.1907	28.5921	28.4738	28.6455
P53994	RAB2A_MOUSE	Ras-related protein Rab-2A OS=Mus musculus GN=Rab2a PE=1 SV=1	Rab2a Rab2	3.5945e+08	3.29968e+08	3.47791e+08	3.53142e+08	3.53917e+08	3.43565e+08	3.84817e+08	3.04052e+08	4.36304e+08	4.03094e+08	4.19394e+08	4.06249e+08	4.31131e+08	4.26819e+08	4.27597e+08	4.4183e+08	4.18989e+08	4.21282e+08	4.88466e+08	4.13725e+08	28.4212	28.2978	28.3736	28.3957	28.3988	28.356	28.5196	28.1797	28.7008	28.5865	28.6437	28.5978	28.6836	28.669	28.6717	28.7189	28.6423	28.6502	28.8637	28.6241
Q8CDA1	SAC2_MOUSE	Phosphatidylinositide phosphatase SAC2 OS=Mus musculus GN=Inpp5f PE=1 SV=1	Inpp5f Kiaa0966 Sac2	3.92746e+08	3.92313e+08	4.3008e+08	4.07255e+08	3.28239e+08	3.68496e+08	3.93481e+08	3.47497e+08	4.2331e+08	3.75693e+08	4.38568e+08	3.98263e+08	4.68092e+08	4.08099e+08	4.68106e+08	4.05959e+08	4.14506e+08	3.38684e+08	3.83797e+08	3.23845e+08	28.549	28.5474	28.68	28.6014	28.2902	28.4571	28.5517	28.3724	28.6571	28.485	28.7082	28.5691	28.8022	28.6043	28.8023	28.5968	28.6268	28.3354	28.5158	28.2707
Q76LL6	FHOD3_MOUSE	FH1/FH2 domain-containing protein 3 OS=Mus musculus GN=Fhod3 PE=1 SV=1	Fhod3 Fhos2 Kiaa1695	8.7463e+08	3.11674e+07	9.80896e+08	2.54097e+08	2.44514e+08	4.83443e+07	1.07995e+07	1.55606e+08	4.13435e+08	7.49944e+06	5.07106e+08	1.02405e+09	6.41321e+08	6.91624e+08	6.80336e+08	4.27718e+08	4.49222e+08	1.61643e+07	4.23479e+08	7.76569e+06	29.7041	24.8935	29.8695	27.9208	27.8653	25.5268	23.3645	27.2133	28.6231	22.8384	28.9177	29.9316	29.2565	29.3654	29.3417	28.6721	28.7429	23.9463	28.6577	22.8887
Q6PAL1	DRAXI_MOUSE	Draxin OS=Mus musculus GN=Draxin PE=1 SV=2	Draxin	3.50589e+08	5.20744e+08	3.5553e+08	4.13047e+08	4.86038e+08	4.89686e+08	5.41189e+08	5.34661e+08	3.5001e+08	4.17193e+08	3.53479e+08	3.06204e+08	3.40391e+08	3.82658e+08	2.83292e+08	4.29413e+08	2.75175e+08	3.4702e+08	3.29598e+08	3.82948e+08	28.3852	28.956	28.4054	28.6217	28.8565	28.8673	29.0116	28.994	28.3828	28.6361	28.3971	28.1899	28.3426	28.5115	28.0777	28.6778	28.0358	28.3704	28.2961	28.5126
Q8BT07	CEP55_MOUSE	Centrosomal protein of 55 kDa OS=Mus musculus GN=Cep55 PE=1 SV=2	Cep55	3.40676e+08	3.80689e+08	3.09003e+08	3.58652e+08	3.57691e+08	3.3619e+08	3.62455e+08	3.06663e+08	4.21598e+08	4.43684e+08	4.71034e+08	3.9233e+08	4.33814e+08	3.98863e+08	4.55132e+08	4.03353e+08	3.52936e+08	4.24803e+08	4.41641e+08	4.52951e+08	28.3438	28.504	28.203	28.418	28.4141	28.3247	28.4332	28.1921	28.6513	28.725	28.8113	28.5475	28.6925	28.5713	28.7617	28.5875	28.3948	28.6622	28.7183	28.7548
Q9EPR5	SORC2_MOUSE	VPS10 domain-containing receptor SorCS2 OS=Mus musculus GN=Sorcs2 PE=1 SV=2	Sorcs2	3.04137e+08	5.73935e+08	3.15792e+08	2.8048e+08	4.54706e+08	3.63834e+08	2.65111e+08	4.96192e+08	3.21063e+08	4.93732e+08	3.40745e+08	3.19401e+08	4.05733e+08	3.58173e+08	2.65728e+08	2.87073e+08	4.89398e+08	6.87478e+08	3.52407e+08	4.42247e+08	28.1801	29.0963	28.2344	28.0633	28.7604	28.4387	27.982	28.8863	28.2583	28.8792	28.3441	28.2508	28.596	28.4161	27.9854	28.0968	28.8664	29.3567	28.3927	28.7203
Q5SUA5	MYO1G_MOUSE	Unconventional myosin-Ig OS=Mus musculus GN=Myo1g PE=2 SV=1	Myo1g	4.21246e+08	4.58571e+08	4.07267e+08	3.1298e+08	3.85949e+08	3.97587e+08	3.46929e+08	3.92805e+08	4.14844e+08	4.05014e+08	3.51709e+08	4.17276e+08	4.39813e+08	3.71262e+08	3.46691e+08	4.23361e+08	4.13461e+08	3.9476e+08	2.70858e+08	4.32889e+08	28.6501	28.7726	28.6014	28.2215	28.5238	28.5667	28.3701	28.5492	28.628	28.5934	28.3898	28.6364	28.7123	28.4679	28.3691	28.6573	28.6232	28.5564	28.013	28.6894
Q9WVJ2	PSD13_MOUSE	26S proteasome non-ATPase regulatory subunit 13 OS=Mus musculus GN=Psmd13 PE=1 SV=1	Psmd13	4.61202e+08	3.38934e+08	4.32576e+08	3.87765e+08	3.98446e+08	3.70256e+08	3.26311e+08	3.85048e+08	4.11594e+08	3.54487e+08	3.85698e+08	4.18213e+08	4.7238e+08	4.1073e+08	3.59372e+08	4.46143e+08	4.42394e+08	2.73016e+08	3.69055e+08	3.53592e+08	28.7808	28.3364	28.6884	28.5306	28.5698	28.4639	28.2817	28.5205	28.6166	28.4012	28.5229	28.6397	28.8154	28.6136	28.4209	28.7329	28.7208	28.0244	28.4593	28.3975
Q9Z2K1	K1C16_MOUSE	Keratin, type I cytoskeletal 16 OS=Mus musculus GN=Krt16 PE=1 SV=3	Krt16 Krt1-16	3.13304e+08	9.66669e+08	2.97584e+08	2.78239e+08	1.55956e+08	3.6653e+08	2.3364e+08	6.23122e+08	2.44333e+08	2.24371e+08	2.37551e+08	2.76508e+08	2.14941e+08	3.65021e+08	1.89812e+08	9.38824e+08	2.38919e+08	1.01187e+09	3.22298e+08	2.92038e+08	28.223	29.8484	28.1487	28.0517	27.2166	28.4494	27.7997	29.2149	27.8643	27.7413	27.8237	28.0427	27.6794	28.4434	27.5	29.8063	27.8319	29.9144	28.2638	28.1216
Q9QYC1	PCX1_MOUSE	Pecanex-like protein 1 OS=Mus musculus GN=Pcnx PE=2 SV=3	Pcnx1 Kiaa0805 Pcnx Pcnxl1	4.3499e+08	2.40197e+08	4.75746e+08	3.04033e+08	4.22058e+08	4.11872e+08	3.58541e+08	4.50668e+08	4.19352e+08	2.8823e+08	3.24371e+08	5.30533e+08	3.67277e+08	4.17294e+08	4.12041e+08	4.69539e+08	3.90706e+08	2.72376e+08	4.54686e+08	3.40646e+08	28.6964	27.8396	28.8256	28.1797	28.6529	28.6176	28.4176	28.7475	28.6436	28.1026	28.2731	28.9829	28.4523	28.6365	28.6182	28.8067	28.5415	28.021	28.7603	28.3437
Q69ZR2	HECD1_MOUSE	E3 ubiquitin-protein ligase HECTD1 OS=Mus musculus GN=Hectd1 PE=1 SV=2	Hectd1 Kiaa1131 Opm	4.86358e+08	3.68004e+08	4.65142e+08	4.27195e+08	4.3639e+08	3.0998e+08	4.09586e+08	4.37672e+08	4.03545e+08	2.63421e+08	4.09429e+08	4.40458e+08	4.08523e+08	4.01394e+08	4.62505e+08	3.70022e+08	3.30845e+08	2.74959e+08	3.91462e+08	2.81252e+08	28.8574	28.4551	28.7931	28.6703	28.701	28.2076	28.6096	28.7053	28.5882	27.9728	28.609	28.7144	28.6058	28.5804	28.7849	28.463	28.3016	28.0346	28.5443	28.0673
P70694	DHB5_MOUSE	Estradiol 17 beta-dehydrogenase 5 OS=Mus musculus GN=Akr1c6 PE=1 SV=1	Akr1c6 Hsd17b5	3.65738e+08	4.18637e+08	3.83177e+08	3.90027e+08	3.47916e+08	3.77602e+08	3.85813e+08	3.31853e+08	3.92648e+08	4.03314e+08	4.16184e+08	3.74955e+08	4.26643e+08	4.24656e+08	4.35751e+08	4.13138e+08	3.69655e+08	3.84606e+08	3.46357e+08	3.87933e+08	28.4462	28.6411	28.5134	28.539	28.3742	28.4923	28.5233	28.306	28.5487	28.5873	28.6326	28.4821	28.6685	28.6617	28.6989	28.6221	28.4616	28.5188	28.3677	28.5312
P97370	AT1B3_MOUSE	Sodium/potassium-transporting ATPase subunit beta-3 OS=Mus musculus GN=Atp1b3 PE=1 SV=1	Atp1b3	3.4891e+08	1.11185e+08	7.25083e+08	9.01775e+08	4.48366e+08	1.73446e+08	2.52953e+08	1.10489e+08	3.58092e+08	5.94765e+07	6.98489e+08	1.75094e+08	2.43272e+08	5.37021e+08	9.37925e+08	2.18623e+08	3.6437e+08	6.54733e+07	9.39505e+08	7.93325e+07	28.3783	26.7284	29.4336	29.7482	28.7401	27.3699	27.9143	26.7193	28.4158	25.8258	29.3797	27.3836	27.858	29.0004	29.8049	27.7039	28.4408	25.9644	29.8073	26.2414
P48725	PCNT_MOUSE	Pericentrin OS=Mus musculus GN=Pcnt PE=1 SV=2	Pcnt Pcnt2	7.23335e+08	4.31418e+08	2.41207e+08	6.08454e+08	3.56739e+08	5.73548e+08	5.13666e+08	5.52887e+08	3.91335e+08	3.70712e+08	2.77864e+08	4.03268e+08	2.69945e+08	4.23881e+08	2.56103e+08	1.95817e+08	3.20175e+08	2.79933e+08	2.32859e+08	3.16871e+08	29.4301	28.6845	27.8457	29.1806	28.4103	29.0953	28.9363	29.0424	28.5438	28.4657	28.0498	28.5872	28.0081	28.6591	27.9322	27.5449	28.2543	28.0605	27.7949	28.2393
P50518	VATE1_MOUSE	V-type proton ATPase subunit E 1 OS=Mus musculus GN=Atp6v1e1 PE=1 SV=2	Atp6v1e1 Atp6e Atp6e2	3.87657e+08	4.57993e+08	3.4988e+08	3.56433e+08	3.34118e+08	2.89434e+08	3.13676e+08	2.95288e+08	3.0996e+08	3.46071e+08	3.24356e+08	3.64586e+08	4.10084e+08	3.89792e+08	3.51257e+08	4.40857e+08	4.87966e+08	4.9607e+08	5.14652e+08	5.02068e+08	28.5302	28.7707	28.3823	28.4091	28.3158	28.1087	28.2247	28.1375	28.2075	28.3665	28.273	28.4417	28.6113	28.5381	28.388	28.7157	28.8622	28.886	28.939	28.9033
P25444	RS2_MOUSE	40S ribosomal protein S2 OS=Mus musculus GN=Rps2 PE=1 SV=3	Rps2 Llrep3 Rps4	2.69625e+08	3.03764e+08	2.69402e+08	2.8508e+08	3.74653e+08	3.71317e+08	3.96668e+08	4.03262e+08	3.77391e+08	3.71418e+08	3.71603e+08	3.55339e+08	3.40462e+08	3.24428e+08	3.34033e+08	3.43211e+08	5.43702e+08	5.404e+08	5.66312e+08	5.73338e+08	28.0064	28.1784	28.0052	28.0868	28.481	28.4681	28.5634	28.5871	28.4915	28.4685	28.4692	28.4046	28.3429	28.2733	28.3154	28.3545	29.0182	29.0095	29.077	29.0948
Q78PY7	SND1_MOUSE	Staphylococcal nuclease domain-containing protein 1 OS=Mus musculus GN=Snd1 PE=1 SV=1	Snd1	3.70533e+08	3.68455e+08	4.10489e+08	3.95028e+08	3.36375e+08	3.74041e+08	3.67087e+08	3.13386e+08	4.05031e+08	3.87088e+08	3.86633e+08	3.81049e+08	4.36887e+08	4.12677e+08	4.2979e+08	3.73334e+08	4.10454e+08	3.65798e+08	3.75718e+08	3.78851e+08	28.465	28.4569	28.6128	28.5574	28.3255	28.4786	28.4515	28.2234	28.5935	28.5281	28.5264	28.5054	28.7027	28.6204	28.6791	28.4759	28.6126	28.4465	28.4851	28.4971
Q62177	SEM3B_MOUSE	Semaphorin-3B OS=Mus musculus GN=Sema3b PE=2 SV=2	Sema3b Sema Semaa	4.87671e+08	2.09772e+08	4.98838e+08	3.35611e+08	3.02374e+08	3.43654e+08	2.7484e+08	2.79538e+08	4.04991e+08	2.6877e+08	3.78347e+08	5.55119e+08	4.40204e+08	4.72723e+08	6.26993e+08	5.00639e+08	4.58192e+08	1.86447e+08	3.93117e+08	2.54843e+08	28.8613	27.6442	28.894	28.3222	28.1718	28.3564	28.034	28.0585	28.5933	28.0018	28.4951	29.0482	28.7136	28.8164	29.2239	28.8992	28.7714	27.4742	28.5504	27.925
Q9R1B9	SLIT2_MOUSE	Slit homolog 2 protein OS=Mus musculus GN=Slit2 PE=2 SV=2	Slit2	3.92644e+08	4.33901e+08	3.46527e+08	3.43598e+08	3.99055e+08	2.96809e+08	3.24936e+08	4.8126e+08	3.08016e+08	3.27011e+08	3.12065e+08	4.99825e+08	4.18928e+08	5.32512e+08	4.53558e+08	4.57544e+08	3.21784e+08	2.94771e+08	3.99148e+08	3.2205e+08	28.5486	28.6928	28.3684	28.3561	28.572	28.145	28.2756	28.8422	28.1984	28.2848	28.2173	28.8968	28.6421	28.9882	28.7567	28.7693	28.2615	28.135	28.5723	28.2627
Q69ZF8	MSL2_MOUSE	E3 ubiquitin-protein ligase MSL2 OS=Mus musculus GN=Msl2 PE=2 SV=2	Msl2 Kiaa1585 Msl2l1 Rnf184	4.56922e+08	3.34138e+08	4.16317e+08	4.34355e+08	3.37303e+08	3.58535e+08	3.31669e+08	3.19852e+08	4.27122e+08	3.01077e+08	3.14137e+08	4.42428e+08	3.84168e+08	4.34283e+08	3.97715e+08	5.11253e+08	3.51213e+08	3.24921e+08	3.94589e+08	3.7398e+08	28.7674	28.3159	28.6331	28.6943	28.3295	28.4175	28.3052	28.2528	28.6701	28.1656	28.2268	28.7209	28.5172	28.6941	28.5672	28.9295	28.3878	28.2755	28.5558	28.4784
O54774	AP3D1_MOUSE	AP-3 complex subunit delta-1 OS=Mus musculus GN=Ap3d1 PE=1 SV=1	Ap3d1 Ap3d	3.21687e+08	4.10171e+08	3.5994e+08	3.7235e+08	3.50422e+08	4.35164e+08	4.60945e+08	3.87353e+08	3.30722e+08	3.51478e+08	3.7047e+08	3.66356e+08	3.60666e+08	3.49875e+08	3.86677e+08	3.56824e+08	4.32216e+08	3.60334e+08	4.45854e+08	4.18764e+08	28.2611	28.6116	28.4232	28.4721	28.3845	28.697	28.78	28.5291	28.301	28.3889	28.4648	28.4487	28.4261	28.3823	28.5266	28.4106	28.6872	28.4248	28.732	28.6416
P53026	RL10A_MOUSE	60S ribosomal protein L10a OS=Mus musculus GN=Rpl10a PE=1 SV=3	Rpl10a Nedd-6 Nedd6	3.69268e+08	3.30502e+08	3.72384e+08	3.80887e+08	3.0043e+08	3.4463e+08	3.49928e+08	3.17864e+08	4.08301e+08	4.09585e+08	4.03884e+08	3.76221e+08	3.68886e+08	3.9132e+08	4.03147e+08	3.58504e+08	4.3356e+08	4.24395e+08	4.31314e+08	4.50108e+08	28.4601	28.3001	28.4722	28.5048	28.1625	28.3605	28.3825	28.2438	28.6051	28.6096	28.5894	28.487	28.4586	28.5438	28.5867	28.4174	28.6917	28.6608	28.6842	28.7457
P61079	UB2D3_MOUSE	Ubiquitin-conjugating enzyme E2 D3 OS=Mus musculus GN=Ube2d3 PE=1 SV=1	Ube2d3	3.78997e+08	4.51909e+08	3.46281e+08	4.18669e+08	4.99453e+08	3.68036e+08	6.4069e+08	6.91825e+08	2.91174e+08	3.06251e+08	3.07184e+08	2.45478e+08	3.14754e+08	2.81652e+08	2.88052e+08	3.15529e+08	2.43918e+08	4.89433e+08	4.05948e+08	3.13339e+08	28.4976	28.7515	28.3674	28.6412	28.8958	28.4553	29.2551	29.3658	28.1173	28.1901	28.1945	27.871	28.2296	28.0693	28.1018	28.2332	27.8618	28.8665	28.5967	28.2232
O35286	DHX15_MOUSE	Putative pre-mRNA-splicing factor ATP-dependent RNA helicase DHX15 OS=Mus musculus GN=Dhx15 PE=2 SV=2	Dhx15 Ddx15 Deah9	3.53324e+08	4.89967e+08	3.64756e+08	3.79984e+08	3.64629e+08	3.34584e+08	2.79195e+08	3.47866e+08	3.57614e+08	4.14013e+08	3.48312e+08	3.74051e+08	3.24823e+08	3.51133e+08	2.74089e+08	4.42652e+08	3.23698e+08	6.2918e+08	3.72236e+08	4.63727e+08	28.3964	28.8681	28.4424	28.5014	28.4419	28.3178	28.0567	28.374	28.4138	28.6251	28.3758	28.4787	28.2751	28.3874	28.0301	28.7216	28.2701	29.2289	28.4716	28.7887
Q8K4G1	LTBP4_MOUSE	Latent-transforming growth factor beta-binding protein 4 OS=Mus musculus GN=Ltbp4 PE=2 SV=2	Ltbp4	4.57614e+08	6.79935e+08	3.77734e+08	3.89935e+08	3.59347e+08	3.15384e+08	2.5501e+08	5.9312e+08	2.59731e+08	4.15962e+08	2.53616e+08	3.26617e+08	2.76813e+08	3.20292e+08	2.20261e+08	4.09004e+08	3.13198e+08	5.44923e+08	2.95997e+08	5.12383e+08	28.7696	29.3408	28.4928	28.5387	28.4208	28.2325	27.926	29.1437	27.9524	28.6319	27.9181	28.283	28.0443	28.2548	27.7146	28.6075	28.2225	29.0215	28.141	28.9326
Q91YI0	ARLY_MOUSE	Argininosuccinate lyase OS=Mus musculus GN=Asl PE=2 SV=1	Asl	4.05383e+08	3.65358e+08	4.59551e+08	3.54384e+08	3.12133e+08	3.64001e+08	3.49384e+08	3.97844e+08	3.9298e+08	3.80195e+08	3.73458e+08	3.93742e+08	3.99433e+08	3.98087e+08	4.37479e+08	3.5637e+08	3.37464e+08	3.92918e+08	3.43188e+08	3.61709e+08	28.5947	28.4447	28.7756	28.4007	28.2176	28.4394	28.3802	28.5676	28.5499	28.5022	28.4764	28.5527	28.5734	28.5685	28.7046	28.4088	28.3302	28.5497	28.3544	28.4303
O35566	CD151_MOUSE	CD151 antigen OS=Mus musculus GN=Cd151 PE=2 SV=2	Cd151 Peta3	2.70676e+08	3.37684e+08	2.65915e+08	3.29013e+08	5.3309e+08	4.64757e+08	5.66043e+08	5.79001e+08	3.35232e+08	4.31935e+08	3.47943e+08	4.60089e+08	2.84682e+08	2.72822e+08	2.60435e+08	2.41804e+08	4.09037e+08	3.66471e+08	3.83235e+08	4.25938e+08	28.012	28.3311	27.9864	28.2936	28.9898	28.7919	29.0763	29.109	28.3206	28.6862	28.3743	28.7773	28.0848	28.0234	27.9563	27.8493	28.6077	28.4491	28.5137	28.6661
Q6NS45	CCD66_MOUSE	Coiled-coil domain-containing protein 66 OS=Mus musculus GN=Ccdc66 PE=1 SV=3	Ccdc66	3.46722e+08	3.8116e+08	3.6033e+08	3.47149e+08	3.55434e+08	3.80175e+08	3.51851e+08	3.40414e+08	3.93517e+08	3.75713e+08	3.77885e+08	3.83308e+08	4.00607e+08	4.35846e+08	4.29887e+08	4.07906e+08	3.60619e+08	3.6362e+08	3.61253e+08	3.9185e+08	28.3692	28.5058	28.4247	28.371	28.405	28.5021	28.3904	28.3427	28.5518	28.4851	28.4934	28.5139	28.5776	28.6992	28.6794	28.6037	28.4259	28.4379	28.4284	28.5457
Q01405	SC23A_MOUSE	Protein transport protein Sec23A OS=Mus musculus GN=Sec23a PE=1 SV=2	Sec23a Sec23 Sec23r	3.96619e+08	3.79064e+08	3.74088e+08	3.72295e+08	3.27736e+08	3.39248e+08	2.77609e+08	3.35983e+08	4.21346e+08	4.13111e+08	3.77461e+08	4.16001e+08	4.25629e+08	3.88028e+08	3.768e+08	3.90555e+08	3.97142e+08	3.29156e+08	4.02332e+08	3.62738e+08	28.5632	28.4979	28.4788	28.4719	28.288	28.3378	28.0485	28.3238	28.6504	28.622	28.4918	28.632	28.665	28.5316	28.4892	28.541	28.5651	28.2942	28.5838	28.4344
Q5U462	CDCP1_MOUSE	CUB domain-containing protein 1 OS=Mus musculus GN=Cdcp1 PE=2 SV=1	Cdcp1	4.16831e+08	3.36733e+08	4.17835e+08	3.73881e+08	3.62394e+08	3.57024e+08	3.59266e+08	3.81775e+08	3.48339e+08	3.46046e+08	3.47104e+08	4.43905e+08	3.68119e+08	3.7556e+08	3.83085e+08	3.73342e+08	4.27572e+08	3.14123e+08	3.88303e+08	3.65422e+08	28.6349	28.327	28.6384	28.478	28.433	28.4114	28.4205	28.5081	28.3759	28.3664	28.3708	28.7257	28.4556	28.4845	28.5131	28.4759	28.6716	28.2268	28.5326	28.445
[truncated: 1,332 more rows]
