# Supplementary material for: Comparative Proteomics Analysis of Exosomes Identifies Key Pathways and Protein Markers Related to Breast Cancer Metastasis
Source: Int J Mol Sci. 2023 Feb 17;24(4):4033. doi: 10.3390/ijms24044033 (PMC9967130; doi:10.3390/ijms24044033)
Supplement: Supplementary file 1 [file ijms-24-04033-s001.zip › Table S2 94 TOP100 proteins in ExoCarta.xlsx]

## Sheet: Table S2
Table S2	List of 94 quantified proteins among the TOP100 proteins in ExoCarta.
ProteinAC	ProteinID	Protein Name	Gene Name(s)	Untransformed MS intensities																				Log2 MS intensities
				116_1	116_2	116_3	116_4	Eph4_1	Eph4_2	Eph4_3	Eph4_4	1424_1	1424_2	1424_3	1424_4	1424.1_1	1424.1_2	1424.1_3	1424.1_4	1424.2_1	1424.2_2	1424.2_3	1424.2_4	116_1	116_2	116_3	116_4	Eph4_1	Eph4_2	Eph4_3	Eph4_4	1424_1	1424_2	1424_3	1424_4	1424.1_1	1424.1_2	1424.1_3	1424.1_4	1424.2_1	1424.2_2	1424.2_3	1424.2_4
P40240	CD9_MOUSE	CD9 antigen OS=Mus musculus GN=Cd9 PE=1 SV=2	Cd9	1.1915e+09	1.49014e+09	9.69498e+08	1.35339e+09	3.42269e+09	2.69755e+09	3.3291e+09	2.98968e+09	2.0244e+09	2.28507e+09	2.2162e+09	1.94513e+09	1.61422e+09	1.37614e+09	1.45797e+09	1.23735e+09	2.21169e+09	1.85874e+09	2.12623e+09	2.09211e+09	30.1501	30.4728	29.8527	30.3339	31.6725	31.329	31.6325	31.4773	30.9148	31.0896	31.0454	30.8572	30.5882	30.358	30.4413	30.2046	31.0425	30.7917	30.9856	30.9623
P60710	ACTB_MOUSE	Actin, cytoplasmic 1 OS=Mus musculus GN=Actb PE=1 SV=1	Actb	1.05191e+10	1.13266e+10	1.08481e+10	1.12106e+10	9.73273e+09	1.1166e+10	1.1538e+10	1.10119e+10	1.17905e+10	1.31185e+10	1.1574e+10	1.13518e+10	1.1234e+10	1.0227e+10	1.17881e+10	9.59727e+09	1.2656e+10	1.19857e+10	1.26583e+10	1.29149e+10	33.2923	33.399	33.3367	33.3841	33.1802	33.3784	33.4257	33.3583	33.4569	33.6109	33.4302	33.4022	33.3871	33.2517	33.4566	33.16	33.5591	33.4806	33.5594	33.5883
P07356	ANXA2_MOUSE	Annexin A2 OS=Mus musculus GN=Anxa2 PE=1 SV=2	Anxa2 Anx2 Cal1h	4.13988e+08	4.6192e+08	2.56637e+08	3.34975e+08	5.51534e+08	5.04363e+08	5.41652e+08	6.14608e+08	4.84482e+08	5.42833e+08	4.60202e+08	4.63367e+08	4.64188e+08	4.30242e+08	4.14192e+08	3.53679e+08	8.45063e+08	8.36005e+08	9.55158e+08	8.79785e+08	28.625	28.7831	27.9352	28.3195	29.0389	28.9099	29.0128	29.1951	28.8519	29.0159	28.7777	28.7876	28.7901	28.6806	28.6257	28.3979	29.6545	29.6389	29.8312	29.7126
P41731	CD63_MOUSE	CD63 antigen OS=Mus musculus GN=Cd63 PE=1 SV=2	Cd63	9.11428e+07	5.69429e+07	8.39671e+07	7.90888e+07	1.01181e+08	5.93241e+07	7.7041e+07	7.4394e+07	8.29293e+07	4.75948e+07	9.3031e+07	1.01767e+08	1.03571e+08	8.23283e+07	7.36019e+07	8.82591e+07	8.49793e+07	5.87554e+07	9.05228e+07	4.47491e+07	26.4416	25.763	26.3233	26.237	26.5924	25.8221	26.1991	26.1487	26.3054	25.5043	26.4712	26.6007	26.6261	26.2949	26.1332	26.3952	26.3406	25.8082	26.4318	25.4154
P06151	LDHA_MOUSE	L-lactate dehydrogenase A chain OS=Mus musculus GN=Ldha PE=1 SV=3	Ldha Ldh-1 Ldh1	3.25434e+09	3.91431e+09	3.53549e+09	3.69085e+09	3.34761e+09	3.62274e+09	3.49224e+09	3.40918e+09	3.6902e+09	3.84593e+09	3.9231e+09	3.65265e+09	3.87531e+09	3.86707e+09	3.94846e+09	3.76525e+09	3.74163e+09	4.25474e+09	3.82784e+09	4.24629e+09	31.5997	31.8661	31.7193	31.7813	31.6405	31.7544	31.7015	31.6668	31.7811	31.8407	31.8693	31.7663	31.8517	31.8486	31.8786	31.8101	31.801	31.9864	31.8339	31.9836
P09411	PGK1_MOUSE	Phosphoglycerate kinase 1 OS=Mus musculus GN=Pgk1 PE=1 SV=4	Pgk1 Pgk-1	3.55179e+09	2.57028e+09	3.40414e+09	3.35973e+09	2.8558e+09	3.03743e+09	2.84583e+09	2.78794e+09	3.43252e+09	2.78844e+09	3.15939e+09	3.47221e+09	3.60596e+09	3.71216e+09	3.77042e+09	3.5188e+09	3.30076e+09	2.38563e+09	2.98391e+09	2.67588e+09	31.7259	31.2593	31.6646	31.6457	31.4112	31.5002	31.4062	31.3766	31.6766	31.3768	31.557	31.6932	31.7477	31.7896	31.8121	31.7124	31.6202	31.1517	31.4746	31.3174
P05064	ALDOA_MOUSE	Fructose-bisphosphate aldolase A OS=Mus musculus GN=Aldoa PE=1 SV=2	Aldoa Aldo1	3.76312e+08	4.53777e+08	3.57416e+08	3.99513e+08	4.33642e+08	3.91902e+08	4.50959e+08	4.53731e+08	3.44223e+08	3.94975e+08	3.5276e+08	3.5554e+08	3.73979e+08	3.63779e+08	3.41227e+08	3.70694e+08	4.06348e+08	4.57305e+08	4.13348e+08	4.38797e+08	28.4874	28.7574	28.413	28.5737	28.6919	28.5459	28.7484	28.7573	28.3588	28.5572	28.3941	28.4054	28.4784	28.4385	28.3462	28.4657	28.5981	28.7686	28.6228	28.709
P48036	ANXA5_MOUSE	Annexin A5 OS=Mus musculus GN=Anxa5 PE=1 SV=1	Anxa5 Anx5	5.22937e+08	5.59525e+08	4.54256e+08	5.31904e+08	5.22876e+08	4.88159e+08	5.63059e+08	4.74178e+08	6.70894e+08	7.43084e+08	7.30822e+08	6.64563e+08	6.11053e+08	6.49589e+08	7.47624e+08	5.52731e+08	9.2049e+08	9.21673e+08	1.04212e+09	9.70824e+08	28.9621	29.0596	28.7589	28.9866	28.9619	28.8628	29.0687	28.8209	29.3215	29.469	29.4449	29.3078	29.1867	29.275	29.4777	29.042	29.7778	29.7797	29.9569	29.8546
P35762	CD81_MOUSE	CD81 antigen OS=Mus musculus GN=Cd81 PE=1 SV=2	Cd81 Tapa1	2.55607e+09	2.18325e+09	2.33067e+09	2.5751e+09	2.18757e+09	1.88922e+09	1.80721e+09	1.92048e+09	2.49353e+09	2.52288e+09	2.56468e+09	2.49875e+09	2.52188e+09	2.40183e+09	2.17049e+09	1.97045e+09	2.51741e+09	1.36308e+09	2.21032e+09	2.10619e+09	31.2513	31.0238	31.1181	31.262	31.0267	30.8151	30.7511	30.8388	31.2155	31.2324	31.2561	31.2186	31.2319	31.1615	31.0154	30.8759	31.2293	30.3442	31.0416	30.972
P17742	PPIA_MOUSE	Peptidyl-prolyl cis-trans isomerase A OS=Mus musculus GN=Ppia PE=1 SV=2	Ppia	7.67557e+09	7.21314e+09	7.44743e+09	8.10348e+09	8.5796e+09	8.67237e+09	8.1599e+09	8.18651e+09	8.55772e+09	9.37243e+09	8.82993e+09	8.00599e+09	7.54376e+09	7.724e+09	7.73116e+09	7.42602e+09	7.93164e+09	7.46342e+09	9.11837e+09	8.57105e+09	32.8376	32.748	32.7941	32.9159	32.9983	33.0138	32.9259	32.9306	32.9946	33.1258	33.0398	32.8984	32.8126	32.8467	32.848	32.7899	32.885	32.7972	33.0861	32.9968
P35700	PRDX1_MOUSE	Peroxiredoxin-1 OS=Mus musculus GN=Prdx1 PE=1 SV=1	Prdx1 Msp23 Paga Tdpx2	4.46393e+09	3.0679e+09	3.56672e+09	2.92732e+09	2.64502e+09	3.21116e+09	3.79409e+09	2.86441e+09	3.85433e+09	4.03314e+09	3.64311e+09	4.56727e+09	4.84641e+09	4.1816e+09	4.82846e+09	3.47519e+09	4.23496e+09	3.83824e+09	4.4131e+09	4.17011e+09	32.0557	31.5146	31.732	31.4469	31.3006	31.5804	31.8211	31.4156	31.8438	31.9093	31.7625	32.0887	32.1743	31.9614	32.1689	31.6944	31.9797	31.8378	32.0391	31.9574
Q99JI6	RAP1B_MOUSE	Ras-related protein Rap-1b OS=Mus musculus GN=Rap1b PE=2 SV=2	Rap1b	7.37721e+08	8.70257e+08	7.39935e+08	7.51942e+08	8.78488e+08	8.98587e+08	8.62444e+08	9.44507e+08	9.7308e+08	1.02268e+09	8.53786e+08	9.1202e+08	8.53751e+08	8.17382e+08	7.78067e+08	8.22203e+08	9.59506e+08	8.94032e+08	8.40003e+08	1.08302e+09	29.4585	29.6969	29.4628	29.486	29.7104	29.7431	29.6839	29.815	29.858	29.9297	29.6693	29.7645	29.6692	29.6064	29.5353	29.6149	29.8377	29.7358	29.6458	30.0124
O08917	FLOT1_MOUSE	Flotillin-1 OS=Mus musculus GN=Flot1 PE=1 SV=1	Flot1	1.3315e+09	1.42949e+09	1.29939e+09	1.51173e+09	1.75522e+09	1.62559e+09	1.58872e+09	1.63802e+09	1.94586e+09	1.95226e+09	1.97398e+09	1.84224e+09	1.83519e+09	1.66196e+09	1.68185e+09	1.58776e+09	1.98591e+09	1.6733e+09	1.87363e+09	1.99711e+09	30.3104	30.4129	30.2752	30.4936	30.709	30.5983	30.5652	30.6093	30.8578	30.8625	30.8785	30.7788	30.7733	30.6302	30.6474	30.5643	30.8872	30.64	30.8032	30.8953
Q8BTM8	FLNA_MOUSE	Filamin-A OS=Mus musculus GN=Flna PE=1 SV=5	Flna Fln Fln1	8.49485e+09	8.47101e+09	8.81178e+09	8.50312e+09	8.13018e+09	8.36378e+09	8.55031e+09	7.91288e+09	8.65273e+09	8.63254e+09	8.75648e+09	8.89096e+09	9.06778e+09	8.90421e+09	9.26161e+09	8.85856e+09	8.45932e+09	8.44917e+09	8.49021e+09	8.81066e+09	32.9839	32.9799	33.0368	32.9853	32.9206	32.9615	32.9933	32.8816	33.0105	33.0071	33.0277	33.0497	33.0781	33.0518	33.1086	33.0444	32.9779	32.9762	32.9832	33.0366
Q9Z1Q5	CLIC1_MOUSE	Chloride intracellular channel protein 1 OS=Mus musculus GN=Clic1 PE=1 SV=3	Clic1	3.74405e+09	4.1652e+09	3.36209e+09	3.92937e+09	3.27416e+09	3.74185e+09	4.14006e+09	3.42033e+09	4.71116e+09	3.9691e+09	3.76858e+09	3.58083e+09	3.91682e+09	3.71701e+09	3.67382e+09	3.73184e+09	3.65864e+09	4.21285e+09	3.35179e+09	4.9007e+09	31.802	31.9557	31.6467	31.8717	31.6085	31.8011	31.947	31.6715	32.1334	31.8862	31.8114	31.7376	31.867	31.7915	31.7746	31.7972	31.7687	31.9721	31.6423	32.1903
P60766	CDC42_MOUSE	Cell division control protein 42 homolog OS=Mus musculus GN=Cdc42 PE=1 SV=2	Cdc42	2.75561e+08	3.49496e+08	2.42765e+08	2.97995e+08	3.79795e+08	3.54399e+08	3.78407e+08	3.28454e+08	3.57325e+08	4.06886e+08	3.75126e+08	3.35867e+08	3.21061e+08	3.14484e+08	3.21078e+08	2.99926e+08	3.95235e+08	3.66954e+08	4.03558e+08	4.24834e+08	28.0378	28.3807	27.855	28.1507	28.5006	28.4008	28.4954	28.2911	28.4127	28.6	28.4828	28.3233	28.2583	28.2284	28.2583	28.16	28.5581	28.451	28.5882	28.6623
P63001	RAC1_MOUSE	Ras-related C3 botulinum toxin substrate 1 OS=Mus musculus GN=Rac1 PE=1 SV=1	Rac1	7.20045e+08	7.90204e+08	6.89772e+08	7.98212e+08	1.01834e+09	9.88392e+08	9.55946e+08	9.67706e+08	8.70075e+08	9.39629e+08	8.49697e+08	8.22254e+08	7.57378e+08	7.34655e+08	7.07349e+08	6.69994e+08	8.75129e+08	8.00488e+08	9.33473e+08	9.44047e+08	29.4235	29.5577	29.3615	29.5722	29.9236	29.8805	29.8324	29.85	29.6966	29.8075	29.6624	29.615	29.4964	29.4525	29.3978	29.3196	29.7049	29.5763	29.798	29.8143
P08752	GNAI2_MOUSE	Guanine nucleotide-binding protein G(i) subunit alpha-2 OS=Mus musculus GN=Gnai2 PE=1 SV=5	Gnai2 Gnai-2	4.46681e+08	5.38087e+08	3.37096e+08	4.67717e+08	4.91309e+08	4.33682e+08	4.64559e+08	4.73291e+08	5.44081e+08	6.69098e+08	5.38567e+08	5.89634e+08	4.37229e+08	4.31804e+08	4.18112e+08	3.83239e+08	7.13823e+08	7.25049e+08	7.4321e+08	8.05884e+08	28.7347	29.0033	28.3286	28.8011	28.8721	28.6921	28.7913	28.8182	29.0192	29.3176	29.0046	29.1352	28.7038	28.6858	28.6393	28.5137	29.411	29.4335	29.4692	29.586
P10107	ANXA1_MOUSE	Annexin A1 OS=Mus musculus GN=Anxa1 PE=1 SV=2	Anxa1 Anx1 Lpc-1 Lpc1	2.09251e+08	2.23848e+08	1.99845e+08	2.01783e+08	2.39884e+08	2.29438e+08	2.59846e+08	3.00418e+08	3.52426e+08	3.9765e+08	3.63102e+08	3.82055e+08	2.6261e+08	2.62541e+08	2.66098e+08	2.59462e+08	4.72878e+08	4.84379e+08	5.27756e+08	5.2157e+08	27.6407	27.7379	27.5743	27.5882	27.8378	27.7735	27.9531	28.1624	28.3927	28.5669	28.4358	28.5092	27.9683	27.968	27.9874	27.9509	28.8169	28.8516	28.9753	28.9583
Q9QUI0	RHOA_MOUSE	Transforming protein RhoA OS=Mus musculus GN=Rhoa PE=1 SV=1	Rhoa Arha Arha2	2.10194e+08	2.59019e+08	2.00068e+08	2.71693e+08	3.17049e+08	2.83015e+08	3.07445e+08	3.38927e+08	2.66433e+08	2.99947e+08	2.38613e+08	2.6232e+08	2.07984e+08	2.19669e+08	1.70641e+08	2.0965e+08	2.58015e+08	2.85841e+08	2.9319e+08	3.09037e+08	27.6471	27.9485	27.5759	28.0174	28.2401	28.0763	28.1958	28.3364	27.9892	28.1601	27.8301	27.9668	27.6319	27.7108	27.3464	27.6434	27.9429	28.0906	28.1273	28.2032
Q61171	PRDX2_MOUSE	Peroxiredoxin-2 OS=Mus musculus GN=Prdx2 PE=1 SV=3	Prdx2 Tdpx1 Tpx	1.26213e+08	1.42529e+08	1.18879e+08	1.30882e+08	1.00036e+08	1.20108e+08	1.12033e+08	1.13968e+08	1.39959e+08	1.33348e+08	1.24062e+08	1.43591e+08	1.24398e+08	1.34205e+08	1.30202e+08	1.24472e+08	1.44008e+08	1.52712e+08	1.249e+08	1.48341e+08	26.9113	27.0867	26.8249	26.9637	26.5759	26.8398	26.7394	26.7641	27.0604	26.9906	26.8865	27.0974	26.8904	26.9999	26.9562	26.8912	27.1016	27.1862	26.8962	27.1443
Q9EQP2	EHD4_MOUSE	EH domain-containing protein 4 OS=Mus musculus GN=Ehd4 PE=1 SV=1	Ehd4 Past2	6.15541e+08	6.11752e+08	5.58104e+08	6.98082e+08	1.48647e+09	1.29519e+09	1.49171e+09	1.50794e+09	1.08644e+09	1.23536e+09	1.14903e+09	1.13357e+09	8.30276e+08	7.8784e+08	8.2275e+08	7.08387e+08	1.20505e+09	1.16397e+09	1.24114e+09	1.24032e+09	29.1973	29.1884	29.056	29.3788	30.4692	30.2705	30.4743	30.4899	30.017	30.2023	30.0978	30.0782	29.629	29.5533	29.6159	29.4	30.1664	30.1164	30.209	30.2081
P57780	ACTN4_MOUSE	Alpha-actinin-4 OS=Mus musculus GN=Actn4 PE=1 SV=1	Actn4	2.78594e+07	3.27953e+07	2.51052e+07	3.11984e+07	2.69422e+07	2.25665e+07	2.45447e+07	2.07592e+07	2.6668e+07	2.82254e+07	3.31649e+07	2.66869e+07	2.09413e+07	2.93275e+07	2.87098e+07	2.17783e+07	2.54176e+07	3.88045e+07	2.94991e+07	3.14956e+07	24.7317	24.967	24.5815	24.895	24.6834	24.4277	24.5489	24.3072	24.6686	24.7505	24.9832	24.6696	24.3198	24.8058	24.775	24.3764	24.5993	25.2097	24.8142	24.9086
P51150	RAB7A_MOUSE	Ras-related protein Rab-7a OS=Mus musculus GN=Rab7a PE=1 SV=2	Rab7a Rab7	2.57025e+09	2.30478e+09	2.61228e+09	2.94595e+09	2.76125e+09	2.75624e+09	2.91861e+09	2.7726e+09	3.15554e+09	3.20254e+09	2.88329e+09	2.91804e+09	2.6306e+09	2.62858e+09	2.60612e+09	2.66473e+09	2.94489e+09	3.00727e+09	3.18465e+09	2.90926e+09	31.2593	31.102	31.2827	31.4561	31.3627	31.3601	31.4426	31.3686	31.5552	31.5766	31.4251	31.4424	31.2927	31.2916	31.2793	31.3113	31.4556	31.4858	31.5685	31.438
P16125	LDHB_MOUSE	L-lactate dehydrogenase B chain OS=Mus musculus GN=Ldhb PE=1 SV=2	Ldhb Ldh-2 Ldh2	3.97101e+09	4.00177e+09	4.01934e+09	3.77028e+09	3.47524e+09	4.32779e+09	3.31488e+09	3.60492e+09	4.43208e+09	4.33593e+09	4.26013e+09	4.20262e+09	4.99003e+09	4.45766e+09	4.64248e+09	4.3105e+09	4.33121e+09	3.70221e+09	3.74125e+09	4.17846e+09	31.8869	31.898	31.9043	31.812	31.6945	32.011	31.6263	31.7473	32.0453	32.0137	31.9883	31.9686	32.2164	32.0536	32.1122	32.0052	32.0121	31.7857	31.8009	31.9603
P35278	RAB5C_MOUSE	Ras-related protein Rab-5C OS=Mus musculus GN=Rab5c PE=1 SV=2	Rab5c	9.97283e+06	5.85951e+06	1.02511e+07	7.76775e+06	7.76384e+06	6.45269e+06	7.22693e+06	7.7538e+06	8.8108e+06	4.83076e+06	8.76112e+06	8.13111e+06	9.30709e+06	7.43894e+06	7.9479e+06	7.21192e+06	8.87341e+06	6.16324e+06	8.20028e+06	5.51403e+06	23.2496	22.4823	23.2893	22.8891	22.8883	22.6215	22.785	22.8865	23.0708	22.2038	23.0627	22.955	23.1499	22.8267	22.9221	22.782	23.0811	22.5553	22.9672	22.3947
P14824	ANXA6_MOUSE	Annexin A6 OS=Mus musculus GN=Anxa6 PE=1 SV=3	Anxa6 Anx6	1.12953e+09	1.13288e+09	1.06757e+09	1.28211e+09	1.49037e+09	1.25286e+09	1.26127e+09	1.2936e+09	1.2854e+09	1.21737e+09	1.37203e+09	1.24119e+09	1.1837e+09	1.27225e+09	1.48827e+09	1.10083e+09	1.50897e+09	1.3475e+09	1.83316e+09	1.4554e+09	30.0731	30.0773	29.9917	30.2559	30.473	30.2226	30.2322	30.2687	30.2596	30.1811	30.3537	30.2091	30.1407	30.2447	30.471	30.0359	30.4909	30.3276	30.7717	30.4388
P97429	ANXA4_MOUSE	Annexin A4 OS=Mus musculus GN=Anxa4 PE=2 SV=4	Anxa4 Anx4	2.4575e+08	2.23584e+08	2.16435e+08	2.4899e+08	2.50377e+08	2.41206e+08	2.27265e+08	2.40716e+08	2.35873e+08	2.16106e+08	2.337e+08	2.44144e+08	2.40001e+08	2.45046e+08	2.60183e+08	2.42705e+08	2.71555e+08	2.26758e+08	2.67893e+08	2.39159e+08	27.8726	27.7362	27.6894	27.8915	27.8995	27.8457	27.7598	27.8428	27.8134	27.6872	27.8001	27.8632	27.8385	27.8685	27.955	27.8546	28.0167	27.7566	27.9971	27.8334
Q91V92	ACLY_MOUSE	ATP-citrate synthase OS=Mus musculus GN=Acly PE=1 SV=1	Acly	1.54647e+09	1.34573e+09	1.6239e+09	1.56596e+09	1.25704e+09	1.46827e+09	1.21034e+09	1.34977e+09	1.50215e+09	1.41206e+09	1.47101e+09	1.58694e+09	1.67156e+09	1.62244e+09	1.50949e+09	1.58676e+09	1.45177e+09	1.22327e+09	1.4733e+09	1.3299e+09	30.5263	30.3257	30.5968	30.5444	30.2274	30.4515	30.1728	30.3301	30.4844	30.3952	30.4542	30.5636	30.6386	30.5955	30.4914	30.5634	30.4352	30.1881	30.4564	30.3087
Q91V41	RAB14_MOUSE	Ras-related protein Rab-14 OS=Mus musculus GN=Rab14 PE=1 SV=3	Rab14	4.37683e+08	5.49663e+08	4.34166e+08	4.90405e+08	5.04722e+08	4.77879e+08	5.42909e+08	4.76883e+08	4.4442e+08	4.88208e+08	4.70341e+08	4.36406e+08	4.5229e+08	4.46531e+08	4.28252e+08	4.45505e+08	4.64779e+08	5.71977e+08	5.08626e+08	5.968e+08	28.7053	29.034	28.6937	28.8694	28.9109	28.8321	29.0161	28.8291	28.7273	28.8629	28.8091	28.7011	28.7527	28.7342	28.6739	28.7309	28.792	29.0914	28.922	29.1527
Q02053	UBA1_MOUSE	Ubiquitin-like modifier-activating enzyme 1 OS=Mus musculus GN=Uba1 PE=1 SV=1	Uba1 Sbx Ube1 Ube1ax Ube1x	4.93517e+09	3.69508e+09	4.43396e+09	5.07557e+09	4.47887e+09	4.75348e+09	3.86874e+09	4.2405e+09	4.61475e+09	4.24354e+09	5.06116e+09	4.55735e+09	4.87227e+09	4.84455e+09	4.71502e+09	4.58055e+09	4.57245e+09	3.22654e+09	4.7761e+09	4.17184e+09	32.2005	31.783	32.0459	32.2409	32.0605	32.1463	31.8492	31.9816	32.1036	31.9826	32.2368	32.0855	32.1819	32.1737	32.1346	32.0929	32.0903	31.5873	32.1532	31.958
P62827	RAN_MOUSE	GTP-binding nuclear protein Ran OS=Mus musculus GN=Ran PE=1 SV=3	Ran Rasl2-8	2.48295e+09	2.55037e+09	2.58995e+09	2.67199e+09	2.39642e+09	2.48845e+09	2.51883e+09	2.27474e+09	2.61154e+09	2.57508e+09	2.79034e+09	2.57509e+09	2.67525e+09	2.8333e+09	2.831e+09	2.66833e+09	2.53058e+09	2.58292e+09	2.48472e+09	2.60455e+09	31.2094	31.2481	31.2703	31.3153	31.1582	31.2126	31.2301	31.0831	31.2823	31.262	31.3778	31.262	31.317	31.3998	31.3987	31.3133	31.2368	31.2664	31.2104	31.2784
P61021	RAB5B_MOUSE	Ras-related protein Rab-5B OS=Mus musculus GN=Rab5b PE=1 SV=1	Rab5b	1.79199e+07	2.15228e+07	1.65942e+07	1.96824e+07	1.89854e+07	1.96108e+07	2.22818e+07	1.8591e+07	1.9863e+07	2.24572e+07	1.89756e+07	1.89485e+07	2.19906e+07	2.03893e+07	2.02979e+07	2.22169e+07	1.8125e+07	2.89702e+07	2.02549e+07	2.01103e+07	24.0951	24.3594	23.9842	24.2304	24.1784	24.2251	24.4094	24.1481	24.2436	24.4207	24.1776	24.1756	24.3904	24.2813	24.2748	24.4052	24.1115	24.7881	24.2718	24.2614
P62821	RAB1A_MOUSE	Ras-related protein Rab-1A OS=Mus musculus GN=Rab1A PE=1 SV=3	Rab1A Rab1	1.24363e+09	7.59328e+08	1.34467e+09	1.03276e+09	7.28757e+08	6.11426e+08	4.14709e+08	7.61733e+08	6.85143e+08	4.58191e+08	8.78347e+08	1.11183e+09	1.03181e+09	8.35776e+08	7.39227e+08	9.12156e+08	9.30062e+08	6.68059e+08	1.11898e+09	5.65563e+08	30.2119	29.5001	30.3246	29.9439	29.4409	29.1876	28.6275	29.5047	29.3518	28.7714	29.7102	30.0503	29.9425	29.6385	29.4614	29.7647	29.7928	29.3154	30.0595	29.0751
P17047	LAMP2_MOUSE	Lysosome-associated membrane glycoprotein 2 OS=Mus musculus GN=Lamp2 PE=2 SV=2	Lamp2 Lamp-2	3.9913e+07	4.92063e+07	2.9252e+07	4.42409e+07	3.09837e+07	2.44381e+07	3.72853e+07	2.63498e+07	4.22496e+07	6.14828e+07	6.31833e+07	3.77675e+07	4.40069e+07	3.44593e+07	5.32285e+07	2.15324e+07	5.73892e+07	5.45583e+07	7.21557e+07	5.49719e+07	25.2504	25.5523	24.802	25.3989	24.885	24.5426	25.1521	24.6513	25.3324	25.8737	25.913	25.1706	25.3912	25.0384	25.6657	24.36	25.7743	25.7013	26.1046	25.7122
P40142	TKT_MOUSE	Transketolase OS=Mus musculus GN=Tkt PE=1 SV=1	Tkt	4.16946e+08	3.54467e+08	4.33286e+08	3.77141e+08	3.29313e+08	3.07987e+08	3.16293e+08	3.19231e+08	3.15825e+08	2.43788e+08	3.87914e+08	3.91475e+08	4.17445e+08	3.68711e+08	4.48664e+08	3.45891e+08	3.26505e+08	2.59057e+08	3.36626e+08	2.52282e+08	28.6353	28.4011	28.6907	28.4905	28.2949	28.1983	28.2367	28.25	28.2345	27.8611	28.5312	28.5443	28.637	28.4579	28.7411	28.3657	28.2825	27.9487	28.3266	27.9105
P54116	STOM_MOUSE	Erythrocyte band 7 integral membrane protein OS=Mus musculus GN=Stom PE=1 SV=3	Stom Epb7.2 Epb72	2.30409e+08	3.0037e+08	2.08882e+08	2.76896e+08	2.54331e+08	2.35899e+08	2.40529e+08	2.25161e+08	3.6047e+08	3.96336e+08	3.64518e+08	3.45216e+08	3.15513e+08	3.08719e+08	3.08812e+08	2.61063e+08	4.05211e+08	3.97244e+08	3.79975e+08	4.02888e+08	27.7796	28.1622	27.6381	28.0448	27.9221	27.8136	27.8416	27.7464	28.4253	28.5621	28.4414	28.3629	28.2331	28.2017	28.2022	27.9598	28.5941	28.5654	28.5013	28.5858
P55258	RAB8A_MOUSE	Ras-related protein Rab-8A OS=Mus musculus GN=Rab8a PE=1 SV=2	Rab8a Mel Rab8	6.46266e+07	1.09018e+08	2.7995e+07	7.84118e+07	5.84257e+07	6.64949e+07	4.14396e+07	4.89024e+07	4.85206e+07	5.7502e+07	4.60698e+07	5.75457e+07	3.94424e+07	6.96514e+07	4.12084e+07	5.93863e+07	6.14336e+07	7.20954e+07	7.24887e+07	4.17149e+07	25.9456	26.7	24.7387	26.2246	25.8001	25.9867	25.3045	25.5434	25.5321	25.7771	25.4573	25.7782	25.2332	26.0536	25.2964	25.8236	25.8725	26.1034	26.1113	25.3141
Q61838	A2M_MOUSE	Alpha-2-macroglobulin OS=Mus musculus GN=A2m PE=1 SV=3	Pzp A2m	1.09519e+10	1.03856e+10	1.21124e+10	1.24377e+10	9.06636e+09	1.14883e+10	1.29656e+10	9.21021e+09	1.28926e+10	1.22361e+10	1.48064e+10	1.33128e+10	1.32771e+10	1.71169e+10	2.44755e+10	1.37818e+10	1.0562e+10	1.51693e+10	1.97447e+10	1.24864e+10	33.3505	33.2739	33.4958	33.534	33.0779	33.4194	33.594	33.1006	33.5858	33.5104	33.7855	33.6321	33.6282	33.9947	34.5106	33.682	33.2982	33.8204	34.2007	33.5396
P63017	HSP7C_MOUSE	Heat shock cognate 71 kDa protein OS=Mus musculus GN=Hspa8 PE=1 SV=1	Hspa8 Hsc70 Hsc73	1.0646e+10	1.04305e+10	1.00965e+10	1.08036e+10	1.37614e+10	1.34811e+10	1.35225e+10	1.33374e+10	1.46156e+10	1.47373e+10	1.46277e+10	1.3778e+10	1.34931e+10	1.27193e+10	1.28939e+10	1.19016e+10	1.50351e+10	1.23409e+10	1.53651e+10	1.41435e+10	33.3096	33.2801	33.2331	33.3308	33.6799	33.6502	33.6546	33.6348	33.7668	33.7787	33.768	33.6816	33.6515	33.5663	33.586	33.4704	33.8076	33.5227	33.8389	33.7194
Q9WU78	PDC6I_MOUSE	Programmed cell death 6-interacting protein OS=Mus musculus GN=Pdcd6ip PE=1 SV=3	Pdcd6ip Aip1 Alix	2.79295e+09	3.39433e+09	2.319e+09	2.97617e+09	3.1737e+09	2.7015e+09	2.94018e+09	2.7648e+09	3.69294e+09	3.83894e+09	3.61934e+09	3.07924e+09	3.32509e+09	2.85939e+09	2.85816e+09	2.70805e+09	3.3317e+09	3.17935e+09	3.4649e+09	3.49867e+09	31.3791	31.6605	31.1109	31.4708	31.5635	31.3311	31.4533	31.3645	31.7821	31.8381	31.7531	31.5199	31.6307	31.4131	31.4124	31.3346	31.6336	31.5661	31.6902	31.7042
P16858	G3P_MOUSE	Glyceraldehyde-3-phosphate dehydrogenase OS=Mus musculus GN=Gapdh PE=1 SV=2	Gapdh Gapd	1.51949e+10	1.48725e+10	1.5132e+10	1.52966e+10	1.59736e+10	1.83046e+10	1.60662e+10	1.51559e+10	1.76112e+10	1.83837e+10	1.81998e+10	1.68235e+10	1.78201e+10	1.81503e+10	1.84984e+10	1.65981e+10	1.83883e+10	1.52759e+10	1.62863e+10	1.67916e+10	33.8229	33.7919	33.8169	33.8325	33.895	34.0915	33.9033	33.8192	34.0358	34.0977	34.0832	33.9698	34.0528	34.0793	34.1067	33.9503	34.0981	33.8305	33.9229	33.967
O08992	SDCB1_MOUSE	Syntenin-1 OS=Mus musculus GN=Sdcbp PE=2 SV=1	Sdcbp	2.78466e+09	2.56607e+09	2.79223e+09	2.80739e+09	3.5791e+09	3.52625e+09	3.55816e+09	3.32174e+09	3.73832e+09	3.90912e+09	3.93869e+09	3.50134e+09	3.26948e+09	3.13111e+09	3.29331e+09	2.88941e+09	3.20407e+09	2.89032e+09	3.29484e+09	3.10018e+09	31.3749	31.2569	31.3788	31.3866	31.737	31.7155	31.7285	31.6293	31.7997	31.8642	31.8751	31.7053	31.6064	31.544	31.6169	31.4281	31.5773	31.4286	31.6176	31.5297
P17182	ENOA_MOUSE	Alpha-enolase OS=Mus musculus GN=Eno1 PE=1 SV=3	Eno1 Eno-1	6.71376e+09	6.70872e+09	7.15725e+09	6.666e+09	6.67886e+09	7.5023e+09	6.46511e+09	6.88552e+09	7.42351e+09	7.57498e+09	6.93649e+09	7.29213e+09	7.46809e+09	7.33447e+09	7.13758e+09	7.19301e+09	7.48147e+09	6.46326e+09	6.7045e+09	7.12916e+09	32.6445	32.6434	32.7368	32.6342	32.637	32.8047	32.59	32.6809	32.7895	32.8186	32.6916	32.7637	32.7981	32.772	32.7328	32.7439	32.8007	32.5896	32.6425	32.7311
P07901	HS90A_MOUSE	Heat shock protein HSP 90-alpha OS=Mus musculus GN=Hsp90aa1 PE=1 SV=4	Hsp90aa1 Hsp86 Hsp86-1 Hspca	8.73082e+09	8.80366e+09	9.06141e+09	8.73229e+09	7.65857e+09	8.54666e+09	8.32609e+09	8.34416e+09	9.28427e+09	8.71738e+09	8.53844e+09	8.79291e+09	8.62841e+09	8.40837e+09	8.71253e+09	8.58122e+09	7.93446e+09	7.77422e+09	8.1442e+09	8.28109e+09	33.0235	33.0355	33.0771	33.0237	32.8344	32.9927	32.955	32.9581	33.1121	33.0212	32.9913	33.0337	33.0064	32.9692	33.0204	32.9985	32.8855	32.8561	32.9231	32.9472
Q61187	TS101_MOUSE	Tumor susceptibility gene 101 protein OS=Mus musculus GN=Tsg101 PE=1 SV=2	Tsg101	6.34052e+08	4.88607e+08	5.39106e+08	5.7686e+08	6.4405e+08	6.0497e+08	5.70667e+08	6.42865e+08	6.29418e+08	6.35698e+08	6.16131e+08	6.673e+08	5.89546e+08	5.66427e+08	5.7352e+08	5.56083e+08	5.6959e+08	4.19013e+08	5.8685e+08	5.71311e+08	29.24	28.8641	29.006	29.1036	29.2626	29.1723	29.0881	29.2599	29.2294	29.2438	29.1987	29.3138	29.135	29.0773	29.0953	29.0507	29.0853	28.6424	29.1284	29.0897
P52480	KPYM_MOUSE	Pyruvate kinase isozymes M1/M2 OS=Mus musculus GN=Pkm PE=1 SV=4	Pkm Pk3 Pkm2 Pykm	7.20996e+09	6.8957e+09	7.2122e+09	7.37923e+09	6.57437e+09	6.73177e+09	6.69748e+09	6.3946e+09	7.08269e+09	7.14247e+09	6.86013e+09	6.88989e+09	7.65906e+09	7.60656e+09	7.6156e+09	7.3806e+09	7.9438e+09	7.2706e+09	7.85338e+09	7.89754e+09	32.7473	32.683	32.7478	32.7808	32.6142	32.6483	32.641	32.5742	32.7217	32.7338	32.6756	32.6818	32.8345	32.8246	32.8263	32.7811	32.8872	32.7594	32.8707	32.8788
P10126	EF1A1_MOUSE	Elongation factor 1-alpha 1 OS=Mus musculus GN=Eef1a1 PE=1 SV=3	Eef1a1 Eef1a	5.74931e+09	6.56174e+09	5.33565e+09	5.86897e+09	7.45091e+09	6.38569e+09	6.86394e+09	6.94956e+09	6.93898e+09	7.08635e+09	6.79622e+09	6.20984e+09	7.04465e+09	6.22479e+09	6.43038e+09	5.94505e+09	8.72828e+09	7.67789e+09	8.80895e+09	8.01794e+09	32.4207	32.6114	32.313	32.4505	32.7948	32.5722	32.6764	32.6943	32.6921	32.7224	32.6621	32.5319	32.7139	32.5354	32.5823	32.469	33.023	32.8381	33.0363	32.9006
P63101	1433Z_MOUSE	14-3-3 protein zeta/delta OS=Mus musculus GN=Ywhaz PE=1 SV=1	Ywhaz	3.25056e+08	3.07876e+08	2.71546e+08	2.94042e+08	3.75937e+08	3.41064e+08	3.4497e+08	3.72336e+08	3.25919e+08	3.57075e+08	3.19892e+08	3.60611e+08	3.19355e+08	3.10691e+08	2.87181e+08	2.88625e+08	3.76197e+08	3.36872e+08	3.33131e+08	3.8318e+08	28.2761	28.1978	28.0166	28.1314	28.4859	28.3455	28.3619	28.472	28.2799	28.4117	28.253	28.4259	28.2506	28.2109	28.0974	28.1046	28.4869	28.3276	28.3115	28.5134
P58252	EF2_MOUSE	Elongation factor 2 OS=Mus musculus GN=Eef2 PE=1 SV=2	Eef2	2.28977e+10	3.44528e+10	2.50165e+10	2.98157e+10	2.97867e+10	2.51244e+10	2.64631e+10	2.625e+10	2.43093e+10	3.0091e+10	3.10156e+10	2.44151e+10	2.41667e+10	2.34436e+10	2.41242e+10	2.51634e+10	2.63401e+10	3.9184e+10	3.1069e+10	3.29859e+10	34.4145	35.0039	34.5422	34.7954	34.794	34.5484	34.6233	34.6116	34.5008	34.8086	34.8523	34.5071	34.4923	34.4485	34.4898	34.5506	34.6165	35.1895	34.8548	34.9411
P11499	HS90B_MOUSE	Heat shock protein HSP 90-beta OS=Mus musculus GN=Hsp90ab1 PE=1 SV=3	Hsp90ab1 Hsp84 Hsp84-1 Hspcb	6.1276e+09	6.58295e+09	6.22029e+09	6.53068e+09	5.45384e+09	5.91211e+09	6.30847e+09	5.98317e+09	6.55123e+09	6.84995e+09	6.57982e+09	6.21162e+09	5.45941e+09	5.77683e+09	6.72951e+09	5.91595e+09	5.7847e+09	6.58111e+09	6.3573e+09	6.67528e+09	32.5127	32.6161	32.5343	32.6046	32.3446	32.461	32.5546	32.4783	32.6091	32.6734	32.6154	32.5323	32.3461	32.4276	32.6479	32.462	32.4296	32.6157	32.5658	32.6362
P19096	FAS_MOUSE	Fatty acid synthase OS=Mus musculus GN=Fasn PE=1 SV=2	Fasn	2.03619e+09	1.93523e+09	1.99842e+09	1.92035e+09	1.88549e+09	1.97754e+09	1.9434e+09	1.90852e+09	1.98126e+09	1.99608e+09	1.96733e+09	1.89126e+09	2.19855e+09	2.04407e+09	2.15721e+09	2.17565e+09	1.99691e+09	2.11777e+09	1.99204e+09	2.03472e+09	30.9232	30.8499	30.8962	30.8387	30.8123	30.8811	30.8559	30.8298	30.8838	30.8945	30.8736	30.8167	31.0339	30.9288	31.0065	31.0188	30.8951	30.9799	30.8916	30.9222
P62259	1433E_MOUSE	14-3-3 protein epsilon OS=Mus musculus GN=Ywhae PE=1 SV=1	Ywhae	1.02771e+09	1.00618e+09	9.72648e+08	1.088e+09	1.00137e+09	9.88118e+08	1.07146e+09	9.56517e+08	1.02068e+09	9.66777e+08	1.07532e+09	1.01224e+09	8.58538e+08	9.35059e+08	9.83464e+08	9.45251e+08	9.40881e+08	9.35149e+08	1.02067e+09	1.02621e+09	29.9368	29.9062	29.8573	30.019	29.8993	29.8801	29.9969	29.8332	29.9269	29.8486	30.0021	29.9149	29.6773	29.8005	29.8733	29.8161	29.8094	29.8006	29.9269	29.9347
Q68FD5	CLH1_MOUSE	Clathrin heavy chain 1 OS=Mus musculus GN=Cltc PE=1 SV=3	Cltc	5.48987e+09	5.71158e+09	4.32348e+09	5.29291e+09	5.07163e+09	4.43581e+09	4.48729e+09	4.56042e+09	5.75113e+09	5.39702e+09	5.62566e+09	5.19242e+09	5.88162e+09	5.1179e+09	5.15723e+09	4.99956e+09	7.05218e+09	5.38778e+09	6.92173e+09	5.9785e+09	32.3541	32.4112	32.0095	32.3014	32.2398	32.0466	32.0632	32.0865	32.4212	32.3295	32.3894	32.2738	32.4536	32.2529	32.2639	32.2192	32.7154	32.327	32.6885	32.4771
P07724	ALBU_MOUSE	Serum albumin OS=Mus musculus GN=Alb PE=1 SV=3	Alb Alb-1 Alb1	7.56056e+10	8.75156e+10	7.809e+10	8.82477e+10	8.63101e+10	7.49575e+10	5.94686e+10	7.11573e+10	7.37972e+10	7.83673e+10	8.16579e+10	7.94172e+10	7.34354e+10	7.90924e+10	6.49503e+10	8.60987e+10	9.39302e+10	8.75735e+10	9.86614e+10	9.34377e+10	36.1378	36.3488	36.1844	36.3608	36.3288	36.1254	35.7914	36.0503	36.1028	36.1895	36.2489	36.2087	36.0958	36.2028	35.9186	36.3253	36.4509	36.3498	36.5218	36.4433
Q01853	TERA_MOUSE	Transitional endoplasmic reticulum ATPase OS=Mus musculus GN=Vcp PE=1 SV=4	Vcp	1.02728e+09	7.55354e+08	8.94543e+08	8.9928e+08	7.43507e+08	5.99386e+08	6.24168e+08	6.952e+08	1.00378e+09	9.24585e+08	1.0883e+09	9.87322e+08	9.27012e+08	9.68831e+08	9.95183e+08	9.37566e+08	1.09928e+09	1.23528e+09	1.45503e+09	9.45769e+08	29.9362	29.4926	29.7366	29.7442	29.4698	29.1589	29.2174	29.3729	29.9028	29.7842	30.0194	29.8789	29.788	29.8517	29.8904	29.8043	30.0339	30.2022	30.4384	29.8169
P17751	TPIS_MOUSE	Triosephosphate isomerase OS=Mus musculus GN=Tpi1 PE=1 SV=4	Tpi1 Tpi	1.64059e+09	1.18499e+09	2.20715e+09	1.99579e+09	2.02797e+09	1.79795e+09	2.41059e+09	1.97462e+09	1.7557e+09	1.40397e+09	2.3425e+09	1.69522e+09	1.73451e+09	2.24729e+09	2.50355e+09	1.68453e+09	1.55525e+09	1.37017e+09	2.11649e+09	1.19209e+09	30.6116	30.1422	31.0395	30.8943	30.9174	30.7437	31.1667	30.8789	30.7094	30.3869	31.1254	30.6588	30.6919	31.0655	31.2213	30.6497	30.5345	30.3517	30.979	30.1508
P26041	MOES_MOUSE	Moesin OS=Mus musculus GN=Msn PE=1 SV=3	Msn	6.78596e+08	8.48532e+08	5.36144e+08	6.83364e+08	9.15942e+08	7.89014e+08	9.45596e+08	8.91655e+08	9.44367e+08	1.13366e+09	9.93036e+08	9.59265e+08	7.11967e+08	6.92326e+08	7.46545e+08	6.58255e+08	1.07017e+09	1.13784e+09	1.20171e+09	1.27404e+09	29.338	29.6604	28.998	29.3481	29.7707	29.5555	29.8166	29.7319	29.8148	30.0783	29.8873	29.8374	29.4072	29.3669	29.4757	29.2941	29.9952	30.0837	30.1624	30.2468
P18760	COF1_MOUSE	Cofilin-1 OS=Mus musculus GN=Cfl1 PE=1 SV=3	Cfl1	5.70418e+08	7.91139e+08	4.96545e+08	6.7739e+08	8.54009e+08	6.85632e+08	7.32006e+08	7.25147e+08	7.33734e+08	9.14491e+08	6.90312e+08	6.30763e+08	5.71307e+08	5.5996e+08	5.70132e+08	6.04719e+08	7.38106e+08	6.83212e+08	7.07705e+08	6.93248e+08	29.0874	29.5594	28.8873	29.3354	29.6697	29.3529	29.4473	29.4337	29.4507	29.7684	29.3627	29.2325	29.0897	29.0607	29.0867	29.1717	29.4593	29.3478	29.3986	29.3688
P62962	PROF1_MOUSE	Profilin-1 OS=Mus musculus GN=Pfn1 PE=1 SV=2	Pfn1	7.00756e+09	6.09933e+09	7.27272e+09	6.89273e+09	6.11451e+09	7.11358e+09	6.45676e+09	6.23219e+09	7.71307e+09	7.18678e+09	7.59105e+09	7.5575e+09	8.05053e+09	7.10131e+09	7.82581e+09	6.80895e+09	7.69707e+09	6.49408e+09	7.05431e+09	6.72498e+09	32.7063	32.506	32.7598	32.6824	32.5096	32.7279	32.5882	32.5371	32.8447	32.7427	32.8217	32.8153	32.9064	32.7254	32.8656	32.6648	32.8417	32.5965	32.7159	32.6469
P09055	ITB1_MOUSE	Integrin beta-1 OS=Mus musculus GN=Itgb1 PE=1 SV=1	Itgb1	3.65495e+09	4.62389e+09	2.97092e+09	3.61332e+09	5.64545e+09	5.2305e+09	5.76977e+09	6.04963e+09	5.26921e+09	6.42275e+09	5.43507e+09	5.64101e+09	4.71776e+09	4.46442e+09	4.13296e+09	4.82385e+09	6.67129e+09	7.06907e+09	6.68553e+09	6.81138e+09	31.7672	32.1065	31.4683	31.7507	32.3944	32.2843	32.4259	32.4942	32.2949	32.5805	32.3397	32.3933	32.1355	32.0558	31.9445	32.1675	32.6353	32.7189	32.6384	32.6653
P20029	GRP78_MOUSE	78 kDa glucose-regulated protein OS=Mus musculus GN=Hspa5 PE=1 SV=3	Hspa5 Grp78	1.29475e+09	1.19362e+09	1.30675e+09	1.2688e+09	1.15343e+09	1.31927e+09	1.2274e+09	1.21571e+09	1.32173e+09	1.22619e+09	1.25008e+09	1.34768e+09	1.2905e+09	1.39812e+09	1.36584e+09	1.34348e+09	1.31246e+09	1.26115e+09	1.34211e+09	1.29852e+09	30.27	30.1527	30.2833	30.2408	30.1033	30.2971	30.193	30.1791	30.2998	30.1915	30.2194	30.3278	30.2653	30.3808	30.3471	30.3233	30.2896	30.2321	30.3219	30.2742
P10852	4F2_MOUSE	4F2 cell-surface antigen heavy chain OS=Mus musculus GN=Slc3a2 PE=1 SV=1	Slc3a2 Mdu1	7.18239e+08	7.44645e+08	5.88419e+08	7.21378e+08	1.03339e+09	9.09344e+08	9.59765e+08	1.01676e+09	1.02532e+09	1.17167e+09	1.08261e+09	1.10758e+09	8.77081e+08	7.48338e+08	7.83537e+08	7.01678e+08	1.16471e+09	9.43798e+08	1.11575e+09	1.07381e+09	29.4199	29.472	29.1323	29.4262	29.9447	29.7603	29.8381	29.9213	29.9334	30.1259	30.0119	30.0448	29.7081	29.4791	29.5454	29.3862	30.1173	29.8139	30.0554	30.0001
P62880	GBB2_MOUSE	Guanine nucleotide-binding protein G(I)/G(S)/G(T) subunit beta-2 OS=Mus musculus GN=Gnb2 PE=1 SV=3	Gnb2	1.36815e+08	1.89111e+08	1.08065e+08	1.70563e+08	2.02665e+08	1.81981e+08	2.11222e+08	1.71281e+08	1.59116e+08	1.79491e+08	1.64002e+08	1.44456e+08	1.34506e+08	1.27295e+08	1.42747e+08	1.22398e+08	1.73461e+08	1.70068e+08	1.67564e+08	1.83178e+08	27.0277	27.4947	26.6873	27.3457	27.5945	27.4392	27.6542	27.3518	27.2455	27.4193	27.2891	27.1061	27.0031	26.9236	27.0889	26.867	27.37	27.3415	27.3201	27.4487
Q8VDN2	AT1A1_MOUSE	Sodium/potassium-transporting ATPase subunit alpha-1 OS=Mus musculus GN=Atp1a1 PE=1 SV=1	Atp1a1	1.37028e+11	1.28428e+11	1.35689e+11	1.34074e+11	1.03632e+11	1.24542e+11	1.10047e+11	9.6896e+10	1.53092e+11	1.53711e+11	1.43104e+11	1.29639e+11	1.60134e+11	1.37564e+11	1.38411e+11	1.27089e+11	1.47347e+11	1.01561e+11	1.25478e+11	1.41879e+11	36.9957	36.9022	36.9815	36.9642	36.5927	36.8578	36.6793	36.4957	37.1556	37.1614	37.0583	36.9157	37.2205	37.0013	37.0102	36.887	37.1004	36.5636	36.8686	37.0459
P68254	1433T_MOUSE	14-3-3 protein theta OS=Mus musculus GN=Ywhaq PE=1 SV=1	Ywhaq	1.93865e+08	2.12029e+08	1.8159e+08	2.11695e+08	2.38227e+08	2.1949e+08	2.43361e+08	1.88241e+08	2.29293e+08	2.18068e+08	2.45012e+08	1.94935e+08	2.14411e+08	2.07968e+08	2.288e+08	2.1827e+08	2.30556e+08	2.58095e+08	2.67416e+08	2.48321e+08	27.5305	27.6597	27.4361	27.6574	27.8278	27.7096	27.8585	27.488	27.7726	27.7002	27.8683	27.5384	27.6758	27.6318	27.7695	27.7015	27.7805	27.9433	27.9945	27.8876
P80314	TCPB_MOUSE	T-complex protein 1 subunit beta OS=Mus musculus GN=Cct2 PE=1 SV=4	Cct2 Cctb	3.92633e+08	4.21816e+08	4.01461e+08	4.03543e+08	3.72066e+08	4.20891e+08	4.10888e+08	3.99602e+08	4.55569e+08	4.85239e+08	4.7868e+08	4.60422e+08	4.43611e+08	4.50801e+08	4.5823e+08	4.45765e+08	5.02241e+08	5.32625e+08	5.10343e+08	5.39244e+08	28.5486	28.652	28.5807	28.5881	28.471	28.6489	28.6142	28.574	28.7631	28.8541	28.8345	28.7784	28.7247	28.7479	28.7715	28.7317	28.9038	28.9885	28.9269	29.0064
Q6GQT1	A2MP_MOUSE	Alpha-2-macroglobulin-P OS=Mus musculus GN=A2mp PE=2 SV=2	A2m A2mp	1.58801e+11	1.51123e+11	1.71891e+11	1.51855e+11	1.17932e+11	1.55931e+11	1.50061e+11	1.19505e+11	1.63893e+11	1.58064e+11	1.57118e+11	1.75804e+11	1.52888e+11	1.61771e+11	1.90433e+11	1.59054e+11	1.50675e+11	1.49271e+11	1.42271e+11	1.60478e+11	37.2084	37.1369	37.3227	37.1439	36.7792	37.1821	37.1268	36.7983	37.254	37.2017	37.1931	37.3552	37.1537	37.2352	37.4705	37.2107	37.1327	37.1191	37.0499	37.2236
P61982	1433G_MOUSE	14-3-3 protein gamma OS=Mus musculus GN=Ywhag PE=1 SV=2	Ywhag	1.6195e+08	2.14969e+08	1.69314e+08	1.78471e+08	2.07012e+08	2.24073e+08	2.32337e+08	2.13127e+08	1.78575e+08	2.25839e+08	1.90515e+08	1.83654e+08	1.79163e+08	1.81882e+08	1.82486e+08	1.73451e+08	1.93666e+08	2.26598e+08	1.91916e+08	2.29466e+08	27.271	27.6796	27.3351	27.4111	27.6251	27.7394	27.7916	27.6671	27.412	27.7507	27.5053	27.4524	27.4167	27.4384	27.4432	27.37	27.529	27.7556	27.5159	27.7737
Q07797	LG3BP_MOUSE	Galectin-3-binding protein OS=Mus musculus GN=Lgals3bp PE=1 SV=1	Lgals3bp Cycap Mama	1.71925e+08	1.5277e+08	1.56857e+08	1.41593e+08	1.13884e+08	1.2704e+08	1.15063e+08	1.17735e+08	1.59455e+08	1.35948e+08	1.27319e+08	1.61787e+08	1.4746e+08	1.66575e+08	1.47492e+08	1.63989e+08	1.55914e+08	1.26729e+08	1.37101e+08	1.47621e+08	27.3572	27.1868	27.2249	27.0772	26.763	26.9207	26.7779	26.811	27.2486	27.0185	26.9239	27.2695	27.1357	27.3116	27.1361	27.289	27.2162	26.9172	27.0307	27.1373
P21956	MFGM_MOUSE	Lactadherin OS=Mus musculus GN=Mfge8 PE=1 SV=3	Mfge8	3.49195e+09	4.12855e+09	2.87277e+09	3.51891e+09	3.55442e+09	3.10807e+09	3.32348e+09	3.42358e+09	5.35917e+09	5.57268e+09	5.26354e+09	5.57251e+09	2.79943e+09	2.40643e+09	2.51447e+09	2.41417e+09	5.48154e+09	4.67014e+09	5.20836e+09	4.87959e+09	31.7014	31.943	31.4198	31.7125	31.727	31.5334	31.63	31.6729	32.3194	32.3757	32.2934	32.3757	31.3825	31.1643	31.2276	31.1689	32.3519	32.1208	32.2782	32.1841
Q61598	GDIB_MOUSE	Rab GDP dissociation inhibitor beta OS=Mus musculus GN=Gdi2 PE=1 SV=1	Gdi2 Gdi3	9.69737e+08	8.31024e+08	1.01145e+09	9.68935e+08	8.82295e+08	8.91354e+08	8.80695e+08	7.78781e+08	1.01475e+09	8.88962e+08	1.01977e+09	1.01576e+09	1.01208e+09	1.05291e+09	1.05219e+09	1.01323e+09	9.19224e+08	7.63613e+08	9.80629e+08	8.86841e+08	29.853	29.6303	29.9138	29.8518	29.7167	29.7314	29.7141	29.5366	29.9185	29.7275	29.9256	29.9199	29.9147	29.9717	29.9707	29.9163	29.7758	29.5083	29.8691	29.7241
Q9CQV8	1433B_MOUSE	14-3-3 protein beta/alpha OS=Mus musculus GN=Ywhab PE=1 SV=3	Ywhab	2.00395e+08	2.29594e+08	2.05752e+08	2.02161e+08	2.21776e+08	2.324e+08	2.29974e+08	2.30238e+08	1.98443e+08	2.11393e+08	2.04726e+08	2.26956e+08	2.27424e+08	2.19385e+08	2.24715e+08	2.00465e+08	2.26372e+08	2.20172e+08	2.20207e+08	2.37638e+08	27.5783	27.7745	27.6163	27.5909	27.7245	27.792	27.7769	27.7785	27.5642	27.6554	27.6091	27.7578	27.7608	27.7089	27.7435	27.5788	27.7541	27.7141	27.7143	27.8242
Q6R0H7	GNAS1_MOUSE	Guanine nucleotide-binding protein G(s) subunit alpha isoforms XLas OS=Mus musculus GN=Gnas PE=2 SV=1	Gnas Gnas1	9.67316e+08	1.14459e+09	9.25132e+08	9.96741e+08	9.46094e+08	1.07542e+09	1.00716e+09	1.02073e+09	1.08242e+09	1.15563e+09	1.01088e+09	1.12654e+09	1.05003e+09	1.02373e+09	1.0937e+09	9.387e+08	1.0969e+09	1.06448e+09	1.09009e+09	1.13877e+09	29.8494	30.0922	29.7851	29.8926	29.8174	30.0023	29.9076	29.927	30.0116	30.106	29.913	30.0693	29.9678	29.9312	30.0266	29.8061	30.0308	29.9875	30.0218	30.0848
Q62351	TFR1_MOUSE	Transferrin receptor protein 1 OS=Mus musculus GN=Tfrc PE=1 SV=1	Tfrc Trfr	1.08448e+09	1.29779e+09	8.80223e+08	1.12672e+09	1.62086e+09	1.32488e+09	1.52439e+09	1.43842e+09	1.53331e+09	1.68629e+09	1.53792e+09	1.44999e+09	1.36375e+09	1.19586e+09	1.22493e+09	1.13745e+09	1.69655e+09	1.53967e+09	1.50075e+09	1.64139e+09	30.0144	30.2734	29.7133	30.0695	30.5941	30.3032	30.5056	30.4218	30.514	30.6512	30.5183	30.4334	30.3449	30.1554	30.1901	30.0832	30.66	30.52	30.483	30.6123
P97384	ANX11_MOUSE	Annexin A11 OS=Mus musculus GN=Anxa11 PE=1 SV=2	Anxa11 Anx11	1.64318e+09	1.17793e+09	1.81459e+09	1.94019e+09	1.16012e+09	1.42724e+09	1.77669e+09	1.15599e+09	1.69548e+09	1.30447e+09	1.64676e+09	1.51676e+09	1.11057e+09	1.85017e+09	1.70407e+09	1.77152e+09	9.22177e+08	1.3033e+09	1.65898e+09	1.45819e+09	30.6138	30.1336	30.757	30.8535	30.1116	30.4106	30.7265	30.1065	30.6591	30.2808	30.617	30.4983	30.0487	30.785	30.6663	30.7223	29.7805	30.2795	30.6277	30.4415
P70168	IMB1_MOUSE	Importin subunit beta-1 OS=Mus musculus GN=Kpnb1 PE=1 SV=2	Kpnb1 Impnb	3.02904e+08	3.04989e+08	3.17417e+08	3.33986e+08	2.9579e+08	2.98785e+08	3.26325e+08	3.09065e+08	2.83e+08	3.09173e+08	3.05429e+08	3.22017e+08	2.96571e+08	2.94319e+08	3.00984e+08	3.01776e+08	2.90683e+08	3.34676e+08	2.97995e+08	2.83549e+08	28.1743	28.1842	28.2418	28.3152	28.14	28.1545	28.2817	28.2033	28.0762	28.2038	28.1863	28.2626	28.1438	28.1328	28.1651	28.1689	28.1149	28.3182	28.1507	28.079
P26040	EZRI_MOUSE	Ezrin OS=Mus musculus GN=Ezr PE=1 SV=3	Ezr Vil2	2.07466e+08	2.28379e+08	1.73962e+08	2.08965e+08	2.52951e+08	2.19646e+08	2.29794e+08	2.55617e+08	2.13955e+08	2.52335e+08	2.28511e+08	2.26707e+08	2.22232e+08	2.04973e+08	2.15732e+08	1.85489e+08	2.50437e+08	2.69864e+08	3.15997e+08	2.96078e+08	27.6283	27.7669	27.3742	27.6387	27.9143	27.7106	27.7758	27.9294	27.6727	27.9108	27.7677	27.7563	27.7275	27.6109	27.6847	27.4668	27.8999	28.0077	28.2353	28.1414
P62874	GBB1_MOUSE	Guanine nucleotide-binding protein G(I)/G(S)/G(T) subunit beta-1 OS=Mus musculus GN=Gnb1 PE=1 SV=3	Gnb1	3.17244e+08	1.94478e+08	3.1299e+08	2.5059e+08	2.5534e+08	2.60639e+08	1.87941e+08	2.43946e+08	3.02328e+08	2.65694e+08	2.81067e+08	3.58664e+08	2.65957e+08	2.91297e+08	3.04006e+08	3.08709e+08	3.06132e+08	2.48458e+08	2.48867e+08	2.70585e+08	28.241	27.535	28.2215	27.9008	27.9278	27.9575	27.4857	27.862	28.1715	27.9852	28.0663	28.4181	27.9866	28.1179	28.1795	28.2017	28.1896	27.8884	27.8908	28.0115
P35441	TSP1_MOUSE	Thrombospondin-1 OS=Mus musculus GN=Thbs1 PE=1 SV=1	Thbs1 Tsp1	2.22111e+10	2.84773e+10	2.25708e+10	2.34098e+10	3.60313e+10	3.16981e+10	4.31471e+10	4.56533e+10	2.05919e+10	2.10716e+10	1.95195e+10	1.94905e+10	2.11667e+10	2.08763e+10	1.96292e+10	2.18619e+10	1.8438e+10	1.89556e+10	1.83875e+10	2.00231e+10	34.3706	34.7291	34.3937	34.4464	35.0685	34.8837	35.3285	35.41	34.2614	34.2946	34.1842	34.1821	34.3011	34.2811	34.1923	34.3477	34.102	34.1419	34.098	34.2209
Q9WV91	FPRP_MOUSE	Prostaglandin F2 receptor negative regulator OS=Mus musculus GN=Ptgfrn PE=1 SV=2	Ptgfrn Fprp	3.29098e+09	3.56271e+09	2.91848e+09	3.44497e+09	6.87417e+09	5.96562e+09	7.15624e+09	6.99878e+09	4.41042e+09	4.86802e+09	4.48714e+09	4.44535e+09	4.29275e+09	3.7607e+09	3.64147e+09	3.29599e+09	4.91547e+09	3.96074e+09	4.36242e+09	4.53988e+09	31.6159	31.7303	31.4426	31.6818	32.6785	32.474	32.7366	32.7045	32.0383	32.1807	32.0631	32.0496	31.9993	31.8084	31.7619	31.6181	32.1947	31.8831	32.0225	32.08
P80316	TCPE_MOUSE	T-complex protein 1 subunit epsilon OS=Mus musculus GN=Cct5 PE=1 SV=1	Cct5 Ccte Kiaa0098	2.6295e+09	2.68571e+09	2.50073e+09	2.62757e+09	2.03646e+09	2.58077e+09	2.8323e+09	2.08212e+09	3.20249e+09	2.66774e+09	2.62285e+09	2.67344e+09	2.89002e+09	2.84819e+09	3.03912e+09	2.65326e+09	2.86812e+09	3.32026e+09	2.6874e+09	3.81473e+09	31.2921	31.3227	31.2197	31.2911	30.9234	31.2652	31.3993	30.9554	31.5765	31.313	31.2885	31.316	31.4284	31.4074	31.501	31.3051	31.4175	31.6286	31.3236	31.8289
P80318	TCPG_MOUSE	T-complex protein 1 subunit gamma OS=Mus musculus GN=Cct3 PE=1 SV=1	Cct3 Cctg	1.71837e+09	2.02501e+09	1.94566e+09	2.00942e+09	1.97641e+09	1.76832e+09	1.68206e+09	1.8216e+09	1.81259e+09	1.94683e+09	1.96352e+09	1.99728e+09	1.76544e+09	1.93432e+09	1.73629e+09	1.92448e+09	2.11724e+09	2.42679e+09	2.38427e+09	2.29452e+09	30.6784	30.9153	30.8576	30.9041	30.8802	30.7197	30.6476	30.7626	30.7554	30.8585	30.8708	30.8954	30.7174	30.8492	30.6934	30.8418	30.9795	31.1764	31.1509	31.0955
P18572	BASI_MOUSE	Basigin OS=Mus musculus GN=Bsg PE=1 SV=2	Bsg	2.07471e+08	1.99073e+08	1.73809e+08	1.97807e+08	2.93328e+08	2.59139e+08	2.5817e+08	2.80719e+08	2.79058e+08	2.93012e+08	2.71573e+08	3.20307e+08	2.16721e+08	2.03413e+08	2.04747e+08	1.9784e+08	3.2826e+08	2.3969e+08	3.11293e+08	2.93029e+08	27.6283	27.5687	27.3729	27.5595	28.1279	27.9491	27.9437	28.0646	28.056	28.1264	28.0168	28.2549	27.6913	27.5998	27.6093	27.5598	28.2903	27.8366	28.2137	28.1265
P50247	SAHH_MOUSE	Adenosylhomocysteinase OS=Mus musculus GN=Ahcy PE=1 SV=3	Ahcy	1.5482e+10	1.78965e+10	1.60672e+10	1.7182e+10	1.49322e+10	1.67512e+10	1.70286e+10	1.48745e+10	1.78193e+10	1.8032e+10	1.78431e+10	1.65164e+10	1.83955e+10	1.75816e+10	1.86273e+10	1.7301e+10	1.68578e+10	1.70572e+10	1.65155e+10	1.74353e+10	33.8499	34.059	33.9034	34.0002	33.7977	33.9635	33.9872	33.7921	34.0527	34.0698	34.0546	33.9432	34.0986	34.0333	34.1167	34.0101	33.9727	33.9897	33.9431	34.0213
Q61739	ITA6_MOUSE	Integrin alpha-6 OS=Mus musculus GN=Itga6 PE=1 SV=3	Itga6	6.64434e+09	1.92009e+09	5.73364e+09	6.38949e+09	7.75018e+09	3.30712e+09	4.23153e+09	6.71147e+09	6.71386e+09	1.01681e+09	6.72775e+09	5.64125e+09	5.90013e+09	6.2389e+09	5.68557e+09	4.55103e+09	5.09931e+09	7.29328e+08	6.6448e+09	1.71479e+09	32.6295	30.8385	32.4168	32.5731	32.8516	31.6229	31.9785	32.644	32.6445	29.9214	32.6475	32.3934	32.4581	32.5386	32.4047	32.0835	32.2477	29.442	32.6296	30.6754
P13020	GELS_MOUSE	Gelsolin OS=Mus musculus GN=Gsn PE=1 SV=3	Gsn Gsb	1.74057e+09	1.99235e+09	1.71234e+09	1.69879e+09	1.91256e+09	1.78851e+09	1.71929e+09	1.9478e+09	1.74197e+09	1.93204e+09	1.81252e+09	1.78232e+09	1.83836e+09	1.72151e+09	1.75881e+09	1.74663e+09	1.8193e+09	1.94704e+09	1.73415e+09	1.84865e+09	30.6969	30.8918	30.6733	30.6619	30.8329	30.7361	30.6792	30.8592	30.6981	30.8475	30.7553	30.7311	30.7758	30.681	30.712	30.7019	30.7607	30.8586	30.6916	30.7838
P11276	FINC_MOUSE	Fibronectin OS=Mus musculus GN=Fn1 PE=1 SV=4	Fn1	9.95436e+10	1.35248e+11	8.71377e+10	1.10928e+11	1.49022e+11	9.38975e+10	1.84266e+11	2.12417e+11	5.16386e+10	6.15117e+10	5.82285e+10	4.37892e+10	7.80576e+10	7.88134e+10	6.90197e+10	9.16878e+10	6.48632e+10	1.33198e+11	1.19409e+11	6.86119e+10	36.5346	36.9768	36.3426	36.6908	37.1167	36.4504	37.423	37.6281	35.5877	35.8401	35.761	35.3499	36.1838	36.1977	36.0063	36.416	35.9167	36.9548	36.7971	35.9977
P68510	1433F_MOUSE	14-3-3 protein eta OS=Mus musculus GN=Ywhah PE=1 SV=2	Ywhah	2.94883e+08	3.22934e+08	2.84533e+08	3.13452e+08	2.60495e+08	3.00471e+08	3.64412e+08	2.86177e+08	2.63689e+08	2.78524e+08	2.5832e+08	2.83121e+08	2.95785e+08	2.874e+08	3.15969e+08	2.98303e+08	2.54526e+08	3.56803e+08	2.16379e+08	3.06707e+08	28.1356	28.2667	28.084	28.2237	27.9567	28.1627	28.441	28.0923	27.9743	28.0532	27.9446	28.0768	28.14	28.0985	28.2352	28.1522	27.9232	28.4106	27.689	28.1923
P68369	TBA1A_MOUSE	Tubulin alpha-1A chain OS=Mus musculus GN=Tuba1a PE=1 SV=1	Tuba1a Tuba1	1.45719e+08	7.73127e+07	1.33123e+08	1.21635e+08	9.31554e+07	9.37301e+07	7.88377e+07	1.03668e+08	1.2591e+08	8.07998e+07	1.08584e+08	1.41934e+08	1.39805e+08	1.31714e+08	1.11252e+08	1.33951e+08	1.31046e+08	6.21599e+07	1.11901e+08	7.52635e+07	27.1186	26.2042	26.9882	26.858	26.4731	26.482	26.2324	26.6274	26.9078	26.2678	26.6942	27.0806	27.0588	26.9728	26.7293	26.9971	26.9655	25.8895	26.7376	26.1654
P11983	TCPA_MOUSE	T-complex protein 1 subunit alpha OS=Mus musculus GN=Tcp1 PE=1 SV=3	Tcp1 Cct1 Ccta	6.13988e+08	6.64072e+08	5.9209e+08	7.17717e+08	5.97406e+08	5.9441e+08	6.555e+08	5.79301e+08	6.7432e+08	7.07134e+08	6.9752e+08	6.3004e+08	5.89528e+08	6.47345e+08	6.88342e+08	6.23603e+08	7.10129e+08	8.1228e+08	8.64675e+08	7.76633e+08	29.1936	29.3068	29.1412	29.4188	29.1541	29.1469	29.288	29.1097	29.3289	29.3974	29.3777	29.2309	29.135	29.27	29.3586	29.2161	29.4035	29.5974	29.6876	29.5327
P53986	MOT1_MOUSE	Monocarboxylate transporter 1 OS=Mus musculus GN=Slc16a1 PE=1 SV=1	Slc16a1 Mct1	1.61037e+08	2.11924e+08	1.27018e+08	1.71632e+08	2.83126e+08	2.31852e+08	2.94286e+08	2.83245e+08	2.70382e+08	3.24427e+08	2.79957e+08	2.89282e+08	1.949e+08	1.78142e+08	1.8319e+08	1.61499e+08	3.09015e+08	3.53042e+08	3.37262e+08	3.54558e+08	27.2628	27.659	26.9205	27.3547	28.0769	27.7886	28.1326	28.0775	28.0104	28.2733	28.0606	28.1079	27.5382	27.4084	27.4488	27.2669	28.2031	28.3953	28.3293	28.4014
P62806	H4_MOUSE	Histone H4 OS=Mus musculus GN=Hist1h4a PE=1 SV=2	H4c1 Hist1h4a; H4c2 H4-53 Hist1h4b; H4c3 H4-12 Hist1h4c; H4c4 Hist1h4d; H4c6 Hist1h4f; H4c8 Hist1h4h; H4c9 Hist1h4i; H4c11 Hist1h4j; H4c12 Hist1h4k; Hist1h4m; H4c14 Hist2h4 Hist2h4a; H4f16 Hist4h4	1.41738e+10	1.72376e+10	8.9275e+09	1.50707e+10	2.41082e+10	1.84983e+10	2.27183e+10	2.68699e+10	2.59043e+10	3.3724e+10	2.53349e+10	2.4574e+10	1.76342e+10	2.56383e+10	1.28678e+10	2.23577e+10	8.54109e+10	7.02764e+10	7.32136e+10	6.77708e+10	33.7225	34.0048	33.0556	33.811	34.4888	34.1067	34.4031	34.6453	34.5925	34.9731	34.5604	34.5164	34.0377	34.5776	33.583	34.3801	36.3137	36.0323	36.0914	35.9799
