# Supplementary material for: Comparative Proteomics Analysis of Exosomes Identifies Key Pathways and Protein Markers Related to Breast Cancer Metastasis
Source: Int J Mol Sci. 2023 Feb 17;24(4):4033. doi: 10.3390/ijms24044033 (PMC9967130; doi:10.3390/ijms24044033)
Supplement: Supplementary file 1 [file ijms-24-04033-s001.zip › Table S3 DisGeNet results.xlsx]

## Sheet: Table S3
Table S3	List of protein IDs associated with BC and metastasis identified by DisGeNet.
geneId	geneSymbol	DSI	DPI	diseaseId	diseaseName	diseaseType	diseaseClass	diseaseSemanticType	score	EI	YearInitial	YearFinal	NofPmids	NofSnps	source
695	BTK	0.464	0.808	C0858252	Breast adenocarcinoma	disease	C04;C17	Neoplastic Process	0.3				0	0	CGI
2066	ERBB4	0.455	0.846	C0858252	Breast adenocarcinoma	disease	C04;C17	Neoplastic Process	0.3				0	0	CGI
2260	FGFR1	0.362	0.885	C0858252	Breast adenocarcinoma	disease	C04;C17	Neoplastic Process	0.3				0	0	CGI
3845	KRAS	0.32	0.923	C0858252	Breast adenocarcinoma	disease	C04;C17	Neoplastic Process	0.41	0	2019	2019	0	1	CGI
4851	NOTCH1	0.369	0.885	C0858252	Breast adenocarcinoma	disease	C04;C17	Neoplastic Process	0.3				0	0	CGI
4853	NOTCH2	0.441	0.808	C0858252	Breast adenocarcinoma	disease	C04;C17	Neoplastic Process	0.3				0	0	CGI
5291	PIK3CB	0.322	0.885	C0858252	Breast adenocarcinoma	disease	C04;C17	Neoplastic Process	0.3				0	0	CGI
7157	TP53	0.236	0.962	C0858252	Breast adenocarcinoma	disease	C04;C17	Neoplastic Process	0.46	1	1995	2017	0	1	CGI
9175	MAP3K13	0.743	0.192	C0858252	Breast adenocarcinoma	disease	C04;C17	Neoplastic Process	0.3				0	0	CGI
999	CDH1	0.401	0.808	C0346153	Breast Cancer, Familial	disease	C04;C17	Neoplastic Process	0.31	1	1991	2018	12	0	CLINGEN
4072	EPCAM	0.451	0.885	C0346153	Breast Cancer, Familial	disease	C04;C17	Neoplastic Process	0.3				0	0	CLINGEN
4436	MSH2	0.406	0.808	C0346153	Breast Cancer, Familial	disease	C04;C17	Neoplastic Process	0.31	1	2003	2017	2	0	CLINGEN
10	NAT2	0.451	0.885	C0678222	Breast Carcinoma	disease	C04;C17	Neoplastic Process	0.4	0.863	1996	2018	1	0	CTD_human
102	ADAM10	0.489	0.846	C0678222	Breast Carcinoma	disease	C04;C17	Neoplastic Process	0.4	1	1997	2020	1	0	CTD_human
226	ALDOA	0.631	0.615	C0678222	Breast Carcinoma	disease	C04;C17	Neoplastic Process	0.3	1	2010	2010	1	0	CTD_human
353	APRT	0.423	0.846	C0678222	Breast Carcinoma	disease	C04;C17	Neoplastic Process	0.4	1	1988	2018	1	0	CTD_human
396	ARHGDIA	0.663	0.577	C0678222	Breast Carcinoma	disease	C04;C17	Neoplastic Process	0.32	1	2010	2014	1	0	CTD_human
695	BTK	0.464	0.808	C0678222	Breast Carcinoma	disease	C04;C17	Neoplastic Process	0.32	1	2013	2016	0	0	CGI
847	CAT	0.359	0.962	C0678222	Breast Carcinoma	disease	C04;C17	Neoplastic Process	0.4	0.964	1987	2019	1	0	CTD_human
857	CAV1	0.388	0.885	C0678222	Breast Carcinoma	disease	C04;C17	Neoplastic Process	0.4	0.963	1999	2019	4	0	CTD_human
999	CDH1	0.401	0.808	C0678222	Breast Carcinoma	disease	C04;C17	Neoplastic Process	0.5	1	1991	2019	4	0	CTD_human
1003	CDH5	0.561	0.692	C0678222	Breast Carcinoma	disease	C04;C17	Neoplastic Process	0.37	1	2000	2018	1	0	CTD_human
1072	CFL1	0.529	0.769	C0678222	Breast Carcinoma	disease	C04;C17	Neoplastic Process	0.35	1	1998	2018	1	0	CTD_human
1192	CLIC1	0.601	0.5	C0678222	Breast Carcinoma	disease	C04;C17	Neoplastic Process	0.3	1	2010	2010	1	0	CTD_human
1312	COMT	0.4	0.923	C0678222	Breast Carcinoma	disease	C04;C17	Neoplastic Process	0.4	0.825	1997	2019	3	0	CTD_human
1364	CLDN4	0.514	0.692	C0678222	Breast Carcinoma	disease	C04;C17	Neoplastic Process	0.4	1	2005	2019	1	0	CTD_human
1499	CTNNB1	0.303	0.885	C0678222	Breast Carcinoma	disease	C04;C17	Neoplastic Process	0.5	0.964	1995	2020	2	0	CTD_human
1719	DHFR	0.513	0.808	C0678222	Breast Carcinoma	disease	C04;C17	Neoplastic Process	0.39	0.9	1985	2018	2	0	CTD_human
1806	DPYD	0.493	0.846	C0678222	Breast Carcinoma	disease	C04;C17	Neoplastic Process	0.36	1	2004	2017	1	0	CTD_human
1938	EEF2	0.599	0.731	C0678222	Breast Carcinoma	disease	C04;C17	Neoplastic Process	0.3	1	2010	2010	1	0	CTD_human
1956	EGFR	0.295	0.885	C0678222	Breast Carcinoma	disease	C04;C17	Neoplastic Process	0.4	0.974	1987	2020	6	0	CTD_human
2023	ENO1	0.481	0.885	C0678222	Breast Carcinoma	disease	C04;C17	Neoplastic Process	0.37	1	1995	2019	1	0	CTD_human
2050	EPHB4	0.524	0.692	C0678222	Breast Carcinoma	disease	C04;C17	Neoplastic Process	0.4	1	2002	2019	1	0	CTD_human
2066	ERBB4	0.455	0.846	C0678222	Breast Carcinoma	disease	C04;C17	Neoplastic Process	0.5	1	1995	2019	0	1	CGI
2146	EZH2	0.376	0.885	C0678222	Breast Carcinoma	disease	C04;C17	Neoplastic Process	0.4	0.977	2003	2020	1	0	CTD_human
2152	F3	0.415	0.846	C0678222	Breast Carcinoma	disease	C04;C17	Neoplastic Process	0.4	0.929	1993	2018	1	0	CTD_human
2194	FASN	0.474	0.846	C0678222	Breast Carcinoma	disease	C04;C17	Neoplastic Process	0.4	0.981	1997	2019	2	0	CTD_human
2202	EFEMP1	0.54	0.769	C0678222	Breast Carcinoma	disease	C04;C17	Neoplastic Process	0.32	1	2009	2015	1	0	CTD_human
2260	FGFR1	0.362	0.885	C0678222	Breast Carcinoma	disease	C04;C17	Neoplastic Process	0.6	0.977	1994	2020	2	0	CGI;CTD_human
2316	FLNA	0.419	0.846	C0678222	Breast Carcinoma	disease	C04;C17	Neoplastic Process	0.37	1	1990	2018	1	0	CTD_human
2335	FN1	0.365	0.962	C0678222	Breast Carcinoma	disease	C04;C17	Neoplastic Process	0.4	1	1997	2020	1	0	CTD_human
2697	GJA1	0.393	0.885	C0678222	Breast Carcinoma	disease	C04;C17	Neoplastic Process	0.4	1	2000	2019	1	0	CTD_human
2771	GNAI2	0.636	0.577	C0678222	Breast Carcinoma	disease	C04;C17	Neoplastic Process	0.3	1	2009	2009	1	0	CTD_human
2821	GPI	0.491	0.769	C0678222	Breast Carcinoma	disease	C04;C17	Neoplastic Process	0.4	1	2000	2017	1	0	CTD_human
2876	GPX1	0.458	0.923	C0678222	Breast Carcinoma	disease	C04;C17	Neoplastic Process	0.4	0.889	1995	2019	1	0	CTD_human
2950	GSTP1	0.383	0.923	C0678222	Breast Carcinoma	disease	C04;C17	Neoplastic Process	0.4	0.898	1997	2019	1	0	CTD_human
3190	HNRNPK	0.539	0.846	C0678222	Breast Carcinoma	disease	C04;C17	Neoplastic Process	0.31	1	2001	2011	1	0	CTD_human
3191	HNRNPL	0.663	0.5	C0678222	Breast Carcinoma	disease	C04;C17	Neoplastic Process	0.31	1	2011	2019	1	0	CTD_human
3240	HP	0.412	0.885	C0678222	Breast Carcinoma	disease	C04;C17	Neoplastic Process	0.36	1	1980	2017	1	0	CTD_human
3304	HSPA1B	0.474	0.808	C0678222	Breast Carcinoma	disease	C04;C17	Neoplastic Process	0.33	1	1997	2012	1	0	CTD_human
3320	HSP90AA1	0.411	0.923	C0678222	Breast Carcinoma	disease	C04;C17	Neoplastic Process	0.4	1	1992	2020	1	0	CTD_human
3479	IGF1	0.318	0.885	C0678222	Breast Carcinoma	disease	C04;C17	Neoplastic Process	0.4	0.959	1986	2020	2	0	CTD_human
3480	IGF1R	0.399	0.885	C0678222	Breast Carcinoma	disease	C04;C17	Neoplastic Process	0.4	1	1994	2019	1	0	CTD_human
3490	IGFBP7	0.476	0.769	C0678222	Breast Carcinoma	disease	C04;C17	Neoplastic Process	0.38	1	1998	2017	1	0	CTD_human
3692	EIF6	0.584	0.538	C0678222	Breast Carcinoma	disease	C04;C17	Neoplastic Process	0.3	1	2014	2014	1	0	CTD_human
3714	JAG2	0.576	0.846	C0678222	Breast Carcinoma	disease	C04;C17	Neoplastic Process	0.31	1	2010	2011	1	0	CTD_human
3845	KRAS	0.32	0.923	C0678222	Breast Carcinoma	disease	C04;C17	Neoplastic Process	0.7	0.95	1987	2020	0	0	CGI;CTD_human
3852	KRT5	0.512	0.731	C0678222	Breast Carcinoma	disease	C04;C17	Neoplastic Process	0.4	1	2004	2019	1	0	CTD_human
3856	KRT8	0.517	0.654	C0678222	Breast Carcinoma	disease	C04;C17	Neoplastic Process	0.5	0.917	1995	2019	1	1	CTD_human
3861	KRT14	0.53	0.731	C0678222	Breast Carcinoma	disease	C04;C17	Neoplastic Process	0.4	1	2004	2018	1	0	CTD_human
3875	KRT18	0.53	0.692	C0678222	Breast Carcinoma	disease	C04;C17	Neoplastic Process	0.37	1	1995	2019	2	0	CTD_human
3945	LDHB	0.604	0.615	C0678222	Breast Carcinoma	disease	C04;C17	Neoplastic Process	0.34	1	2012	2018	1	0	CTD_human
4017	LOXL2	0.527	0.731	C0678222	Breast Carcinoma	disease	C04;C17	Neoplastic Process	0.4	1	2003	2019	2	0	CTD_human
4240	MFGE8	0.548	0.808	C0678222	Breast Carcinoma	disease	C04;C17	Neoplastic Process	0.37	1	2000	2019	1	0	CTD_human
4282	MIF	0.412	0.885	C0678222	Breast Carcinoma	disease	C04;C17	Neoplastic Process	0.38	1	2002	2017	1	0	CTD_human
4548	MTR	0.482	0.808	C0678222	Breast Carcinoma	disease	C04;C17	Neoplastic Process	0.4	0.857	2007	2017	1	0	CTD_human
4627	MYH9	0.505	0.808	C0678222	Breast Carcinoma	disease	C04;C17	Neoplastic Process	0.34	1	2008	2018	1	0	CTD_human
4660	PPP1R12B	0.769	0.269	C0678222	Breast Carcinoma	disease	C04;C17	Neoplastic Process	0.3	1	2017	2017	1	0	CTD_human
4851	NOTCH1	0.369	0.885	C0678222	Breast Carcinoma	disease	C04;C17	Neoplastic Process	0.6	1	2004	2020	2	0	CGI;CTD_human
4853	NOTCH2	0.441	0.808	C0678222	Breast Carcinoma	disease	C04;C17	Neoplastic Process	0.68	1	2004	2019	1	1	CGI;CTD_human
4854	NOTCH3	0.435	0.808	C0678222	Breast Carcinoma	disease	C04;C17	Neoplastic Process	0.4	1	2007	2020	1	0	CTD_human
4904	YBX1	0.519	0.769	C0678222	Breast Carcinoma	disease	C04;C17	Neoplastic Process	0.4	0.967	2002	2019	1	0	CTD_human
5154	PDGFA	0.533	0.731	C0678222	Breast Carcinoma	disease	C04;C17	Neoplastic Process	0.31	1	2005	2015	1	0	CTD_human
5291	PIK3CB	0.322	0.885	C0678222	Breast Carcinoma	disease	C04;C17	Neoplastic Process	0.4	0.992	2001	2020	0	0	CGI
5321	PLA2G4A	0.496	0.846	C0678222	Breast Carcinoma	disease	C04;C17	Neoplastic Process	0.35	1	2010	2019	1	0	CTD_human
5789	PTPRD	0.584	0.731	C0678222	Breast Carcinoma	disease	C04;C17	Neoplastic Process	0.41	1	2008	2017	1	1	CTD_human
5819	NECTIN2	0.575	0.769	C0678222	Breast Carcinoma	disease	C04;C17	Neoplastic Process	0.3	1	2013	2013	1	0	CTD_human
5935	RBM3	0.595	0.654	C0678222	Breast Carcinoma	disease	C04;C17	Neoplastic Process	0.36	1	2006	2019	1	0	CTD_human
6147	RPL23A	0.78	0.308	C0678222	Breast Carcinoma	disease	C04;C17	Neoplastic Process	0.3	1	2011	2011	1	0	CTD_human
6160	RPL31	0.78	0.308	C0678222	Breast Carcinoma	disease	C04;C17	Neoplastic Process	0.3	1	2011	2011	1	0	CTD_human
6181	RPLP2	0.805	0.192	C0678222	Breast Carcinoma	disease	C04;C17	Neoplastic Process	0.3	1	2018	2018	1	0	CTD_human
6191	RPS4X	0.711	0.5	C0678222	Breast Carcinoma	disease	C04;C17	Neoplastic Process	0.32	1	2011	2017	1	0	CTD_human
6194	RPS6	0.547	0.692	C0678222	Breast Carcinoma	disease	C04;C17	Neoplastic Process	0.34	1	2008	2019	1	0	CTD_human
6201	RPS7	0.682	0.462	C0678222	Breast Carcinoma	disease	C04;C17	Neoplastic Process	0.3	1	2011	2011	1	0	CTD_human
6202	RPS8	0.805	0.192	C0678222	Breast Carcinoma	disease	C04;C17	Neoplastic Process	0.3	1	2011	2011	1	0	CTD_human
6387	CXCL12	0.379	0.846	C0678222	Breast Carcinoma	disease	C04;C17	Neoplastic Process	0.4	0.988	2003	2020	1	0	CTD_human
6470	SHMT1	0.566	0.654	C0678222	Breast Carcinoma	disease	C04;C17	Neoplastic Process	0.34	0.8	2007	2015	1	0	CTD_human
6513	SLC2A1	0.388	0.808	C0678222	Breast Carcinoma	disease	C04;C17	Neoplastic Process	0.4	0.969	2004	2019	1	0	CTD_human
6696	SPP1	0.353	0.885	C0678222	Breast Carcinoma	disease	C04;C17	Neoplastic Process	0.4	0.986	1997	2019	2	0	CTD_human
6714	SRC	0.467	0.885	C0678222	Breast Carcinoma	disease	C04;C17	Neoplastic Process	0.4	1	2001	2019	1	0	CTD_human
6774	STAT3	0.32	0.923	C0678222	Breast Carcinoma	disease	C04;C17	Neoplastic Process	0.4	0.99	1997	2020	1	0	CTD_human
6817	SULT1A1	0.554	0.769	C0678222	Breast Carcinoma	disease	C04;C17	Neoplastic Process	0.4	0.8	2000	2018	1	0	CTD_human
7037	TFRC	0.437	0.885	C0678222	Breast Carcinoma	disease	C04;C17	Neoplastic Process	0.4	1	1999	2019	2	0	CTD_human
7052	TGM2	0.445	0.808	C0678222	Breast Carcinoma	disease	C04;C17	Neoplastic Process	0.4	1	2001	2018	1	0	CTD_human
7057	THBS1	0.407	0.885	C0678222	Breast Carcinoma	disease	C04;C17	Neoplastic Process	0.4	1	1994	2019	1	0	CTD_human
7153	TOP2A	0.497	0.731	C0678222	Breast Carcinoma	disease	C04;C17	Neoplastic Process	0.4	0.971	1999	2019	4	0	CTD_human
7157	TP53	0.236	0.962	C0678222	Breast Carcinoma	disease	C04;C17	Neoplastic Process	0.9	0.971	1982	2020	6	0	CGI;CTD_human
7295	TXN	0.447	0.885	C0678222	Breast Carcinoma	disease	C04;C17	Neoplastic Process	0.4	1	2000	2018	1	0	CTD_human
7372	UMPS	0.584	0.615	C0678222	Breast Carcinoma	disease	C04;C17	Neoplastic Process	0.31	1	2008	2014	2	0	CTD_human
7424	VEGFC	0.459	0.769	C0678222	Breast Carcinoma	disease	C04;C17	Neoplastic Process	0.4	0.946	2001	2019	2	0	CTD_human
7913	DEK	0.542	0.769	C0678222	Breast Carcinoma	disease	C04;C17	Neoplastic Process	0.35	1	2007	2019	1	0	CTD_human
8065	CUL5	0.691	0.577	C0678222	Breast Carcinoma	disease	C04;C17	Neoplastic Process	0.33	1	2003	2019	1	0	CTD_human
8085	KMT2D	0.465	0.808	C0678222	Breast Carcinoma	disease	C04;C17	Neoplastic Process	0.34	1	2010	2019	1	0	CTD_human
8894	EIF2S2	0.621	0.577	C0678222	Breast Carcinoma	disease	C04;C17	Neoplastic Process	0.32	1	2008	2019	1	0	CTD_human
9076	CLDN1	0.481	0.808	C0678222	Breast Carcinoma	disease	C04;C17	Neoplastic Process	0.4	0.9	1999	2019	2	0	CTD_human
9175	MAP3K13	0.743	0.192	C0678222	Breast Carcinoma	disease	C04;C17	Neoplastic Process	0.32	1	1997	2017	0	0	CGI
9839	ZEB2	0.471	0.808	C0678222	Breast Carcinoma	disease	C04;C17	Neoplastic Process	0.4	1	2005	2019	1	0	CTD_human
10381	TUBB3	0.486	0.808	C0678222	Breast Carcinoma	disease	C04;C17	Neoplastic Process	0.39	1	2011	2019	1	0	CTD_human
10397	NDRG1	0.488	0.731	C0678222	Breast Carcinoma	disease	C04;C17	Neoplastic Process	0.4	1	2004	2019	1	0	CTD_human
10468	FST	0.513	0.731	C0678222	Breast Carcinoma	disease	C04;C17	Neoplastic Process	0.37	1	2005	2018	1	0	CTD_human
11009	IL24	0.498	0.769	C0678222	Breast Carcinoma	disease	C04;C17	Neoplastic Process	0.4	1	1998	2018	2	0	CTD_human
11041	B4GAT1	0.59	0.538	C0678222	Breast Carcinoma	disease	C04;C17	Neoplastic Process	0.3	1	2018	2018	1	0	CTD_human
22948	CCT5	0.663	0.462	C0678222	Breast Carcinoma	disease	C04;C17	Neoplastic Process	0.3	1	2008	2008	1	0	CTD_human
23345	SYNE1	0.511	0.846	C0678222	Breast Carcinoma	disease	C04;C17	Neoplastic Process	0.32	1	1997	2008	1	0	CTD_human
23411	SIRT1	0.378	0.885	C0678222	Breast Carcinoma	disease	C04;C17	Neoplastic Process	0.4	0.979	2010	2020	1	0	CTD_human
23705	CADM1	0.491	0.769	C0678222	Breast Carcinoma	disease	C04;C17	Neoplastic Process	0.37	0.714	2002	2019	1	0	CTD_human
26227	PHGDH	0.484	0.885	C0678222	Breast Carcinoma	disease	C04;C17	Neoplastic Process	0.5	0.917	2011	2019	1	1	CTD_human
26986	PABPC1	0.621	0.654	C0678222	Breast Carcinoma	disease	C04;C17	Neoplastic Process	0.31	1	1992	2011	1	0	CTD_human
51129	ANGPTL4	0.498	0.731	C0678222	Breast Carcinoma	disease	C04;C17	Neoplastic Process	0.34	1	2011	2019	1	0	CTD_human
79659	DYNC2H1	0.555	0.731	C0678222	Breast Carcinoma	disease	C04;C17	Neoplastic Process	0.3	1	2014	2014	1	0	CTD_human
133522	PPARGC1B	0.569	0.731	C0678222	Breast Carcinoma	disease	C04;C17	Neoplastic Process	0.39	1	2003	2019	1	0	CTD_human
135228	CD109	0.595	0.654	C0678222	Breast Carcinoma	disease	C04;C17	Neoplastic Process	0.3	1	2008	2008	1	0	CTD_human
404037	HAPLN4	0.805	0.154	C0678222	Breast Carcinoma	disease	C04;C17	Neoplastic Process	0.3	1	2018	2018	1	0	CTD_human
7157	TP53	0.236	0.962	C0677776	Hereditary Breast and Ovarian Cancer Syndrome	disease	C16;C04;C13;C17;C19	Neoplastic Process	0.5	0.941	1994	2019	2	2	ORPHANET
545	ATR	0.456	0.923	C3165106	Infiltrating duct carcinoma of female breast	disease	C04;C17	Neoplastic Process	0.3				0	0	UNIPROT
2260	FGFR1	0.362	0.885	C3165106	Infiltrating duct carcinoma of female breast	disease	C04;C17	Neoplastic Process	0.3				0	1	UNIPROT
7273	TTN	0.47	0.885	C3165106	Infiltrating duct carcinoma of female breast	disease	C04;C17	Neoplastic Process	0.3				0	0	UNIPROT
9578	CDC42BPB	0.76	0.385	C3165106	Infiltrating duct carcinoma of female breast	disease	C04;C17	Neoplastic Process	0.3				0	1	UNIPROT
23049	SMG1	0.575	0.808	C3165106	Infiltrating duct carcinoma of female breast	disease	C04;C17	Neoplastic Process	0.3				0	0	UNIPROT
54822	TRPM7	0.531	0.731	C3165106	Infiltrating duct carcinoma of female breast	disease	C04;C17	Neoplastic Process	0.3				0	1	UNIPROT
999	CDH1	0.401	0.808	C1134719	Invasive Ductal Breast Carcinoma	disease	C04;C17	Neoplastic Process	0.39	1	1995	2019	2	0	CTD_human
1364	CLDN4	0.514	0.692	C1134719	Invasive Ductal Breast Carcinoma	disease	C04;C17	Neoplastic Process	0.3	1	2009	2009	1	0	CTD_human
9368	SLC9A3R1	0.547	0.577	C1134719	Invasive Ductal Breast Carcinoma	disease	C04;C17	Neoplastic Process	0.3	1	2017	2017	1	0	CTD_human
10	NAT2	0.451	0.885	C0006142	Malignant neoplasm of breast	disease	C04;C17	Neoplastic Process	0.4	0.857	1996	2018	1	0	CTD_human
50	ACO2	0.619	0.654	C0006142	Malignant neoplasm of breast	disease	C04;C17	Neoplastic Process	0.3				0	0	UNIPROT
102	ADAM10	0.489	0.846	C0006142	Malignant neoplasm of breast	disease	C04;C17	Neoplastic Process	0.4	1	1997	2020	1	0	CTD_human
226	ALDOA	0.631	0.615	C0006142	Malignant neoplasm of breast	disease	C04;C17	Neoplastic Process	0.3	1	2010	2010	1	0	CTD_human
286	ANK1	0.54	0.885	C0006142	Malignant neoplasm of breast	disease	C04;C17	Neoplastic Process	0.3				0	0	UNIPROT
353	APRT	0.423	0.846	C0006142	Malignant neoplasm of breast	disease	C04;C17	Neoplastic Process	0.4	1	1988	2018	1	0	CTD_human
357	SHROOM2	0.729	0.385	C0006142	Malignant neoplasm of breast	disease	C04;C17	Neoplastic Process	0.3				0	1	UNIPROT
396	ARHGDIA	0.663	0.577	C0006142	Malignant neoplasm of breast	disease	C04;C17	Neoplastic Process	0.32	1	2010	2014	1	0	CTD_human
435	ASL	0.593	0.731	C0006142	Malignant neoplasm of breast	disease	C04;C17	Neoplastic Process	0.31	1	2015	2015	0	0	UNIPROT
633	BGN	0.484	0.808	C0006142	Malignant neoplasm of breast	disease	C04;C17	Neoplastic Process	0.32	1	2009	2019	0	0	UNIPROT
649	BMP1	0.554	0.769	C0006142	Malignant neoplasm of breast	disease	C04;C17	Neoplastic Process	0.31	1	2016	2016	0	0	UNIPROT
695	BTK	0.464	0.808	C0006142	Malignant neoplasm of breast	disease	C04;C17	Neoplastic Process	0.32	1	2013	2016	0	0	CGI
847	CAT	0.359	0.962	C0006142	Malignant neoplasm of breast	disease	C04;C17	Neoplastic Process	0.4	0.963	1997	2019	1	0	CTD_human
857	CAV1	0.388	0.885	C0006142	Malignant neoplasm of breast	disease	C04;C17	Neoplastic Process	0.8	0.977	1999	2019	4	1	CTD_human;UNIPROT
987	LRBA	0.608	0.692	C0006142	Malignant neoplasm of breast	disease	C04;C17	Neoplastic Process	0.3				0	0	UNIPROT
999	CDH1	0.401	0.808	C0006142	Malignant neoplasm of breast	disease	C04;C17	Neoplastic Process	0.8	1	1991	2019	4	5	CTD_human;GENOMICS_ENGLAND;UNIPROT
1003	CDH5	0.561	0.692	C0006142	Malignant neoplasm of breast	disease	C04;C17	Neoplastic Process	0.37	1	2000	2018	1	0	CTD_human
1072	CFL1	0.529	0.769	C0006142	Malignant neoplasm of breast	disease	C04;C17	Neoplastic Process	0.36	1	1998	2018	1	0	CTD_human
1073	CFL2	0.659	0.5	C0006142	Malignant neoplasm of breast	disease	C04;C17	Neoplastic Process	0.31	1	2013	2013	0	0	UNIPROT
1180	CLCN1	0.641	0.423	C0006142	Malignant neoplasm of breast	disease	C04;C17	Neoplastic Process	0.3				0	1	UNIPROT
1192	CLIC1	0.601	0.5	C0006142	Malignant neoplasm of breast	disease	C04;C17	Neoplastic Process	0.3	1	2010	2010	1	0	CTD_human
1312	COMT	0.4	0.923	C0006142	Malignant neoplasm of breast	disease	C04;C17	Neoplastic Process	0.4	0.825	1997	2019	3	0	CTD_human
1364	CLDN4	0.514	0.692	C0006142	Malignant neoplasm of breast	disease	C04;C17	Neoplastic Process	0.4	1	2009	2019	1	0	CTD_human
1499	CTNNB1	0.303	0.885	C0006142	Malignant neoplasm of breast	disease	C04;C17	Neoplastic Process	0.4	0.976	1995	2020	2	0	CTD_human
1654	DDX3X	0.537	0.769	C0006142	Malignant neoplasm of breast	disease	C04;C17	Neoplastic Process	0.38	1	2008	2018	0	0	UNIPROT
1719	DHFR	0.513	0.808	C0006142	Malignant neoplasm of breast	disease	C04;C17	Neoplastic Process	0.39	0.9	1985	2018	2	0	CTD_human
1806	DPYD	0.493	0.846	C0006142	Malignant neoplasm of breast	disease	C04;C17	Neoplastic Process	0.34	1	2004	2017	1	0	CTD_human
1938	EEF2	0.599	0.731	C0006142	Malignant neoplasm of breast	disease	C04;C17	Neoplastic Process	0.3	1	2010	2010	1	0	CTD_human
1956	EGFR	0.295	0.885	C0006142	Malignant neoplasm of breast	disease	C04;C17	Neoplastic Process	0.4	0.97	1987	2020	6	0	CTD_human
1974	EIF4A2	0.604	0.731	C0006142	Malignant neoplasm of breast	disease	C04;C17	Neoplastic Process	0.34	1	2011	2019	0	0	UNIPROT
1983	EIF5	0.716	0.308	C0006142	Malignant neoplasm of breast	disease	C04;C17	Neoplastic Process	0.3				0	0	UNIPROT
2023	ENO1	0.481	0.885	C0006142	Malignant neoplasm of breast	disease	C04;C17	Neoplastic Process	0.36	1	2009	2019	1	0	CTD_human
2050	EPHB4	0.524	0.692	C0006142	Malignant neoplasm of breast	disease	C04;C17	Neoplastic Process	0.4	1	2002	2019	1	0	CTD_human
2066	ERBB4	0.455	0.846	C0006142	Malignant neoplasm of breast	disease	C04;C17	Neoplastic Process	0.5	1	1995	2019	0	1	CGI
2146	EZH2	0.376	0.885	C0006142	Malignant neoplasm of breast	disease	C04;C17	Neoplastic Process	0.4	0.978	2003	2020	1	0	CTD_human
2152	F3	0.415	0.846	C0006142	Malignant neoplasm of breast	disease	C04;C17	Neoplastic Process	0.4	0.923	1993	2018	1	0	CTD_human
2167	FABP4	0.5	0.808	C0006142	Malignant neoplasm of breast	disease	C04;C17	Neoplastic Process	0.37	0.857	1998	2019	0	1	UNIPROT
2194	FASN	0.474	0.846	C0006142	Malignant neoplasm of breast	disease	C04;C17	Neoplastic Process	0.4	0.98	1997	2019	2	0	CTD_human
2202	EFEMP1	0.54	0.769	C0006142	Malignant neoplasm of breast	disease	C04;C17	Neoplastic Process	0.32	1	2009	2015	1	0	CTD_human
2260	FGFR1	0.362	0.885	C0006142	Malignant neoplasm of breast	disease	C04;C17	Neoplastic Process	0.6	0.976	1999	2020	2	0	CGI;CTD_human
2316	FLNA	0.419	0.846	C0006142	Malignant neoplasm of breast	disease	C04;C17	Neoplastic Process	0.38	1	1990	2018	1	0	CTD_human
2317	FLNB	0.458	0.923	C0006142	Malignant neoplasm of breast	disease	C04;C17	Neoplastic Process	0.34	1	2009	2018	0	1	UNIPROT
2335	FN1	0.365	0.962	C0006142	Malignant neoplasm of breast	disease	C04;C17	Neoplastic Process	0.6	1	1997	2020	1	1	CTD_human;UNIPROT
2697	GJA1	0.393	0.885	C0006142	Malignant neoplasm of breast	disease	C04;C17	Neoplastic Process	0.4	1	2000	2019	1	0	CTD_human
2771	GNAI2	0.636	0.577	C0006142	Malignant neoplasm of breast	disease	C04;C17	Neoplastic Process	0.3	1	2009	2009	1	0	CTD_human
2817	GPC1	0.587	0.731	C0006142	Malignant neoplasm of breast	disease	C04;C17	Neoplastic Process	0.33	1	2001	2018	0	0	UNIPROT
2821	GPI	0.491	0.769	C0006142	Malignant neoplasm of breast	disease	C04;C17	Neoplastic Process	0.38	1	2000	2017	1	0	CTD_human
2876	GPX1	0.458	0.923	C0006142	Malignant neoplasm of breast	disease	C04;C17	Neoplastic Process	0.4	0.833	1995	2019	1	0	CTD_human
2934	GSN	0.475	0.885	C0006142	Malignant neoplasm of breast	disease	C04;C17	Neoplastic Process	0.4	1	1996	2018	0	0	UNIPROT
2950	GSTP1	0.383	0.923	C0006142	Malignant neoplasm of breast	disease	C04;C17	Neoplastic Process	0.4	0.9	1997	2019	1	0	CTD_human
3190	HNRNPK	0.539	0.846	C0006142	Malignant neoplasm of breast	disease	C04;C17	Neoplastic Process	0.31	1	2001	2011	1	0	CTD_human
3191	HNRNPL	0.663	0.5	C0006142	Malignant neoplasm of breast	disease	C04;C17	Neoplastic Process	0.31	1	2011	2019	1	0	CTD_human
3240	HP	0.412	0.885	C0006142	Malignant neoplasm of breast	disease	C04;C17	Neoplastic Process	0.35	1	2004	2017	1	0	CTD_human
3304	HSPA1B	0.474	0.808	C0006142	Malignant neoplasm of breast	disease	C04;C17	Neoplastic Process	0.31	1	2005	2012	1	0	CTD_human
3320	HSP90AA1	0.411	0.923	C0006142	Malignant neoplasm of breast	disease	C04;C17	Neoplastic Process	0.4	1	1992	2020	1	0	CTD_human
3479	IGF1	0.318	0.885	C0006142	Malignant neoplasm of breast	disease	C04;C17	Neoplastic Process	0.6	0.955	1986	2020	2	0	CTD_human
3480	IGF1R	0.399	0.885	C0006142	Malignant neoplasm of breast	disease	C04;C17	Neoplastic Process	0.4	1	1992	2019	1	0	CTD_human
3490	IGFBP7	0.476	0.769	C0006142	Malignant neoplasm of breast	disease	C04;C17	Neoplastic Process	0.4	1	1998	2017	1	0	CTD_human
3692	EIF6	0.584	0.538	C0006142	Malignant neoplasm of breast	disease	C04;C17	Neoplastic Process	0.3	1	2014	2014	1	0	CTD_human
3714	JAG2	0.576	0.846	C0006142	Malignant neoplasm of breast	disease	C04;C17	Neoplastic Process	0.31	1	2010	2011	1	0	CTD_human
3845	KRAS	0.32	0.923	C0006142	Malignant neoplasm of breast	disease	C04;C17	Neoplastic Process	0.7	0.947	2005	2020	0	1	CGI;CTD_human
3852	KRT5	0.512	0.731	C0006142	Malignant neoplasm of breast	disease	C04;C17	Neoplastic Process	0.4	1	2003	2019	1	0	CTD_human
3856	KRT8	0.517	0.654	C0006142	Malignant neoplasm of breast	disease	C04;C17	Neoplastic Process	0.38	0.889	1998	2019	1	0	CTD_human
3861	KRT14	0.53	0.731	C0006142	Malignant neoplasm of breast	disease	C04;C17	Neoplastic Process	0.36	1	2005	2018	1	0	CTD_human
3875	KRT18	0.53	0.692	C0006142	Malignant neoplasm of breast	disease	C04;C17	Neoplastic Process	0.36	1	2005	2019	2	0	CTD_human
3908	LAMA2	0.553	0.692	C0006142	Malignant neoplasm of breast	disease	C04;C17	Neoplastic Process	0.3				0	0	UNIPROT
3945	LDHB	0.604	0.615	C0006142	Malignant neoplasm of breast	disease	C04;C17	Neoplastic Process	0.34	1	2012	2018	1	0	CTD_human
4007	PRICKLE3	1	0.077	C0006142	Malignant neoplasm of breast	disease	C04;C17	Neoplastic Process	0.3				0	0	UNIPROT
4017	LOXL2	0.527	0.731	C0006142	Malignant neoplasm of breast	disease	C04;C17	Neoplastic Process	0.4	1	2009	2019	2	0	CTD_human
4240	MFGE8	0.548	0.808	C0006142	Malignant neoplasm of breast	disease	C04;C17	Neoplastic Process	0.35	1	2005	2019	1	0	CTD_human
4253	MIA2	0.7	0.577	C0006142	Malignant neoplasm of breast	disease	C04;C17	Neoplastic Process	0.3				0	0	UNIPROT
4282	MIF	0.412	0.885	C0006142	Malignant neoplasm of breast	disease	C04;C17	Neoplastic Process	0.38	1	2002	2017	1	0	CTD_human
4548	MTR	0.482	0.808	C0006142	Malignant neoplasm of breast	disease	C04;C17	Neoplastic Process	0.4	0.857	2007	2017	1	0	CTD_human
4619	MYH1	0.805	0.5	C0006142	Malignant neoplasm of breast	disease	C04;C17	Neoplastic Process	0.3				0	0	UNIPROT
4627	MYH9	0.505	0.808	C0006142	Malignant neoplasm of breast	disease	C04;C17	Neoplastic Process	0.54	1	2008	2018	1	0	CTD_human;UNIPROT
4654	MYOD1	0.569	0.654	C0006142	Malignant neoplasm of breast	disease	C04;C17	Neoplastic Process	0.34	1	1988	2017	0	2	UNIPROT
4660	PPP1R12B	0.769	0.269	C0006142	Malignant neoplasm of breast	disease	C04;C17	Neoplastic Process	0.3	1	2017	2017	1	0	CTD_human
4763	NF1	0.44	0.885	C0006142	Malignant neoplasm of breast	disease	C04;C17	Neoplastic Process	0.39	1	2001	2019	0	0	UNIPROT
4851	NOTCH1	0.369	0.885	C0006142	Malignant neoplasm of breast	disease	C04;C17	Neoplastic Process	0.6	1	2004	2020	2	0	CGI;CTD_human
4853	NOTCH2	0.441	0.808	C0006142	Malignant neoplasm of breast	disease	C04;C17	Neoplastic Process	0.58	1	2004	2019	1	0	CGI;CTD_human
4854	NOTCH3	0.435	0.808	C0006142	Malignant neoplasm of breast	disease	C04;C17	Neoplastic Process	0.4	1	2007	2020	1	0	CTD_human
4904	YBX1	0.519	0.769	C0006142	Malignant neoplasm of breast	disease	C04;C17	Neoplastic Process	0.4	0.967	2002	2019	1	0	CTD_human
5154	PDGFA	0.533	0.731	C0006142	Malignant neoplasm of breast	disease	C04;C17	Neoplastic Process	0.31	1	2005	2015	1	0	CTD_human
5291	PIK3CB	0.322	0.885	C0006142	Malignant neoplasm of breast	disease	C04;C17	Neoplastic Process	0.4	0.99	2001	2020	0	0	CGI
5321	PLA2G4A	0.496	0.846	C0006142	Malignant neoplasm of breast	disease	C04;C17	Neoplastic Process	0.55	1	2010	2019	1	1	CTD_human;UNIPROT
5351	PLOD1	0.579	0.731	C0006142	Malignant neoplasm of breast	disease	C04;C17	Neoplastic Process	0.3				0	0	UNIPROT
5358	PLS3	0.656	0.5	C0006142	Malignant neoplasm of breast	disease	C04;C17	Neoplastic Process	0.34	1	2014	2019	0	0	UNIPROT
5464	PPA1	0.656	0.615	C0006142	Malignant neoplasm of breast	disease	C04;C17	Neoplastic Process	0.31	1	2015	2015	0	0	UNIPROT
5562	PRKAA1	0.453	0.846	C0006142	Malignant neoplasm of breast	disease	C04;C17	Neoplastic Process	0.4	1	2016	2020	0	1	UNIPROT
5631	PRPS1	0.584	0.731	C0006142	Malignant neoplasm of breast	disease	C04;C17	Neoplastic Process	0.31	1	2017	2017	0	0	UNIPROT
5789	PTPRD	0.584	0.731	C0006142	Malignant neoplasm of breast	disease	C04;C17	Neoplastic Process	0.31	1	2008	2015	1	0	CTD_human
5819	NECTIN2	0.575	0.769	C0006142	Malignant neoplasm of breast	disease	C04;C17	Neoplastic Process	0.3	1	2013	2013	1	0	CTD_human
5880	RAC2	0.556	0.731	C0006142	Malignant neoplasm of breast	disease	C04;C17	Neoplastic Process	0.31	1	2018	2018	0	0	UNIPROT
5935	RBM3	0.595	0.654	C0006142	Malignant neoplasm of breast	disease	C04;C17	Neoplastic Process	0.36	1	2006	2019	1	0	CTD_human
6147	RPL23A	0.78	0.308	C0006142	Malignant neoplasm of breast	disease	C04;C17	Neoplastic Process	0.3	1	2011	2011	1	0	CTD_human
6160	RPL31	0.78	0.308	C0006142	Malignant neoplasm of breast	disease	C04;C17	Neoplastic Process	0.3	1	2011	2011	1	0	CTD_human
6181	RPLP2	0.805	0.192	C0006142	Malignant neoplasm of breast	disease	C04;C17	Neoplastic Process	0.3	1	2018	2018	1	0	CTD_human
6191	RPS4X	0.711	0.5	C0006142	Malignant neoplasm of breast	disease	C04;C17	Neoplastic Process	0.32	1	2011	2017	1	0	CTD_human
6194	RPS6	0.547	0.692	C0006142	Malignant neoplasm of breast	disease	C04;C17	Neoplastic Process	0.34	1	2008	2019	1	0	CTD_human
6197	RPS6KA3	0.491	0.846	C0006142	Malignant neoplasm of breast	disease	C04;C17	Neoplastic Process	0.38	1	2012	2019	0	1	UNIPROT
6201	RPS7	0.682	0.462	C0006142	Malignant neoplasm of breast	disease	C04;C17	Neoplastic Process	0.3	1	2011	2011	1	0	CTD_human
6202	RPS8	0.805	0.192	C0006142	Malignant neoplasm of breast	disease	C04;C17	Neoplastic Process	0.3	1	2011	2011	1	0	CTD_human
6203	RPS9	0.78	0.154	C0006142	Malignant neoplasm of breast	disease	C04;C17	Neoplastic Process	0.31	1	2008	2008	0	0	UNIPROT
6249	CLIP1	0.617	0.654	C0006142	Malignant neoplasm of breast	disease	C04;C17	Neoplastic Process	0.33	1	2014	2015	0	1	UNIPROT
6387	CXCL12	0.379	0.846	C0006142	Malignant neoplasm of breast	disease	C04;C17	Neoplastic Process	0.4	0.988	2003	2020	1	0	CTD_human
6426	SRSF1	0.563	0.692	C0006142	Malignant neoplasm of breast	disease	C04;C17	Neoplastic Process	0.32	1	2013	2015	0	0	UNIPROT
6470	SHMT1	0.566	0.654	C0006142	Malignant neoplasm of breast	disease	C04;C17	Neoplastic Process	0.34	0.8	2007	2015	1	0	CTD_human
6513	SLC2A1	0.388	0.808	C0006142	Malignant neoplasm of breast	disease	C04;C17	Neoplastic Process	0.4	0.97	2004	2019	1	0	CTD_human
6653	SORL1	0.582	0.692	C0006142	Malignant neoplasm of breast	disease	C04;C17	Neoplastic Process	0.3				0	0	UNIPROT
6696	SPP1	0.353	0.885	C0006142	Malignant neoplasm of breast	disease	C04;C17	Neoplastic Process	0.4	0.986	1997	2019	2	0	CTD_human
6714	SRC	0.467	0.885	C0006142	Malignant neoplasm of breast	disease	C04;C17	Neoplastic Process	0.4	1	1997	2019	1	0	CTD_human
6772	STAT1	0.399	0.885	C0006142	Malignant neoplasm of breast	disease	C04;C17	Neoplastic Process	0.6	1	2000	2019	0	0	UNIPROT
6774	STAT3	0.32	0.923	C0006142	Malignant neoplasm of breast	disease	C04;C17	Neoplastic Process	0.4	0.99	1997	2020	1	0	CTD_human
6817	SULT1A1	0.554	0.769	C0006142	Malignant neoplasm of breast	disease	C04;C17	Neoplastic Process	0.4	0.806	2000	2018	1	0	CTD_human
6950	TCP1	0.619	0.654	C0006142	Malignant neoplasm of breast	disease	C04;C17	Neoplastic Process	0.32	1	2015	2016	0	1	UNIPROT
7007	TECTA	0.7	0.385	C0006142	Malignant neoplasm of breast	disease	C04;C17	Neoplastic Process	0.3				0	1	UNIPROT
7037	TFRC	0.437	0.885	C0006142	Malignant neoplasm of breast	disease	C04;C17	Neoplastic Process	0.4	1	1999	2019	2	0	CTD_human
7052	TGM2	0.445	0.808	C0006142	Malignant neoplasm of breast	disease	C04;C17	Neoplastic Process	0.4	1	2001	2018	1	0	CTD_human
7057	THBS1	0.407	0.885	C0006142	Malignant neoplasm of breast	disease	C04;C17	Neoplastic Process	0.4	0.955	1994	2019	1	0	CTD_human
7059	THBS3	0.792	0.269	C0006142	Malignant neoplasm of breast	disease	C04;C17	Neoplastic Process	0.3				0	0	UNIPROT
7106	TSPAN4	0.743	0.269	C0006142	Malignant neoplasm of breast	disease	C04;C17	Neoplastic Process	0.3				0	0	UNIPROT
7153	TOP2A	0.497	0.731	C0006142	Malignant neoplasm of breast	disease	C04;C17	Neoplastic Process	0.4	0.974	1999	2019	4	0	CTD_human
7157	TP53	0.236	0.962	C0006142	Malignant neoplasm of breast	disease	C04;C17	Neoplastic Process	1	0.973	1982	2020	6	9	CGI;CTD_human;GENOMICS_ENGLAND;UNIPROT
7295	TXN	0.447	0.885	C0006142	Malignant neoplasm of breast	disease	C04;C17	Neoplastic Process	0.38	1	2000	2018	1	0	CTD_human
7372	UMPS	0.584	0.615	C0006142	Malignant neoplasm of breast	disease	C04;C17	Neoplastic Process	0.31	1	2008	2014	2	0	CTD_human
7424	VEGFC	0.459	0.769	C0006142	Malignant neoplasm of breast	disease	C04;C17	Neoplastic Process	0.4	0.946	2000	2019	2	0	CTD_human
7450	VWF	0.408	0.885	C0006142	Malignant neoplasm of breast	disease	C04;C17	Neoplastic Process	0.31	1	2019	2019	0	0	UNIPROT
7453	WARS1	0.65	0.654	C0006142	Malignant neoplasm of breast	disease	C04;C17	Neoplastic Process	0.31	1	2015	2015	0	0	UNIPROT
7913	DEK	0.542	0.769	C0006142	Malignant neoplasm of breast	disease	C04;C17	Neoplastic Process	0.34	1	2011	2019	1	0	CTD_human
8065	CUL5	0.691	0.577	C0006142	Malignant neoplasm of breast	disease	C04;C17	Neoplastic Process	0.33	1	2003	2019	1	0	CTD_human
8085	KMT2D	0.465	0.808	C0006142	Malignant neoplasm of breast	disease	C04;C17	Neoplastic Process	0.34	1	2010	2019	1	0	CTD_human
8359	H4C1	0.541	0.692	C0006142	Malignant neoplasm of breast	disease	C04;C17	Neoplastic Process	0.32	1	2018	2019	0	0	UNIPROT
8894	EIF2S2	0.621	0.577	C0006142	Malignant neoplasm of breast	disease	C04;C17	Neoplastic Process	0.32	1	2008	2019	1	0	CTD_human
8899	PRPF4B	0.76	0.269	C0006142	Malignant neoplasm of breast	disease	C04;C17	Neoplastic Process	0.31	1	2018	2018	0	1	UNIPROT
8907	AP1M1	0.839	0.154	C0006142	Malignant neoplasm of breast	disease	C04;C17	Neoplastic Process	0.3				0	1	UNIPROT
8997	KALRN	0.644	0.654	C0006142	Malignant neoplasm of breast	disease	C04;C17	Neoplastic Process	0.3				0	0	UNIPROT
9076	CLDN1	0.481	0.808	C0006142	Malignant neoplasm of breast	disease	C04;C17	Neoplastic Process	0.4	0.9	1999	2019	2	0	CTD_human
9175	MAP3K13	0.743	0.192	C0006142	Malignant neoplasm of breast	disease	C04;C17	Neoplastic Process	0.32	1	2016	2017	0	0	CGI
9260	PDLIM7	0.474	0.808	C0006142	Malignant neoplasm of breast	disease	C04;C17	Neoplastic Process	0.34	1	2002	2018	0	0	UNIPROT
9839	ZEB2	0.471	0.808	C0006142	Malignant neoplasm of breast	disease	C04;C17	Neoplastic Process	0.4	1	2006	2019	1	0	CTD_human
10016	PDCD6	0.653	0.5	C0006142	Malignant neoplasm of breast	disease	C04;C17	Neoplastic Process	0.32	1	2017	2018	0	0	UNIPROT
10142	AKAP9	0.638	0.385	C0006142	Malignant neoplasm of breast	disease	C04;C17	Neoplastic Process	0.33	1	2008	2017	0	1	UNIPROT
10160	FARP1	0.769	0.231	C0006142	Malignant neoplasm of breast	disease	C04;C17	Neoplastic Process	0.3				0	1	UNIPROT
10178	TENM1	0.653	0.692	C0006142	Malignant neoplasm of breast	disease	C04;C17	Neoplastic Process	0.33	1	2012	2018	0	1	UNIPROT
10371	SEMA3A	0.5	0.808	C0006142	Malignant neoplasm of breast	disease	C04;C17	Neoplastic Process	0.32	1	2018	2019	0	1	UNIPROT
10381	TUBB3	0.486	0.808	C0006142	Malignant neoplasm of breast	disease	C04;C17	Neoplastic Process	0.39	1	2011	2019	1	0	CTD_human
10397	NDRG1	0.488	0.731	C0006142	Malignant neoplasm of breast	disease	C04;C17	Neoplastic Process	0.4	1	2004	2019	1	0	CTD_human
10468	FST	0.513	0.731	C0006142	Malignant neoplasm of breast	disease	C04;C17	Neoplastic Process	0.37	1	2005	2018	1	0	CTD_human
10480	EIF3M	0.78	0.269	C0006142	Malignant neoplasm of breast	disease	C04;C17	Neoplastic Process	0.3				0	0	UNIPROT
10564	ARFGEF2	0.659	0.462	C0006142	Malignant neoplasm of breast	disease	C04;C17	Neoplastic Process	0.33	1	2018	2019	0	0	UNIPROT
10580	SORBS1	0.554	0.769	C0006142	Malignant neoplasm of breast	disease	C04;C17	Neoplastic Process	0.4	1	2009	2020	0	0	UNIPROT
11009	IL24	0.498	0.769	C0006142	Malignant neoplasm of breast	disease	C04;C17	Neoplastic Process	0.4	1	2005	2018	2	0	CTD_human
11041	B4GAT1	0.59	0.538	C0006142	Malignant neoplasm of breast	disease	C04;C17	Neoplastic Process	0.3	1	2018	2018	1	0	CTD_human
11227	GALNT5	0.78	0.192	C0006142	Malignant neoplasm of breast	disease	C04;C17	Neoplastic Process	0.3				0	0	UNIPROT
22795	NID2	0.674	0.5	C0006142	Malignant neoplasm of breast	disease	C04;C17	Neoplastic Process	0.3				0	1	UNIPROT
22948	CCT5	0.663	0.462	C0006142	Malignant neoplasm of breast	disease	C04;C17	Neoplastic Process	0.3	1	2008	2008	1	0	CTD_human
23301	EHBP1	0.839	0.231	C0006142	Malignant neoplasm of breast	disease	C04;C17	Neoplastic Process	0.3				0	0	UNIPROT
23345	SYNE1	0.511	0.846	C0006142	Malignant neoplasm of breast	disease	C04;C17	Neoplastic Process	0.3	1	2008	2008	1	0	CTD_human
23352	UBR4	0.76	0.269	C0006142	Malignant neoplasm of breast	disease	C04;C17	Neoplastic Process	0.3				0	1	UNIPROT
23411	SIRT1	0.378	0.885	C0006142	Malignant neoplasm of breast	disease	C04;C17	Neoplastic Process	0.4	0.979	2008	2020	1	0	CTD_human
23673	STX12	0.839	0.115	C0006142	Malignant neoplasm of breast	disease	C04;C17	Neoplastic Process	0.3				0	0	UNIPROT
23705	CADM1	0.491	0.769	C0006142	Malignant neoplasm of breast	disease	C04;C17	Neoplastic Process	0.38	0.75	2002	2019	1	0	CTD_human
24149	ZNF318	0.792	0.269	C0006142	Malignant neoplasm of breast	disease	C04;C17	Neoplastic Process	0.3				0	1	UNIPROT
25824	PRDX5	0.522	0.808	C0006142	Malignant neoplasm of breast	disease	C04;C17	Neoplastic Process	0.34	1	2012	2017	0	0	UNIPROT
25836	NIPBL	0.521	0.808	C0006142	Malignant neoplasm of breast	disease	C04;C17	Neoplastic Process	0.31	1	2017	2017	0	0	UNIPROT
26227	PHGDH	0.484	0.885	C0006142	Malignant neoplasm of breast	disease	C04;C17	Neoplastic Process	0.4	0.909	2011	2019	1	0	CTD_human
26504	CNNM4	0.695	0.346	C0006142	Malignant neoplasm of breast	disease	C04;C17	Neoplastic Process	0.3				0	0	UNIPROT
26986	PABPC1	0.621	0.654	C0006142	Malignant neoplasm of breast	disease	C04;C17	Neoplastic Process	0.3	1	2011	2011	1	0	CTD_human
27333	GOLIM4	0.839	0.231	C0006142	Malignant neoplasm of breast	disease	C04;C17	Neoplastic Process	0.3				0	0	UNIPROT
29789	OLA1	0.78	0.269	C0006142	Malignant neoplasm of breast	disease	C04;C17	Neoplastic Process	0.42	0.667	2009	2014	0	1	UNIPROT
50485	SMARCAL1	0.599	0.654	C0006142	Malignant neoplasm of breast	disease	C04;C17	Neoplastic Process	0.3				0	0	UNIPROT
51129	ANGPTL4	0.498	0.731	C0006142	Malignant neoplasm of breast	disease	C04;C17	Neoplastic Process	0.33	1	2011	2019	1	0	CTD_human
51350	KRT76	1	0.077	C0006142	Malignant neoplasm of breast	disease	C04;C17	Neoplastic Process	0.3				0	0	UNIPROT
51361	HOOK1	0.716	0.462	C0006142	Malignant neoplasm of breast	disease	C04;C17	Neoplastic Process	0.3				0	0	UNIPROT
55183	RIF1	0.7	0.462	C0006142	Malignant neoplasm of breast	disease	C04;C17	Neoplastic Process	0.3				0	0	UNIPROT
55818	KDM3A	0.599	0.654	C0006142	Malignant neoplasm of breast	disease	C04;C17	Neoplastic Process	0.36	0.833	2015	2019	0	0	UNIPROT
79659	DYNC2H1	0.555	0.731	C0006142	Malignant neoplasm of breast	disease	C04;C17	Neoplastic Process	0.3	1	2014	2014	1	0	CTD_human
79813	EHMT1	0.46	0.808	C0006142	Malignant neoplasm of breast	disease	C04;C17	Neoplastic Process	0.32	1	2012	2017	0	1	UNIPROT
80018	NAA25	0.603	0.692	C0006142	Malignant neoplasm of breast	disease	C04;C17	Neoplastic Process	0.33	0.667	1993	2017	0	0	UNIPROT
84033	OBSCN	0.736	0.538	C0006142	Malignant neoplasm of breast	disease	C04;C17	Neoplastic Process	0.3				0	1	UNIPROT
84376	HOOK3	0.78	0.308	C0006142	Malignant neoplasm of breast	disease	C04;C17	Neoplastic Process	0.3				0	0	UNIPROT
133522	PPARGC1B	0.569	0.731	C0006142	Malignant neoplasm of breast	disease	C04;C17	Neoplastic Process	0.39	1	2003	2019	1	0	CTD_human
135228	CD109	0.595	0.654	C0006142	Malignant neoplasm of breast	disease	C04;C17	Neoplastic Process	0.3	1	2008	2008	1	0	CTD_human
150483	TEKT4	0.839	0.192	C0006142	Malignant neoplasm of breast	disease	C04;C17	Neoplastic Process	0.31	1	2014	2014	0	0	UNIPROT
283310	OTOGL	0.805	0.269	C0006142	Malignant neoplasm of breast	disease	C04;C17	Neoplastic Process	0.3				0	0	UNIPROT
284119	CAVIN1	0.559	0.654	C0006142	Malignant neoplasm of breast	disease	C04;C17	Neoplastic Process	0.3				0	0	UNIPROT
404037	HAPLN4	0.805	0.154	C0006142	Malignant neoplasm of breast	disease	C04;C17	Neoplastic Process	0.3	1	2018	2018	1	0	CTD_human
695	BTK	0.464	0.808	C0496956	Neoplasm of uncertain or unknown behavior of breast	disease	C04;C17	Neoplastic Process	0.3				0	0	CGI
2066	ERBB4	0.455	0.846	C0496956	Neoplasm of uncertain or unknown behavior of breast	disease	C04;C17	Neoplastic Process	0.3				0	0	CGI
2260	FGFR1	0.362	0.885	C0496956	Neoplasm of uncertain or unknown behavior of breast	disease	C04;C17	Neoplastic Process	0.3				0	0	CGI
3845	KRAS	0.32	0.923	C0496956	Neoplasm of uncertain or unknown behavior of breast	disease	C04;C17	Neoplastic Process	0.3				0	0	CGI
4851	NOTCH1	0.369	0.885	C0496956	Neoplasm of uncertain or unknown behavior of breast	disease	C04;C17	Neoplastic Process	0.3				0	0	CGI
4853	NOTCH2	0.441	0.808	C0496956	Neoplasm of uncertain or unknown behavior of breast	disease	C04;C17	Neoplastic Process	0.3				0	0	CGI
5291	PIK3CB	0.322	0.885	C0496956	Neoplasm of uncertain or unknown behavior of breast	disease	C04;C17	Neoplastic Process	0.3				0	0	CGI
7157	TP53	0.236	0.962	C0496956	Neoplasm of uncertain or unknown behavior of breast	disease	C04;C17	Neoplastic Process	0.3				0	0	CGI
9175	MAP3K13	0.743	0.192	C0496956	Neoplasm of uncertain or unknown behavior of breast	disease	C04;C17	Neoplastic Process	0.3				0	0	CGI
3845	KRAS	0.32	0.923	C3539878	Triple Negative Breast Neoplasms	disease	C04;C17	Neoplastic Process	0.36	1	2010	2019	1	0	CTD_human
60	ACTB	0.325	0.923	C1257925	Mammary Carcinoma, Animal	disease	C04;C22	Neoplastic Process	0.3	1	2005	2005	1	0	CTD_human
81	ACTN4	0.508	0.808	C1257925	Mammary Carcinoma, Animal	disease	C04;C22	Neoplastic Process	0.3	1	2002	2002	1	0	CTD_human
214	ALCAM	0.502	0.808	C1257925	Mammary Carcinoma, Animal	disease	C04;C22	Neoplastic Process	0.3	1	2005	2005	1	0	CTD_human
301	ANXA1	0.442	0.885	C1257925	Mammary Carcinoma, Animal	disease	C04;C22	Neoplastic Process	0.3	1	2002	2012	3	0	CTD_human
302	ANXA2	0.453	0.808	C1257925	Mammary Carcinoma, Animal	disease	C04;C22	Neoplastic Process	0.3	1	2012	2012	1	0	CTD_human
307	ANXA4	0.599	0.692	C1257925	Mammary Carcinoma, Animal	disease	C04;C22	Neoplastic Process	0.3	1	2005	2005	1	0	CTD_human
358	AQP1	0.467	0.885	C1257925	Mammary Carcinoma, Animal	disease	C04;C22	Neoplastic Process	0.3	1	2002	2002	1	0	CTD_human
832	CAPZB	0.729	0.308	C1257925	Mammary Carcinoma, Animal	disease	C04;C22	Neoplastic Process	0.3	1	2005	2005	1	0	CTD_human
949	SCARB1	0.559	0.731	C1257925	Mammary Carcinoma, Animal	disease	C04;C22	Neoplastic Process	0.3	1	2002	2002	1	0	CTD_human
998	CDC42	0.458	0.846	C1257925	Mammary Carcinoma, Animal	disease	C04;C22	Neoplastic Process	0.3	1	2005	2005	1	0	CTD_human
999	CDH1	0.401	0.808	C1257925	Mammary Carcinoma, Animal	disease	C04;C22	Neoplastic Process	0.3	1	2005	2005	1	0	CTD_human
1312	COMT	0.4	0.923	C1257925	Mammary Carcinoma, Animal	disease	C04;C22	Neoplastic Process	0.3	1	2008	2008	1	0	CTD_human
1915	EEF1A1	0.584	0.654	C1257925	Mammary Carcinoma, Animal	disease	C04;C22	Neoplastic Process	0.3	1	2002	2002	1	0	CTD_human
1956	EGFR	0.295	0.885	C1257925	Mammary Carcinoma, Animal	disease	C04;C22	Neoplastic Process	0.3	1	1995	1995	1	0	CTD_human
1984	EIF5A	0.612	0.692	C1257925	Mammary Carcinoma, Animal	disease	C04;C22	Neoplastic Process	0.3	1	2005	2005	1	0	CTD_human
2023	ENO1	0.481	0.885	C1257925	Mammary Carcinoma, Animal	disease	C04;C22	Neoplastic Process	0.3	1	2002	2002	1	0	CTD_human
2167	FABP4	0.5	0.808	C1257925	Mammary Carcinoma, Animal	disease	C04;C22	Neoplastic Process	0.3	1	2005	2005	1	0	CTD_human
2180	ACSL1	0.617	0.577	C1257925	Mammary Carcinoma, Animal	disease	C04;C22	Neoplastic Process	0.3	1	2005	2005	1	0	CTD_human
2202	EFEMP1	0.54	0.769	C1257925	Mammary Carcinoma, Animal	disease	C04;C22	Neoplastic Process	0.3	1	2002	2002	1	0	CTD_human
2335	FN1	0.365	0.962	C1257925	Mammary Carcinoma, Animal	disease	C04;C22	Neoplastic Process	0.3	1	2002	2002	1	0	CTD_human
2771	GNAI2	0.636	0.577	C1257925	Mammary Carcinoma, Animal	disease	C04;C22	Neoplastic Process	0.3	1	2005	2005	1	0	CTD_human
3178	HNRNPA1	0.529	0.885	C1257925	Mammary Carcinoma, Animal	disease	C04;C22	Neoplastic Process	0.3	1	2005	2005	1	0	CTD_human
3827	KNG1	0.481	0.885	C1257925	Mammary Carcinoma, Animal	disease	C04;C22	Neoplastic Process	0.3	1	2012	2012	1	0	CTD_human
3852	KRT5	0.512	0.731	C1257925	Mammary Carcinoma, Animal	disease	C04;C22	Neoplastic Process	0.3	1	2002	2002	1	0	CTD_human
4023	LPL	0.474	0.808	C1257925	Mammary Carcinoma, Animal	disease	C04;C22	Neoplastic Process	0.3	1	2002	2002	1	0	CTD_human
4072	EPCAM	0.451	0.885	C1257925	Mammary Carcinoma, Animal	disease	C04;C22	Neoplastic Process	0.3	1	2005	2005	1	0	CTD_human
4191	MDH2	0.595	0.731	C1257925	Mammary Carcinoma, Animal	disease	C04;C22	Neoplastic Process	0.3	1	2002	2002	1	0	CTD_human
4282	MIF	0.412	0.885	C1257925	Mammary Carcinoma, Animal	disease	C04;C22	Neoplastic Process	0.3	1	2002	2002	1	0	CTD_human
5037	PEBP1	0.5	0.808	C1257925	Mammary Carcinoma, Animal	disease	C04;C22	Neoplastic Process	0.3	1	2002	2002	1	0	CTD_human
5154	PDGFA	0.533	0.731	C1257925	Mammary Carcinoma, Animal	disease	C04;C22	Neoplastic Process	0.3	1	2002	2005	2	0	CTD_human
5223	PGAM1	0.621	0.615	C1257925	Mammary Carcinoma, Animal	disease	C04;C22	Neoplastic Process	0.3	1	2005	2005	1	0	CTD_human
5315	PKM	0.482	0.808	C1257925	Mammary Carcinoma, Animal	disease	C04;C22	Neoplastic Process	0.3	1	2005	2005	1	0	CTD_human
5685	PSMA4	0.716	0.385	C1257925	Mammary Carcinoma, Animal	disease	C04;C22	Neoplastic Process	0.3	1	2005	2005	1	0	CTD_human
5720	PSME1	0.736	0.462	C1257925	Mammary Carcinoma, Animal	disease	C04;C22	Neoplastic Process	0.3	1	2005	2005	1	0	CTD_human
5725	PTBP1	0.517	0.769	C1257925	Mammary Carcinoma, Animal	disease	C04;C22	Neoplastic Process	0.3	1	2002	2002	1	0	CTD_human
5901	RAN	0.576	0.808	C1257925	Mammary Carcinoma, Animal	disease	C04;C22	Neoplastic Process	0.3	1	2002	2005	2	0	CTD_human
5947	RBP1	0.565	0.731	C1257925	Mammary Carcinoma, Animal	disease	C04;C22	Neoplastic Process	0.3	1	2002	2002	1	0	CTD_human
6122	RPL3	0.736	0.462	C1257925	Mammary Carcinoma, Animal	disease	C04;C22	Neoplastic Process	0.3	1	2005	2005	1	0	CTD_human
6128	RPL6	0.7	0.385	C1257925	Mammary Carcinoma, Animal	disease	C04;C22	Neoplastic Process	0.3	1	2002	2002	1	0	CTD_human
6208	RPS14	0.631	0.5	C1257925	Mammary Carcinoma, Animal	disease	C04;C22	Neoplastic Process	0.3	1	2005	2005	1	0	CTD_human
6277	S100A6	0.51	0.808	C1257925	Mammary Carcinoma, Animal	disease	C04;C22	Neoplastic Process	0.3	1	2005	2005	1	0	CTD_human
6558	SLC12A2	0.552	0.808	C1257925	Mammary Carcinoma, Animal	disease	C04;C22	Neoplastic Process	0.3	1	2002	2002	1	0	CTD_human
6634	SNRPD3	0.78	0.192	C1257925	Mammary Carcinoma, Animal	disease	C04;C22	Neoplastic Process	0.3	1	2005	2005	1	0	CTD_human
6774	STAT3	0.32	0.923	C1257925	Mammary Carcinoma, Animal	disease	C04;C22	Neoplastic Process	0.3	1	2005	2005	1	0	CTD_human
7001	PRDX2	0.474	0.885	C1257925	Mammary Carcinoma, Animal	disease	C04;C22	Neoplastic Process	0.3	1	2005	2005	1	0	CTD_human
7018	TF	0.527	0.846	C1257925	Mammary Carcinoma, Animal	disease	C04;C22	Neoplastic Process	0.3	1	1998	2005	2	0	CTD_human
7086	TKT	0.595	0.769	C1257925	Mammary Carcinoma, Animal	disease	C04;C22	Neoplastic Process	0.3	1	2002	2002	1	0	CTD_human
7227	TRPS1	0.537	0.769	C1257925	Mammary Carcinoma, Animal	disease	C04;C22	Neoplastic Process	0.3	1	2005	2005	1	0	CTD_human
7430	EZR	0.476	0.808	C1257925	Mammary Carcinoma, Animal	disease	C04;C22	Neoplastic Process	0.3	1	2002	2002	1	0	CTD_human
7534	YWHAZ	0.475	0.846	C1257925	Mammary Carcinoma, Animal	disease	C04;C22	Neoplastic Process	0.3	1	2002	2002	1	0	CTD_human
8673	VAMP8	0.61	0.731	C1257925	Mammary Carcinoma, Animal	disease	C04;C22	Neoplastic Process	0.3	1	2005	2005	1	0	CTD_human
9902	MRC2	0.705	0.385	C1257925	Mammary Carcinoma, Animal	disease	C04;C22	Neoplastic Process	0.3	1	2005	2005	1	0	CTD_human
10409	BASP1	0.666	0.5	C1257925	Mammary Carcinoma, Animal	disease	C04;C22	Neoplastic Process	0.3	1	2002	2002	1	0	CTD_human
10653	SPINT2	0.556	0.808	C1257925	Mammary Carcinoma, Animal	disease	C04;C22	Neoplastic Process	0.3	1	2005	2005	1	0	CTD_human
10769	PLK2	0.575	0.808	C1257925	Mammary Carcinoma, Animal	disease	C04;C22	Neoplastic Process	0.3	1	2002	2002	1	0	CTD_human
11151	CORO1A	0.564	0.692	C1257925	Mammary Carcinoma, Animal	disease	C04;C22	Neoplastic Process	0.3	1	2011	2011	1	0	CTD_human
23569	PADI4	0.494	0.808	C1257925	Mammary Carcinoma, Animal	disease	C04;C22	Neoplastic Process	0.3	1	2002	2002	1	0	CTD_human
51599	LSR	0.666	0.538	C1257925	Mammary Carcinoma, Animal	disease	C04;C22	Neoplastic Process	0.3	1	2002	2005	2	0	CTD_human
10	NAT2	0.451	0.885	C4704874	Mammary Carcinoma, Human	disease	C04;C17	Neoplastic Process	0.3	1	2009	2009	1	0	CTD_human
102	ADAM10	0.489	0.846	C4704874	Mammary Carcinoma, Human	disease	C04;C17	Neoplastic Process	0.3	1	2006	2006	1	0	CTD_human
226	ALDOA	0.631	0.615	C4704874	Mammary Carcinoma, Human	disease	C04;C17	Neoplastic Process	0.3	1	2010	2010	1	0	CTD_human
353	APRT	0.423	0.846	C4704874	Mammary Carcinoma, Human	disease	C04;C17	Neoplastic Process	0.3	1	2008	2008	1	0	CTD_human
396	ARHGDIA	0.663	0.577	C4704874	Mammary Carcinoma, Human	disease	C04;C17	Neoplastic Process	0.3	1	2010	2010	1	0	CTD_human
847	CAT	0.359	0.962	C4704874	Mammary Carcinoma, Human	disease	C04;C17	Neoplastic Process	0.3	1	2014	2014	1	0	CTD_human
857	CAV1	0.388	0.885	C4704874	Mammary Carcinoma, Human	disease	C04;C17	Neoplastic Process	0.3	1	2009	2011	4	0	CTD_human
999	CDH1	0.401	0.808	C4704874	Mammary Carcinoma, Human	disease	C04;C17	Neoplastic Process	0.3	1	2007	2013	4	0	CTD_human
1003	CDH5	0.561	0.692	C4704874	Mammary Carcinoma, Human	disease	C04;C17	Neoplastic Process	0.3	1	2008	2008	1	0	CTD_human
1072	CFL1	0.529	0.769	C4704874	Mammary Carcinoma, Human	disease	C04;C17	Neoplastic Process	0.3	1	2010	2010	1	0	CTD_human
1192	CLIC1	0.601	0.5	C4704874	Mammary Carcinoma, Human	disease	C04;C17	Neoplastic Process	0.3	1	2010	2010	1	0	CTD_human
1312	COMT	0.4	0.923	C4704874	Mammary Carcinoma, Human	disease	C04;C17	Neoplastic Process	0.3	1	1997	2005	3	0	CTD_human
1364	CLDN4	0.514	0.692	C4704874	Mammary Carcinoma, Human	disease	C04;C17	Neoplastic Process	0.3	1	2009	2009	1	0	CTD_human
1499	CTNNB1	0.303	0.885	C4704874	Mammary Carcinoma, Human	disease	C04;C17	Neoplastic Process	0.3	1	2002	2014	2	0	CTD_human
1719	DHFR	0.513	0.808	C4704874	Mammary Carcinoma, Human	disease	C04;C17	Neoplastic Process	0.3	1	2011	2017	2	0	CTD_human
1806	DPYD	0.493	0.846	C4704874	Mammary Carcinoma, Human	disease	C04;C17	Neoplastic Process	0.3	1	2008	2008	1	0	CTD_human
1938	EEF2	0.599	0.731	C4704874	Mammary Carcinoma, Human	disease	C04;C17	Neoplastic Process	0.3	1	2010	2010	1	0	CTD_human
1956	EGFR	0.295	0.885	C4704874	Mammary Carcinoma, Human	disease	C04;C17	Neoplastic Process	0.31	1	2001	2013	6	0	CTD_human
2023	ENO1	0.481	0.885	C4704874	Mammary Carcinoma, Human	disease	C04;C17	Neoplastic Process	0.3	1	2010	2010	1	0	CTD_human
2050	EPHB4	0.524	0.692	C4704874	Mammary Carcinoma, Human	disease	C04;C17	Neoplastic Process	0.3	1	2013	2013	1	0	CTD_human
2146	EZH2	0.376	0.885	C4704874	Mammary Carcinoma, Human	disease	C04;C17	Neoplastic Process	0.3	1	2011	2011	1	0	CTD_human
2152	F3	0.415	0.846	C4704874	Mammary Carcinoma, Human	disease	C04;C17	Neoplastic Process	0.3	1	2005	2005	1	0	CTD_human
2194	FASN	0.474	0.846	C4704874	Mammary Carcinoma, Human	disease	C04;C17	Neoplastic Process	0.3	1	2006	2008	2	0	CTD_human
2202	EFEMP1	0.54	0.769	C4704874	Mammary Carcinoma, Human	disease	C04;C17	Neoplastic Process	0.3	1	2009	2009	1	0	CTD_human
2260	FGFR1	0.362	0.885	C4704874	Mammary Carcinoma, Human	disease	C04;C17	Neoplastic Process	0.3	1	2010	2011	2	0	CTD_human
2316	FLNA	0.419	0.846	C4704874	Mammary Carcinoma, Human	disease	C04;C17	Neoplastic Process	0.3	1	2015	2015	1	0	CTD_human
2335	FN1	0.365	0.962	C4704874	Mammary Carcinoma, Human	disease	C04;C17	Neoplastic Process	0.3	1	2013	2013	1	0	CTD_human
2697	GJA1	0.393	0.885	C4704874	Mammary Carcinoma, Human	disease	C04;C17	Neoplastic Process	0.3	1	2018	2018	1	0	CTD_human
2771	GNAI2	0.636	0.577	C4704874	Mammary Carcinoma, Human	disease	C04;C17	Neoplastic Process	0.3	1	2009	2009	1	0	CTD_human
2821	GPI	0.491	0.769	C4704874	Mammary Carcinoma, Human	disease	C04;C17	Neoplastic Process	0.3	1	2008	2008	1	0	CTD_human
2876	GPX1	0.458	0.923	C4704874	Mammary Carcinoma, Human	disease	C04;C17	Neoplastic Process	0.3	1	2003	2003	1	0	CTD_human
2950	GSTP1	0.383	0.923	C4704874	Mammary Carcinoma, Human	disease	C04;C17	Neoplastic Process	0.3	1	2014	2014	1	0	CTD_human
3190	HNRNPK	0.539	0.846	C4704874	Mammary Carcinoma, Human	disease	C04;C17	Neoplastic Process	0.3	1	2011	2011	1	0	CTD_human
3191	HNRNPL	0.663	0.5	C4704874	Mammary Carcinoma, Human	disease	C04;C17	Neoplastic Process	0.3	1	2011	2011	1	0	CTD_human
3240	HP	0.412	0.885	C4704874	Mammary Carcinoma, Human	disease	C04;C17	Neoplastic Process	0.3	1	2006	2006	1	0	CTD_human
3304	HSPA1B	0.474	0.808	C4704874	Mammary Carcinoma, Human	disease	C04;C17	Neoplastic Process	0.3	1	2005	2005	1	0	CTD_human
3320	HSP90AA1	0.411	0.923	C4704874	Mammary Carcinoma, Human	disease	C04;C17	Neoplastic Process	0.3	1	2010	2010	1	0	CTD_human
3479	IGF1	0.318	0.885	C4704874	Mammary Carcinoma, Human	disease	C04;C17	Neoplastic Process	0.3	1	2007	2008	2	0	CTD_human
3480	IGF1R	0.399	0.885	C4704874	Mammary Carcinoma, Human	disease	C04;C17	Neoplastic Process	0.3	1	2011	2011	1	0	CTD_human
3490	IGFBP7	0.476	0.769	C4704874	Mammary Carcinoma, Human	disease	C04;C17	Neoplastic Process	0.3	1	2003	2003	1	0	CTD_human
3692	EIF6	0.584	0.538	C4704874	Mammary Carcinoma, Human	disease	C04;C17	Neoplastic Process	0.3	1	2014	2014	1	0	CTD_human
3714	JAG2	0.576	0.846	C4704874	Mammary Carcinoma, Human	disease	C04;C17	Neoplastic Process	0.3	1	2010	2010	1	0	CTD_human
3845	KRAS	0.32	0.923	C4704874	Mammary Carcinoma, Human	disease	C04;C17	Neoplastic Process	0.3				0	0	CTD_human
3852	KRT5	0.512	0.731	C4704874	Mammary Carcinoma, Human	disease	C04;C17	Neoplastic Process	0.3	1	2014	2014	1	0	CTD_human
3856	KRT8	0.517	0.654	C4704874	Mammary Carcinoma, Human	disease	C04;C17	Neoplastic Process	0.3	1	2010	2010	1	0	CTD_human
3861	KRT14	0.53	0.731	C4704874	Mammary Carcinoma, Human	disease	C04;C17	Neoplastic Process	0.3	1	2014	2014	1	0	CTD_human
3875	KRT18	0.53	0.692	C4704874	Mammary Carcinoma, Human	disease	C04;C17	Neoplastic Process	0.3	1	2010	2014	2	0	CTD_human
3945	LDHB	0.604	0.615	C4704874	Mammary Carcinoma, Human	disease	C04;C17	Neoplastic Process	0.3	1	2013	2013	1	0	CTD_human
4017	LOXL2	0.527	0.731	C4704874	Mammary Carcinoma, Human	disease	C04;C17	Neoplastic Process	0.3	1	2009	2013	2	0	CTD_human
4240	MFGE8	0.548	0.808	C4704874	Mammary Carcinoma, Human	disease	C04;C17	Neoplastic Process	0.3	1	2011	2011	1	0	CTD_human
4282	MIF	0.412	0.885	C4704874	Mammary Carcinoma, Human	disease	C04;C17	Neoplastic Process	0.3	1	2009	2009	1	0	CTD_human
4548	MTR	0.482	0.808	C4704874	Mammary Carcinoma, Human	disease	C04;C17	Neoplastic Process	0.3	1	2007	2007	1	0	CTD_human
4627	MYH9	0.505	0.808	C4704874	Mammary Carcinoma, Human	disease	C04;C17	Neoplastic Process	0.3	1	2017	2017	1	0	CTD_human
4660	PPP1R12B	0.769	0.269	C4704874	Mammary Carcinoma, Human	disease	C04;C17	Neoplastic Process	0.3	1	2017	2017	1	0	CTD_human
4851	NOTCH1	0.369	0.885	C4704874	Mammary Carcinoma, Human	disease	C04;C17	Neoplastic Process	0.3	1	2010	2011	2	0	CTD_human
4853	NOTCH2	0.441	0.808	C4704874	Mammary Carcinoma, Human	disease	C04;C17	Neoplastic Process	0.3	1	2010	2010	1	0	CTD_human
4854	NOTCH3	0.435	0.808	C4704874	Mammary Carcinoma, Human	disease	C04;C17	Neoplastic Process	0.3	1	2010	2010	1	0	CTD_human
4904	YBX1	0.519	0.769	C4704874	Mammary Carcinoma, Human	disease	C04;C17	Neoplastic Process	0.3	1	2005	2005	1	0	CTD_human
5154	PDGFA	0.533	0.731	C4704874	Mammary Carcinoma, Human	disease	C04;C17	Neoplastic Process	0.3	1	2005	2005	1	0	CTD_human
5321	PLA2G4A	0.496	0.846	C4704874	Mammary Carcinoma, Human	disease	C04;C17	Neoplastic Process	0.3	1	2011	2011	1	0	CTD_human
5789	PTPRD	0.584	0.731	C4704874	Mammary Carcinoma, Human	disease	C04;C17	Neoplastic Process	0.3	1	2008	2008	1	0	CTD_human
5819	NECTIN2	0.575	0.769	C4704874	Mammary Carcinoma, Human	disease	C04;C17	Neoplastic Process	0.3	1	2013	2013	1	0	CTD_human
5935	RBM3	0.595	0.654	C4704874	Mammary Carcinoma, Human	disease	C04;C17	Neoplastic Process	0.3	1	2009	2009	1	0	CTD_human
6147	RPL23A	0.78	0.308	C4704874	Mammary Carcinoma, Human	disease	C04;C17	Neoplastic Process	0.3	1	2011	2011	1	0	CTD_human
6160	RPL31	0.78	0.308	C4704874	Mammary Carcinoma, Human	disease	C04;C17	Neoplastic Process	0.3	1	2011	2011	1	0	CTD_human
6181	RPLP2	0.805	0.192	C4704874	Mammary Carcinoma, Human	disease	C04;C17	Neoplastic Process	0.3	1	2018	2018	1	0	CTD_human
6191	RPS4X	0.711	0.5	C4704874	Mammary Carcinoma, Human	disease	C04;C17	Neoplastic Process	0.3	1	2011	2011	1	0	CTD_human
6194	RPS6	0.547	0.692	C4704874	Mammary Carcinoma, Human	disease	C04;C17	Neoplastic Process	0.3	1	2010	2010	1	0	CTD_human
6201	RPS7	0.682	0.462	C4704874	Mammary Carcinoma, Human	disease	C04;C17	Neoplastic Process	0.3	1	2011	2011	1	0	CTD_human
6202	RPS8	0.805	0.192	C4704874	Mammary Carcinoma, Human	disease	C04;C17	Neoplastic Process	0.3	1	2011	2011	1	0	CTD_human
6387	CXCL12	0.379	0.846	C4704874	Mammary Carcinoma, Human	disease	C04;C17	Neoplastic Process	0.31	1	2009	2019	1	0	CTD_human
6470	SHMT1	0.566	0.654	C4704874	Mammary Carcinoma, Human	disease	C04;C17	Neoplastic Process	0.3	1	2007	2007	1	0	CTD_human
6513	SLC2A1	0.388	0.808	C4704874	Mammary Carcinoma, Human	disease	C04;C17	Neoplastic Process	0.3	1	2010	2010	1	0	CTD_human
6696	SPP1	0.353	0.885	C4704874	Mammary Carcinoma, Human	disease	C04;C17	Neoplastic Process	0.3	1	2009	2012	2	0	CTD_human
6714	SRC	0.467	0.885	C4704874	Mammary Carcinoma, Human	disease	C04;C17	Neoplastic Process	0.3	1	2011	2011	1	0	CTD_human
6774	STAT3	0.32	0.923	C4704874	Mammary Carcinoma, Human	disease	C04;C17	Neoplastic Process	0.3	1	2004	2004	1	0	CTD_human
6817	SULT1A1	0.554	0.769	C4704874	Mammary Carcinoma, Human	disease	C04;C17	Neoplastic Process	0.3	1	2018	2018	1	0	CTD_human
7037	TFRC	0.437	0.885	C4704874	Mammary Carcinoma, Human	disease	C04;C17	Neoplastic Process	0.3	1	2006	2010	2	0	CTD_human
7052	TGM2	0.445	0.808	C4704874	Mammary Carcinoma, Human	disease	C04;C17	Neoplastic Process	0.3	1	2009	2009	1	0	CTD_human
7057	THBS1	0.407	0.885	C4704874	Mammary Carcinoma, Human	disease	C04;C17	Neoplastic Process	0.3	1	1997	1997	1	0	CTD_human
7153	TOP2A	0.497	0.731	C4704874	Mammary Carcinoma, Human	disease	C04;C17	Neoplastic Process	0.3	1	2001	2012	4	0	CTD_human
7157	TP53	0.236	0.962	C4704874	Mammary Carcinoma, Human	disease	C04;C17	Neoplastic Process	0.51	1	1999	2018	6	0	CTD_human
7295	TXN	0.447	0.885	C4704874	Mammary Carcinoma, Human	disease	C04;C17	Neoplastic Process	0.3	1	2018	2018	1	0	CTD_human
7372	UMPS	0.584	0.615	C4704874	Mammary Carcinoma, Human	disease	C04;C17	Neoplastic Process	0.3	1	2008	2009	2	0	CTD_human
7424	VEGFC	0.459	0.769	C4704874	Mammary Carcinoma, Human	disease	C04;C17	Neoplastic Process	0.3	1	2008	2015	2	0	CTD_human
7913	DEK	0.542	0.769	C4704874	Mammary Carcinoma, Human	disease	C04;C17	Neoplastic Process	0.3	1	2016	2016	1	0	CTD_human
8065	CUL5	0.691	0.577	C4704874	Mammary Carcinoma, Human	disease	C04;C17	Neoplastic Process	0.3	1	2011	2011	1	0	CTD_human
8085	KMT2D	0.465	0.808	C4704874	Mammary Carcinoma, Human	disease	C04;C17	Neoplastic Process	0.3	1	2015	2015	1	0	CTD_human
8894	EIF2S2	0.621	0.577	C4704874	Mammary Carcinoma, Human	disease	C04;C17	Neoplastic Process	0.3	1	2014	2014	1	0	CTD_human
9076	CLDN1	0.481	0.808	C4704874	Mammary Carcinoma, Human	disease	C04;C17	Neoplastic Process	0.3	1	2009	2013	2	0	CTD_human
9839	ZEB2	0.471	0.808	C4704874	Mammary Carcinoma, Human	disease	C04;C17	Neoplastic Process	0.3	1	2010	2010	1	0	CTD_human
10381	TUBB3	0.486	0.808	C4704874	Mammary Carcinoma, Human	disease	C04;C17	Neoplastic Process	0.3	1	2011	2011	1	0	CTD_human
10397	NDRG1	0.488	0.731	C4704874	Mammary Carcinoma, Human	disease	C04;C17	Neoplastic Process	0.3	1	2004	2004	1	0	CTD_human
10468	FST	0.513	0.731	C4704874	Mammary Carcinoma, Human	disease	C04;C17	Neoplastic Process	0.3	1	2005	2005	1	0	CTD_human
11009	IL24	0.498	0.769	C4704874	Mammary Carcinoma, Human	disease	C04;C17	Neoplastic Process	0.3	1	2005	2012	2	0	CTD_human
11041	B4GAT1	0.59	0.538	C4704874	Mammary Carcinoma, Human	disease	C04;C17	Neoplastic Process	0.3	1	2018	2018	1	0	CTD_human
22948	CCT5	0.663	0.462	C4704874	Mammary Carcinoma, Human	disease	C04;C17	Neoplastic Process	0.3	1	2008	2008	1	0	CTD_human
23345	SYNE1	0.511	0.846	C4704874	Mammary Carcinoma, Human	disease	C04;C17	Neoplastic Process	0.3	1	2008	2008	1	0	CTD_human
23411	SIRT1	0.378	0.885	C4704874	Mammary Carcinoma, Human	disease	C04;C17	Neoplastic Process	0.3	1	2010	2010	1	0	CTD_human
23705	CADM1	0.491	0.769	C4704874	Mammary Carcinoma, Human	disease	C04;C17	Neoplastic Process	0.3	1	2007	2007	1	0	CTD_human
26227	PHGDH	0.484	0.885	C4704874	Mammary Carcinoma, Human	disease	C04;C17	Neoplastic Process	0.3	1	2011	2011	1	0	CTD_human
26986	PABPC1	0.621	0.654	C4704874	Mammary Carcinoma, Human	disease	C04;C17	Neoplastic Process	0.3	1	2011	2011	1	0	CTD_human
51129	ANGPTL4	0.498	0.731	C4704874	Mammary Carcinoma, Human	disease	C04;C17	Neoplastic Process	0.3	1	2011	2011	1	0	CTD_human
79659	DYNC2H1	0.555	0.731	C4704874	Mammary Carcinoma, Human	disease	C04;C17	Neoplastic Process	0.3	1	2014	2014	1	0	CTD_human
133522	PPARGC1B	0.569	0.731	C4704874	Mammary Carcinoma, Human	disease	C04;C17	Neoplastic Process	0.3	1	2010	2010	1	0	CTD_human
135228	CD109	0.595	0.654	C4704874	Mammary Carcinoma, Human	disease	C04;C17	Neoplastic Process	0.3	1	2008	2008	1	0	CTD_human
404037	HAPLN4	0.805	0.154	C4704874	Mammary Carcinoma, Human	disease	C04;C17	Neoplastic Process	0.3	1	2018	2018	1	0	CTD_human
999	CDH1	0.401	0.808	C0021367	Mammary Ductal Carcinoma	disease	C04;C17	Neoplastic Process	0.3	1	1995	2007	2	0	CTD_human
1364	CLDN4	0.514	0.692	C0021367	Mammary Ductal Carcinoma	disease	C04;C17	Neoplastic Process	0.3	1	2009	2009	1	0	CTD_human
9368	SLC9A3R1	0.547	0.577	C0021367	Mammary Ductal Carcinoma	disease	C04;C17	Neoplastic Process	0.3	1	2017	2017	1	0	CTD_human
10	NAT2	0.451	0.885	C1458155	Mammary Neoplasms	group	C04;C17	Neoplastic Process	0.4	1	2002	2018	1	0	CTD_human
102	ADAM10	0.489	0.846	C1458155	Mammary Neoplasms	group	C04;C17	Neoplastic Process	0.31	0.5	2006	2017	1	0	CTD_human
226	ALDOA	0.631	0.615	C1458155	Mammary Neoplasms	group	C04;C17	Neoplastic Process	0.3	1	2010	2010	1	0	CTD_human
353	APRT	0.423	0.846	C1458155	Mammary Neoplasms	group	C04;C17	Neoplastic Process	0.32	1	1996	2009	1	0	CTD_human
396	ARHGDIA	0.663	0.577	C1458155	Mammary Neoplasms	group	C04;C17	Neoplastic Process	0.31	1	2010	2015	1	0	CTD_human
847	CAT	0.359	0.962	C1458155	Mammary Neoplasms	group	C04;C17	Neoplastic Process	0.35	1	1995	2018	1	0	CTD_human
857	CAV1	0.388	0.885	C1458155	Mammary Neoplasms	group	C04;C17	Neoplastic Process	0.4	1	1999	2017	4	0	CTD_human
999	CDH1	0.401	0.808	C1458155	Mammary Neoplasms	group	C04;C17	Neoplastic Process	0.4	1	2002	2019	4	0	CTD_human
1003	CDH5	0.561	0.692	C1458155	Mammary Neoplasms	group	C04;C17	Neoplastic Process	0.32	1	2008	2008	1	0	CTD_human
1072	CFL1	0.529	0.769	C1458155	Mammary Neoplasms	group	C04;C17	Neoplastic Process	0.31	1	1996	2010	1	0	CTD_human
1192	CLIC1	0.601	0.5	C1458155	Mammary Neoplasms	group	C04;C17	Neoplastic Process	0.3	1	2010	2010	1	0	CTD_human
1312	COMT	0.4	0.923	C1458155	Mammary Neoplasms	group	C04;C17	Neoplastic Process	0.38	1	1997	2008	3	0	CTD_human
1364	CLDN4	0.514	0.692	C1458155	Mammary Neoplasms	group	C04;C17	Neoplastic Process	0.32	1	2009	2012	1	0	CTD_human
1499	CTNNB1	0.303	0.885	C1458155	Mammary Neoplasms	group	C04;C17	Neoplastic Process	0.4	0.957	2000	2018	2	0	CTD_human
1719	DHFR	0.513	0.808	C1458155	Mammary Neoplasms	group	C04;C17	Neoplastic Process	0.3	1	2011	2017	2	0	CTD_human
1806	DPYD	0.493	0.846	C1458155	Mammary Neoplasms	group	C04;C17	Neoplastic Process	0.34	1	2002	2008	1	0	CTD_human
1938	EEF2	0.599	0.731	C1458155	Mammary Neoplasms	group	C04;C17	Neoplastic Process	0.31	1	2006	2010	1	0	CTD_human
1956	EGFR	0.295	0.885	C1458155	Mammary Neoplasms	group	C04;C17	Neoplastic Process	0.4	0.988	1990	2019	6	0	CTD_human
2023	ENO1	0.481	0.885	C1458155	Mammary Neoplasms	group	C04;C17	Neoplastic Process	0.32	1	2005	2019	1	0	CTD_human
2050	EPHB4	0.524	0.692	C1458155	Mammary Neoplasms	group	C04;C17	Neoplastic Process	0.31	1	2006	2013	1	0	CTD_human
2146	EZH2	0.376	0.885	C1458155	Mammary Neoplasms	group	C04;C17	Neoplastic Process	0.4	1	2003	2019	1	0	CTD_human
2152	F3	0.415	0.846	C1458155	Mammary Neoplasms	group	C04;C17	Neoplastic Process	0.36	1	2005	2017	1	0	CTD_human
2194	FASN	0.474	0.846	C1458155	Mammary Neoplasms	group	C04;C17	Neoplastic Process	0.4	1	1999	2017	2	0	CTD_human
2202	EFEMP1	0.54	0.769	C1458155	Mammary Neoplasms	group	C04;C17	Neoplastic Process	0.31	1	2009	2009	1	0	CTD_human
2260	FGFR1	0.362	0.885	C1458155	Mammary Neoplasms	group	C04;C17	Neoplastic Process	0.37	1	1998	2019	2	0	CTD_human
2316	FLNA	0.419	0.846	C1458155	Mammary Neoplasms	group	C04;C17	Neoplastic Process	0.3	1	2015	2015	1	0	CTD_human
2335	FN1	0.365	0.962	C1458155	Mammary Neoplasms	group	C04;C17	Neoplastic Process	0.4	1	2002	2019	1	0	CTD_human
2697	GJA1	0.393	0.885	C1458155	Mammary Neoplasms	group	C04;C17	Neoplastic Process	0.4	1	2001	2019	1	0	CTD_human
2771	GNAI2	0.636	0.577	C1458155	Mammary Neoplasms	group	C04;C17	Neoplastic Process	0.3	1	2009	2009	1	0	CTD_human
2821	GPI	0.491	0.769	C1458155	Mammary Neoplasms	group	C04;C17	Neoplastic Process	0.31	1	2003	2008	1	0	CTD_human
2876	GPX1	0.458	0.923	C1458155	Mammary Neoplasms	group	C04;C17	Neoplastic Process	0.34	1	2002	2008	1	0	CTD_human
2950	GSTP1	0.383	0.923	C1458155	Mammary Neoplasms	group	C04;C17	Neoplastic Process	0.4	1	2003	2017	1	0	CTD_human
3190	HNRNPK	0.539	0.846	C1458155	Mammary Neoplasms	group	C04;C17	Neoplastic Process	0.3	1	2011	2011	1	0	CTD_human
3191	HNRNPL	0.663	0.5	C1458155	Mammary Neoplasms	group	C04;C17	Neoplastic Process	0.3	1	2011	2011	1	0	CTD_human
3240	HP	0.412	0.885	C1458155	Mammary Neoplasms	group	C04;C17	Neoplastic Process	0.34	1	2004	2017	1	0	CTD_human
3304	HSPA1B	0.474	0.808	C1458155	Mammary Neoplasms	group	C04;C17	Neoplastic Process	0.3	1	2005	2005	1	0	CTD_human
3320	HSP90AA1	0.411	0.923	C1458155	Mammary Neoplasms	group	C04;C17	Neoplastic Process	0.35	1	2003	2019	1	0	CTD_human
3479	IGF1	0.318	0.885	C1458155	Mammary Neoplasms	group	C04;C17	Neoplastic Process	0.4	1	1990	2019	2	0	CTD_human
3480	IGF1R	0.399	0.885	C1458155	Mammary Neoplasms	group	C04;C17	Neoplastic Process	0.4	1	1992	2019	1	0	CTD_human
3490	IGFBP7	0.476	0.769	C1458155	Mammary Neoplasms	group	C04;C17	Neoplastic Process	0.34	1	2002	2018	1	0	CTD_human
3692	EIF6	0.584	0.538	C1458155	Mammary Neoplasms	group	C04;C17	Neoplastic Process	0.3	1	2014	2014	1	0	CTD_human
3714	JAG2	0.576	0.846	C1458155	Mammary Neoplasms	group	C04;C17	Neoplastic Process	0.3	1	2010	2010	1	0	CTD_human
3845	KRAS	0.32	0.923	C1458155	Mammary Neoplasms	group	C04;C17	Neoplastic Process	0.35	1	2010	2017	0	0	CTD_human
3852	KRT5	0.512	0.731	C1458155	Mammary Neoplasms	group	C04;C17	Neoplastic Process	0.32	1	2002	2016	1	0	CTD_human
3856	KRT8	0.517	0.654	C1458155	Mammary Neoplasms	group	C04;C17	Neoplastic Process	0.33	1	2003	2010	1	0	CTD_human
3861	KRT14	0.53	0.731	C1458155	Mammary Neoplasms	group	C04;C17	Neoplastic Process	0.31	1	2008	2014	1	0	CTD_human
3875	KRT18	0.53	0.692	C1458155	Mammary Neoplasms	group	C04;C17	Neoplastic Process	0.33	1	2003	2014	2	0	CTD_human
3945	LDHB	0.604	0.615	C1458155	Mammary Neoplasms	group	C04;C17	Neoplastic Process	0.3	1	2013	2013	1	0	CTD_human
4017	LOXL2	0.527	0.731	C1458155	Mammary Neoplasms	group	C04;C17	Neoplastic Process	0.3	1	2009	2013	2	0	CTD_human
4240	MFGE8	0.548	0.808	C1458155	Mammary Neoplasms	group	C04;C17	Neoplastic Process	0.32	1	2002	2011	1	0	CTD_human
4282	MIF	0.412	0.885	C1458155	Mammary Neoplasms	group	C04;C17	Neoplastic Process	0.32	1	2008	2012	1	0	CTD_human
4548	MTR	0.482	0.808	C1458155	Mammary Neoplasms	group	C04;C17	Neoplastic Process	0.32	0.667	2007	2009	1	0	CTD_human
4627	MYH9	0.505	0.808	C1458155	Mammary Neoplasms	group	C04;C17	Neoplastic Process	0.3	1	2017	2017	1	0	CTD_human
4660	PPP1R12B	0.769	0.269	C1458155	Mammary Neoplasms	group	C04;C17	Neoplastic Process	0.3	1	2017	2017	1	0	CTD_human
4851	NOTCH1	0.369	0.885	C1458155	Mammary Neoplasms	group	C04;C17	Neoplastic Process	0.38	1	2004	2018	2	0	CTD_human
4853	NOTCH2	0.441	0.808	C1458155	Mammary Neoplasms	group	C04;C17	Neoplastic Process	0.35	1	2004	2014	1	0	CTD_human
4854	NOTCH3	0.435	0.808	C1458155	Mammary Neoplasms	group	C04;C17	Neoplastic Process	0.36	1	2007	2018	1	0	CTD_human
4904	YBX1	0.519	0.769	C1458155	Mammary Neoplasms	group	C04;C17	Neoplastic Process	0.34	1	2005	2014	1	0	CTD_human
5154	PDGFA	0.533	0.731	C1458155	Mammary Neoplasms	group	C04;C17	Neoplastic Process	0.32	0.667	1989	2005	1	0	CTD_human
5321	PLA2G4A	0.496	0.846	C1458155	Mammary Neoplasms	group	C04;C17	Neoplastic Process	0.3	1	2011	2011	1	0	CTD_human
5789	PTPRD	0.584	0.731	C1458155	Mammary Neoplasms	group	C04;C17	Neoplastic Process	0.3	1	2008	2008	1	0	CTD_human
5819	NECTIN2	0.575	0.769	C1458155	Mammary Neoplasms	group	C04;C17	Neoplastic Process	0.3	1	2013	2013	1	0	CTD_human
5935	RBM3	0.595	0.654	C1458155	Mammary Neoplasms	group	C04;C17	Neoplastic Process	0.31	1	2006	2009	1	0	CTD_human
6147	RPL23A	0.78	0.308	C1458155	Mammary Neoplasms	group	C04;C17	Neoplastic Process	0.3	1	2011	2011	1	0	CTD_human
6160	RPL31	0.78	0.308	C1458155	Mammary Neoplasms	group	C04;C17	Neoplastic Process	0.3	1	2011	2011	1	0	CTD_human
6181	RPLP2	0.805	0.192	C1458155	Mammary Neoplasms	group	C04;C17	Neoplastic Process	0.3	1	2018	2018	1	0	CTD_human
6191	RPS4X	0.711	0.5	C1458155	Mammary Neoplasms	group	C04;C17	Neoplastic Process	0.3	1	2011	2011	1	0	CTD_human
6194	RPS6	0.547	0.692	C1458155	Mammary Neoplasms	group	C04;C17	Neoplastic Process	0.3	1	2010	2010	1	0	CTD_human
6201	RPS7	0.682	0.462	C1458155	Mammary Neoplasms	group	C04;C17	Neoplastic Process	0.3	1	2011	2011	1	0	CTD_human
6202	RPS8	0.805	0.192	C1458155	Mammary Neoplasms	group	C04;C17	Neoplastic Process	0.3	1	2011	2011	1	0	CTD_human
6387	CXCL12	0.379	0.846	C1458155	Mammary Neoplasms	group	C04;C17	Neoplastic Process	0.4	1	2003	2018	1	0	CTD_human
6470	SHMT1	0.566	0.654	C1458155	Mammary Neoplasms	group	C04;C17	Neoplastic Process	0.32	1	2006	2008	1	0	CTD_human
6513	SLC2A1	0.388	0.808	C1458155	Mammary Neoplasms	group	C04;C17	Neoplastic Process	0.38	1	2003	2018	1	0	CTD_human
6696	SPP1	0.353	0.885	C1458155	Mammary Neoplasms	group	C04;C17	Neoplastic Process	0.4	0.95	2002	2019	2	0	CTD_human
6714	SRC	0.467	0.885	C1458155	Mammary Neoplasms	group	C04;C17	Neoplastic Process	0.4	1	1998	2015	1	0	CTD_human
6774	STAT3	0.32	0.923	C1458155	Mammary Neoplasms	group	C04;C17	Neoplastic Process	0.4	1	2002	2020	1	0	CTD_human
6817	SULT1A1	0.554	0.769	C1458155	Mammary Neoplasms	group	C04;C17	Neoplastic Process	0.33	1	2002	2018	1	0	CTD_human
7037	TFRC	0.437	0.885	C1458155	Mammary Neoplasms	group	C04;C17	Neoplastic Process	0.31	1	2006	2015	2	0	CTD_human
7048	TGFBR2	0.413	0.846	C1458155	Mammary Neoplasms	group	C04;C17	Neoplastic Process	0.34	1	2001	2008	0	1	UNIPROT
7052	TGM2	0.445	0.808	C1458155	Mammary Neoplasms	group	C04;C17	Neoplastic Process	0.39	1	2001	2009	1	0	CTD_human
7057	THBS1	0.407	0.885	C1458155	Mammary Neoplasms	group	C04;C17	Neoplastic Process	0.34	1	1997	2017	1	0	CTD_human
7153	TOP2A	0.497	0.731	C1458155	Mammary Neoplasms	group	C04;C17	Neoplastic Process	0.4	0.947	1999	2015	4	0	CTD_human
7157	TP53	0.236	0.962	C1458155	Mammary Neoplasms	group	C04;C17	Neoplastic Process	0.7	0.984	1982	2020	6	84	CTD_human
7295	TXN	0.447	0.885	C1458155	Mammary Neoplasms	group	C04;C17	Neoplastic Process	0.3	1	2018	2018	1	0	CTD_human
7372	UMPS	0.584	0.615	C1458155	Mammary Neoplasms	group	C04;C17	Neoplastic Process	0.3	1	2008	2009	2	0	CTD_human
7424	VEGFC	0.459	0.769	C1458155	Mammary Neoplasms	group	C04;C17	Neoplastic Process	0.4	0.917	2003	2017	2	0	CTD_human
7913	DEK	0.542	0.769	C1458155	Mammary Neoplasms	group	C04;C17	Neoplastic Process	0.3	1	2016	2016	1	0	CTD_human
8065	CUL5	0.691	0.577	C1458155	Mammary Neoplasms	group	C04;C17	Neoplastic Process	0.31	1	2003	2011	1	0	CTD_human
8085	KMT2D	0.465	0.808	C1458155	Mammary Neoplasms	group	C04;C17	Neoplastic Process	0.31	1	2015	2019	1	0	CTD_human
8894	EIF2S2	0.621	0.577	C1458155	Mammary Neoplasms	group	C04;C17	Neoplastic Process	0.3	1	2014	2014	1	0	CTD_human
9076	CLDN1	0.481	0.808	C1458155	Mammary Neoplasms	group	C04;C17	Neoplastic Process	0.37	1	2000	2016	2	0	CTD_human
9839	ZEB2	0.471	0.808	C1458155	Mammary Neoplasms	group	C04;C17	Neoplastic Process	0.32	1	2006	2015	1	0	CTD_human
10381	TUBB3	0.486	0.808	C1458155	Mammary Neoplasms	group	C04;C17	Neoplastic Process	0.31	1	2007	2011	1	0	CTD_human
10397	NDRG1	0.488	0.731	C1458155	Mammary Neoplasms	group	C04;C17	Neoplastic Process	0.35	1	2004	2019	1	0	CTD_human
10468	FST	0.513	0.731	C1458155	Mammary Neoplasms	group	C04;C17	Neoplastic Process	0.32	1	2005	2018	1	0	CTD_human
11009	IL24	0.498	0.769	C1458155	Mammary Neoplasms	group	C04;C17	Neoplastic Process	0.35	1	1998	2015	2	0	CTD_human
11041	B4GAT1	0.59	0.538	C1458155	Mammary Neoplasms	group	C04;C17	Neoplastic Process	0.3	1	2018	2018	1	0	CTD_human
22948	CCT5	0.663	0.462	C1458155	Mammary Neoplasms	group	C04;C17	Neoplastic Process	0.3	1	2008	2008	1	0	CTD_human
23345	SYNE1	0.511	0.846	C1458155	Mammary Neoplasms	group	C04;C17	Neoplastic Process	0.3	1	2008	2008	1	0	CTD_human
23411	SIRT1	0.378	0.885	C1458155	Mammary Neoplasms	group	C04;C17	Neoplastic Process	0.34	1	2008	2019	1	0	CTD_human
23705	CADM1	0.491	0.769	C1458155	Mammary Neoplasms	group	C04;C17	Neoplastic Process	0.32	1	2002	2007	1	0	CTD_human
26227	PHGDH	0.484	0.885	C1458155	Mammary Neoplasms	group	C04;C17	Neoplastic Process	0.31	1	2011	2013	1	0	CTD_human
26986	PABPC1	0.621	0.654	C1458155	Mammary Neoplasms	group	C04;C17	Neoplastic Process	0.3	1	2011	2011	1	0	CTD_human
51129	ANGPTL4	0.498	0.731	C1458155	Mammary Neoplasms	group	C04;C17	Neoplastic Process	0.31	1	2011	2013	1	0	CTD_human
79659	DYNC2H1	0.555	0.731	C1458155	Mammary Neoplasms	group	C04;C17	Neoplastic Process	0.3	1	2014	2014	1	0	CTD_human
133522	PPARGC1B	0.569	0.731	C1458155	Mammary Neoplasms	group	C04;C17	Neoplastic Process	0.32	1	2006	2016	1	0	CTD_human
135228	CD109	0.595	0.654	C1458155	Mammary Neoplasms	group	C04;C17	Neoplastic Process	0.3	1	2008	2008	1	0	CTD_human
404037	HAPLN4	0.805	0.154	C1458155	Mammary Neoplasms	group	C04;C17	Neoplastic Process	0.3	1	2018	2018	1	0	CTD_human
60	ACTB	0.325	0.923	C0024668	Mammary Neoplasms, Experimental	phenotype	C04	Neoplastic Process; Experimental Model of Disease	0.3	1	2005	2005	1	0	CTD_human
81	ACTN4	0.508	0.808	C0024668	Mammary Neoplasms, Experimental	phenotype	C04	Neoplastic Process; Experimental Model of Disease	0.3	1	2002	2002	1	0	CTD_human
214	ALCAM	0.502	0.808	C0024668	Mammary Neoplasms, Experimental	phenotype	C04	Neoplastic Process; Experimental Model of Disease	0.3	1	2005	2005	1	0	CTD_human
301	ANXA1	0.442	0.885	C0024668	Mammary Neoplasms, Experimental	phenotype	C04	Neoplastic Process; Experimental Model of Disease	0.5	1	2002	2005	2	0	CTD_human
307	ANXA4	0.599	0.692	C0024668	Mammary Neoplasms, Experimental	phenotype	C04	Neoplastic Process; Experimental Model of Disease	0.3	1	2005	2005	1	0	CTD_human
358	AQP1	0.467	0.885	C0024668	Mammary Neoplasms, Experimental	phenotype	C04	Neoplastic Process; Experimental Model of Disease	0.3	1	2002	2002	1	0	CTD_human
832	CAPZB	0.729	0.308	C0024668	Mammary Neoplasms, Experimental	phenotype	C04	Neoplastic Process; Experimental Model of Disease	0.3	1	2005	2005	1	0	CTD_human
949	SCARB1	0.559	0.731	C0024668	Mammary Neoplasms, Experimental	phenotype	C04	Neoplastic Process; Experimental Model of Disease	0.3	1	2002	2002	1	0	CTD_human
960	CD44	0.363	0.962	C0024668	Mammary Neoplasms, Experimental	phenotype	C04	Neoplastic Process; Experimental Model of Disease	0.3	1	2011	2011	1	0	CTD_human
998	CDC42	0.458	0.846	C0024668	Mammary Neoplasms, Experimental	phenotype	C04	Neoplastic Process; Experimental Model of Disease	0.3	1	2005	2005	1	0	CTD_human
999	CDH1	0.401	0.808	C0024668	Mammary Neoplasms, Experimental	phenotype	C04	Neoplastic Process; Experimental Model of Disease	0.3	1	2005	2005	1	0	CTD_human
1915	EEF1A1	0.584	0.654	C0024668	Mammary Neoplasms, Experimental	phenotype	C04	Neoplastic Process; Experimental Model of Disease	0.3	1	2002	2002	1	0	CTD_human
1956	EGFR	0.295	0.885	C0024668	Mammary Neoplasms, Experimental	phenotype	C04	Neoplastic Process; Experimental Model of Disease	0.3	1	1989	1995	2	0	CTD_human
1984	EIF5A	0.612	0.692	C0024668	Mammary Neoplasms, Experimental	phenotype	C04	Neoplastic Process; Experimental Model of Disease	0.3	1	2005	2005	1	0	CTD_human
2023	ENO1	0.481	0.885	C0024668	Mammary Neoplasms, Experimental	phenotype	C04	Neoplastic Process; Experimental Model of Disease	0.3	1	2002	2002	1	0	CTD_human
2167	FABP4	0.5	0.808	C0024668	Mammary Neoplasms, Experimental	phenotype	C04	Neoplastic Process; Experimental Model of Disease	0.3	1	2005	2005	1	0	CTD_human
2180	ACSL1	0.617	0.577	C0024668	Mammary Neoplasms, Experimental	phenotype	C04	Neoplastic Process; Experimental Model of Disease	0.3	1	2005	2005	1	0	CTD_human
2202	EFEMP1	0.54	0.769	C0024668	Mammary Neoplasms, Experimental	phenotype	C04	Neoplastic Process; Experimental Model of Disease	0.3	1	2002	2002	1	0	CTD_human
2335	FN1	0.365	0.962	C0024668	Mammary Neoplasms, Experimental	phenotype	C04	Neoplastic Process; Experimental Model of Disease	0.3	1	2002	2002	1	0	CTD_human
2771	GNAI2	0.636	0.577	C0024668	Mammary Neoplasms, Experimental	phenotype	C04	Neoplastic Process; Experimental Model of Disease	0.3	1	2005	2005	1	0	CTD_human
3178	HNRNPA1	0.529	0.885	C0024668	Mammary Neoplasms, Experimental	phenotype	C04	Neoplastic Process; Experimental Model of Disease	0.3	1	2005	2005	1	0	CTD_human
3182	HNRNPAB	0.839	0.231	C0024668	Mammary Neoplasms, Experimental	phenotype	C04	Neoplastic Process; Experimental Model of Disease	0.3	1	2004	2004	1	0	CTD_human
3479	IGF1	0.318	0.885	C0024668	Mammary Neoplasms, Experimental	phenotype	C04	Neoplastic Process; Experimental Model of Disease	0.3	1	2004	2007	3	0	CTD_human
3852	KRT5	0.512	0.731	C0024668	Mammary Neoplasms, Experimental	phenotype	C04	Neoplastic Process; Experimental Model of Disease	0.3	1	2002	2002	1	0	CTD_human
4012	LNPEP	0.514	0.731	C0024668	Mammary Neoplasms, Experimental	phenotype	C04	Neoplastic Process; Experimental Model of Disease	0.5	1	2006	2006	1	0	CTD_human
4023	LPL	0.474	0.808	C0024668	Mammary Neoplasms, Experimental	phenotype	C04	Neoplastic Process; Experimental Model of Disease	0.3	1	2002	2002	1	0	CTD_human
4072	EPCAM	0.451	0.885	C0024668	Mammary Neoplasms, Experimental	phenotype	C04	Neoplastic Process; Experimental Model of Disease	0.3	1	2005	2005	1	0	CTD_human
4191	MDH2	0.595	0.731	C0024668	Mammary Neoplasms, Experimental	phenotype	C04	Neoplastic Process; Experimental Model of Disease	0.3	1	2002	2002	1	0	CTD_human
4282	MIF	0.412	0.885	C0024668	Mammary Neoplasms, Experimental	phenotype	C04	Neoplastic Process; Experimental Model of Disease	0.3	1	2002	2002	1	0	CTD_human
5037	PEBP1	0.5	0.808	C0024668	Mammary Neoplasms, Experimental	phenotype	C04	Neoplastic Process; Experimental Model of Disease	0.3	1	2002	2002	1	0	CTD_human
5154	PDGFA	0.533	0.731	C0024668	Mammary Neoplasms, Experimental	phenotype	C04	Neoplastic Process; Experimental Model of Disease	0.3	1	2002	2005	2	0	CTD_human
5223	PGAM1	0.621	0.615	C0024668	Mammary Neoplasms, Experimental	phenotype	C04	Neoplastic Process; Experimental Model of Disease	0.3	1	2005	2005	1	0	CTD_human
5315	PKM	0.482	0.808	C0024668	Mammary Neoplasms, Experimental	phenotype	C04	Neoplastic Process; Experimental Model of Disease	0.3	1	2005	2005	1	0	CTD_human
5685	PSMA4	0.716	0.385	C0024668	Mammary Neoplasms, Experimental	phenotype	C04	Neoplastic Process; Experimental Model of Disease	0.3	1	2005	2005	1	0	CTD_human
5720	PSME1	0.736	0.462	C0024668	Mammary Neoplasms, Experimental	phenotype	C04	Neoplastic Process; Experimental Model of Disease	0.3	1	2005	2005	1	0	CTD_human
5725	PTBP1	0.517	0.769	C0024668	Mammary Neoplasms, Experimental	phenotype	C04	Neoplastic Process; Experimental Model of Disease	0.3	1	2002	2002	1	0	CTD_human
5747	PTK2	0.497	0.808	C0024668	Mammary Neoplasms, Experimental	phenotype	C04	Neoplastic Process; Experimental Model of Disease	0.5	1	2005	2014	1	0	CTD_human
5901	RAN	0.576	0.808	C0024668	Mammary Neoplasms, Experimental	phenotype	C04	Neoplastic Process; Experimental Model of Disease	0.3	1	2002	2005	2	0	CTD_human
5947	RBP1	0.565	0.731	C0024668	Mammary Neoplasms, Experimental	phenotype	C04	Neoplastic Process; Experimental Model of Disease	0.3	1	2002	2002	1	0	CTD_human
6051	RNPEP	0.705	0.385	C0024668	Mammary Neoplasms, Experimental	phenotype	C04	Neoplastic Process; Experimental Model of Disease	0.5	1	2006	2006	1	0	CTD_human
6122	RPL3	0.736	0.462	C0024668	Mammary Neoplasms, Experimental	phenotype	C04	Neoplastic Process; Experimental Model of Disease	0.3	1	2005	2005	1	0	CTD_human
6128	RPL6	0.7	0.385	C0024668	Mammary Neoplasms, Experimental	phenotype	C04	Neoplastic Process; Experimental Model of Disease	0.3	1	2002	2002	1	0	CTD_human
6208	RPS14	0.631	0.5	C0024668	Mammary Neoplasms, Experimental	phenotype	C04	Neoplastic Process; Experimental Model of Disease	0.3	1	2005	2005	1	0	CTD_human
6277	S100A6	0.51	0.808	C0024668	Mammary Neoplasms, Experimental	phenotype	C04	Neoplastic Process; Experimental Model of Disease	0.3	1	2005	2005	1	0	CTD_human
6558	SLC12A2	0.552	0.808	C0024668	Mammary Neoplasms, Experimental	phenotype	C04	Neoplastic Process; Experimental Model of Disease	0.3	1	2002	2002	1	0	CTD_human
6634	SNRPD3	0.78	0.192	C0024668	Mammary Neoplasms, Experimental	phenotype	C04	Neoplastic Process; Experimental Model of Disease	0.3	1	2005	2005	1	0	CTD_human
6696	SPP1	0.353	0.885	C0024668	Mammary Neoplasms, Experimental	phenotype	C04	Neoplastic Process; Experimental Model of Disease	0.3	1	2004	2004	1	0	CTD_human
6774	STAT3	0.32	0.923	C0024668	Mammary Neoplasms, Experimental	phenotype	C04	Neoplastic Process; Experimental Model of Disease	0.3	1	2005	2005	1	0	CTD_human
7001	PRDX2	0.474	0.885	C0024668	Mammary Neoplasms, Experimental	phenotype	C04	Neoplastic Process; Experimental Model of Disease	0.3	1	2005	2005	1	0	CTD_human
7018	TF	0.527	0.846	C0024668	Mammary Neoplasms, Experimental	phenotype	C04	Neoplastic Process; Experimental Model of Disease	0.3	1	1998	2005	2	0	CTD_human
7086	TKT	0.595	0.769	C0024668	Mammary Neoplasms, Experimental	phenotype	C04	Neoplastic Process; Experimental Model of Disease	0.3	1	2002	2002	1	0	CTD_human
7227	TRPS1	0.537	0.769	C0024668	Mammary Neoplasms, Experimental	phenotype	C04	Neoplastic Process; Experimental Model of Disease	0.3	1	2005	2005	1	0	CTD_human
7430	EZR	0.476	0.808	C0024668	Mammary Neoplasms, Experimental	phenotype	C04	Neoplastic Process; Experimental Model of Disease	0.3	1	2002	2002	1	0	CTD_human
7534	YWHAZ	0.475	0.846	C0024668	Mammary Neoplasms, Experimental	phenotype	C04	Neoplastic Process; Experimental Model of Disease	0.3	1	2002	2002	1	0	CTD_human
8673	VAMP8	0.61	0.731	C0024668	Mammary Neoplasms, Experimental	phenotype	C04	Neoplastic Process; Experimental Model of Disease	0.3	1	2005	2005	1	0	CTD_human
9902	MRC2	0.705	0.385	C0024668	Mammary Neoplasms, Experimental	phenotype	C04	Neoplastic Process; Experimental Model of Disease	0.3	1	2005	2005	1	0	CTD_human
10409	BASP1	0.666	0.5	C0024668	Mammary Neoplasms, Experimental	phenotype	C04	Neoplastic Process; Experimental Model of Disease	0.3	1	2002	2002	1	0	CTD_human
10653	SPINT2	0.556	0.808	C0024668	Mammary Neoplasms, Experimental	phenotype	C04	Neoplastic Process; Experimental Model of Disease	0.3	1	2005	2005	1	0	CTD_human
10769	PLK2	0.575	0.808	C0024668	Mammary Neoplasms, Experimental	phenotype	C04	Neoplastic Process; Experimental Model of Disease	0.3	1	2002	2002	1	0	CTD_human
23569	PADI4	0.494	0.808	C0024668	Mammary Neoplasms, Experimental	phenotype	C04	Neoplastic Process; Experimental Model of Disease	0.3	1	2002	2002	1	0	CTD_human
51599	LSR	0.666	0.538	C0024668	Mammary Neoplasms, Experimental	phenotype	C04	Neoplastic Process; Experimental Model of Disease	0.3	1	2002	2005	2	0	CTD_human
10	NAT2	0.451	0.885	C1257931	Mammary Neoplasms, Human	disease	C04;C17	Neoplastic Process	0.3	1	2009	2009	1	0	CTD_human
102	ADAM10	0.489	0.846	C1257931	Mammary Neoplasms, Human	disease	C04;C17	Neoplastic Process	0.3	1	2006	2006	1	0	CTD_human
226	ALDOA	0.631	0.615	C1257931	Mammary Neoplasms, Human	disease	C04;C17	Neoplastic Process	0.3	1	2010	2010	1	0	CTD_human
353	APRT	0.423	0.846	C1257931	Mammary Neoplasms, Human	disease	C04;C17	Neoplastic Process	0.3	1	2008	2008	1	0	CTD_human
396	ARHGDIA	0.663	0.577	C1257931	Mammary Neoplasms, Human	disease	C04;C17	Neoplastic Process	0.3	1	2010	2010	1	0	CTD_human
847	CAT	0.359	0.962	C1257931	Mammary Neoplasms, Human	disease	C04;C17	Neoplastic Process	0.3	1	2014	2014	1	0	CTD_human
857	CAV1	0.388	0.885	C1257931	Mammary Neoplasms, Human	disease	C04;C17	Neoplastic Process	0.3	1	2009	2011	4	0	CTD_human
999	CDH1	0.401	0.808	C1257931	Mammary Neoplasms, Human	disease	C04;C17	Neoplastic Process	0.3	1	2007	2013	4	0	CTD_human
1003	CDH5	0.561	0.692	C1257931	Mammary Neoplasms, Human	disease	C04;C17	Neoplastic Process	0.3	1	2008	2008	1	0	CTD_human
1072	CFL1	0.529	0.769	C1257931	Mammary Neoplasms, Human	disease	C04;C17	Neoplastic Process	0.3	1	2010	2010	1	0	CTD_human
1192	CLIC1	0.601	0.5	C1257931	Mammary Neoplasms, Human	disease	C04;C17	Neoplastic Process	0.3	1	2010	2010	1	0	CTD_human
1312	COMT	0.4	0.923	C1257931	Mammary Neoplasms, Human	disease	C04;C17	Neoplastic Process	0.3	1	1997	2005	3	0	CTD_human
1364	CLDN4	0.514	0.692	C1257931	Mammary Neoplasms, Human	disease	C04;C17	Neoplastic Process	0.3	1	2009	2009	1	0	CTD_human
1499	CTNNB1	0.303	0.885	C1257931	Mammary Neoplasms, Human	disease	C04;C17	Neoplastic Process	0.3	1	2002	2014	2	0	CTD_human
1719	DHFR	0.513	0.808	C1257931	Mammary Neoplasms, Human	disease	C04;C17	Neoplastic Process	0.3	1	2011	2017	2	0	CTD_human
1806	DPYD	0.493	0.846	C1257931	Mammary Neoplasms, Human	disease	C04;C17	Neoplastic Process	0.3	1	2008	2008	1	0	CTD_human
1938	EEF2	0.599	0.731	C1257931	Mammary Neoplasms, Human	disease	C04;C17	Neoplastic Process	0.3	1	2010	2010	1	0	CTD_human
1956	EGFR	0.295	0.885	C1257931	Mammary Neoplasms, Human	disease	C04;C17	Neoplastic Process	0.3	1	2006	2013	6	0	CTD_human
2023	ENO1	0.481	0.885	C1257931	Mammary Neoplasms, Human	disease	C04;C17	Neoplastic Process	0.3	1	2010	2010	1	0	CTD_human
2050	EPHB4	0.524	0.692	C1257931	Mammary Neoplasms, Human	disease	C04;C17	Neoplastic Process	0.3	1	2013	2013	1	0	CTD_human
2146	EZH2	0.376	0.885	C1257931	Mammary Neoplasms, Human	disease	C04;C17	Neoplastic Process	0.3	1	2011	2011	1	0	CTD_human
2152	F3	0.415	0.846	C1257931	Mammary Neoplasms, Human	disease	C04;C17	Neoplastic Process	0.3	1	2005	2005	1	0	CTD_human
2194	FASN	0.474	0.846	C1257931	Mammary Neoplasms, Human	disease	C04;C17	Neoplastic Process	0.3	1	2006	2008	2	0	CTD_human
2202	EFEMP1	0.54	0.769	C1257931	Mammary Neoplasms, Human	disease	C04;C17	Neoplastic Process	0.3	1	2009	2009	1	0	CTD_human
2260	FGFR1	0.362	0.885	C1257931	Mammary Neoplasms, Human	disease	C04;C17	Neoplastic Process	0.3	1	2010	2011	2	0	CTD_human
2316	FLNA	0.419	0.846	C1257931	Mammary Neoplasms, Human	disease	C04;C17	Neoplastic Process	0.3	1	2015	2015	1	0	CTD_human
2335	FN1	0.365	0.962	C1257931	Mammary Neoplasms, Human	disease	C04;C17	Neoplastic Process	0.3	1	2013	2013	1	0	CTD_human
2697	GJA1	0.393	0.885	C1257931	Mammary Neoplasms, Human	disease	C04;C17	Neoplastic Process	0.3	1	2018	2018	1	0	CTD_human
2771	GNAI2	0.636	0.577	C1257931	Mammary Neoplasms, Human	disease	C04;C17	Neoplastic Process	0.3	1	2009	2009	1	0	CTD_human
2821	GPI	0.491	0.769	C1257931	Mammary Neoplasms, Human	disease	C04;C17	Neoplastic Process	0.3	1	2008	2008	1	0	CTD_human
2876	GPX1	0.458	0.923	C1257931	Mammary Neoplasms, Human	disease	C04;C17	Neoplastic Process	0.3	1	2003	2003	1	0	CTD_human
2950	GSTP1	0.383	0.923	C1257931	Mammary Neoplasms, Human	disease	C04;C17	Neoplastic Process	0.3	1	2014	2014	1	0	CTD_human
3190	HNRNPK	0.539	0.846	C1257931	Mammary Neoplasms, Human	disease	C04;C17	Neoplastic Process	0.3	1	2011	2011	1	0	CTD_human
3191	HNRNPL	0.663	0.5	C1257931	Mammary Neoplasms, Human	disease	C04;C17	Neoplastic Process	0.3	1	2011	2011	1	0	CTD_human
3240	HP	0.412	0.885	C1257931	Mammary Neoplasms, Human	disease	C04;C17	Neoplastic Process	0.3	1	2006	2006	1	0	CTD_human
3304	HSPA1B	0.474	0.808	C1257931	Mammary Neoplasms, Human	disease	C04;C17	Neoplastic Process	0.3	1	2005	2005	1	0	CTD_human
3320	HSP90AA1	0.411	0.923	C1257931	Mammary Neoplasms, Human	disease	C04;C17	Neoplastic Process	0.3	1	2010	2010	1	0	CTD_human
3479	IGF1	0.318	0.885	C1257931	Mammary Neoplasms, Human	disease	C04;C17	Neoplastic Process	0.3	1	2007	2008	2	0	CTD_human
3480	IGF1R	0.399	0.885	C1257931	Mammary Neoplasms, Human	disease	C04;C17	Neoplastic Process	0.3	1	2011	2011	1	0	CTD_human
3490	IGFBP7	0.476	0.769	C1257931	Mammary Neoplasms, Human	disease	C04;C17	Neoplastic Process	0.3	1	2003	2003	1	0	CTD_human
3692	EIF6	0.584	0.538	C1257931	Mammary Neoplasms, Human	disease	C04;C17	Neoplastic Process	0.3	1	2014	2014	1	0	CTD_human
3714	JAG2	0.576	0.846	C1257931	Mammary Neoplasms, Human	disease	C04;C17	Neoplastic Process	0.3	1	2010	2010	1	0	CTD_human
3845	KRAS	0.32	0.923	C1257931	Mammary Neoplasms, Human	disease	C04;C17	Neoplastic Process	0.3				0	0	CTD_human
3852	KRT5	0.512	0.731	C1257931	Mammary Neoplasms, Human	disease	C04;C17	Neoplastic Process	0.3	1	2014	2014	1	0	CTD_human
3856	KRT8	0.517	0.654	C1257931	Mammary Neoplasms, Human	disease	C04;C17	Neoplastic Process	0.3	1	2010	2010	1	0	CTD_human
3861	KRT14	0.53	0.731	C1257931	Mammary Neoplasms, Human	disease	C04;C17	Neoplastic Process	0.3	1	2014	2014	1	0	CTD_human
3875	KRT18	0.53	0.692	C1257931	Mammary Neoplasms, Human	disease	C04;C17	Neoplastic Process	0.3	1	2010	2014	2	0	CTD_human
3945	LDHB	0.604	0.615	C1257931	Mammary Neoplasms, Human	disease	C04;C17	Neoplastic Process	0.3	1	2013	2013	1	0	CTD_human
4017	LOXL2	0.527	0.731	C1257931	Mammary Neoplasms, Human	disease	C04;C17	Neoplastic Process	0.3	1	2009	2013	2	0	CTD_human
4240	MFGE8	0.548	0.808	C1257931	Mammary Neoplasms, Human	disease	C04;C17	Neoplastic Process	0.3	1	2011	2011	1	0	CTD_human
4282	MIF	0.412	0.885	C1257931	Mammary Neoplasms, Human	disease	C04;C17	Neoplastic Process	0.3	1	2009	2009	1	0	CTD_human
4548	MTR	0.482	0.808	C1257931	Mammary Neoplasms, Human	disease	C04;C17	Neoplastic Process	0.3	1	2007	2007	1	0	CTD_human
4627	MYH9	0.505	0.808	C1257931	Mammary Neoplasms, Human	disease	C04;C17	Neoplastic Process	0.3	1	2017	2017	1	0	CTD_human
4660	PPP1R12B	0.769	0.269	C1257931	Mammary Neoplasms, Human	disease	C04;C17	Neoplastic Process	0.3	1	2017	2017	1	0	CTD_human
4851	NOTCH1	0.369	0.885	C1257931	Mammary Neoplasms, Human	disease	C04;C17	Neoplastic Process	0.3	1	2010	2011	2	0	CTD_human
4853	NOTCH2	0.441	0.808	C1257931	Mammary Neoplasms, Human	disease	C04;C17	Neoplastic Process	0.3	1	2010	2010	1	0	CTD_human
4854	NOTCH3	0.435	0.808	C1257931	Mammary Neoplasms, Human	disease	C04;C17	Neoplastic Process	0.3	1	2010	2010	1	0	CTD_human
4904	YBX1	0.519	0.769	C1257931	Mammary Neoplasms, Human	disease	C04;C17	Neoplastic Process	0.3	1	2005	2005	1	0	CTD_human
5154	PDGFA	0.533	0.731	C1257931	Mammary Neoplasms, Human	disease	C04;C17	Neoplastic Process	0.3	1	2005	2005	1	0	CTD_human
5321	PLA2G4A	0.496	0.846	C1257931	Mammary Neoplasms, Human	disease	C04;C17	Neoplastic Process	0.3	1	2011	2011	1	0	CTD_human
5789	PTPRD	0.584	0.731	C1257931	Mammary Neoplasms, Human	disease	C04;C17	Neoplastic Process	0.3	1	2008	2008	1	0	CTD_human
5819	NECTIN2	0.575	0.769	C1257931	Mammary Neoplasms, Human	disease	C04;C17	Neoplastic Process	0.3	1	2013	2013	1	0	CTD_human
5935	RBM3	0.595	0.654	C1257931	Mammary Neoplasms, Human	disease	C04;C17	Neoplastic Process	0.3	1	2009	2009	1	0	CTD_human
6147	RPL23A	0.78	0.308	C1257931	Mammary Neoplasms, Human	disease	C04;C17	Neoplastic Process	0.3	1	2011	2011	1	0	CTD_human
6160	RPL31	0.78	0.308	C1257931	Mammary Neoplasms, Human	disease	C04;C17	Neoplastic Process	0.3	1	2011	2011	1	0	CTD_human
6181	RPLP2	0.805	0.192	C1257931	Mammary Neoplasms, Human	disease	C04;C17	Neoplastic Process	0.3	1	2018	2018	1	0	CTD_human
6191	RPS4X	0.711	0.5	C1257931	Mammary Neoplasms, Human	disease	C04;C17	Neoplastic Process	0.3	1	2011	2011	1	0	CTD_human
6194	RPS6	0.547	0.692	C1257931	Mammary Neoplasms, Human	disease	C04;C17	Neoplastic Process	0.3	1	2010	2010	1	0	CTD_human
6201	RPS7	0.682	0.462	C1257931	Mammary Neoplasms, Human	disease	C04;C17	Neoplastic Process	0.3	1	2011	2011	1	0	CTD_human
6202	RPS8	0.805	0.192	C1257931	Mammary Neoplasms, Human	disease	C04;C17	Neoplastic Process	0.3	1	2011	2011	1	0	CTD_human
6387	CXCL12	0.379	0.846	C1257931	Mammary Neoplasms, Human	disease	C04;C17	Neoplastic Process	0.3	1	2009	2009	1	0	CTD_human
6470	SHMT1	0.566	0.654	C1257931	Mammary Neoplasms, Human	disease	C04;C17	Neoplastic Process	0.3	1	2007	2007	1	0	CTD_human
6513	SLC2A1	0.388	0.808	C1257931	Mammary Neoplasms, Human	disease	C04;C17	Neoplastic Process	0.3	1	2010	2010	1	0	CTD_human
6696	SPP1	0.353	0.885	C1257931	Mammary Neoplasms, Human	disease	C04;C17	Neoplastic Process	0.3	1	2009	2012	2	0	CTD_human
6714	SRC	0.467	0.885	C1257931	Mammary Neoplasms, Human	disease	C04;C17	Neoplastic Process	0.3	1	2011	2011	1	0	CTD_human
6774	STAT3	0.32	0.923	C1257931	Mammary Neoplasms, Human	disease	C04;C17	Neoplastic Process	0.3	1	2004	2004	1	0	CTD_human
6817	SULT1A1	0.554	0.769	C1257931	Mammary Neoplasms, Human	disease	C04;C17	Neoplastic Process	0.3	1	2018	2018	1	0	CTD_human
7037	TFRC	0.437	0.885	C1257931	Mammary Neoplasms, Human	disease	C04;C17	Neoplastic Process	0.3	1	2006	2010	2	0	CTD_human
7052	TGM2	0.445	0.808	C1257931	Mammary Neoplasms, Human	disease	C04;C17	Neoplastic Process	0.3	1	2009	2009	1	0	CTD_human
7057	THBS1	0.407	0.885	C1257931	Mammary Neoplasms, Human	disease	C04;C17	Neoplastic Process	0.3	1	1997	1997	1	0	CTD_human
7153	TOP2A	0.497	0.731	C1257931	Mammary Neoplasms, Human	disease	C04;C17	Neoplastic Process	0.3	1	2001	2012	4	0	CTD_human
7157	TP53	0.236	0.962	C1257931	Mammary Neoplasms, Human	disease	C04;C17	Neoplastic Process	0.5	1	2002	2018	6	0	CTD_human
7295	TXN	0.447	0.885	C1257931	Mammary Neoplasms, Human	disease	C04;C17	Neoplastic Process	0.3	1	2018	2018	1	0	CTD_human
7372	UMPS	0.584	0.615	C1257931	Mammary Neoplasms, Human	disease	C04;C17	Neoplastic Process	0.3	1	2008	2009	2	0	CTD_human
7424	VEGFC	0.459	0.769	C1257931	Mammary Neoplasms, Human	disease	C04;C17	Neoplastic Process	0.3	1	2008	2015	2	0	CTD_human
7913	DEK	0.542	0.769	C1257931	Mammary Neoplasms, Human	disease	C04;C17	Neoplastic Process	0.3	1	2016	2016	1	0	CTD_human
8065	CUL5	0.691	0.577	C1257931	Mammary Neoplasms, Human	disease	C04;C17	Neoplastic Process	0.3	1	2011	2011	1	0	CTD_human
8085	KMT2D	0.465	0.808	C1257931	Mammary Neoplasms, Human	disease	C04;C17	Neoplastic Process	0.3	1	2015	2015	1	0	CTD_human
8894	EIF2S2	0.621	0.577	C1257931	Mammary Neoplasms, Human	disease	C04;C17	Neoplastic Process	0.3	1	2014	2014	1	0	CTD_human
9076	CLDN1	0.481	0.808	C1257931	Mammary Neoplasms, Human	disease	C04;C17	Neoplastic Process	0.3	1	2009	2013	2	0	CTD_human
9839	ZEB2	0.471	0.808	C1257931	Mammary Neoplasms, Human	disease	C04;C17	Neoplastic Process	0.3	1	2010	2010	1	0	CTD_human
10381	TUBB3	0.486	0.808	C1257931	Mammary Neoplasms, Human	disease	C04;C17	Neoplastic Process	0.3	1	2011	2011	1	0	CTD_human
10397	NDRG1	0.488	0.731	C1257931	Mammary Neoplasms, Human	disease	C04;C17	Neoplastic Process	0.3	1	2004	2004	1	0	CTD_human
10468	FST	0.513	0.731	C1257931	Mammary Neoplasms, Human	disease	C04;C17	Neoplastic Process	0.3	1	2005	2005	1	0	CTD_human
11009	IL24	0.498	0.769	C1257931	Mammary Neoplasms, Human	disease	C04;C17	Neoplastic Process	0.3	1	2005	2012	2	0	CTD_human
11041	B4GAT1	0.59	0.538	C1257931	Mammary Neoplasms, Human	disease	C04;C17	Neoplastic Process	0.3	1	2018	2018	1	0	CTD_human
22948	CCT5	0.663	0.462	C1257931	Mammary Neoplasms, Human	disease	C04;C17	Neoplastic Process	0.3	1	2008	2008	1	0	CTD_human
23345	SYNE1	0.511	0.846	C1257931	Mammary Neoplasms, Human	disease	C04;C17	Neoplastic Process	0.3	1	2008	2008	1	0	CTD_human
23411	SIRT1	0.378	0.885	C1257931	Mammary Neoplasms, Human	disease	C04;C17	Neoplastic Process	0.3	1	2010	2010	1	0	CTD_human
23705	CADM1	0.491	0.769	C1257931	Mammary Neoplasms, Human	disease	C04;C17	Neoplastic Process	0.3	1	2007	2007	1	0	CTD_human
26227	PHGDH	0.484	0.885	C1257931	Mammary Neoplasms, Human	disease	C04;C17	Neoplastic Process	0.3	1	2011	2011	1	0	CTD_human
26986	PABPC1	0.621	0.654	C1257931	Mammary Neoplasms, Human	disease	C04;C17	Neoplastic Process	0.3	1	2011	2011	1	0	CTD_human
51129	ANGPTL4	0.498	0.731	C1257931	Mammary Neoplasms, Human	disease	C04;C17	Neoplastic Process	0.3	1	2011	2011	1	0	CTD_human
79659	DYNC2H1	0.555	0.731	C1257931	Mammary Neoplasms, Human	disease	C04;C17	Neoplastic Process	0.3	1	2014	2014	1	0	CTD_human
133522	PPARGC1B	0.569	0.731	C1257931	Mammary Neoplasms, Human	disease	C04;C17	Neoplastic Process	0.3	1	2010	2010	1	0	CTD_human
135228	CD109	0.595	0.654	C1257931	Mammary Neoplasms, Human	disease	C04;C17	Neoplastic Process	0.3	1	2008	2008	1	0	CTD_human
404037	HAPLN4	0.805	0.154	C1257931	Mammary Neoplasms, Human	disease	C04;C17	Neoplastic Process	0.3	1	2018	2018	1	0	CTD_human
226	ALDOA	0.631	0.615	C0027627	Neoplasm Metastasis	phenotype	C23;C04	Neoplastic Process	0.31	1	2010	2018	1	0	CTD_human
301	ANXA1	0.442	0.885	C0027627	Neoplasm Metastasis	phenotype	C23;C04	Neoplastic Process	0.6	0.958	1998	2019	1	0	CTD_human
307	ANXA4	0.599	0.692	C0027627	Neoplasm Metastasis	phenotype	C23;C04	Neoplastic Process	0.33	1	2007	2019	1	0	CTD_human
389	RHOC	0.641	0.308	C0027627	Neoplasm Metastasis	phenotype	C23;C04	Neoplastic Process	0.4	1	2003	2019	1	0	CTD_human
396	ARHGDIA	0.663	0.577	C0027627	Neoplasm Metastasis	phenotype	C23;C04	Neoplastic Process	0.35	1	2008	2016	1	0	CTD_human
558	AXL	0.489	0.615	C0027627	Neoplasm Metastasis	phenotype	C23;C04	Neoplastic Process	0.4	1	1999	2019	1	0	CTD_human
682	BSG	0.458	0.769	C0027627	Neoplasm Metastasis	phenotype	C23;C04	Neoplastic Process	0.4	0.974	2003	2020	1	0	CTD_human
847	CAT	0.359	0.962	C0027627	Neoplasm Metastasis	phenotype	C23;C04	Neoplastic Process	0.39	1	1996	2019	3	0	CTD_human
857	CAV1	0.388	0.885	C0027627	Neoplasm Metastasis	phenotype	C23;C04	Neoplastic Process	0.4	0.99	2001	2019	1	0	CTD_human
960	CD44	0.363	0.962	C0027627	Neoplasm Metastasis	phenotype	C23;C04	Neoplastic Process	0.4	0.979	1990	2020	1	0	CTD_human
999	CDH1	0.401	0.808	C0027627	Neoplasm Metastasis	phenotype	C23;C04	Neoplastic Process	0.4	0.96	1993	2020	2	0	CTD_human
1072	CFL1	0.529	0.769	C0027627	Neoplasm Metastasis	phenotype	C23;C04	Neoplastic Process	0.39	1	2010	2019	1	0	CTD_human
1192	CLIC1	0.601	0.5	C0027627	Neoplasm Metastasis	phenotype	C23;C04	Neoplastic Process	0.37	1	2009	2019	1	0	CTD_human
1499	CTNNB1	0.303	0.885	C0027627	Neoplasm Metastasis	phenotype	C23;C04	Neoplastic Process	0.4	0.962	1996	2020	1	0	CTD_human
1636	ACE	0.328	0.923	C0027627	Neoplasm Metastasis	phenotype	C23;C04	Neoplastic Process	0.35	1	2007	2019	1	0	CTD_human
1719	DHFR	0.513	0.808	C0027627	Neoplasm Metastasis	phenotype	C23;C04	Neoplastic Process	0.55	1	1994	2019	1	0	CTD_human
1806	DPYD	0.493	0.846	C0027627	Neoplasm Metastasis	phenotype	C23;C04	Neoplastic Process	0.35	1	2005	2015	1	0	CTD_human
1938	EEF2	0.599	0.731	C0027627	Neoplasm Metastasis	phenotype	C23;C04	Neoplastic Process	0.3	1	2010	2010	1	0	CTD_human
1956	EGFR	0.295	0.885	C0027627	Neoplasm Metastasis	phenotype	C23;C04	Neoplastic Process	0.4	0.973	1988	2020	3	0	CTD_human
1974	EIF4A2	0.604	0.731	C0027627	Neoplasm Metastasis	phenotype	C23;C04	Neoplastic Process	0.33	1	2007	2019	1	0	CTD_human
3320	HSP90AA1	0.411	0.923	C0027627	Neoplasm Metastasis	phenotype	C23;C04	Neoplastic Process	0.4	1	2004	2020	1	0	CTD_human
3479	IGF1	0.318	0.885	C0027627	Neoplasm Metastasis	phenotype	C23;C04	Neoplastic Process	0.4	1	1997	2019	1	0	CTD_human
3688	ITGB1	0.496	0.808	C0027627	Neoplasm Metastasis	phenotype	C23;C04	Neoplastic Process	0.4	1	2003	2019	1	0	CTD_human
3732	CD82	0.507	0.731	C0027627	Neoplasm Metastasis	phenotype	C23;C04	Neoplastic Process	0.6	0.973	1995	2019	1	0	CTD_human
3845	KRAS	0.32	0.923	C0027627	Neoplasm Metastasis	phenotype	C23;C04	Neoplastic Process	0.4	0.952	1991	2020	1	0	CTD_human
4638	MYLK	0.51	0.846	C0027627	Neoplasm Metastasis	phenotype	C23;C04	Neoplastic Process	0.35	1	2003	2019	2	0	CTD_human
4830	NME1	0.443	0.808	C0027627	Neoplasm Metastasis	phenotype	C23;C04	Neoplastic Process	0.4	0.94	1989	2020	1	0	CTD_human
4969	OGN	0.631	0.577	C0027627	Neoplasm Metastasis	phenotype	C23;C04	Neoplastic Process	0.31	1	2007	2014	1	0	CTD_human
5328	PLAU	0.425	0.923	C0027627	Neoplasm Metastasis	phenotype	C23;C04	Neoplastic Process	0.4	0.981	1990	2019	1	0	CTD_human
5329	PLAUR	0.536	0.731	C0027627	Neoplasm Metastasis	phenotype	C23;C04	Neoplastic Process	0.4	1	1998	2017	1	0	CTD_human
5478	PPIA	0.51	0.769	C0027627	Neoplasm Metastasis	phenotype	C23;C04	Neoplastic Process	0.35	1	2011	2019	1	0	CTD_human
5594	MAPK1	0.33	0.923	C0027627	Neoplasm Metastasis	phenotype	C23;C04	Neoplastic Process	0.4	0.991	2003	2020	1	0	CTD_human
5595	MAPK3	0.379	0.885	C0027627	Neoplasm Metastasis	phenotype	C23;C04	Neoplastic Process	0.4	1	1998	2020	1	0	CTD_human
5819	NECTIN2	0.575	0.769	C0027627	Neoplasm Metastasis	phenotype	C23;C04	Neoplastic Process	0.32	1	2018	2019	1	0	CTD_human
5829	PXN	0.547	0.654	C0027627	Neoplasm Metastasis	phenotype	C23;C04	Neoplastic Process	0.4	1	1996	2019	1	0	CTD_human
5879	RAC1	0.429	0.962	C0027627	Neoplasm Metastasis	phenotype	C23;C04	Neoplastic Process	0.4	0.985	2001	2020	1	0	CTD_human
6197	RPS6KA3	0.491	0.846	C0027627	Neoplasm Metastasis	phenotype	C23;C04	Neoplastic Process	0.4	0.909	2010	2019	1	0	CTD_human
6275	S100A4	0.448	0.769	C0027627	Neoplasm Metastasis	phenotype	C23;C04	Neoplastic Process	0.4	0.962	1992	2020	2	0	CTD_human
6387	CXCL12	0.379	0.846	C0027627	Neoplasm Metastasis	phenotype	C23;C04	Neoplastic Process	0.4	0.995	2000	2020	2	0	CTD_human
6426	SRSF1	0.563	0.692	C0027627	Neoplasm Metastasis	phenotype	C23;C04	Neoplastic Process	0.32	1	2005	2013	1	0	CTD_human
6696	SPP1	0.353	0.885	C0027627	Neoplasm Metastasis	phenotype	C23;C04	Neoplastic Process	0.4	0.989	1996	2020	1	0	CTD_human
6772	STAT1	0.399	0.885	C0027627	Neoplasm Metastasis	phenotype	C23;C04	Neoplastic Process	0.39	1	2012	2019	1	0	CTD_human
6774	STAT3	0.32	0.923	C0027627	Neoplasm Metastasis	phenotype	C23;C04	Neoplastic Process	0.4	0.996	2001	2020	2	0	CTD_human
7048	TGFBR2	0.413	0.846	C0027627	Neoplasm Metastasis	phenotype	C23;C04	Neoplastic Process	0.4	1	2001	2019	1	0	CTD_human
7157	TP53	0.236	0.962	C0027627	Neoplasm Metastasis	phenotype	C23;C04	Neoplastic Process	0.6	0.936	1991	2020	1	0	CTD_human
7295	TXN	0.447	0.885	C0027627	Neoplasm Metastasis	phenotype	C23;C04	Neoplastic Process	0.39	1	2008	2018	1	0	CTD_human
7430	EZR	0.476	0.808	C0027627	Neoplasm Metastasis	phenotype	C23;C04	Neoplastic Process	0.4	0.975	1999	2020	1	0	CTD_human
7531	YWHAE	0.53	0.692	C0027627	Neoplasm Metastasis	phenotype	C23;C04	Neoplastic Process	0.34	1	2007	2018	1	0	CTD_human
7913	DEK	0.542	0.769	C0027627	Neoplasm Metastasis	phenotype	C23;C04	Neoplastic Process	0.33	1	2016	2019	1	0	CTD_human
8654	PDE5A	0.513	0.731	C0027627	Neoplasm Metastasis	phenotype	C23;C04	Neoplastic Process	0.32	1	2003	2018	1	0	CTD_human
10397	NDRG1	0.488	0.731	C0027627	Neoplasm Metastasis	phenotype	C23;C04	Neoplastic Process	0.4	1	2003	2020	2	0	CTD_human
23411	SIRT1	0.378	0.885	C0027627	Neoplasm Metastasis	phenotype	C23;C04	Neoplastic Process	0.4	1	2011	2019	1	0	CTD_human
27436	EML4	0.569	0.577	C0027627	Neoplasm Metastasis	phenotype	C23;C04	Neoplastic Process	0.33	1	2012	2019	2	0	CTD_human
51129	ANGPTL4	0.498	0.731	C0027627	Neoplasm Metastasis	phenotype	C23;C04	Neoplastic Process	0.4	0.958	2006	2019	1	0	CTD_human
