# Supplementary material for: Comparative Proteomics Analysis of Exosomes Identifies Key Pathways and Protein Markers Related to Breast Cancer Metastasis
Source: Int J Mol Sci. 2023 Feb 17;24(4):4033. doi: 10.3390/ijms24044033 (PMC9967130; doi:10.3390/ijms24044033)
Supplement: Supplementary file 1 [file ijms-24-04033-s001.zip › Table S4 Altered Proteins.xlsx]

## Sheet: Table S4
Table S4	List of proteins with significant changes among the five cell lines (i.e., altered proteins).
ProteinAC	ProteinID	Protein Name	Peptide #	p-value	Protein ratio				Protein ratio (Log2)
					116/EpH	1424/EpH	1424.1/EpH	1424.2/EpH	116/EpH	1424/EpH	1424.1/EpH	1424.2/EpH
P56203	CATW_MOUSE	Cathepsin W OS=Mus musculus GN=Ctsw PE=2 SV=2	9	4.94075e-16	2.92521	0.50501	0.541713	0.178182	1.54854	-0.985616	-0.8844	-2.48857
P06869	UROK_MOUSE	Urokinase-type plasminogen activator OS=Mus musculus GN=Plau PE=1 SV=1	18	1.5331e-12	0.409227	2.04621	1.23366	1.43171	-1.28903	1.03295	0.302948	0.517743
Q9Z1P8	ANGL4_MOUSE	Angiopoietin-related protein 4 OS=Mus musculus GN=Angptl4 PE=2 SV=1	4	3.53472e-11	0.271469	0.263852	0.320061	0.260212	-1.88114	-1.9222	-1.64358	-1.94224
Q922J3	CLIP1_MOUSE	CAP-Gly domain-containing linker protein 1 OS=Mus musculus GN=Clip1 PE=1 SV=1	2	6.66595e-11	2.53836	5.2682	23.0909	20.0388	1.3439	2.39731	4.52925	4.32472
P10107	ANXA1_MOUSE	Annexin A1 OS=Mus musculus GN=Anxa1 PE=1 SV=2	14	7.49136e-11	0.81074	1.45226	1.02052	1.94892	-0.30269	0.538304	0.0293	0.962675
Q99JZ0	SDCB2_MOUSE	Syntenin-2 OS=Mus musculus GN=Sdcbp2 PE=2 SV=1	8	8.17897e-11	0.673189	1.76227	1.05076	1.20275	-0.570917	0.817432	0.0714377	0.266336
Q9EQP2	EHD4_MOUSE	EH domain-containing protein 4 OS=Mus musculus GN=Ehd4 PE=1 SV=1	22	8.64007e-11	0.42957	0.796429	0.54473	0.838994	-1.21903	-0.328382	-0.876387	-0.253268
Q8R366	IGSF8_MOUSE	Immunoglobulin superfamily member 8 OS=Mus musculus GN=Igsf8 PE=1 SV=2	11	9.77112e-11	0.520811	0.372614	0.321967	0.404883	-0.941169	-1.42425	-1.63502	-1.30442
P62281	RS11_MOUSE	40S ribosomal protein S11 OS=Mus musculus GN=Rps11 PE=2 SV=3	8	1.13532e-10	0.667933	0.840778	0.816756	1.34385	-0.582224	-0.250203	-0.292022	0.426377
Q9WVK4	EHD1_MOUSE	EH domain-containing protein 1 OS=Mus musculus GN=Ehd1 PE=1 SV=1	16	1.81661e-10	0.430181	0.704499	0.475834	0.710445	-1.21698	-0.505331	-1.07147	-0.493205
P14148	RL7_MOUSE	60S ribosomal protein L7 OS=Mus musculus GN=Rpl7 PE=2 SV=2	6	2.91421e-10	0.583494	0.936908	0.686284	1.63531	-0.77721	-0.0940212	-0.543122	0.70956
P62702	RS4X_MOUSE	40S ribosomal protein S4, X isoform OS=Mus musculus GN=Rps4x PE=2 SV=2	11	6.03099e-10	0.690149	0.956925	0.797047	1.56351	-0.53502	-0.0635229	-0.327264	0.644784
Q9CZX8	RS19_MOUSE	40S ribosomal protein S19 OS=Mus musculus GN=Rps19 PE=1 SV=3	3	7.70832e-10	0.187224	0.33801	0.276717	0.515014	-2.41716	-1.56486	-1.85352	-0.957315
P62918	RL8_MOUSE	60S ribosomal protein L8 OS=Mus musculus GN=Rpl8 PE=2 SV=2	3	1.19542e-09	0.496045	0.537148	0.408064	1.54524	-1.01146	-0.896609	-1.29313	0.627829
Q8K182	CO8A_MOUSE	Complement component C8 alpha chain OS=Mus musculus GN=C8a PE=2 SV=1	2	1.22694e-09	0.347578	0.186842	0.200188	0.133004	-1.52459	-2.42011	-2.32057	-2.91046
P67871	CSK2B_MOUSE	Casein kinase II subunit beta OS=Mus musculus GN=Csnk2b PE=1 SV=1	3	1.24338e-09	1.14593	1.73163	1.20041	2.7447	0.196519	0.792134	0.263531	1.45665
P47911	RL6_MOUSE	60S ribosomal protein L6 OS=Mus musculus GN=Rpl6 PE=1 SV=3	9	1.291e-09	0.6935	1.12707	0.870837	1.63276	-0.528033	0.172578	-0.199526	0.707314
Q9JMI7	TX101_MOUSE	Testis-expressed sequence 101 protein OS=Mus musculus GN=Tex101 PE=1 SV=1	3	1.82874e-09	0.104768	0.163065	0.16763	0.292813	-3.25473	-2.61648	-2.57665	-1.77195
Q61581	IBP7_MOUSE	Insulin-like growth factor-binding protein 7 OS=Mus musculus GN=Igfbp7 PE=2 SV=3	11	2.48437e-09	0.516158	0.322923	0.297964	0.237116	-0.954114	-1.63074	-1.74679	-2.07634
Q9CPR4	RL17_MOUSE	60S ribosomal protein L17 OS=Mus musculus GN=Rpl17 PE=2 SV=3	3	2.5386e-09	0.565964	0.855666	0.737489	1.343	-0.821217	-0.22488	-0.439306	0.425464
P35980	RL18_MOUSE	60S ribosomal protein L18 OS=Mus musculus GN=Rpl18 PE=2 SV=3	3	2.88576e-09	0.547662	0.825013	0.692051	1.52786	-0.868643	-0.277511	-0.531049	0.61151
Q99P72	RTN4_MOUSE	Reticulon-4 OS=Mus musculus GN=Rtn4 PE=1 SV=2	7	2.98763e-09	0.947365	1.93793	1.78989	2.56338	-0.0780071	0.954516	0.839873	1.35805
Q8BHL4	RAI3_MOUSE	Retinoic acid-induced protein 3 OS=Mus musculus GN=Gprc5a PE=2 SV=1	8	3.32808e-09	0.254028	0.432587	0.28116	0.350747	-1.97694	-1.20894	-1.83054	-1.5115
Q03145	EPHA2_MOUSE	Ephrin type-A receptor 2 OS=Mus musculus GN=Epha2 PE=1 SV=3	28	3.9032e-09	0.490999	1.0669	0.625306	1.13131	-1.02621	0.0934275	-0.677365	0.177992
P62855	RS26_MOUSE	40S ribosomal protein S26 OS=Mus musculus GN=Rps26 PE=2 SV=3	3	4.85634e-09	0.664882	0.833541	0.719333	1.29065	-0.588831	-0.262674	-0.475269	0.368103
P01900	HA12_MOUSE	H-2 class I histocompatibility antigen, D-D alpha chain OS=Mus musculus GN=H2-D1 PE=1 SV=1	5	5.39508e-09	0.590738	0.906451	0.770435	1.23096	-0.759411	-0.1417	-0.376254	0.299786
P97430	SLPI_MOUSE	Antileukoproteinase OS=Mus musculus GN=Slpi PE=2 SV=1	8	6.2946e-09	0.521852	0.0966575	0.0974782	0.0959599	-0.938287	-3.37097	-3.35878	-3.38142
P21956	MFGM_MOUSE	Lactadherin OS=Mus musculus GN=Mfge8 PE=1 SV=3	21	8.32766e-09	1.04494	1.62331	0.755768	1.50935	0.0634217	0.698942	-0.403985	0.593923
P11370	ENV2_MOUSE	Retrovirus-related Env polyprotein from Fv-4 locus OS=Mus musculus GN=Fv4 PE=1 SV=2	12	8.35007e-09	0.580699	0.535438	0.391405	2.12535	-0.784138	-0.901209	-1.35326	1.0877
O70514	FGFP1_MOUSE	Fibroblast growth factor-binding protein 1 OS=Mus musculus GN=Fgfbp1 PE=1 SV=1	3	8.476e-09	0.358251	0.287631	0.230403	0.339233	-1.48096	-1.79771	-2.11777	-1.55965
P37889	FBLN2_MOUSE	Fibulin-2 OS=Mus musculus GN=Fbln2 PE=1 SV=2	30	8.79149e-09	0.710701	0.583743	0.659175	0.481645	-0.492685	-0.776594	-0.601267	-1.05396
P19253	RL13A_MOUSE	60S ribosomal protein L13a OS=Mus musculus GN=Rpl13a PE=1 SV=4	3	1.5158e-08	0.534962	0.817544	0.647308	1.58804	-0.902492	-0.290631	-0.627475	0.667246
Q9D5K4	S1PBP_MOUSE	S100P-binding protein OS=Mus musculus GN=S100pbp PE=2 SV=1	2	1.52677e-08	1.88555	4.2061	8.90214	8.90637	0.914985	2.07248	3.15415	3.15484
Q6P5F7	TTYH3_MOUSE	Protein tweety homolog 3 OS=Mus musculus GN=Ttyh3 PE=1 SV=1	2	2.02549e-08	0.468116	0.459339	0.399467	0.277712	-1.09506	-1.12237	-1.32385	-1.84834
P62242	RS8_MOUSE	40S ribosomal protein S8 OS=Mus musculus GN=Rps8 PE=1 SV=2	7	2.98684e-08	0.616746	0.931519	0.735985	1.44512	-0.697251	-0.102343	-0.442251	0.531188
Q8R2Q8	BST2_MOUSE	Bone marrow stromal antigen 2 OS=Mus musculus GN=Bst2 PE=1 SV=1	3	3.25516e-08	0.444815	0.736996	0.613881	1.12616	-1.16872	-0.440272	-0.703968	0.171405
O88551	CLD1_MOUSE	Claudin-1 OS=Mus musculus GN=Cldn1 PE=1 SV=1	2	3.30824e-08	2.53337	3.59199	2.54601	3.74487	1.34106	1.84478	1.34824	1.90491
Q5FWI3	TMEM2_MOUSE	Transmembrane protein 2 OS=Mus musculus GN=Tmem2 PE=1 SV=1	8	3.3858e-08	0.528193	0.690452	0.676019	0.7608	-0.920862	-0.534387	-0.564865	-0.39441
Q6ZWU9	RS27_MOUSE	40S ribosomal protein S27 OS=Mus musculus GN=Rps27 PE=1 SV=3	2	3.48766e-08	0.501233	0.719463	0.601098	1.00619	-0.996446	-0.475008	-0.734328	0.00890154
Q91VW5	GOGA4_MOUSE	Golgin subfamily A member 4 OS=Mus musculus GN=Golga4 PE=1 SV=2	4	4.12617e-08	0.489554	0.675127	0.420422	0.730514	-1.03046	-0.56677	-1.25009	-0.453016
Q9WTL2	RAB25_MOUSE	Ras-related protein Rab-25 OS=Mus musculus GN=Rab25 PE=1 SV=2	2	4.50771e-08	0.344891	0.680561	0.410925	0.696933	-1.53579	-0.555204	-1.28305	-0.520908
P97436	NKX31_MOUSE	Homeobox protein Nkx-3.1 OS=Mus musculus GN=Nkx3-1 PE=1 SV=1	2	4.58523e-08	2.50123	4.87368	16.5082	21.2141	1.32264	2.28501	4.04511	4.40695
P98063	BMP1_MOUSE	Bone morphogenetic protein 1 OS=Mus musculus GN=Bmp1 PE=1 SV=2	23	6.41248e-08	1.53834	1.45216	1.42021	1.11738	0.621378	0.538202	0.506106	0.160119
Q3THW5	H2AV_MOUSE	Histone H2A.V OS=Mus musculus GN=H2afv PE=1 SV=3	2	7.0471e-08	0.377577	0.720749	0.469765	1.72547	-1.40516	-0.472431	-1.08999	0.786988
Q9WV91	FPRP_MOUSE	Prostaglandin F2 receptor negative regulator OS=Mus musculus GN=Ptgfrn PE=1 SV=2	29	7.55135e-08	0.489618	0.674608	0.555326	0.65859	-1.03027	-0.567878	-0.848594	-0.602548
Q60949	TBCD1_MOUSE	TBC1 domain family member 1 OS=Mus musculus GN=Tbc1d1 PE=1 SV=3	2	7.93627e-08	2.64135	7.82963	34.4261	33.9422	1.40128	2.96894	5.10543	5.08501
P40240	CD9_MOUSE	CD9 antigen OS=Mus musculus GN=Cd9 PE=1 SV=2	8	1.15255e-07	0.402325	0.680986	0.457085	0.666352	-1.31357	-0.554303	-1.12947	-0.585644
Q8BP67	RL24_MOUSE	60S ribosomal protein L24 OS=Mus musculus GN=Rpl24 PE=2 SV=2	4	1.16286e-07	0.543617	0.633872	0.613015	1.05096	-0.879337	-0.657737	-0.706006	0.0717065
P62267	RS23_MOUSE	40S ribosomal protein S23 OS=Mus musculus GN=Rps23 PE=2 SV=3	3	1.23215e-07	0.641704	0.852966	0.684585	1.15776	-0.64002	-0.22944	-0.546698	0.211336
P48036	ANXA5_MOUSE	Annexin A5 OS=Mus musculus GN=Anxa5 PE=1 SV=1	10	1.27446e-07	1.00994	1.37158	1.25032	1.88213	0.0142632	0.455835	0.322298	0.912364
O09167	RL21_MOUSE	60S ribosomal protein L21 OS=Mus musculus GN=Rpl21 PE=2 SV=3	2	1.56285e-07	0.616844	0.789459	0.643714	1.27441	-0.697022	-0.341063	-0.635509	0.34983
P35441	TSP1_MOUSE	Thrombospondin-1 OS=Mus musculus GN=Thbs1 PE=1 SV=1	73	1.58425e-07	0.617576	0.515388	0.533662	0.48428	-0.695312	-0.956269	-0.906001	-1.04609
P62806	H4_MOUSE	Histone H4 OS=Mus musculus GN=Hist1h4a PE=1 SV=2	7	1.65693e-07	0.601007	1.18811	0.851439	3.21789	-0.734546	0.248668	-0.232025	1.68611
P17225	PTBP1_MOUSE	Polypyrimidine tract-binding protein 1 OS=Mus musculus GN=Ptbp1 PE=1 SV=2	4	1.78891e-07	2.76987	13.8398	62.2904	32.604	1.46982	3.79075	5.96094	5.02698
Q3UUY6	PROM2_MOUSE	Prominin-2 OS=Mus musculus GN=Prom2 PE=1 SV=1	10	1.81318e-07	0.554368	0.872404	0.712958	0.720713	-0.851084	-0.196932	-0.488111	-0.472503
Q8BMF4	ODP2_MOUSE	Dihydrolipoyllysine-residue acetyltransferase component of pyruvate dehydrogenase complex, mitochondrial OS=Mus musculus GN=Dlat PE=1 SV=2	2	1.84e-07	0.459781	0.532548	1.78609	1.46486	-1.12098	-0.909015	0.836806	0.550761
Q69ZN7	MYOF_MOUSE	Myoferlin OS=Mus musculus GN=Myof PE=1 SV=2	51	1.96826e-07	1.06021	1.40907	1.20531	1.50207	0.084349	0.49474	0.269399	0.586952
P43276	H15_MOUSE	Histone H1.5 OS=Mus musculus GN=Hist1h1b PE=1 SV=2	6	2.02152e-07	0.197135	0.224395	0.282848	0.454496	-2.34274	-2.15589	-1.8219	-1.13766
Q04998	INHBA_MOUSE	Inhibin beta A chain OS=Mus musculus GN=Inhba PE=1 SV=1	5	2.2353e-07	1.75684	1.03046	0.977403	0.643032	0.812981	0.0432895	-0.0329746	-0.637037
Q924C6	LOXL4_MOUSE	Lysyl oxidase homolog 4 OS=Mus musculus GN=Loxl4 PE=2 SV=2	26	2.41846e-07	0.614823	0.553639	0.52602	0.49768	-0.701756	-0.852981	-0.926809	-1.00671
P63037	DNJA1_MOUSE	DnaJ homolog subfamily A member 1 OS=Mus musculus GN=Dnaja1 PE=1 SV=1	7	2.51295e-07	0.639308	1.04433	0.831089	1.04476	-0.645417	0.0625774	-0.266925	0.0631713
P12970	RL7A_MOUSE	60S ribosomal protein L7a OS=Mus musculus GN=Rpl7a PE=2 SV=2	12	2.64352e-07	0.652001	0.771153	0.738043	1.1702	-0.617053	-0.374911	-0.438223	0.226752
P10922	H10_MOUSE	Histone H1.0 OS=Mus musculus GN=H1f0 PE=2 SV=4	2	2.69018e-07	0.0268705	0.0565263	0.077214	0.124346	-5.21783	-4.14493	-3.69499	-3.00756
P99027	RLA2_MOUSE	60S acidic ribosomal protein P2 OS=Mus musculus GN=Rplp2 PE=1 SV=3	5	2.89307e-07	0.713539	0.657237	0.638833	0.837654	-0.486935	-0.605515	-0.646488	-0.255574
P84228	H32_MOUSE	Histone H3.2 OS=Mus musculus GN=Hist1h3b PE=1 SV=2	9	3.26746e-07	0.583267	1.12891	0.799389	3.28248	-0.777771	0.174933	-0.32303	1.71479
Q64700	RBL2_MOUSE	Retinoblastoma-like protein 2 OS=Mus musculus GN=Rbl2 PE=1 SV=3	2	3.33038e-07	0.766842	0.616453	0.505402	0.517653	-0.382999	-0.697937	-0.984495	-0.949944
Q9CZM2	RL15_MOUSE	60S ribosomal protein L15 OS=Mus musculus GN=Rpl15 PE=2 SV=4	4	3.5105e-07	0.592191	0.857234	0.66738	1.41858	-0.755865	-0.22224	-0.58342	0.504446
Q99MV1	TDRD1_MOUSE	Tudor domain-containing protein 1 OS=Mus musculus GN=Tdrd1 PE=1 SV=2	2	3.54048e-07	1.72264	2.58144	4.34607	4.6698	0.784619	1.36818	2.11971	2.22336
P62751	RL23A_MOUSE	60S ribosomal protein L23a OS=Mus musculus GN=Rpl23a PE=1 SV=1	3	3.92185e-07	0.321994	0.455795	0.553553	0.805064	-1.63489	-1.13354	-0.853205	-0.312825
Q64277	BST1_MOUSE	ADP-ribosyl cyclase 2 OS=Mus musculus GN=Bst1 PE=1 SV=1	9	4.06081e-07	0.491273	0.533245	0.426257	0.452271	-1.0254	-0.90713	-1.2302	-1.14474
P39876	TIMP3_MOUSE	Metalloproteinase inhibitor 3 OS=Mus musculus GN=Timp3 PE=2 SV=1	4	4.75364e-07	1.0915	0.51734	0.499762	0.399443	0.126312	-0.950816	-1.00069	-1.32394
Q60737	CSK21_MOUSE	Casein kinase II subunit alpha OS=Mus musculus GN=Csnk2a1 PE=1 SV=2	3	4.94288e-07	1.47398	2.65761	1.7447	4.16823	0.559717	1.41013	0.802975	2.05943
Q8CFE6	S38A2_MOUSE	Sodium-coupled neutral amino acid transporter 2 OS=Mus musculus GN=Slc38a2 PE=1 SV=1	4	5.03613e-07	0.602826	0.732903	0.378103	0.600119	-0.730185	-0.448307	-1.40315	-0.73668
P60335	PCBP1_MOUSE	Poly(rC)-binding protein 1 OS=Mus musculus GN=Pcbp1 PE=1 SV=1	4	5.29886e-07	0.666269	0.88475	0.770594	0.974032	-0.585823	-0.176658	-0.375956	-0.0379593
Q69ZA1	CDK13_MOUSE	Cyclin-dependent kinase 13 OS=Mus musculus GN=Cdk13 PE=1 SV=3	3	5.42435e-07	0.805101	0.651831	0.686408	0.504392	-0.312758	-0.617431	-0.542861	-0.987383
P28231	CXB3_MOUSE	Gap junction beta-3 protein OS=Mus musculus GN=Gjb3 PE=1 SV=1	4	5.63257e-07	0.748413	1.9057	0.708087	0.784038	-0.418093	0.930318	-0.498002	-0.351005
Q9WTR5	CAD13_MOUSE	Cadherin-13 OS=Mus musculus GN=Cdh13 PE=1 SV=2	4	5.78247e-07	1.17353	1.69512	1.73982	2.50979	0.230856	0.761384	0.798939	1.32757
Q9R0B9	PLOD2_MOUSE	Procollagen-lysine,2-oxoglutarate 5-dioxygenase 2 OS=Mus musculus GN=Plod2 PE=2 SV=2	9	5.91016e-07	0.549358	0.568501	0.651561	0.543902	-0.864183	-0.814765	-0.618029	-0.878581
Q9CXW4	RL11_MOUSE	60S ribosomal protein L11 OS=Mus musculus GN=Rpl11 PE=1 SV=4	2	6.02455e-07	0.661945	0.971719	0.808713	1.34324	-0.595216	-0.0413889	-0.3063	0.425722
Q8C0Z1	ITFG3_MOUSE	Protein ITFG3 OS=Mus musculus GN=Itfg3 PE=1 SV=1	2	6.50122e-07	0.654162	0.488779	0.405211	0.554372	-0.612281	-1.03275	-1.30325	-0.851074
Q8CI19	PDGFC_MOUSE	Platelet-derived growth factor C OS=Mus musculus GN=Pdgfc PE=1 SV=2	10	6.63991e-07	0.665957	0.517722	0.499715	0.652322	-0.5865	-0.949752	-1.00082	-0.616343
Q6ZWV7	RL35_MOUSE	60S ribosomal protein L35 OS=Mus musculus GN=Rpl35 PE=2 SV=1	2	7.4951e-07	0.298729	0.381716	0.286891	0.919091	-1.74309	-1.38943	-1.80143	-0.121721
O09118	NET1_MOUSE	Netrin-1 OS=Mus musculus GN=Ntn1 PE=1 SV=3	4	7.72259e-07	0.344134	0.247345	0.258707	0.329496	-1.53896	-2.0154	-1.95061	-1.60167
P51912	AAAT_MOUSE	Neutral amino acid transporter B(0) OS=Mus musculus GN=Slc1a5 PE=2 SV=2	4	9.96996e-07	0.443946	0.87451	0.536297	0.730653	-1.17154	-0.193453	-0.898896	-0.452742
P84104	SRSF3_MOUSE	Serine/arginine-rich splicing factor 3 OS=Mus musculus GN=Srsf3 PE=1 SV=1	2	1.00041e-06	1.50297	0.846351	0.662344	0.774641	0.587816	-0.240672	-0.594348	-0.3684
P53986	MOT1_MOUSE	Monocarboxylate transporter 1 OS=Mus musculus GN=Slc16a1 PE=1 SV=1	4	1.00996e-06	0.614743	1.06548	0.656956	1.23924	-0.701945	0.0915077	-0.606131	0.309451
Q64475	H2B1B_MOUSE	Histone H2B type 1-B OS=Mus musculus GN=Hist1h2bb PE=1 SV=3	7	1.10327e-06	0.525292	1.12922	0.799445	2.97519	-0.928808	0.175323	-0.322929	1.57298
P35456	UPAR_MOUSE	Urokinase plasminogen activator surface receptor OS=Mus musculus GN=Plaur PE=1 SV=1	2	1.16404e-06	0.857818	1.24396	0.872022	1.56491	-0.221256	0.314941	-0.197563	0.646083
Q8QZY6	TSN14_MOUSE	Tetraspanin-14 OS=Mus musculus GN=Tspan14 PE=1 SV=1	5	1.2321e-06	0.594597	0.823666	0.607194	0.575731	-0.750017	-0.279869	-0.719769	-0.796533
P60521	GBRL2_MOUSE	Gamma-aminobutyric acid receptor-associated protein-like 2 OS=Mus musculus GN=Gabarapl2 PE=1 SV=1	2	1.41686e-06	1.01848	1.67726	1.07078	1.41066	0.0264181	0.746107	0.0986612	0.496374
Q91XI1	DUS3L_MOUSE	tRNA-dihydrouridine(47) synthase [NAD(P)(+)]-like OS=Mus musculus GN=Dus3l PE=2 SV=1	4	1.42087e-06	1.0322	1.13129	2.1031	2.33747	0.0457172	0.17797	1.07252	1.22495
Q8BJU2	TSN9_MOUSE	Tetraspanin-9 OS=Mus musculus GN=Tspan9 PE=1 SV=1	3	1.45057e-06	0.483323	0.673067	0.575427	0.565746	-1.04894	-0.571177	-0.797296	-0.821773
Q640L5	CCD18_MOUSE	Coiled-coil domain-containing protein 18 OS=Mus musculus GN=Ccdc18 PE=2 SV=1	2	1.50628e-06	0.928744	3.02198	7.38164	8.56214	-0.106647	1.59549	2.88394	3.09797
Q9D8E6	RL4_MOUSE	60S ribosomal protein L4 OS=Mus musculus GN=Rpl4 PE=1 SV=3	12	1.51474e-06	0.712703	1.07719	0.926777	1.52279	-0.488628	0.107274	-0.109706	0.606721
O35566	CD151_MOUSE	CD151 antigen OS=Mus musculus GN=Cd151 PE=2 SV=2	4	1.69654e-06	0.561525	0.735081	0.494539	0.739506	-0.832577	-0.444024	-1.01584	-0.435367
Q62470	ITA3_MOUSE	Integrin alpha-3 OS=Mus musculus GN=Itga3 PE=1 SV=1	19	1.78621e-06	0.547237	0.988847	0.697512	1.09517	-0.869763	-0.0161801	-0.51971	0.131154
P62830	RL23_MOUSE	60S ribosomal protein L23 OS=Mus musculus GN=Rpl23 PE=1 SV=1	3	1.87724e-06	0.535026	0.730443	0.565022	1.09473	-0.902318	-0.453157	-0.82362	0.130573
P07356	ANXA2_MOUSE	Annexin A2 OS=Mus musculus GN=Anxa2 PE=1 SV=2	18	1.98835e-06	0.663389	0.881892	0.751439	1.5894	-0.592074	-0.181326	-0.412273	0.668485
Q9WUL7	ARL3_MOUSE	ADP-ribosylation factor-like protein 3 OS=Mus musculus GN=Arl3 PE=1 SV=1	3	2.01713e-06	0.667086	0.947641	0.806565	0.712667	-0.584054	-0.0775876	-0.310137	-0.4887
Q61207	SAP_MOUSE	Sulfated glycoprotein 1 OS=Mus musculus GN=Psap PE=1 SV=2	2	2.0306e-06	2.10137	2.0593	1.47517	3.54423	1.07133	1.04215	0.560885	1.82547
A2CG49	KALRN_MOUSE	Kalirin OS=Mus musculus GN=Kalrn PE=1 SV=1	5	2.4617e-06	1.65701	4.08029	12.3605	5.91748	0.728585	2.02867	3.62766	2.56498
P54116	STOM_MOUSE	Erythrocyte band 7 integral membrane protein OS=Mus musculus GN=Stom PE=1 SV=3	5	2.46951e-06	1.06343	1.53417	1.24917	1.65842	0.0887304	0.617455	0.320971	0.729811
Q62283	TSN7_MOUSE	Tetraspanin-7 OS=Mus musculus GN=Tspan7 PE=2 SV=2	3	2.5968e-06	0.408046	0.414928	0.396094	0.570999	-1.2932	-1.26907	-1.33608	-0.80844
Q02105	C1QC_MOUSE	Complement C1q subcomponent subunit C OS=Mus musculus GN=C1qc PE=2 SV=2	2	2.74662e-06	0.791036	0.634023	0.679728	0.544666	-0.338185	-0.657393	-0.55697	-0.876557
Q61805	LBP_MOUSE	Lipopolysaccharide-binding protein OS=Mus musculus GN=Lbp PE=2 SV=2	9	2.76022e-06	1.39698	0.573174	0.467945	0.504285	0.48231	-0.802955	-1.09559	-0.987689
P09055	ITB1_MOUSE	Integrin beta-1 OS=Mus musculus GN=Itgb1 PE=1 SV=1	28	2.94867e-06	0.654895	1.0032	0.799238	1.20013	-0.610664	0.00461346	-0.323302	0.263186
Q9QZF2	GPC1_MOUSE	Glypican-1 OS=Mus musculus GN=Gpc1 PE=1 SV=1	20	3.21474e-06	1.14917	1.44849	1.1275	2.4709	0.200592	0.534546	0.173128	1.30503
Q8CG16	C1RA_MOUSE	Complement C1r-A subcomponent OS=Mus musculus GN=C1ra PE=1 SV=1	9	3.35486e-06	0.780821	0.63047	0.651594	0.585234	-0.356936	-0.6655	-0.617955	-0.772913
Q9Z183	PADI4_MOUSE	Protein-arginine deiminase type-4 OS=Mus musculus GN=Padi4 PE=2 SV=3	5	3.37497e-06	0.958804	1.27143	1.73562	2.14742	-0.0606917	0.346447	0.79545	1.10261
Q9CXF0	KYNU_MOUSE	Kynureninase OS=Mus musculus GN=Kynu PE=2 SV=3	5	3.74905e-06	0.609999	1.01811	0.817607	2.20097	-0.713122	0.0259002	-0.290521	1.13814
Q9D2G2	ODO2_MOUSE	Dihydrolipoyllysine-residue succinyltransferase component of 2-oxoglutarate dehydrogenase complex, mitochondrial OS=Mus musculus GN=Dlst PE=1 SV=1	2	3.86273e-06	0.271029	0.581572	1.01469	0.885983	-1.88348	-0.781971	0.0210445	-0.17465
Q6EDY6	LR16A_MOUSE	Leucine-rich repeat-containing protein 16A OS=Mus musculus GN=Lrrc16a PE=1 SV=2	2	3.86865e-06	2.78068	5.88121	25.0458	11.3484	1.47544	2.55611	4.6465	3.50441
P08122	CO4A2_MOUSE	Collagen alpha-2(IV) chain OS=Mus musculus GN=Col4a2 PE=2 SV=4	2	3.9501e-06	1.11736	1.39428	3.27325	3.87205	0.160092	0.479522	1.71072	1.9531
P47915	RL29_MOUSE	60S ribosomal protein L29 OS=Mus musculus GN=Rpl29 PE=2 SV=2	2	4.06559e-06	0.307664	0.567824	0.386097	1.10534	-1.70057	-0.816484	-1.37296	0.144493
O88844	IDHC_MOUSE	Isocitrate dehydrogenase [NADP] cytoplasmic OS=Mus musculus GN=Idh1 PE=1 SV=2	10	4.79027e-06	1.6262	0.963795	1.04627	0.955472	0.701507	-0.0532011	0.0652521	-0.065715
P01887	B2MG_MOUSE	Beta-2-microglobulin OS=Mus musculus GN=B2m PE=1 SV=2	3	4.90834e-06	5.47627	9.1098	3.40704	3.5747	2.45319	3.18742	1.76852	1.83782
Q8BGV3	TACD2_MOUSE	Tumor-associated calcium signal transducer 2 OS=Mus musculus GN=Tacstd2 PE=2 SV=1	12	5.03354e-06	0.78253	0.752911	0.63203	0.665748	-0.353783	-0.409448	-0.661936	-0.586952
Q9Z0L8	GGH_MOUSE	Gamma-glutamyl hydrolase OS=Mus musculus GN=Ggh PE=1 SV=2	5	5.21596e-06	1.66147	1.13998	1.28682	1.07115	0.732461	0.189002	0.363815	0.0991667
Q6P5D8	SMHD1_MOUSE	Structural maintenance of chromosomes flexible hinge domain-containing protein 1 OS=Mus musculus GN=Smchd1 PE=1 SV=2	2	5.39574e-06	0.914485	1.73707	2.33415	2.61923	-0.128969	0.796657	1.2229	1.38914
Q99KN1	ARRD1_MOUSE	Arrestin domain-containing protein 1 OS=Mus musculus GN=Arrdc1 PE=2 SV=2	9	5.57834e-06	0.460961	0.845703	0.740646	0.805536	-1.11728	-0.241777	-0.433144	-0.31198
P20033	PDGFA_MOUSE	Platelet-derived growth factor subunit A OS=Mus musculus GN=Pdgfa PE=2 SV=2	3	5.59686e-06	0.506438	0.351132	0.39303	0.354006	-0.981543	-1.50992	-1.34729	-1.49816
P25911	LYN_MOUSE	Tyrosine-protein kinase Lyn OS=Mus musculus GN=Lyn PE=1 SV=4	2	5.62024e-06	1.09797	2.2406	1.61048	1.7957	0.134845	1.16388	0.687488	0.844548
P58242	ASM3B_MOUSE	Acid sphingomyelinase-like phosphodiesterase 3b OS=Mus musculus GN=Smpdl3b PE=1 SV=1	7	5.83695e-06	0.686827	0.689623	0.595195	0.649362	-0.541982	-0.536121	-0.748566	-0.622906
P50518	VATE1_MOUSE	V-type proton ATPase subunit E 1 OS=Mus musculus GN=Atp6v1e1 PE=1 SV=2	6	6.63511e-06	1.25918	1.09124	1.29166	1.62331	0.332487	0.125971	0.369225	0.698939
P63024	VAMP3_MOUSE	Vesicle-associated membrane protein 3 OS=Mus musculus GN=Vamp3 PE=1 SV=1	2	6.76111e-06	0.757626	1.11281	1.34522	1.51696	-0.400442	0.154202	0.42784	0.601179
P08752	GNAI2_MOUSE	Guanine nucleotide-binding protein G(i) subunit alpha-2 OS=Mus musculus GN=Gnai2 PE=1 SV=5	7	6.97946e-06	0.960672	1.25689	0.896685	1.60398	-0.0578835	0.329855	-0.157327	0.681659
Q9EQF5	DPYS_MOUSE	Dihydropyrimidinase OS=Mus musculus GN=Dpys PE=2 SV=2	2	7.26165e-06	0.852291	1.29731	0.91227	1.51337	-0.230582	0.375527	-0.132468	0.59776
P17095	HMGA1_MOUSE	High mobility group protein HMG-I/HMG-Y OS=Mus musculus GN=Hmga1 PE=1 SV=4	2	7.86042e-06	2.04959	0.756602	0.611335	0.860439	1.03534	-0.402394	-0.709965	-0.216855
Q9D180	CFA57_MOUSE	Cilia- and flagella-associated protein 57 OS=Mus musculus GN=Cfap57 PE=2 SV=3	2	7.96389e-06	0.554711	1.06991	0.784639	2.63934	-0.850193	0.097488	-0.3499	1.40018
P14069	S10A6_MOUSE	Protein S100-A6 OS=Mus musculus GN=S100a6 PE=1 SV=3	2	7.98276e-06	0.858905	1.57546	1.27202	2.10168	-0.21943	0.655777	0.347118	1.07154
Q05816	FABP5_MOUSE	Fatty acid-binding protein, epidermal OS=Mus musculus GN=Fabp5 PE=1 SV=3	5	8.44238e-06	0.264558	0.370361	0.300535	0.462968	-1.91834	-1.433	-1.73439	-1.11102
Q8R143	PTTG_MOUSE	Pituitary tumor-transforming gene 1 protein-interacting protein OS=Mus musculus GN=Pttg1ip PE=1 SV=1	3	8.80493e-06	1.13498	1.46769	1.06296	1.69131	0.182666	0.553547	0.0880845	0.758137
P70348	GCM1_MOUSE	Chorion-specific transcription factor GCMa OS=Mus musculus GN=Gcm1 PE=1 SV=1	2	9.11992e-06	0.795042	0.616972	0.612585	0.483399	-0.330896	-0.696724	-0.707018	-1.04871
Q9WU03	SPIT2_MOUSE	Kunitz-type protease inhibitor 2 OS=Mus musculus GN=Spint2 PE=2 SV=1	2	9.22925e-06	1.03938	1.80955	0.84668	1.93633	0.0557177	0.85563	-0.240112	0.953325
P23242	CXA1_MOUSE	Gap junction alpha-1 protein OS=Mus musculus GN=Gja1 PE=1 SV=2	9	9.46715e-06	0.547278	0.860087	0.461689	0.599344	-0.869654	-0.217445	-1.11501	-0.738544
Q9JMC3	DNJA4_MOUSE	DnaJ homolog subfamily A member 4 OS=Mus musculus GN=Dnaja4 PE=2 SV=1	2	9.58509e-06	1.78326	1.47629	2.47958	3.82848	0.834517	0.561972	1.3101	1.93677
P29416	HEXA_MOUSE	Beta-hexosaminidase subunit alpha OS=Mus musculus GN=Hexa PE=2 SV=2	5	1.00758e-05	2.98886	1.44705	1.30627	1.20877	1.5796	0.533113	0.385457	0.273534
O54819	TFPI1_MOUSE	Tissue factor pathway inhibitor OS=Mus musculus GN=Tfpi PE=2 SV=1	2	1.04975e-05	0.552404	0.248878	0.406853	0.52251	-0.856203	-2.00649	-1.29742	-0.93647
P34884	MIF_MOUSE	Macrophage migration inhibitory factor OS=Mus musculus GN=Mif PE=1 SV=2	2	1.08986e-05	0.50331	0.686695	0.51312	0.697984	-0.990482	-0.542258	-0.962632	-0.518734
Q9ER00	STX12_MOUSE	Syntaxin-12 OS=Mus musculus GN=Stx12 PE=1 SV=1	2	1.1412e-05	0.701897	1.65736	1.60984	2.02084	-0.510668	0.728889	0.686915	1.01496
P10923	OSTP_MOUSE	Osteopontin OS=Mus musculus GN=Spp1 PE=1 SV=1	6	1.3134e-05	1.6548	1.55072	0.787133	1.34068	0.726656	0.632934	-0.34532	0.422964
O35316	SC6A6_MOUSE	Sodium- and chloride-dependent taurine transporter OS=Mus musculus GN=Slc6a6 PE=1 SV=2	4	1.38733e-05	0.712858	0.613809	0.763107	1.24742	-0.488314	-0.704138	-0.390042	0.318952
P14131	RS16_MOUSE	40S ribosomal protein S16 OS=Mus musculus GN=Rps16 PE=2 SV=4	4	1.48671e-05	0.643093	0.969864	0.925205	1.37871	-0.636901	-0.044145	-0.112155	0.463317
Q80W68	KIRR1_MOUSE	Kin of IRRE-like protein 1 OS=Mus musculus GN=Kirrel PE=1 SV=1	9	1.54732e-05	0.636352	0.67146	0.618348	0.71884	-0.652104	-0.574627	-0.693509	-0.476257
P43274	H14_MOUSE	Histone H1.4 OS=Mus musculus GN=Hist1h1e PE=1 SV=2	2	1.58189e-05	0.553949	0.710708	0.68151	0.921551	-0.852174	-0.492671	-0.553194	-0.117864
Q8R1V4	TMED4_MOUSE	Transmembrane emp24 domain-containing protein 4 OS=Mus musculus GN=Tmed4 PE=2 SV=1	2	1.5899e-05	1.8898	2.06114	3.84086	4.59521	0.918233	1.04344	1.94143	2.20013
Q8R205	ZC3HA_MOUSE	Zinc finger CCCH domain-containing protein 10 OS=Mus musculus GN=Zc3h10 PE=2 SV=1	3	1.61959e-05	0.608786	0.519519	0.529552	0.48036	-0.715993	-0.944751	-0.917154	-1.05781
Q6L8S8	B4GN3_MOUSE	Beta-1,4-N-acetylgalactosaminyltransferase 3 OS=Mus musculus GN=B4galnt3 PE=2 SV=1	6	1.68265e-05	0.518551	0.505133	0.467187	0.476856	-0.947441	-0.985265	-1.09793	-1.06837
Q91XQ0	DYH8_MOUSE	Dynein heavy chain 8, axonemal OS=Mus musculus GN=Dnahc8 PE=2 SV=2	3	1.84328e-05	1.37179	1.78967	4.1793	5.45653	0.45606	0.839691	2.06326	2.44798
Q61990	PCBP2_MOUSE	Poly(rC)-binding protein 2 OS=Mus musculus GN=Pcbp2 PE=1 SV=1	3	2.08376e-05	0.666267	1.00457	0.770416	1.20408	-0.585828	0.00657998	-0.376291	0.267933
Q02013	AQP1_MOUSE	Aquaporin-1 OS=Mus musculus GN=Aqp1 PE=1 SV=3	2	2.13426e-05	0.349208	0.293002	0.290013	0.442247	-1.51784	-1.77102	-1.78581	-1.17708
P17515	CXL10_MOUSE	C-X-C motif chemokine 10 OS=Mus musculus GN=Cxcl10 PE=1 SV=1	2	2.3273e-05	0.285453	0.260383	0.151166	0.224385	-1.80867	-1.94129	-2.7258	-2.15595
Q05793	PGBM_MOUSE	Basement membrane-specific heparan sulfate proteoglycan core protein OS=Mus musculus GN=Hspg2 PE=1 SV=1	111	2.50687e-05	0.708032	0.661595	0.612705	0.609489	-0.498114	-0.59598	-0.706736	-0.714328
P20352	TF_MOUSE	Tissue factor OS=Mus musculus GN=F3 PE=1 SV=2	3	2.54373e-05	0.945963	1.44354	1.50567	1.3302	-0.0801436	0.529608	0.590407	0.411642
Q5NCE8	MRS2_MOUSE	Magnesium transporter MRS2 homolog, mitochondrial OS=Mus musculus GN=Mrs2 PE=2 SV=2	2	2.69806e-05	1.04912	3.5065	17.247	8.92918	0.0691824	1.81003	4.10828	3.15853
P08249	MDHM_MOUSE	Malate dehydrogenase, mitochondrial OS=Mus musculus GN=Mdh2 PE=1 SV=3	3	2.89403e-05	0.515803	0.414487	0.372868	0.374969	-0.955109	-1.2706	-1.42326	-1.41516
P18828	SDC1_MOUSE	Syndecan-1 OS=Mus musculus GN=Sdc1 PE=1 SV=1	3	3.02617e-05	0.53413	0.856335	0.425902	0.867757	-0.904738	-0.223753	-1.23141	-0.204637
P63158	HMGB1_MOUSE	High mobility group protein B1 OS=Mus musculus GN=Hmgb1 PE=1 SV=2	13	3.10311e-05	1.98027	0.986217	1.31065	1.52582	0.985697	-0.0200229	0.390284	0.609581
P08226	APOE_MOUSE	Apolipoprotein E OS=Mus musculus GN=Apoe PE=1 SV=2	3	3.1993e-05	0.766533	0.726187	0.726552	0.614803	-0.38358	-0.461588	-0.460862	-0.701803
Q8C0Q9	RPGF5_MOUSE	Rap guanine nucleotide exchange factor 5 OS=Mus musculus GN=Rapgef5 PE=2 SV=2	1	3.23605e-05	11.3796	76.6407	237.397	208.729	3.50838	6.26004	7.89115	7.70549
Q61092	LAMC2_MOUSE	Laminin subunit gamma-2 OS=Mus musculus GN=Lamc2 PE=1 SV=2	33	3.67283e-05	0.488434	0.680899	0.707389	0.974165	-1.03377	-0.554487	-0.499425	-0.0377613
P32507	PVRL2_MOUSE	Poliovirus receptor-related protein 2 OS=Mus musculus GN=Pvrl2 PE=1 SV=2	2	3.72429e-05	0.700216	0.683918	0.530302	0.744118	-0.514128	-0.548105	-0.915114	-0.426397
Q99J93	IFM2_MOUSE	Interferon-induced transmembrane protein 2 OS=Mus musculus GN=Ifitm2 PE=1 SV=1	2	3.84782e-05	0.641933	0.96784	0.709568	0.795516	-0.639505	-0.0471592	-0.494988	-0.330037
P62852	RS25_MOUSE	40S ribosomal protein S25 OS=Mus musculus GN=Rps25 PE=2 SV=1	3	4.02128e-05	0.45441	0.69161	0.494008	1.04142	-1.13793	-0.531969	-1.01739	0.0585472
Q91WQ3	SYYC_MOUSE	Tyrosine--tRNA ligase, cytoplasmic OS=Mus musculus GN=Yars PE=2 SV=3	3	4.20997e-05	1.38209	1.38585	1.78449	1.44419	0.466852	0.470772	0.83551	0.530264
P10639	THIO_MOUSE	Thioredoxin OS=Mus musculus GN=Txn PE=1 SV=3	4	4.34367e-05	0.547059	0.89787	0.606542	1.18982	-0.870231	-0.155422	-0.721321	0.250743
P62754	RS6_MOUSE	40S ribosomal protein S6 OS=Mus musculus GN=Rps6 PE=1 SV=1	5	4.41945e-05	0.554635	0.739543	0.619039	1.32493	-0.85039	-0.435294	-0.691899	0.405913
Q8BV57	SRCRL_MOUSE	Soluble scavenger receptor cysteine-rich domain-containing protein SSC5D OS=Mus musculus GN=Ssc5d PE=1 SV=1	2	4.54071e-05	0.260871	0.207751	0.230864	0.153164	-1.93859	-2.26707	-2.11489	-2.70685
P63325	RS10_MOUSE	40S ribosomal protein S10 OS=Mus musculus GN=Rps10 PE=1 SV=1	4	4.69369e-05	0.39444	0.573229	0.496862	0.781059	-1.34212	-0.802816	-1.00908	-0.356496
P35979	RL12_MOUSE	60S ribosomal protein L12 OS=Mus musculus GN=Rpl12 PE=1 SV=2	3	4.81528e-05	0.658342	0.995515	0.738669	1.20098	-0.60309	-0.00648525	-0.437	0.264211
P63321	RALA_MOUSE	Ras-related protein Ral-A OS=Mus musculus GN=Rala PE=1 SV=1	2	4.88546e-05	0.740099	1.03745	0.603132	1.06839	-0.43421	0.0530426	-0.729455	0.0954423
Q9CZU6	CISY_MOUSE	Citrate synthase, mitochondrial OS=Mus musculus GN=Cs PE=1 SV=1	3	5.27748e-05	0.941918	0.599563	0.806053	0.722792	-0.0863269	-0.738018	-0.311053	-0.468347
Q91VK4	ITM2C_MOUSE	Integral membrane protein 2C OS=Mus musculus GN=Itm2c PE=1 SV=2	2	5.45269e-05	1.03397	1.80963	1.19257	2.04599	0.0481904	0.855697	0.254075	1.0328
Q9QY06	MYO9B_MOUSE	Unconventional myosin-IXb OS=Mus musculus GN=Myo9b PE=1 SV=2	4	5.80471e-05	0.881158	1.1108	1.51079	1.44104	-0.182527	0.151595	0.595301	0.527109
P28047	WNT7B_MOUSE	Protein Wnt-7b OS=Mus musculus GN=Wnt7b PE=1 SV=1	7	5.84435e-05	0.715444	0.780533	0.701925	0.496851	-0.48309	-0.357469	-0.510611	-1.00911
Q8VDR9	DOCK6_MOUSE	Dedicator of cytokinesis protein 6 OS=Mus musculus GN=Dock6 PE=1 SV=4	3	5.93453e-05	0.905763	0.962738	2.33082	2.43168	-0.142794	-0.0547849	1.22084	1.28195
Q01853	TERA_MOUSE	Transitional endoplasmic reticulum ATPase OS=Mus musculus GN=Vcp PE=1 SV=4	30	7.24064e-05	1.34339	1.50398	1.4381	1.7787	0.42588	0.588786	0.524162	0.830822
Q9JJI8	RL38_MOUSE	60S ribosomal protein L38 OS=Mus musculus GN=Rpl38 PE=2 SV=3	2	7.68749e-05	0.204646	0.491976	0.317413	0.489418	-2.2888	-1.02334	-1.65557	-1.03086
P10400	POL1_MOUSE	Retrovirus-related Pol polyprotein (Fragment) OS=Mus musculus GN=Pol PE=2 SV=1	2	7.69058e-05	0.394284	0.630917	0.700628	0.989051	-1.34269	-0.664479	-0.51328	-0.0158826
Q64523	H2A2C_MOUSE	Histone H2A type 2-C OS=Mus musculus GN=Hist2h2ac PE=1 SV=3	2	7.80005e-05	0.66497	1.14184	0.960824	2.8671	-0.588639	0.191358	-0.057656	1.51959
P0CW03	LY6C2_MOUSE	Lymphocyte antigen 6C2 OS=Mus musculus GN=Ly6c2 PE=1 SV=1	2	7.81875e-05	0.366954	0.69553	1.07353	0.480679	-1.44633	-0.523815	0.102363	-1.05685
P49443	PPM1A_MOUSE	Protein phosphatase 1A OS=Mus musculus GN=Ppm1a PE=1 SV=1	2	7.82025e-05	0.782887	0.627496	0.744195	0.576508	-0.353125	-0.672322	-0.426247	-0.794587
Q9JKA5	GPA33_MOUSE	Cell surface A33 antigen OS=Mus musculus GN=Gpa33 PE=2 SV=2	5	8.26515e-05	0.516933	2.43259	1.64847	1.59736	-0.951951	1.28249	0.721124	0.675689
Q5M8M2	ODF3B_MOUSE	Outer dense fiber protein 3B OS=Mus musculus GN=Odf3b PE=2 SV=1	2	8.59585e-05	1.81244	4.96418	18.6644	14.2211	0.85793	2.31155	4.22221	3.82996
Q61490	CD166_MOUSE	CD166 antigen OS=Mus musculus GN=Alcam PE=1 SV=3	2	0.000105244	1.17126	1.23359	1.31425	1.55358	0.228064	0.302861	0.394241	0.635592
Q64674	SPEE_MOUSE	Spermidine synthase OS=Mus musculus GN=Srm PE=2 SV=1	3	0.000109063	0.92564	1.34678	1.47265	1.6146	-0.111477	0.42951	0.558419	0.691175
P51942	MATN1_MOUSE	Cartilage matrix protein OS=Mus musculus GN=Matn1 PE=2 SV=2	2	0.000121564	0.780866	0.831893	0.792646	0.638545	-0.356853	-0.26553	-0.335251	-0.647139
Q8VHB5	CAH9_MOUSE	Carbonic anhydrase 9 OS=Mus musculus GN=Ca9 PE=2 SV=2	2	0.000137561	0.18198	0.423688	0.539004	0.480687	-2.45815	-1.23893	-0.891633	-1.05683
P32883	RASK_MOUSE	GTPase KRas OS=Mus musculus GN=Kras PE=1 SV=1	2	0.000159777	0.548224	0.643933	0.510298	0.555331	-0.867162	-0.635017	-0.970589	-0.84858
P43277	H13_MOUSE	Histone H1.3 OS=Mus musculus GN=Hist1h1d PE=1 SV=2	2	0.000164272	0.3659	0.519781	0.511868	0.730777	-1.45048	-0.944024	-0.966157	-0.452496
Q9D819	IPYR_MOUSE	Inorganic pyrophosphatase OS=Mus musculus GN=Ppa1 PE=1 SV=1	5	0.000164377	0.875468	1.13707	1.68077	1.56785	-0.191873	0.185319	0.749122	0.64879
Q9Z0Y2	PA21B_MOUSE	Phospholipase A2 OS=Mus musculus GN=Pla2g1b PE=2 SV=1	4	0.000164988	0.70812	0.730093	0.613435	0.685489	-0.497934	-0.453847	-0.705017	-0.544794
Q923D5	WBP11_MOUSE	WW domain-binding protein 11 OS=Mus musculus GN=Wbp11 PE=1 SV=2	5	0.000170528	1.18101	1.30086	2.2069	3.19239	0.240018	0.379466	1.14202	1.67464
Q9JJ00	PLS1_MOUSE	Phospholipid scramblase 1 OS=Mus musculus GN=Plscr1 PE=2 SV=1	5	0.000177831	0.703515	0.717521	0.587677	0.752741	-0.507347	-0.478906	-0.766905	-0.409775
Q8C166	CPNE1_MOUSE	Copine-1 OS=Mus musculus GN=Cpne1 PE=1 SV=1	2	0.000206018	0.935381	1.22456	1.13933	1.63573	-0.0963739	0.292266	0.188188	0.709939
Q80W00	PP1RA_MOUSE	Serine/threonine-protein phosphatase 1 regulatory subunit 10 OS=Mus musculus GN=Ppp1r10 PE=1 SV=1	8	0.000209831	0.810357	0.721913	0.749506	0.63801	-0.303371	-0.470102	-0.415989	-0.648349
P28867	KPCD_MOUSE	Protein kinase C delta type OS=Mus musculus GN=Prkcd PE=1 SV=3	2	0.000211989	1.05556	0.916324	0.855032	0.599697	0.0780032	-0.12607	-0.225949	-0.737693
Q9CX00	IST1_MOUSE	IST1 homolog OS=Mus musculus GN=Ist1 PE=2 SV=1	7	0.000233225	0.86968	0.832098	0.52377	0.9077	-0.201444	-0.265174	-0.932995	-0.139712
Q9QUI0	RHOA_MOUSE	Transforming protein RhoA OS=Mus musculus GN=Rhoa PE=1 SV=1	4	0.000270022	0.754931	0.856291	0.648203	0.919487	-0.405583	-0.223826	-0.625482	-0.121099
Q8CBR6	TSK_MOUSE	Tsukushin OS=Mus musculus GN=Tsku PE=2 SV=2	4	0.000277381	1.21176	0.847551	0.887427	0.599051	0.277103	-0.238629	-0.172299	-0.739249
Q9R1Q9	VAS1_MOUSE	V-type proton ATPase subunit S1 OS=Mus musculus GN=Atp6ap1 PE=1 SV=1	3	0.00030324	3.65057	3.06344	2.16097	1.93029	1.86812	1.61515	1.11168	0.948816
Q8C088	EGFEM_MOUSE	EGF-like and EMI domain-containing protein 1 OS=Mus musculus GN=Egfem1 PE=2 SV=1	4	0.00031631	0.882456	0.564758	0.744343	0.708487	-0.180404	-0.824296	-0.425961	-0.497186
Q91YQ5	RPN1_MOUSE	Dolichyl-diphosphooligosaccharide--protein glycosyltransferase subunit 1 OS=Mus musculus GN=Rpn1 PE=2 SV=1	2	0.000340361	0.978078	2.66834	2.55729	4.72561	-0.0319786	1.41594	1.35462	2.2405
P52795	EFNB1_MOUSE	Ephrin-B1 OS=Mus musculus GN=Efnb1 PE=1 SV=1	2	0.000348644	2.26987	2.66637	1.72916	1.43758	1.18261	1.41488	0.790075	0.52364
Q9QZM4	TR10B_MOUSE	Tumor necrosis factor receptor superfamily member 10B OS=Mus musculus GN=Tnfrsf10b PE=2 SV=3	2	0.000353288	0.301958	0.670289	0.448876	0.649675	-1.72758	-0.577146	-1.15561	-0.622209
O88544	CSN4_MOUSE	COP9 signalosome complex subunit 4 OS=Mus musculus GN=Cops4 PE=1 SV=1	3	0.000392567	1.16052	1.1433	1.50426	1.28535	0.214766	0.193198	0.589055	0.362161
Q9D273	MMAB_MOUSE	Cob(I)yrinic acid a,c-diamide adenosyltransferase, mitochondrial OS=Mus musculus GN=Mmab PE=2 SV=1	2	0.000406316	0.977992	1.11654	1.59173	1.22021	-0.0321055	0.159034	0.670598	0.287128
P50228	CXCL5_MOUSE	C-X-C motif chemokine 5 OS=Mus musculus GN=Cxcl5 PE=1 SV=2	3	0.000412608	1.18569	0.612067	0.560949	0.470088	0.245722	-0.708239	-0.83406	-1.089
Q9WVC3	CAV2_MOUSE	Caveolin-2 OS=Mus musculus GN=Cav2 PE=1 SV=1	2	0.000413459	1.05785	1.66543	1.10346	2.17413	0.0811368	0.735897	0.142031	1.12044
Q99LX0	PARK7_MOUSE	Protein DJ-1 OS=Mus musculus GN=Park7 PE=1 SV=1	2	0.000440967	0.550438	1.20006	0.850746	0.94838	-0.861347	0.263111	-0.2332	-0.0764621
Q61468	MSLN_MOUSE	Mesothelin OS=Mus musculus GN=Msln PE=1 SV=1	6	0.000441253	0.708324	0.576802	0.501001	0.876788	-0.497519	-0.793852	-0.997114	-0.189701
Q9DC51	GNAI3_MOUSE	Guanine nucleotide-binding protein G(k) subunit alpha OS=Mus musculus GN=Gnai3 PE=1 SV=3	4	0.000443093	0.655568	0.923481	0.664078	1.00102	-0.609182	-0.114846	-0.590576	0.00146556
P07091	S10A4_MOUSE	Protein S100-A4 OS=Mus musculus GN=S100a4 PE=1 SV=1	3	0.000448528	0.492231	0.747823	0.431084	0.684942	-1.02259	-0.41923	-1.21396	-0.545946
Q09143	CTR1_MOUSE	High affinity cationic amino acid transporter 1 OS=Mus musculus GN=Slc7a1 PE=2 SV=1	4	0.000452801	0.732135	0.936437	0.561998	1.31213	-0.449818	-0.0947461	-0.831362	0.391912
P54728	RD23B_MOUSE	UV excision repair protein RAD23 homolog B OS=Mus musculus GN=Rad23b PE=1 SV=2	2	0.000462332	0.733646	1.51378	1.23377	1.74274	-0.446845	0.598156	0.303075	0.801354
Q80X71	T106B_MOUSE	Transmembrane protein 106B OS=Mus musculus GN=Tmem106b PE=2 SV=1	2	0.000466737	1.33207	1.82404	1.00083	1.56805	0.413674	0.867135	0.00119768	0.648968
P62301	RS13_MOUSE	40S ribosomal protein S13 OS=Mus musculus GN=Rps13 PE=1 SV=2	6	0.000485765	0.803242	0.955395	0.619969	1.26617	-0.316093	-0.0658306	-0.689731	0.340475
Q8R4W6	PCOC2_MOUSE	Procollagen C-endopeptidase enhancer 2 OS=Mus musculus GN=Pcolce2 PE=2 SV=2	7	0.000531271	0.481437	0.533082	0.628585	0.607421	-1.05458	-0.90757	-0.669819	-0.71923
Q91WG5	AAKG2_MOUSE	5'-AMP-activated protein kinase subunit gamma-2 OS=Mus musculus GN=Prkag2 PE=1 SV=2	3	0.000580312	0.561075	0.350712	0.534971	0.609369	-0.833734	-1.51164	-0.902466	-0.714612
Q9DCS1	T176A_MOUSE	Transmembrane protein 176A OS=Mus musculus GN=Tmem176a PE=2 SV=2	2	0.000617279	1.043	0.876231	0.47309	0.532095	0.0607393	-0.190617	-1.07981	-0.910245
Q6P5F6	S39AA_MOUSE	Zinc transporter ZIP10 OS=Mus musculus GN=Slc39a10 PE=1 SV=1	3	0.000651663	0.55923	0.753518	0.712487	0.852959	-0.838486	-0.408286	-0.489065	-0.229451
P08207	S10AA_MOUSE	Protein S100-A10 OS=Mus musculus GN=S100a10 PE=2 SV=2	3	0.000665677	0.724774	1.17746	2.15819	1.93177	-0.464397	0.235683	1.10982	0.949925
P11276	FINC_MOUSE	Fibronectin OS=Mus musculus GN=Fn1 PE=1 SV=4	92	0.00066731	0.676759	0.336409	0.496525	0.603628	-0.563285	-1.57171	-1.01006	-0.728267
O88990	ACTN3_MOUSE	Alpha-actinin-3 OS=Mus musculus GN=Actn3 PE=2 SV=1	3	0.000678587	0.669417	0.893966	0.701188	1.17903	-0.579024	-0.161708	-0.512127	0.237599
P06797	CATL1_MOUSE	Cathepsin L1 OS=Mus musculus GN=Ctsl1 PE=1 SV=2	6	0.00067946	1.14518	1.21566	1.03698	1.54215	0.195569	0.281743	0.052389	0.624947
P47941	CRKL_MOUSE	Crk-like protein OS=Mus musculus GN=Crkl PE=1 SV=2	3	0.000685363	1.14285	1.22555	1.68941	1.24573	0.192641	0.293435	0.756516	0.316992
P42859	HD_MOUSE	Huntingtin OS=Mus musculus GN=Htt PE=1 SV=2	4	0.000695248	0.619193	0.855349	0.735475	1.40419	-0.691539	-0.225415	-0.443251	0.489735
P26369	U2AF2_MOUSE	Splicing factor U2AF 65 kDa subunit OS=Mus musculus GN=U2af2 PE=1 SV=3	2	0.000697456	1.11662	0.514749	0.64903	0.724299	0.159141	-0.95806	-0.623643	-0.465342
P49817	CAV1_MOUSE	Caveolin-1 OS=Mus musculus GN=Cav1 PE=1 SV=1	2	0.000815906	1.08072	1.21549	1.08073	1.54883	0.111999	0.281537	0.112004	0.631178
Q9DCK3	TSN4_MOUSE	Tetraspanin-4 OS=Mus musculus GN=Tspan4 PE=2 SV=1	3	0.00100217	0.609863	0.799895	0.608244	0.598982	-0.713442	-0.322118	-0.717277	-0.739415
Q62468	VILI_MOUSE	Villin-1 OS=Mus musculus GN=Vil1 PE=1 SV=3	4	0.00111175	1.62194	1.25926	2.20665	2.07044	0.697721	0.332582	1.14186	1.04994
Q62448	IF4G2_MOUSE	Eukaryotic translation initiation factor 4 gamma 2 OS=Mus musculus GN=Eif4g2 PE=1 SV=2	2	0.00112561	1.1359	1.07974	1.13718	1.50606	0.18384	0.110689	0.185458	0.590784
Q9QZC7	PKHB2_MOUSE	Pleckstrin homology domain-containing family B member 2 OS=Mus musculus GN=Plekhb2 PE=1 SV=1	2	0.00112578	0.373013	0.640243	0.440293	0.780594	-1.4227	-0.64331	-1.18346	-0.357355
Q9QUM9	PSA6_MOUSE	Proteasome subunit alpha type-6 OS=Mus musculus GN=Psma6 PE=1 SV=1	3	0.00123217	1.47649	1.49256	1.75221	1.54548	0.562167	0.577789	0.809177	0.628052
O70258	SGCE_MOUSE	Epsilon-sarcoglycan OS=Mus musculus GN=Sgce PE=2 SV=2	5	0.00124558	1.26405	1.22537	1.06606	1.58924	0.338055	0.293223	0.0922859	0.668336
Q9Z0S7	CLD9_MOUSE	Claudin-9 OS=Mus musculus GN=Cldn9 PE=2 SV=2	3	0.00124726	0.723491	0.773804	0.619003	0.92969	-0.466954	-0.36996	-0.691982	-0.105178
Q9QWI6	SRCN1_MOUSE	SRC kinase signaling inhibitor 1 OS=Mus musculus GN=Srcin1 PE=1 SV=2	3	0.0012903	1.54008	1.11139	1.08507	0.795967	0.623007	0.152361	0.117794	-0.329219
Q8BWZ3	NAA25_MOUSE	N-alpha-acetyltransferase 25, NatB auxiliary subunit OS=Mus musculus GN=Naa25 PE=1 SV=1	5	0.00132499	1.22412	1.11129	0.908063	1.64679	0.291745	0.15224	-0.139136	0.719655
P11157	RIR2_MOUSE	Ribonucleoside-diphosphate reductase subunit M2 OS=Mus musculus GN=Rrm2 PE=1 SV=1	1	0.00144941	0.603558	2.27128	0.718431	2.49376	-0.728436	1.18351	-0.477078	1.31832
Q7TPD1	FBX11_MOUSE	F-box only protein 11 OS=Mus musculus GN=Fbxo11 PE=2 SV=2	3	0.00146997	0.845432	0.672237	0.630876	0.581091	-0.242239	-0.572959	-0.664571	-0.783165
Q80UE6	WNK4_MOUSE	Serine/threonine-protein kinase WNK4 OS=Mus musculus GN=Wnk4 PE=1 SV=1	1	0.00147027	0.0142134	0.0869319	0.0221132	0.178504	-6.1366	-3.52397	-5.49895	-2.48597
P01902	HA1D_MOUSE	H-2 class I histocompatibility antigen, K-D alpha chain OS=Mus musculus GN=H2-K1 PE=1 SV=1	11	0.00149103	0.638431	0.791488	0.775115	0.77543	-0.647397	-0.33736	-0.367518	-0.366932
Q9CYN9	RENR_MOUSE	Renin receptor OS=Mus musculus GN=Atp6ap2 PE=2 SV=2	8	0.00158768	1.3246	1.54411	1.16461	1.28841	0.405561	0.626773	0.219846	0.365591
A2AJA9	CI172_MOUSE	Uncharacterized protein C9orf172 homolog OS=Mus musculus GN=Gm996 PE=1 SV=1	5	0.00163472	1.26199	1.31875	1.47127	1.70451	0.335696	0.399175	0.557059	0.769353
Q04736	YES_MOUSE	Tyrosine-protein kinase Yes OS=Mus musculus GN=Yes1 PE=1 SV=3	3	0.00168994	0.548784	0.725061	0.480317	0.687542	-0.86569	-0.463826	-1.05794	-0.54048
P54923	ADPRH_MOUSE	[Protein ADP-ribosylarginine] hydrolase OS=Mus musculus GN=Adprh PE=2 SV=1	2	0.00179898	0.629881	0.503384	0.449405	0.543359	-0.666849	-0.99027	-1.15391	-0.880022
Q61188	EZH2_MOUSE	Histone-lysine N-methyltransferase EZH2 OS=Mus musculus GN=Ezh2 PE=1 SV=2	2	0.00179971	0.876156	0.645611	0.667294	0.458743	-0.190741	-0.631263	-0.583607	-1.12424
P12023	A4_MOUSE	Amyloid beta A4 protein OS=Mus musculus GN=App PE=1 SV=3	3	0.00187036	1.01361	1.51009	1.40345	1.6466	0.0194968	0.594634	0.488982	0.719492
Q8BFQ4	WDR82_MOUSE	WD repeat-containing protein 82 OS=Mus musculus GN=Wdr82 PE=1 SV=1	2	0.00191521	0.984288	1.52182	1.32345	1.58147	-0.022848	0.605795	0.404303	0.661263
P40224	SDF1_MOUSE	Stromal cell-derived factor 1 OS=Mus musculus GN=Cxcl12 PE=2 SV=2	2	0.00200557	1.17121	1.2528	1.45191	1.55997	0.228002	0.325161	0.537955	0.641516
Q8K1L5	PP1RB_MOUSE	Protein phosphatase 1 regulatory subunit 11 OS=Mus musculus GN=Ppp1r11 PE=1 SV=1	3	0.00211222	0.698969	0.78187	0.590063	0.842174	-0.516701	-0.354999	-0.761059	-0.247809
Q6KAU4	MB12B_MOUSE	Multivesicular body subunit 12B OS=Mus musculus GN=Mvb12b PE=2 SV=2	3	0.00228238	0.844913	0.734886	0.675738	0.633337	-0.243126	-0.444408	-0.565464	-0.658954
P10810	CD14_MOUSE	Monocyte differentiation antigen CD14 OS=Mus musculus GN=Cd14 PE=1 SV=1	5	0.00233106	0.761709	0.713062	0.65881	1.1052	-0.392688	-0.487902	-0.602065	0.144301
Q66PY1	SCUB3_MOUSE	Signal peptide, CUB and EGF-like domain-containing protein 3 OS=Mus musculus GN=Scube3 PE=1 SV=1	3	0.00233495	0.71572	0.592134	0.674186	0.645531	-0.482534	-0.756005	-0.568782	-0.631442
Q8VDQ9	KRI1_MOUSE	Protein KRI1 homolog OS=Mus musculus GN=Kri1 PE=1 SV=2	2	0.00243182	1.03353	0.353638	0.718694	0.633349	0.0475792	-1.49965	-0.476551	-0.658927
Q61009	SCRB1_MOUSE	Scavenger receptor class B member 1 OS=Mus musculus GN=Scarb1 PE=1 SV=1	2	0.00251286	1.18448	1.70448	1.38478	8.14953	0.244251	0.76933	0.46966	3.02672
O70318	E41L2_MOUSE	Band 4.1-like protein 2 OS=Mus musculus GN=Epb41l2 PE=1 SV=2	10	0.00260196	0.797079	0.644563	0.724968	0.745327	-0.327205	-0.633606	-0.46401	-0.424055
Q8VDV0	ITGBL_MOUSE	Integrin beta-like protein 1 OS=Mus musculus GN=Itgbl1 PE=2 SV=2	5	0.00261854	1.68292	1.2042	1.57709	0.892426	0.750963	0.268077	0.657267	-0.164195
P61514	RL37A_MOUSE	60S ribosomal protein L37a OS=Mus musculus GN=Rpl37a PE=2 SV=2	2	0.00262263	0.425809	0.594538	1.86361	1.57252	-1.23172	-0.75016	0.898103	0.653075
P56400	GP1BB_MOUSE	Platelet glycoprotein Ib beta chain OS=Mus musculus GN=Gp1bb PE=1 SV=1	1	0.00262324	0.899431	1.56419	0.878188	1.80071	-0.152916	0.645415	-0.187398	0.848568
Q9JKB3	YBOX3_MOUSE	Y-box-binding protein 3 OS=Mus musculus GN=Ybx3 PE=1 SV=2	4	0.00267706	0.938404	1.18622	1.84624	3.10709	-0.0917193	0.246369	0.884591	1.63557
P61028	RAB8B_MOUSE	Ras-related protein Rab-8B OS=Mus musculus GN=Rab8b PE=1 SV=1	2	0.00270361	0.892526	0.9351	0.578843	0.914073	-0.164034	-0.0968073	-0.788757	-0.129619
Q9JI78	NGLY1_MOUSE	Peptide-N(4)-(N-acetyl-beta-glucosaminyl)asparagine amidase OS=Mus musculus GN=Ngly1 PE=1 SV=2	2	0.00272878	0.787329	0.62022	0.658222	0.805555	-0.344961	-0.689149	-0.603354	-0.311945
O88393	TGBR3_MOUSE	Transforming growth factor beta receptor type 3 OS=Mus musculus GN=Tgfbr3 PE=1 SV=1	3	0.0030849	1.65669	1.39409	1.6957	1.34804	0.728305	0.479329	0.761877	0.43086
P35288	RAB23_MOUSE	Ras-related protein Rab-23 OS=Mus musculus GN=Rab23 PE=1 SV=2	2	0.00333875	0.946451	1.00002	0.628008	1.3401	-0.0794009	2.51599e-05	-0.671145	0.422338
Q3TCN2	PLBL2_MOUSE	Putative phospholipase B-like 2 OS=Mus musculus GN=Plbd2 PE=1 SV=2	2	0.00335018	1.62861	1.38845	2.2884	3.77907	0.703638	0.473478	1.19434	1.91803
P0C6F1	DYH2_MOUSE	Dynein heavy chain 2, axonemal OS=Mus musculus GN=Dnah2 PE=2 SV=1	4	0.00362718	1.44554	1.18081	1.17051	1.571	0.531607	0.239777	0.227138	0.651682
P61079	UB2D3_MOUSE	Ubiquitin-conjugating enzyme E2 D3 OS=Mus musculus GN=Ube2d3 PE=1 SV=1	2	0.00365672	0.725388	0.522766	0.545448	0.660289	-0.463175	-0.935764	-0.874487	-0.59883
Q9ER74	SALL1_MOUSE	Sal-like protein 1 OS=Mus musculus GN=Sall1 PE=1 SV=1	2	0.00389337	0.757403	0.612188	0.580846	0.711341	-0.400867	-0.707953	-0.783773	-0.491388
P32067	LA_MOUSE	Lupus La protein homolog OS=Mus musculus GN=Ssb PE=2 SV=1	4	0.00407849	1.23833	1.3007	1.04861	1.66683	0.308392	0.379285	0.0684847	0.737106
Q8R105	VP37C_MOUSE	Vacuolar protein sorting-associated protein 37C OS=Mus musculus GN=Vps37c PE=2 SV=1	3	0.00410899	1.25281	1.46228	1.53705	1.18623	0.325167	0.54822	0.620162	0.246385
Q8CJ53	CIP4_MOUSE	Cdc42-interacting protein 4 OS=Mus musculus GN=Trip10 PE=1 SV=2	5	0.00418016	0.93797	0.818124	0.649598	0.839812	-0.0923863	-0.289608	-0.622381	-0.251862
Q924W7	ST5_MOUSE	Suppression of tumorigenicity 5 protein OS=Mus musculus GN=St5 PE=2 SV=1	2	0.0043471	1.38833	1.39758	2.15466	3.08041	0.473352	0.482933	1.10746	1.62312
Q6PAL1	DRAXI_MOUSE	Draxin OS=Mus musculus GN=Draxin PE=1 SV=2	7	0.00508282	0.799342	0.695508	0.69983	0.650593	-0.323115	-0.523861	-0.514923	-0.620172
Q3UTY6	THSD4_MOUSE	Thrombospondin type-1 domain-containing protein 4 OS=Mus musculus GN=Thsd4 PE=1 SV=2	5	0.00511962	1.5902	1.05874	0.995295	0.990306	0.669205	0.082346	-0.00680353	-0.0140536
Q52KR3	PRUN2_MOUSE	Protein prune homolog 2 OS=Mus musculus GN=Prune2 PE=2 SV=2	3	0.00519892	0.495809	0.41775	0.38964	0.410516	-1.01214	-1.25929	-1.35979	-1.28449
Q8BGA2	LHPL2_MOUSE	Lipoma HMGIC fusion partner-like 2 protein OS=Mus musculus GN=Lhfpl2 PE=2 SV=1	2	0.00545365	1.07163	0.588412	0.567541	0.517883	0.0998124	-0.765101	-0.817204	-0.949303
Q9D2R0	AACS_MOUSE	Acetoacetyl-CoA synthetase OS=Mus musculus GN=Aacs PE=1 SV=1	3	0.00566448	0.670295	0.620366	0.596053	0.612768	-0.577132	-0.688809	-0.746488	-0.706588
Q8K3H5	MYO3A_MOUSE	Myosin-IIIa OS=Mus musculus GN=Myo3a PE=2 SV=1	4	0.00578263	1.56311	1.79292	3.29812	1.49695	0.644418	0.842313	1.72164	0.582029
Q8VHJ7	PRGC2_MOUSE	Peroxisome proliferator-activated receptor gamma coactivator 1-beta OS=Mus musculus GN=Ppargc1b PE=1 SV=1	2	0.0062044	1.47634	1.20937	1.22357	1.88392	0.562025	0.274252	0.291095	0.913739
Q6NXJ0	WWC2_MOUSE	Protein WWC2 OS=Mus musculus GN=Wwc2 PE=2 SV=1	2	0.00622241	1.1624	1.21966	1.56146	1.35301	0.217104	0.286482	0.642898	0.436171
Q8BTZ7	GMPPB_MOUSE	Mannose-1-phosphate guanyltransferase beta OS=Mus musculus GN=Gmppb PE=2 SV=1	8	0.00633438	0.63198	0.886675	0.732276	1.30263	-0.66205	-0.173522	-0.44954	0.38143
Q9CY58	PAIRB_MOUSE	Plasminogen activator inhibitor 1 RNA-binding protein OS=Mus musculus GN=Serbp1 PE=1 SV=2	2	0.00637122	0.661267	0.537638	0.451827	0.613314	-0.596695	-0.895292	-1.14616	-0.705301
Q8VD62	CK068_MOUSE	UPF0696 protein C11orf68 homolog OS=Mus musculus GN=Bles03 PE=2 SV=1	1	0.00639111	0.721592	0.831439	0.63575	0.847073	-0.470745	-0.266317	-0.653469	-0.239442
A2AM29	AF9_MOUSE	Protein AF-9 OS=Mus musculus GN=Mllt3 PE=1 SV=1	1	0.00653735	1.13888	0.676421	0.566179	1.0597	0.187611	-0.564007	-0.82067	0.083662
Q9Z261	CLD7_MOUSE	Claudin-7 OS=Mus musculus GN=Cldn7 PE=1 SV=1	2	0.00703378	0.706812	0.741122	0.595911	0.763664	-0.500602	-0.432217	-0.746832	-0.38899
Q9Z0G0	GIPC1_MOUSE	PDZ domain-containing protein GIPC1 OS=Mus musculus GN=Gipc1 PE=1 SV=1	3	0.00713346	1.23306	1.29649	1.51703	1.34282	0.302239	0.374615	0.601251	0.425271
Q60662	AKAP4_MOUSE	A-kinase anchor protein 4 OS=Mus musculus GN=Akap4 PE=1 SV=1	3	0.00721633	0.736919	0.690996	0.654211	0.708222	-0.440423	-0.533252	-0.612172	-0.497726
Q91ZV0	CTGE5_MOUSE	cTAGE family member 5 OS=Mus musculus GN=Ctage5 PE=1 SV=1	2	0.00814287	0.960081	0.608182	0.517644	0.616794	-0.0587718	-0.717424	-0.949967	-0.69714
Q8CI59	STEA3_MOUSE	Metalloreductase STEAP3 OS=Mus musculus GN=Steap3 PE=1 SV=1	4	0.00849986	1.0881	1.38342	1.09636	1.51635	0.121807	0.468241	0.132728	0.600603
Q61937	NPM_MOUSE	Nucleophosmin OS=Mus musculus GN=Npm1 PE=1 SV=1	8	0.00944906	0.998449	0.80258	0.634148	0.921549	-0.0022393	-0.317282	-0.657108	-0.117868
Q91XE9	CR3L3_MOUSE	Cyclic AMP-responsive element-binding protein 3-like protein 3 OS=Mus musculus GN=Creb3l3 PE=2 SV=1	2	0.0100145	0.914574	0.302645	0.687258	0.471537	-0.128828	-1.7243	-0.541076	-1.08456
Q8CG85	MAMC2_MOUSE	MAM domain-containing protein 2 OS=Mus musculus GN=Mamdc2 PE=1 SV=1	2	0.0102517	1.00804	1.18189	1.60159	1.15051	0.01156	0.241094	0.679501	0.202275
Q924K8	MTA3_MOUSE	Metastasis-associated protein MTA3 OS=Mus musculus GN=Mta3 PE=1 SV=1	2	0.0110467	0.736354	0.57913	0.639421	0.635153	-0.441529	-0.788041	-0.645162	-0.654824
A2TJV2	PALM3_MOUSE	Paralemmin-3 OS=Mus musculus GN=Palm3 PE=2 SV=1	3	0.0111402	0.511141	0.354551	0.478554	0.718196	-0.968206	-1.49594	-1.06325	-0.47755
Q8K211	COPT1_MOUSE	High affinity copper uptake protein 1 OS=Mus musculus GN=Slc31a1 PE=2 SV=1	2	0.0114931	0.700333	0.862263	0.614093	0.82329	-0.513888	-0.213801	-0.703471	-0.280527
A2A7S8	K1522_MOUSE	Uncharacterized protein KIAA1522 OS=Mus musculus GN=Kiaa1522 PE=1 SV=1	4	0.0120198	1.01437	1.20058	1.15581	1.50737	0.0205871	0.263731	0.208909	0.592035
P17047	LAMP2_MOUSE	Lysosome-associated membrane glycoprotein 2 OS=Mus musculus GN=Lamp2 PE=2 SV=2	3	0.0122391	1.36583	1.7192	1.28701	2.00807	0.449783	0.78174	0.36402	1.00581
Q9Z2U0	PSA7_MOUSE	Proteasome subunit alpha type-7 OS=Mus musculus GN=Psma7 PE=1 SV=1	6	0.0134477	1.27274	1.32086	1.50209	1.27097	0.347936	0.401472	0.586974	0.345927
Q9CZ91	SRFB1_MOUSE	Serum response factor-binding protein 1 OS=Mus musculus GN=Srfbp1 PE=1 SV=1	2	0.0149872	0.80617	0.771181	0.677078	0.653985	-0.310843	-0.374859	-0.562606	-0.612671
Q5SUS0	FBW10_MOUSE	F-box/WD repeat-containing protein 10 OS=Mus musculus GN=Fbxw10 PE=2 SV=1	3	0.0150286	0.681563	0.670634	0.697463	0.557331	-0.553081	-0.576402	-0.519812	-0.843392
Q99MT7	GPR87_MOUSE	G-protein coupled receptor 87 OS=Mus musculus GN=Gpr87 PE=2 SV=2	2	0.0154905	0.438862	0.528988	0.844733	0.877098	-1.18816	-0.918693	-0.243433	-0.18919
P41105	RL28_MOUSE	60S ribosomal protein L28 OS=Mus musculus GN=Rpl28 PE=1 SV=2	2	0.015561	0.643708	0.632065	0.65415	0.711114	-0.635523	-0.661856	-0.612306	-0.491848
Q80XC3	US6NL_MOUSE	USP6 N-terminal-like protein OS=Mus musculus GN=Usp6nl PE=1 SV=2	2	0.0169462	0.516564	0.55364	0.550928	0.543649	-0.952982	-0.852979	-0.860064	-0.879253
Q9Z204	HNRPC_MOUSE	Heterogeneous nuclear ribonucleoproteins C1/C2 OS=Mus musculus GN=Hnrnpc PE=1 SV=1	7	0.0170886	1.54058	1.37385	1.18404	2.04965	0.623471	0.458224	0.24372	1.03538
Q8BNE1	TCAF1_MOUSE	TRPM8 channel-associated factor 1 OS=Mus musculus GN=Tcaf1 PE=2 SV=1	2	0.0174137	2.23096	2.11725	3.27797	1.35419	1.15767	1.08219	1.7128	0.437433
P12850	GROA_MOUSE	Growth-regulated alpha protein OS=Mus musculus GN=Cxcl1 PE=1 SV=1	2	0.0177072	0.98084	1.51039	0.774228	0.651645	-0.0279099	0.594918	-0.36917	-0.617843
Q3TBD2	HMHA1_MOUSE	Minor histocompatibility protein HA-1 OS=Mus musculus GN=Hmha1 PE=1 SV=2	3	0.0179081	1.93937	1.56656	1.94805	1.4249	0.955587	0.6476	0.962033	0.510858
Q9Z0K8	VNN1_MOUSE	Pantetheinase OS=Mus musculus GN=Vnn1 PE=1 SV=3	2	0.0188519	1.44166	1.21152	1.50012	0.931783	0.527729	0.276823	0.585081	-0.101935
Q62181	SEM3C_MOUSE	Semaphorin-3C OS=Mus musculus GN=Sema3c PE=1 SV=2	7	0.0189102	0.705944	0.647774	0.692549	0.629232	-0.502374	-0.626437	-0.530011	-0.668335
Q3UQU0	BRD9_MOUSE	Bromodomain-containing protein 9 OS=Mus musculus GN=Brd9 PE=2 SV=1	2	0.019411	0.905164	0.893471	0.842179	0.590603	-0.143748	-0.162508	-0.247802	-0.759739
O70423	AOC3_MOUSE	Membrane primary amine oxidase OS=Mus musculus GN=Aoc3 PE=2 SV=3	4	0.0195529	1.54594	1.45464	1.35545	1.85921	0.628483	0.540661	0.438769	0.89469
Q8BGS1	E41L5_MOUSE	Band 4.1-like protein 5 OS=Mus musculus GN=Epb41l5 PE=1 SV=1	3	0.020943	0.667933	0.757442	0.603852	0.739741	-0.582225	-0.400792	-0.727734	-0.434907
Q69ZL1	FGD6_MOUSE	FYVE, RhoGEF and PH domain-containing protein 6 OS=Mus musculus GN=Fgd6 PE=1 SV=2	2	0.0218267	0.784965	0.466129	0.552669	0.53074	-0.349299	-1.1012	-0.855513	-0.913923
Q922D4	PP6R3_MOUSE	Serine/threonine-protein phosphatase 6 regulatory subunit 3 OS=Mus musculus GN=Ppp6r3 PE=1 SV=1	4	0.0228564	1.2585	1.23967	1.82785	1.2277	0.331711	0.309959	0.870145	0.295957
Q9DCV7	K2C7_MOUSE	Keratin, type II cytoskeletal 7 OS=Mus musculus GN=Krt7 PE=1 SV=1	4	0.023603	0.618134	0.903107	0.725039	0.949036	-0.694009	-0.147031	-0.463869	-0.0754651
Q4VBE8	WDR18_MOUSE	WD repeat-containing protein 18 OS=Mus musculus GN=Wdr18 PE=1 SV=1	5	0.0243155	0.605696	0.774339	1.12395	1.11291	-0.723334	-0.368962	0.168581	0.154339
P52293	IMA2_MOUSE	Importin subunit alpha-2 OS=Mus musculus GN=Kpna2 PE=1 SV=2	2	0.0264493	0.866079	1.01225	0.649336	1.66398	-0.207429	0.0175685	-0.622963	0.734634
Q7TSH3	ZN516_MOUSE	Zinc finger protein 516 OS=Mus musculus GN=Znf516 PE=2 SV=1	2	0.0266365	1.0806	1.59838	1.19466	1.1558	0.111837	0.676611	0.2566	0.208895
Q99MD9	NASP_MOUSE	Nuclear autoantigenic sperm protein OS=Mus musculus GN=Nasp PE=1 SV=2	2	0.0271816	0.705226	0.44492	0.361271	0.491631	-0.503841	-1.16838	-1.46884	-1.02435
Q6PAV2	HERC4_MOUSE	Probable E3 ubiquitin-protein ligase HERC4 OS=Mus musculus GN=Herc4 PE=2 SV=2	3	0.0297222	1.47399	1.36096	1.76988	1.6092	0.559723	0.444623	0.823654	0.686345
Q61072	ADAM9_MOUSE	Disintegrin and metalloproteinase domain-containing protein 9 OS=Mus musculus GN=Adam9 PE=1 SV=2	3	0.029801	1.17689	1.02694	1.39522	1.5325	0.234976	0.0383537	0.480494	0.615888
Q91ZJ5	UGPA_MOUSE	UTP--glucose-1-phosphate uridylyltransferase OS=Mus musculus GN=Ugp2 PE=2 SV=3	4	0.0300175	1.55037	1.22026	1.3604	0.993467	0.632616	0.287185	0.444029	-0.00945559
Q8C170	MYO9A_MOUSE	Unconventional myosin-IXa OS=Mus musculus GN=Myo9a PE=1 SV=2	2	0.0312013	0.878954	1.09836	1.51656	1.80787	-0.18614	0.135354	0.6008	0.854291
Q8BXL9	IFFO1_MOUSE	Intermediate filament family orphan 1 OS=Mus musculus GN=Iffo1 PE=2 SV=1	3	0.0318535	0.781669	0.797412	0.66693	0.856276	-0.35537	-0.326603	-0.584392	-0.223852
Q80TL7	MON2_MOUSE	Protein MON2 homolog OS=Mus musculus GN=Mon2 PE=2 SV=2	5	0.0325422	1.46576	1.33666	1.64336	1.16647	0.551648	0.418632	0.716646	0.222151
Q6NXH9	K2C73_MOUSE	Keratin, type II cytoskeletal 73 OS=Mus musculus GN=Krt73 PE=1 SV=1	3	0.0328162	0.934107	0.577056	0.433267	0.461215	-0.0983395	-0.793216	-1.20667	-1.11649
Q62422	OSTF1_MOUSE	Osteoclast-stimulating factor 1 OS=Mus musculus GN=Ostf1 PE=1 SV=2	2	0.0352607	1.64134	1.19092	1.66857	2.32185	0.714875	0.252082	0.738615	1.21528
Q9EQK5	MVP_MOUSE	Major vault protein OS=Mus musculus GN=Mvp PE=1 SV=4	23	0.0370874	1.36686	1.253	1.41854	1.7891	0.450866	0.325382	0.504403	0.839236
O35643	AP1B1_MOUSE	AP-1 complex subunit beta-1 OS=Mus musculus GN=Ap1b1 PE=1 SV=2	2	0.0383721	0.903854	0.889348	0.767204	0.646771	-0.145839	-0.16918	-0.382318	-0.628674
P55284	CADH5_MOUSE	Cadherin-5 OS=Mus musculus GN=Cdh5 PE=1 SV=2	2	0.0387216	1.80846	1.61251	2.19449	1.17892	0.854759	0.689306	1.13389	0.237461
Q62159	RHOC_MOUSE	Rho-related GTP-binding protein RhoC OS=Mus musculus GN=Rhoc PE=1 SV=2	2	0.0396003	0.535757	0.445011	0.181301	0.686222	-0.90035	-1.16809	-2.46354	-0.543253
Q8BJR6	PRS27_MOUSE	Serine protease 27 OS=Mus musculus GN=Prss27 PE=2 SV=1	2	0.0396437	0.768817	0.440865	0.419992	0.386903	-0.379287	-1.18159	-1.25157	-1.36995
Q93092	TALDO_MOUSE	Transaldolase OS=Mus musculus GN=Taldo1 PE=1 SV=2	4	0.0404354	1.23717	1.2834	1.50287	1.00861	0.307044	0.359965	0.587724	0.012372
Q5SVL6	RPGP2_MOUSE	Rap1 GTPase-activating protein 2 OS=Mus musculus GN=Rap1gap2 PE=1 SV=1	3	0.0405638	1.08672	0.649512	0.657083	0.63598	0.119977	-0.622573	-0.605853	-0.652947
P48725	PCNT_MOUSE	Pericentrin OS=Mus musculus GN=Pcnt PE=1 SV=2	5	0.040746	1.00379	0.722731	0.573779	0.575828	0.00546058	-0.468469	-0.801432	-0.796289
Q61838	A2M_MOUSE	Alpha-2-macroglobulin OS=Mus musculus GN=A2m PE=1 SV=3	11	0.0409295	1.07389	1.24613	1.60661	1.35646	0.10284	0.317458	0.684023	0.439852
Q3UV17	K22O_MOUSE	Keratin, type II cytoskeletal 2 oral OS=Mus musculus GN=Krt76 PE=2 SV=1	6	0.0412407	0.940709	0.672718	0.585608	0.585925	-0.0881792	-0.571927	-0.771994	-0.771213
P08730	K1C13_MOUSE	Keratin, type I cytoskeletal 13 OS=Mus musculus GN=Krt13 PE=1 SV=2	4	0.0421124	1.2452	1.14013	2.51008	2.07618	0.316379	0.189195	1.32773	1.05393
O88689	PCDA4_MOUSE	Protocadherin alpha-4 OS=Mus musculus GN=Pcdha4 PE=1 SV=1	3	0.0432977	0.818528	0.763926	0.639458	1.10739	-0.288896	-0.388495	-0.645078	0.147166
Q9QZI8	SERC1_MOUSE	Serine incorporator 1 OS=Mus musculus GN=Serinc1 PE=1 SV=1	1	0.0445641	1.15299	1.40038	1.52295	1.52497	0.205384	0.485822	0.606864	0.608779
P11835	ITB2_MOUSE	Integrin beta-2 OS=Mus musculus GN=Itgb2 PE=1 SV=2	4	0.0469946	0.727008	0.598435	0.466514	0.60349	-0.459958	-0.740733	-1.10001	-0.728598
O35945	AL1A7_MOUSE	Aldehyde dehydrogenase, cytosolic 1 OS=Mus musculus GN=Aldh1a7 PE=2 SV=1	2	0.0472149	1.1554	1.26048	3.07627	2.00334	0.208395	0.333977	1.62118	1.00241
P63038	CH60_MOUSE	60 kDa heat shock protein, mitochondrial OS=Mus musculus GN=Hspd1 PE=1 SV=1	5	0.0472756	1.50634	1.31504	1.63268	1.19675	0.591047	0.395107	0.707241	0.259119
O08585	CLCA_MOUSE	Clathrin light chain A OS=Mus musculus GN=Clta PE=1 SV=2	3	0.0483164	1.04619	1.27997	0.976965	1.65734	0.0651449	0.356105	-0.0336209	0.728866
O35593	PSDE_MOUSE	26S proteasome non-ATPase regulatory subunit 14 OS=Mus musculus GN=Psmd14 PE=1 SV=2	6	0.0486312	0.97497	1.02714	1.50952	1.17751	-0.0365709	0.0386268	0.594091	0.235735
Q69ZF7	CNNM4_MOUSE	Metal transporter CNNM4 OS=Mus musculus GN=Cnnm4 PE=1 SV=2	4	0.0489397	1.63381	1.70976	1.64845	1.20556	0.708241	0.77379	0.721114	0.2697
Q8BTG3	T11L1_MOUSE	T-complex protein 11-like protein 1 OS=Mus musculus GN=Tcp11l1 PE=2 SV=1	3	0.0490571	1.46195	1.25506	1.55752	1.15166	0.547895	0.327761	0.639248	0.203716
