# Supplementary material for: Comparative Proteomics Analysis of Exosomes Identifies Key Pathways and Protein Markers Related to Breast Cancer Metastasis
Source: Int J Mol Sci. 2023 Feb 17;24(4):4033. doi: 10.3390/ijms24044033 (PMC9967130; doi:10.3390/ijms24044033)
Supplement: Supplementary file 1 [file ijms-24-04033-s001.zip › Table S5 TOP20 altered proteins (Tumor vs Control).xlsx]

## Sheet: Table S5
Table S3	TOP20 altered proteins with the highest fold changes in each set of tumor/control comparison.
116/EpH	Protein AC	Protein ID	ANOVA p-value	Log2 Protein ratio	1424/EpH	Protein AC	Protein ID	ANOVA p-value	Log2 Protein ratio	1424.1/EpH	Protein AC	Protein ID	ANOVA p-value	Log2 Protein ratio	1424.2/EpH	Protein AC	Protein ID	ANOVA p-value	Log2 Protein ratio
Up-regulated	Q8C0Q9	RPGF5_MOUSE	3.23605e-05	3.50838	Up-regulated	Q8C0Q9	RPGF5_MOUSE	3.23605e-05	6.26004	Up-regulated	Q8C0Q9	RPGF5_MOUSE	3.23605e-05	7.89115	Up-regulated	Q8C0Q9	RPGF5_MOUSE	3.23605e-05	7.70549
	P01887	B2MG_MOUSE	4.90834e-06	2.45319		P17225	PTBP1_MOUSE	1.78891e-07	3.79075		P17225	PTBP1_MOUSE	1.78891e-07	5.96094		Q60949	TBCD1_MOUSE	7.93627e-08	5.08501
	Q9R1Q9	VAS1_MOUSE	0.00030324	1.86812		P01887	B2MG_MOUSE	4.90834e-06	3.18742		Q60949	TBCD1_MOUSE	7.93627e-08	5.10543		P17225	PTBP1_MOUSE	1.78891e-07	5.02698
	P29416	HEXA_MOUSE	1.00758e-05	1.5796		Q60949	TBCD1_MOUSE	7.93627e-08	2.96894		Q6EDY6	LR16A_MOUSE	3.86865e-06	4.6465		P97436	NKX31_MOUSE	4.58523e-08	4.40695
	P56203	CATW_MOUSE	4.94075e-16	1.54854		Q6EDY6	LR16A_MOUSE	3.86865e-06	2.55611		Q922J3	CLIP1_MOUSE	6.66595e-11	4.52925		Q922J3	CLIP1_MOUSE	6.66595e-11	4.32472
	Q6EDY6	LR16A_MOUSE	3.86865e-06	1.47544		Q922J3	CLIP1_MOUSE	6.66595e-11	2.39731		Q5M8M2	ODF3B_MOUSE	8.59585e-05	4.22221		Q5M8M2	ODF3B_MOUSE	8.59585e-05	3.82996
	P17225	PTBP1_MOUSE	1.78891e-07	1.46982		Q5M8M2	ODF3B_MOUSE	8.59585e-05	2.31155		Q5NCE8	MRS2_MOUSE	2.69806e-05	4.10828		Q6EDY6	LR16A_MOUSE	3.86865e-06	3.50441
	Q60949	TBCD1_MOUSE	7.93627e-08	1.40128		P97436	NKX31_MOUSE	4.58523e-08	2.28501		P97436	NKX31_MOUSE	4.58523e-08	4.04511		Q5NCE8	MRS2_MOUSE	2.69806e-05	3.15853
	Q922J3	CLIP1_MOUSE	6.66595e-11	1.3439		Q9D5K4	S1PBP_MOUSE	1.52677e-08	2.07248		A2CG49	KALRN_MOUSE	2.4617e-06	3.62766		Q9D5K4	S1PBP_MOUSE	1.52677e-08	3.15484
	O88551	CLD1_MOUSE	3.30824e-08	1.34106		A2CG49	KALRN_MOUSE	2.4617e-06	2.02867		Q9D5K4	S1PBP_MOUSE	1.52677e-08	3.15415		Q640L5	CCD18_MOUSE	1.50628e-06	3.09797
	P97436	NKX31_MOUSE	4.58523e-08	1.32264		O88551	CLD1_MOUSE	3.30824e-08	1.84478		Q640L5	CCD18_MOUSE	1.50628e-06	2.88394		Q61009	SCRB1_MOUSE	0.00251286	3.02672
	P52795	EFNB1_MOUSE	0.000348644	1.18261		Q5NCE8	MRS2_MOUSE	2.69806e-05	1.81003		Q99MV1	TDRD1_MOUSE	3.54048e-07	2.11971		A2CG49	KALRN_MOUSE	2.4617e-06	2.56498
	Q8BNE1	TCAF1_MOUSE	0.0174137	1.15767		Q9R1Q9	VAS1_MOUSE	0.00030324	1.61515		Q91XQ0	DYH8_MOUSE	1.84328e-05	2.06326		Q91XQ0	DYH8_MOUSE	1.84328e-05	2.44798
	Q61207	SAP_MOUSE	2.0306e-06	1.07133		Q640L5	CCD18_MOUSE	1.50628e-06	1.59549		Q8R1V4	TMED4_MOUSE	1.5899e-05	1.94143		Q91YQ5	RPN1_MOUSE	0.000340361	2.2405
	P17095	HMGA1_MOUSE	7.86042e-06	1.03534		Q91YQ5	RPN1_MOUSE	0.000340361	1.41594		P01887	B2MG_MOUSE	4.90834e-06	1.76852		Q99MV1	TDRD1_MOUSE	3.54048e-07	2.22336
	P63158	HMGB1_MOUSE	3.10311e-05	0.985697		P52795	EFNB1_MOUSE	0.000348644	1.41488		Q8K3H5	MYO3A_MOUSE	0.00578263	1.72164		Q8R1V4	TMED4_MOUSE	1.5899e-05	2.20013
	Q3TBD2	HMHA1_MOUSE	0.0179081	0.955587		Q60737	CSK21_MOUSE	4.94288e-07	1.41013		Q8BNE1	TCAF1_MOUSE	0.0174137	1.7128		Q60737	CSK21_MOUSE	4.94288e-07	2.05943
	Q8R1V4	TMED4_MOUSE	1.5899e-05	0.918233		Q99MV1	TDRD1_MOUSE	3.54048e-07	1.36818		P08122	CO4A2_MOUSE	3.9501e-06	1.71072		P08122	CO4A2_MOUSE	3.9501e-06	1.9531
	Q9D5K4	S1PBP_MOUSE	1.52677e-08	0.914985		Q9JKA5	GPA33_MOUSE	8.26515e-05	1.28249		O35945	AL1A7_MOUSE	0.0472149	1.62118		Q9JMC3	DNJA4_MOUSE	9.58509e-06	1.93677
	Q5M8M2	ODF3B_MOUSE	8.59585e-05	0.85793		P11157	RIR2_MOUSE	0.00144941	1.18351		Q91YQ5	RPN1_MOUSE	0.000340361	1.35462		Q3TCN2	PLBL2_MOUSE	0.00335018	1.91803
Down-regulated	Q8K182	CO8A_MOUSE	1.22694e-09	-1.52459	Down-regulated	Q8VDQ9	KRI1_MOUSE	0.00243182	-1.49965	Down-regulated	Q8R366	IGSF8_MOUSE	9.77112e-11	-1.63502	Down-regulated	Q52KR3	PRUN2_MOUSE	0.00519892	-1.28449
	Q9WTL2	RAB25_MOUSE	4.50771e-08	-1.53579		P20033	PDGFA_MOUSE	5.59686e-06	-1.50992		Q9Z1P8	ANGL4_MOUSE	3.53472e-11	-1.64358		Q8R366	IGSF8_MOUSE	9.77112e-11	-1.30442
	O09118	NET1_MOUSE	7.72259e-07	-1.53896		Q91WG5	AAKG2_MOUSE	0.000580312	-1.51164		Q9JJI8	RL38_MOUSE	7.68749e-05	-1.65557		P39876	TIMP3_MOUSE	4.75364e-07	-1.32394
	P62751	RL23A_MOUSE	3.92185e-07	-1.63489		Q9CZX8	RS19_MOUSE	7.70832e-10	-1.56486		Q05816	FABP5_MOUSE	8.44238e-06	-1.73439		Q8BJR6	PRS27_MOUSE	0.0396437	-1.36995
	P47915	RL29_MOUSE	4.06559e-06	-1.70057		P11276	FINC_MOUSE	0.00066731	-1.57171		Q61581	IBP7_MOUSE	2.48437e-09	-1.74679		P08249	MDHM_MOUSE	2.89403e-05	-1.41516
	Q9QZM4	TR10B_MOUSE	0.000353288	-1.72758		Q61581	IBP7_MOUSE	2.48437e-09	-1.63074		Q02013	AQP1_MOUSE	2.13426e-05	-1.78581		P20033	PDGFA_MOUSE	5.59686e-06	-1.49816
	Q6ZWV7	RL35_MOUSE	7.4951e-07	-1.74309		Q91XE9	CR3L3_MOUSE	0.0100145	-1.7243		Q6ZWV7	RL35_MOUSE	7.4951e-07	-1.80143		Q8BHL4	RAI3_MOUSE	3.32808e-09	-1.5115
	P17515	CXL10_MOUSE	2.3273e-05	-1.80867		Q02013	AQP1_MOUSE	2.13426e-05	-1.77102		P43276	H15_MOUSE	2.02152e-07	-1.8219		O70514	FGFP1_MOUSE	8.476e-09	-1.55965
	Q9Z1P8	ANGL4_MOUSE	3.53472e-11	-1.88114		O70514	FGFP1_MOUSE	8.476e-09	-1.79771		Q8BHL4	RAI3_MOUSE	3.32808e-09	-1.83054		O09118	NET1_MOUSE	7.72259e-07	-1.60167
	Q9D2G2	ODO2_MOUSE	3.86273e-06	-1.88348		Q9Z1P8	ANGL4_MOUSE	3.53472e-11	-1.9222		Q9CZX8	RS19_MOUSE	7.70832e-10	-1.85352		Q9JMI7	TX101_MOUSE	1.82874e-09	-1.77195
	Q05816	FABP5_MOUSE	8.44238e-06	-1.91834		P17515	CXL10_MOUSE	2.3273e-05	-1.94129		O09118	NET1_MOUSE	7.72259e-07	-1.95061		Q6P5F7	TTYH3_MOUSE	2.02549e-08	-1.84834
	Q8BV57	SRCRL_MOUSE	4.54071e-05	-1.93859		O54819	TFPI1_MOUSE	1.04975e-05	-2.00649		Q8BV57	SRCRL_MOUSE	4.54071e-05	-2.11489		Q9Z1P8	ANGL4_MOUSE	3.53472e-11	-1.94224
	Q8BHL4	RAI3_MOUSE	3.32808e-09	-1.97694		O09118	NET1_MOUSE	7.72259e-07	-2.0154		O70514	FGFP1_MOUSE	8.476e-09	-2.11777		Q61581	IBP7_MOUSE	2.48437e-09	-2.07634
	Q9JJI8	RL38_MOUSE	7.68749e-05	-2.2888		P43276	H15_MOUSE	2.02152e-07	-2.15589		Q8K182	CO8A_MOUSE	1.22694e-09	-2.32057		P17515	CXL10_MOUSE	2.3273e-05	-2.15595
	P43276	H15_MOUSE	2.02152e-07	-2.34274		Q8BV57	SRCRL_MOUSE	4.54071e-05	-2.26707		Q62159	RHOC_MOUSE	0.0396003	-2.46354		Q80UE6	WNK4_MOUSE	0.00147027	-2.48597
	Q9CZX8	RS19_MOUSE	7.70832e-10	-2.41716		Q8K182	CO8A_MOUSE	1.22694e-09	-2.42011		Q9JMI7	TX101_MOUSE	1.82874e-09	-2.57665		P56203	CATW_MOUSE	4.94075e-16	-2.48857
	Q8VHB5	CAH9_MOUSE	0.000137561	-2.45815		Q9JMI7	TX101_MOUSE	1.82874e-09	-2.61648		P17515	CXL10_MOUSE	2.3273e-05	-2.7258		Q8BV57	SRCRL_MOUSE	4.54071e-05	-2.70685
	Q9JMI7	TX101_MOUSE	1.82874e-09	-3.25473		P97430	SLPI_MOUSE	6.2946e-09	-3.37097		P97430	SLPI_MOUSE	6.2946e-09	-3.35878		Q8K182	CO8A_MOUSE	1.22694e-09	-2.91046
	P10922	H10_MOUSE	2.69018e-07	-5.21783		Q80UE6	WNK4_MOUSE	0.00147027	-3.52397		P10922	H10_MOUSE	2.69018e-07	-3.69499		P10922	H10_MOUSE	2.69018e-07	-3.00756
	Q80UE6	WNK4_MOUSE	0.00147027	-6.1366		P10922	H10_MOUSE	2.69018e-07	-4.14493		Q80UE6	WNK4_MOUSE	0.00147027	-5.49895		P97430	SLPI_MOUSE	6.2946e-09	-3.38142
