# Supplementary material for: Comparative Proteomics Analysis of Exosomes Identifies Key Pathways and Protein Markers Related to Breast Cancer Metastasis
Source: Int J Mol Sci. 2023 Feb 17;24(4):4033. doi: 10.3390/ijms24044033 (PMC9967130; doi:10.3390/ijms24044033)
Supplement: Supplementary file 1 [file ijms-24-04033-s001.zip › Table S6 Altered proteins enriched in DisGeNet.xlsx]

## Sheet: Table S6
Table S6	List of altered proteins enriched in the DisGeNet terms of BC and metastasis.
ProteinAC	ProteinID	Protein Name	DisGeNet-BC	DisGeNet-Metastasis	Peptide #	Anova	Protein ratio				Protein ratio (Log2)
							116/EpH	1424/EpH	1424.1/EpH	1424.2/EpH	116/EpH	1424/EpH	1424.1/EpH	1424.2/EpH
Q9Z1P8	ANGL4_MOUSE	Angiopoietin-related protein 4 OS=Mus musculus GN=Angptl4 PE=2 SV=1	Yes	Yes	4	3.53472e-11	0.271469	0.263852	0.320061	0.260212	-1.88114	-1.9222	-1.64358	-1.94224
P10923	OSTP_MOUSE	Osteopontin OS=Mus musculus GN=Spp1 PE=1 SV=1	Yes	Yes	6	1.3134e-05	1.6548	1.55072	0.787133	1.34068	0.726656	0.632934	-0.34532	0.422964
P32507	PVRL2_MOUSE	Poliovirus receptor-related protein 2 OS=Mus musculus GN=Pvrl2 PE=1 SV=2	Yes	Yes	2	3.72429e-05	0.700216	0.683918	0.530302	0.744118	-0.514128	-0.548105	-0.915114	-0.426397
P10639	THIO_MOUSE	Thioredoxin OS=Mus musculus GN=Txn PE=1 SV=3	Yes	Yes	4	4.34367e-05	0.547059	0.89787	0.606542	1.18982	-0.870231	-0.155422	-0.721321	0.250743
P32883	RASK_MOUSE	GTPase KRas OS=Mus musculus GN=Kras PE=1 SV=1	Yes	Yes	2	0.000159777	0.548224	0.643933	0.510298	0.555331	-0.867162	-0.635017	-0.970589	-0.84858
P49817	CAV1_MOUSE	Caveolin-1 OS=Mus musculus GN=Cav1 PE=1 SV=1	Yes	Yes	2	0.000815906	1.08072	1.21549	1.08073	1.54883	0.111999	0.281537	0.112004	0.631178
P40224	SDF1_MOUSE	Stromal cell-derived factor 1 OS=Mus musculus GN=Cxcl12 PE=2 SV=2	Yes	Yes	2	0.00200557	1.17121	1.2528	1.45191	1.55997	0.228002	0.325161	0.537955	0.641516
P06869	UROK_MOUSE	Urokinase-type plasminogen activator OS=Mus musculus GN=Plau PE=1 SV=1		Yes	18	1.5331e-12	0.409227	2.04621	1.23366	1.43171	-1.28903	1.03295	0.302948	0.517743
P10107	ANXA1_MOUSE	Annexin A1 OS=Mus musculus GN=Anxa1 PE=1 SV=2		Yes	14	7.49136e-11	0.81074	1.45226	1.02052	1.94892	-0.30269	0.538304	0.0293	0.962675
P35456	UPAR_MOUSE	Urokinase plasminogen activator surface receptor OS=Mus musculus GN=Plaur PE=1 SV=1		Yes	2	1.16404e-06	0.857818	1.24396	0.872022	1.56491	-0.221256	0.314941	-0.197563	0.646083
P09055	ITB1_MOUSE	Integrin beta-1 OS=Mus musculus GN=Itgb1 PE=1 SV=1		Yes	28	2.94867e-06	0.654895	1.0032	0.799238	1.20013	-0.610664	0.00461346	-0.323302	0.263186
P07091	S10A4_MOUSE	Protein S100-A4 OS=Mus musculus GN=S100a4 PE=1 SV=1		Yes	3	0.000448528	0.492231	0.747823	0.431084	0.684942	-1.02259	-0.41923	-1.21396	-0.545946
Q62159	RHOC_MOUSE	Rho-related GTP-binding protein RhoC OS=Mus musculus GN=Rhoc PE=1 SV=2		Yes	2	0.0396003	0.535757	0.445011	0.181301	0.686222	-0.90035	-1.16809	-2.46354	-0.543253
P62702	RS4X_MOUSE	40S ribosomal protein S4, X isoform OS=Mus musculus GN=Rps4x PE=2 SV=2	Yes		11	6.03099e-10	0.690149	0.956925	0.797047	1.56351	-0.53502	-0.0635229	-0.327264	0.644784
Q61581	IBP7_MOUSE	Insulin-like growth factor-binding protein 7 OS=Mus musculus GN=Igfbp7 PE=2 SV=3	Yes		11	2.48437e-09	0.516158	0.322923	0.297964	0.237116	-0.954114	-1.63074	-1.74679	-2.07634
P21956	MFGM_MOUSE	Lactadherin OS=Mus musculus GN=Mfge8 PE=1 SV=3	Yes		21	8.32766e-09	1.04494	1.62331	0.755768	1.50935	0.0634217	0.698942	-0.403985	0.593923
P62242	RS8_MOUSE	40S ribosomal protein S8 OS=Mus musculus GN=Rps8 PE=1 SV=2	Yes		7	2.98684e-08	0.616746	0.931519	0.735985	1.44512	-0.697251	-0.102343	-0.442251	0.531188
O88551	CLD1_MOUSE	Claudin-1 OS=Mus musculus GN=Cldn1 PE=1 SV=1	Yes		2	3.30824e-08	2.53337	3.59199	2.54601	3.74487	1.34106	1.84478	1.34824	1.90491
P35441	TSP1_MOUSE	Thrombospondin-1 OS=Mus musculus GN=Thbs1 PE=1 SV=1	Yes		73	1.58425e-07	0.617576	0.515388	0.533662	0.48428	-0.695312	-0.956269	-0.906001	-1.04609
P99027	RLA2_MOUSE	60S acidic ribosomal protein P2 OS=Mus musculus GN=Rplp2 PE=1 SV=3	Yes		5	2.89307e-07	0.713539	0.657237	0.638833	0.837654	-0.486935	-0.605515	-0.646488	-0.255574
P62751	RL23A_MOUSE	60S ribosomal protein L23a OS=Mus musculus GN=Rpl23a PE=1 SV=1	Yes		3	3.92185e-07	0.321994	0.455795	0.553553	0.805064	-1.63489	-1.13354	-0.853205	-0.312825
P20033	PDGFA_MOUSE	Platelet-derived growth factor subunit A OS=Mus musculus GN=Pdgfa PE=2 SV=2	Yes		3	5.59686e-06	0.506438	0.351132	0.39303	0.354006	-0.981543	-1.50992	-1.34729	-1.49816
P08752	GNAI2_MOUSE	Guanine nucleotide-binding protein G(i) subunit alpha-2 OS=Mus musculus GN=Gnai2 PE=1 SV=5	Yes		7	6.97946e-06	0.960672	1.25689	0.896685	1.60398	-0.0578835	0.329855	-0.157327	0.681659
P23242	CXA1_MOUSE	Gap junction alpha-1 protein OS=Mus musculus GN=Gja1 PE=1 SV=2	Yes		9	9.46715e-06	0.547278	0.860087	0.461689	0.599344	-0.869654	-0.217445	-1.11501	-0.738544
P34884	MIF_MOUSE	Macrophage migration inhibitory factor OS=Mus musculus GN=Mif PE=1 SV=2	Yes		2	1.08986e-05	0.50331	0.686695	0.51312	0.697984	-0.990482	-0.542258	-0.962632	-0.518734
P20352	TF_MOUSE	Tissue factor OS=Mus musculus GN=F3 PE=1 SV=2	Yes		3	2.54373e-05	0.945963	1.44354	1.50567	1.3302	-0.0801436	0.529608	0.590407	0.411642
P62754	RS6_MOUSE	40S ribosomal protein S6 OS=Mus musculus GN=Rps6 PE=1 SV=1	Yes		5	4.41945e-05	0.554635	0.739543	0.619039	1.32493	-0.85039	-0.435294	-0.691899	0.405913
P11276	FINC_MOUSE	Fibronectin OS=Mus musculus GN=Fn1 PE=1 SV=4	Yes		92	0.00066731	0.676759	0.336409	0.496525	0.603628	-0.563285	-1.57171	-1.01006	-0.728267
Q61188	EZH2_MOUSE	Histone-lysine N-methyltransferase EZH2 OS=Mus musculus GN=Ezh2 PE=1 SV=2	Yes		2	0.00179971	0.876156	0.645611	0.667294	0.458743	-0.190741	-0.631263	-0.583607	-1.12424
Q8VHJ7	PRGC2_MOUSE	Peroxisome proliferator-activated receptor gamma coactivator 1-beta OS=Mus musculus GN=Ppargc1b PE=1 SV=1	Yes		2	0.0062044	1.47634	1.20937	1.22357	1.88392	0.562025	0.274252	0.291095	0.913739
P55284	CADH5_MOUSE	Cadherin-5 OS=Mus musculus GN=Cdh5 PE=1 SV=2	Yes		2	0.0387216	1.80846	1.61251	2.19449	1.17892	0.854759	0.689306	1.13389	0.237461
