# Supplementary material for: Comparative Proteomics Analysis of Exosomes Identifies Key Pathways and Protein Markers Related to Breast Cancer Metastasis
Source: Int J Mol Sci. 2023 Feb 17;24(4):4033. doi: 10.3390/ijms24044033 (PMC9967130; doi:10.3390/ijms24044033)
Supplement: Supplementary file 1 [file ijms-24-04033-s001.zip › Table S7 Metastasis-specific altered proteins.xlsx]

## Sheet: Table S7
Table S7	List of metastasis-specific altered proteins.
Class	ProteinID	Protein name	Gene name	Protein ratio (Log2)
				116/EpH	1424/EpH	1424.1/EpH	1424.2/EpH
Metastatic	GPA33	Cell surface A33 antigen OS=Mus musculus GN=Gpa33 PE=2 SV=2	Gpa33	-0.951951	1.28249	0.721124	0.675689
Metastatic	SLPI	Antileukoproteinase OS=Mus musculus GN=Slpi PE=2 SV=1	Slpi	-0.938287	-3.37097	-3.35878	-3.38142
Metastatic	STX12	Syntaxin-12 OS=Mus musculus GN=Stx12 PE=1 SV=1	Stx12	-0.510668	0.728889	0.686915	1.01496
Metastatic	LYN	Tyrosine-protein kinase Lyn OS=Mus musculus GN=Lyn PE=1 SV=4	Lyn	0.134845	1.16388	0.687488	0.844548
Metastatic	LHPL2	Lipoma HMGIC fusion partner-like 2 protein OS=Mus musculus GN=Lhfpl2 PE=2 SV=1	Lhfpl2	0.0998124	-0.765101	-0.817204	-0.949303
Metastatic	CXCL5	C-X-C motif chemokine 5 OS=Mus musculus GN=Cxcl5 PE=1 SV=2	Cxcl5 Scyb5	0.245722	-0.708239	-0.83406	-1.089
Metastatic	LBP	Lipopolysaccharide-binding protein OS=Mus musculus GN=Lbp PE=2 SV=2	Lbp	0.48231	-0.802955	-1.09559	-0.987689
Metastatic	IBP7	Insulin-like growth factor-binding protein 7 OS=Mus musculus GN=Igfbp7 PE=2 SV=3	Igfbp7 Mac25	-0.954114	-1.63074	-1.74679	-2.07634
Metastatic	CO8A	Complement component C8 alpha chain OS=Mus musculus GN=C8a PE=2 SV=1	C8a	-1.52459	-2.42011	-2.32057	-2.91046
Non-metastatic	HEXA	Beta-hexosaminidase subunit alpha OS=Mus musculus GN=Hexa PE=2 SV=2	Hexa	1.5796	0.533113	0.385457	0.273534
Non-metastatic	ODO2	Dihydrolipoyllysine-residue succinyltransferase component of 2-oxoglutarate dehydrogenase complex, mitochondrial OS=Mus musculus GN=Dlst PE=1 SV=1	Dlst	-1.88348	-0.781971	0.0210445	-0.17465
Non-metastatic	CAH9	Carbonic anhydrase 9 OS=Mus musculus GN=Ca9 PE=2 SV=2	Ca9 Car9	-2.45815	-1.23893	-0.891633	-1.05683
Non-metastatic	PARK7	Protein DJ-1 OS=Mus musculus GN=Park7 PE=1 SV=1	Park7	-0.861347	0.263111	-0.2332	-0.0764621
Non-metastatic	RS16	40S ribosomal protein S16 OS=Mus musculus GN=Rps16 PE=2 SV=4	Rps16	-0.636901	-0.044145	-0.112155	0.463317
Non-metastatic	RL11	60S ribosomal protein L11 OS=Mus musculus GN=Rpl11 PE=1 SV=4	Rpl11	-0.595216	-0.0413889	-0.3063	0.425722
Non-metastatic	RS11	40S ribosomal protein S11 OS=Mus musculus GN=Rps11 PE=2 SV=3	Rps11	-0.582224	-0.250203	-0.292022	0.426377
Non-metastatic	RS8	40S ribosomal protein S8 OS=Mus musculus GN=Rps8 PE=1 SV=2	Rps8	-0.697251	-0.102343	-0.442251	0.531188
Non-metastatic	HD	Huntingtin OS=Mus musculus GN=Htt PE=1 SV=2	Htt Hd Hdh	-0.691539	-0.225415	-0.443251	0.489735
Non-metastatic	HMGA1	High mobility group protein HMG-I/HMG-Y OS=Mus musculus GN=Hmga1 PE=1 SV=4	Hmga1 Hmgi Hmgiy	1.03534	-0.402394	-0.709965	-0.216855
Non-metastatic	H10	Histone H1.0 OS=Mus musculus GN=H1f0 PE=2 SV=4	H1-0 H1f0 H1fv	-5.21783	-4.14493	-3.69499	-3.00756
Primary site	UROK	Urokinase-type plasminogen activator OS=Mus musculus GN=Plau PE=1 SV=1	Plau	-1.28903	1.03295	0.302948	0.517743
Primary site	CXB3	Gap junction beta-3 protein OS=Mus musculus GN=Gjb3 PE=1 SV=1	Gjb3 Cxn-31	-0.418093	0.930318	-0.498002	-0.351005
Primary site	SDCB2	Syntenin-2 OS=Mus musculus GN=Sdcbp2 PE=2 SV=1	Sdcbp2	-0.570917	0.817432	0.0714377	0.266336
Primary site	FINC	Fibronectin OS=Mus musculus GN=Fn1 PE=1 SV=4	Fn1	-0.563285	-1.57171	-1.01006	-0.728267
Primary site	TFPI1	Tissue factor pathway inhibitor OS=Mus musculus GN=Tfpi PE=2 SV=1	Tfpi	-0.856203	-2.00649	-1.29742	-0.93647
Primary site	U2AF2	Splicing factor U2AF 65 kDa subunit OS=Mus musculus GN=U2af2 PE=1 SV=3	U2af2 U2af65	0.159141	-0.95806	-0.623643	-0.465342
Kidney/Lung metastasis site	LR16A	Leucine-rich repeat-containing protein 16A OS=Mus musculus GN=Lrrc16a PE=1 SV=2	Carmil1 Carmil Lrrc16 Lrrc16a	1.47544	2.55611	4.6465	3.50441
Kidney/Lung metastasis site	ODF3B	Outer dense fiber protein 3B OS=Mus musculus GN=Odf3b PE=2 SV=1	Odf3b Odf3l3	0.85793	2.31155	4.22221	3.82996
Kidney/Lung metastasis site	TBCD1	TBC1 domain family member 1 OS=Mus musculus GN=Tbc1d1 PE=1 SV=3	Tbc1d1 Kiaa1108 Tbc1	1.40128	2.96894	5.10543	5.08501
Kidney/Lung metastasis site	NKX31	Homeobox protein Nkx-3.1 OS=Mus musculus GN=Nkx3-1 PE=1 SV=1	Nkx3-1 Nkx-3.1 Nkx3a	1.32264	2.28501	4.04511	4.40695
Kidney/Lung metastasis site	CLIP1	CAP-Gly domain-containing linker protein 1 OS=Mus musculus GN=Clip1 PE=1 SV=1	Clip1 Kiaa4046 Rsn	1.3439	2.39731	4.52925	4.32472
Kidney/Lung metastasis site	RL37A	60S ribosomal protein L37a OS=Mus musculus GN=Rpl37a PE=2 SV=2	Rpl37a	-1.23172	-0.75016	0.898103	0.653075
Kidney/Lung metastasis site	RPGF5	Rap guanine nucleotide exchange factor 5 OS=Mus musculus GN=Rapgef5 PE=2 SV=2	Rapgef5 Gfr Kiaa0277 Mrgef	3.50838	6.26004	7.89115	7.70549
Kidney/Lung metastasis site	TMED4	Transmembrane emp24 domain-containing protein 4 OS=Mus musculus GN=Tmed4 PE=2 SV=1	Tmed4 Ers25	0.918233	1.04344	1.94143	2.20013
Kidney/Lung metastasis site	TDRD1	Tudor domain-containing protein 1 OS=Mus musculus GN=Tdrd1 PE=1 SV=2	Tdrd1	0.784619	1.36818	2.11971	2.22336
Kidney/Lung metastasis site	PLBL2	Putative phospholipase B-like 2 OS=Mus musculus GN=Plbd2 PE=1 SV=2	Plbd2	0.703638	0.473478	1.19434	1.91803
Kidney/Lung metastasis site	DNJA4	DnaJ homolog subfamily A member 4 OS=Mus musculus GN=Dnaja4 PE=2 SV=1	Dnaja4	0.834517	0.561972	1.3101	1.93677
Kidney/Lung metastasis site	DYH8	Dynein heavy chain 8, axonemal OS=Mus musculus GN=Dnahc8 PE=2 SV=2	Dnah8 Dnahc8	0.45606	0.839691	2.06326	2.44798
Kidney/Lung metastasis site	CO4A2	Collagen alpha-2(IV) chain OS=Mus musculus GN=Col4a2 PE=2 SV=4	Col4a2	0.160092	0.479522	1.71072	1.9531
Kidney/Lung metastasis site	AL1A7	Aldehyde dehydrogenase, cytosolic 1 OS=Mus musculus GN=Aldh1a7 PE=2 SV=1	Aldh1a7 Aldh-pb	0.208395	0.333977	1.62118	1.00241
Kidney/Lung metastasis site	ST5	Suppression of tumorigenicity 5 protein OS=Mus musculus GN=St5 PE=2 SV=1	Dennd2b Denn2b St5	0.473352	0.482933	1.10746	1.62312
Kidney/Lung metastasis site	WBP11	WW domain-binding protein 11 OS=Mus musculus GN=Wbp11 PE=1 SV=2	Wbp11 Sipp1	0.240018	0.379466	1.14202	1.67464
Kidney/Lung metastasis site	YBOX3	Y-box-binding protein 3 OS=Mus musculus GN=Ybx3 PE=1 SV=2	Ybx3 Csda Msy4	-0.0917193	0.246369	0.884591	1.63557
Kidney/Lung metastasis site	S10AA	Protein S100-A10 OS=Mus musculus GN=S100a10 PE=2 SV=2	S100a10 Cal1l	-0.464397	0.235683	1.10982	0.949925
Kidney/Lung metastasis site	K1C13	Keratin, type I cytoskeletal 13 OS=Mus musculus GN=Krt13 PE=1 SV=2	Krt13 Krt1-13	0.316379	0.189195	1.32773	1.05393
Kidney/Lung metastasis site	DOCK6	Dedicator of cytokinesis protein 6 OS=Mus musculus GN=Dock6 PE=1 SV=4	Dock6 Kiaa1395	-0.142794	-0.0547849	1.22084	1.28195
Kidney/Lung metastasis site	MYO9A	Unconventional myosin-IXa OS=Mus musculus GN=Myo9a PE=1 SV=2	Myo9a Myr7	-0.18614	0.135354	0.6008	0.854291
Kidney/Lung metastasis site	PADI4	Protein-arginine deiminase type-4 OS=Mus musculus GN=Padi4 PE=2 SV=3	Padi4 Pad4 Pdi4	-0.0606917	0.346447	0.79545	1.10261
Kidney/Lung metastasis site	DUS3L	tRNA-dihydrouridine(47) synthase [NAD(P)(+)]-like OS=Mus musculus GN=Dus3l PE=2 SV=1	Dus3l	0.0457172	0.17797	1.07252	1.22495
Kidney/Lung metastasis site	T176A	Transmembrane protein 176A OS=Mus musculus GN=Tmem176a PE=2 SV=2	Tmem176a Gs188 Keg2	0.0607393	-0.190617	-1.07981	-0.910245
Kidney/Lung metastasis site	PTBP1	Polypyrimidine tract-binding protein 1 OS=Mus musculus GN=Ptbp1 PE=1 SV=2	Ptbp1 Ptb	1.46982	3.79075	5.96094	5.02698
Kidney/Lung metastasis site	KALRN	Kalirin OS=Mus musculus GN=Kalrn PE=1 SV=1	Kalrn	0.728585	2.02867	3.62766	2.56498
Kidney/Lung metastasis site	S1PBP	S100P-binding protein OS=Mus musculus GN=S100pbp PE=2 SV=1	S100pbp	0.914985	2.07248	3.15415	3.15484
Kidney/Lung metastasis site	MRS2	Magnesium transporter MRS2 homolog, mitochondrial OS=Mus musculus GN=Mrs2 PE=2 SV=2	Mrs2 Gm902 Mrs2l	0.0691824	1.81003	4.10828	3.15853
Kidney/Lung metastasis site	CCD18	Coiled-coil domain-containing protein 18 OS=Mus musculus GN=Ccdc18 PE=2 SV=1	Ccdc18	-0.106647	1.59549	2.88394	3.09797
Kidney/Lung metastasis site	SMHD1	Structural maintenance of chromosomes flexible hinge domain-containing protein 1 OS=Mus musculus GN=Smchd1 PE=1 SV=2	Smchd1 Kiaa0650	-0.128969	0.796657	1.2229	1.38914
Kidney/Lung metastasis site	K2C73	Keratin, type II cytoskeletal 73 OS=Mus musculus GN=Krt73 PE=1 SV=1	Krt73 Kb36	-0.0983395	-0.793216	-1.20667	-1.11649
Kidney metastasis site	MYO3A	Myosin-IIIa OS=Mus musculus GN=Myo3a PE=2 SV=1	Myo3a	0.644418	0.842313	1.72164	0.582029
Kidney metastasis site	SRSF3	Serine/arginine-rich splicing factor 3 OS=Mus musculus GN=Srsf3 PE=1 SV=1	Srsf3 Sfrs3 Srp20 X16	0.587816	-0.240672	-0.594348	-0.3684
Kidney metastasis site	AF9	Protein AF-9 OS=Mus musculus GN=Mllt3 PE=1 SV=1	Mllt3 Af9	0.187611	-0.564007	-0.82067	0.083662
Kidney metastasis site	RHOC	Rho-related GTP-binding protein RhoC OS=Mus musculus GN=Rhoc PE=1 SV=2	Rhoc Arhc	-0.90035	-1.16809	-2.46354	-0.543253
Lung metastasis site	RIR2	Ribonucleoside-diphosphate reductase subunit M2 OS=Mus musculus GN=Rrm2 PE=1 SV=1	Rrm2	-0.728436	1.18351	-0.477078	1.31832
Lung metastasis site	GP1BB	Platelet glycoprotein Ib beta chain OS=Mus musculus GN=Gp1bb PE=1 SV=1	Gp1bb	-0.152916	0.645415	-0.187398	0.848568
Lung metastasis site	CAV2	Caveolin-2 OS=Mus musculus GN=Cav2 PE=1 SV=1	Cav2	0.0811367	0.735897	0.142031	1.12044
Lung metastasis site	RD23B	UV excision repair protein RAD23 homolog B OS=Mus musculus GN=Rad23b PE=1 SV=2	Rad23b Mhr23b	-0.446845	0.598156	0.303075	0.801354
Lung metastasis site	GPC1	Glypican-1 OS=Mus musculus GN=Gpc1 PE=1 SV=1	Gpc1	0.200592	0.534546	0.173128	1.30503
Lung metastasis site	KRI1	Protein KRI1 homolog OS=Mus musculus GN=Kri1 PE=1 SV=2	Kri1	0.0475792	-1.49965	-0.476551	-0.658927
Lung metastasis site	CSK21	Casein kinase II subunit alpha OS=Mus musculus GN=Csnk2a1 PE=1 SV=2	Csnk2a1 Ckiia	0.559717	1.41013	0.802975	2.05943
Lung metastasis site	ANXA1	Annexin A1 OS=Mus musculus GN=Anxa1 PE=1 SV=2	Anxa1 Anx1 Lpc-1 Lpc1	-0.30269	0.538304	0.0293	0.962675
Lung metastasis site	CR3L3	Cyclic AMP-responsive element-binding protein 3-like protein 3 OS=Mus musculus GN=Creb3l3 PE=2 SV=1	Creb3l3 Crebh	-0.128828	-1.7243	-0.541076	-1.08456
Lung metastasis site	SCRB1	Scavenger receptor class B member 1 OS=Mus musculus GN=Scarb1 PE=1 SV=1	Scarb1 Srb1	0.244251	0.76933	0.46966	3.02672
Lung metastasis site	H32	Histone H3.2 OS=Mus musculus GN=Hist1h3b PE=1 SV=2	H3c2 H3-53 H3.2 H3b Hist1h3b; H3c3 H3-143 Hist1h3c; H3c4 H3-B Hist1h3d; H3c6 H3-F Hist1h3e; H3c7 H3.2-221 H3f Hist1h3f; H3c13 H3.2-616 Hist2h3b; H3c14 H3.2-615 Hist2h3c1 Hist2h3ca1; H3c15 H3.2-614 Hist2h3c2 Hist2h3ca2	-0.777771	0.174933	-0.32303	1.71479
Lung metastasis site	H4	Histone H4 OS=Mus musculus GN=Hist1h4a PE=1 SV=2	H4c1 Hist1h4a; H4c2 H4-53 Hist1h4b; H4c3 H4-12 Hist1h4c; H4c4 Hist1h4d; H4c6 Hist1h4f; H4c8 Hist1h4h; H4c9 Hist1h4i; H4c11 Hist1h4j; H4c12 Hist1h4k; Hist1h4m; H4c14 Hist2h4 Hist2h4a; H4f16 Hist4h4	-0.734546	0.248668	-0.232025	1.68611
Lung metastasis site	H2B1B	Histone H2B type 1-B OS=Mus musculus GN=Hist1h2bb PE=1 SV=3	H2bc3 Hist1h2bb	-0.928808	0.175323	-0.322929	1.57298
Lung metastasis site	CFA57	Cilia- and flagella-associated protein 57 OS=Mus musculus GN=Cfap57 PE=2 SV=3	Cfap57 Wdr65	-0.850193	0.097488	-0.3499	1.40018
Lung metastasis site	H2A2C	Histone H2A type 2-C OS=Mus musculus GN=Hist2h2ac PE=1 SV=3	H2ac20 Hist2h2ab Hist2h2ac	-0.588639	0.191358	-0.057656	1.51959
Lung metastasis site	INHBA	Inhibin beta A chain OS=Mus musculus GN=Inhba PE=1 SV=1	Inhba	0.812981	0.0432895	-0.0329746	-0.637037
Lung metastasis site	S10A6	Protein S100-A6 OS=Mus musculus GN=S100a6 PE=1 SV=3	S100a6 Cacy	-0.21943	0.655777	0.347118	1.07154
Lung metastasis site	CSK2B	Casein kinase II subunit beta OS=Mus musculus GN=Csnk2b PE=1 SV=1	Csnk2b Ck2n	0.196519	0.792134	0.263531	1.45665
Lung metastasis site	RS4X	40S ribosomal protein S4, X isoform OS=Mus musculus GN=Rps4x PE=2 SV=2	Rps4x Rps4	-0.53502	-0.0635229	-0.327264	0.644784
Lung metastasis site	RL4	60S ribosomal protein L4 OS=Mus musculus GN=Rpl4 PE=1 SV=3	Rpl4	-0.488628	0.107274	-0.109706	0.606721
Lung metastasis site	RL6	60S ribosomal protein L6 OS=Mus musculus GN=Rpl6 PE=1 SV=3	Rpl6	-0.528033	0.172578	-0.199526	0.707314
Lung metastasis site	VAMP3	Vesicle-associated membrane protein 3 OS=Mus musculus GN=Vamp3 PE=1 SV=1	Vamp3 Syb3	-0.400442	0.154202	0.42784	0.601179
Lung metastasis site	TSK	Tsukushin OS=Mus musculus GN=Tsku PE=2 SV=2	Tsku Lrrc54 Tsk	0.277103	-0.238629	-0.172299	-0.739249
Lung metastasis site	RL18	60S ribosomal protein L18 OS=Mus musculus GN=Rpl18 PE=2 SV=3	Rpl18	-0.868643	-0.277511	-0.531049	0.61151
Lung metastasis site	RL7	60S ribosomal protein L7 OS=Mus musculus GN=Rpl7 PE=2 SV=2	Rpl7	-0.77721	-0.0940212	-0.543122	0.70956
Lung metastasis site	KYNU	Kynureninase OS=Mus musculus GN=Kynu PE=2 SV=3	Kynu	-0.713122	0.0259002	-0.290521	1.13814
Lung metastasis site	ANXA2	Annexin A2 OS=Mus musculus GN=Anxa2 PE=1 SV=2	Anxa2 Anx2 Cal1h	-0.592074	-0.181326	-0.412273	0.668485
Lung metastasis site	RL13A	60S ribosomal protein L13a OS=Mus musculus GN=Rpl13a PE=1 SV=4	Rpl13a P198 Tstap198-7	-0.902492	-0.290631	-0.627475	0.667246
Lung metastasis site	CATW	Cathepsin W OS=Mus musculus GN=Ctsw PE=2 SV=2	Ctsw	1.54854	-0.985616	-0.8844	-2.48857
Lung metastasis site	RPN1	Dolichyl-diphosphooligosaccharide--protein glycosyltransferase subunit 1 OS=Mus musculus GN=Rpn1 PE=2 SV=1	Rpn1	-0.0319786	1.41594	1.35462	2.2405
Lung metastasis site	CAD13	Cadherin-13 OS=Mus musculus GN=Cdh13 PE=1 SV=2	Cdh13	0.230856	0.761384	0.798939	1.32757
Lung metastasis site	RTN4	Reticulon-4 OS=Mus musculus GN=Rtn4 PE=1 SV=2	Rtn4 Kiaa0886 Nogo	-0.0780071	0.954516	0.839873	1.35805
Lung metastasis site	TIMP3	Metalloproteinase inhibitor 3 OS=Mus musculus GN=Timp3 PE=2 SV=1	Timp3 Sun Timp-3	0.126312	-0.950816	-1.00069	-1.32394
