# Supplementary material for: Comparative Proteomics Analysis of Exosomes Identifies Key Pathways and Protein Markers Related to Breast Cancer Metastasis
Source: Int J Mol Sci. 2023 Feb 17;24(4):4033. doi: 10.3390/ijms24044033 (PMC9967130; doi:10.3390/ijms24044033)
Supplement: Supplementary file 1 [file ijms-24-04033-s001.zip › Table S8 TOP20 altered proteins (Metastatic vs Non-metastatic).xlsx]

## Sheet: Table S8
Table S8	TOP20 altered proteins with the highest fold changes in each set of metastatic/non-metastatic comparison.
1424/116	Protein AC	Protein ID	ANOVA p-value	Log2 Protein ratio	1424.1/116	Protein AC	Protein ID	ANOVA p-value	Log2 Protein ratio	1424.2/116	Protein AC	Protein ID	ANOVA p-value	Log2 Protein ratio
Up-regulated	Q8C0Q9	RPGF5_MOUSE	3.23605e-05	2.75166	Up-regulated	P17225	PTBP1_MOUSE	1.78891e-07	4.49112	Up-regulated	Q8C0Q9	RPGF5_MOUSE	3.23605e-05	4.19711
	Q80UE6	WNK4_MOUSE	0.00147027	2.61263		Q8C0Q9	RPGF5_MOUSE	3.23605e-05	4.38278		Q60949	TBCD1_MOUSE	7.93627e-08	3.68373
	P06869	UROK_MOUSE	1.5331e-12	2.32198		Q5NCE8	MRS2_MOUSE	2.69806e-05	4.03909		Q80UE6	WNK4_MOUSE	0.00147027	3.65063
	P17225	PTBP1_MOUSE	1.78891e-07	2.32093		Q60949	TBCD1_MOUSE	7.93627e-08	3.70415		P17225	PTBP1_MOUSE	1.78891e-07	3.55716
	Q9JKA5	GPA33_MOUSE	8.26515e-05	2.23444		Q5M8M2	ODF3B_MOUSE	8.59585e-05	3.36428		Q640L5	CCD18_MOUSE	1.50628e-06	3.20462
	P11157	RIR2_MOUSE	0.00144941	1.91194		Q922J3	CLIP1_MOUSE	6.66595e-11	3.18536		Q5NCE8	MRS2_MOUSE	2.69806e-05	3.08935
	Q5NCE8	MRS2_MOUSE	2.69806e-05	1.74085		Q6EDY6	LR16A_MOUSE	3.86865e-06	3.17106		P97436	NKX31_MOUSE	4.58523e-08	3.08431
	Q640L5	CCD18_MOUSE	1.50628e-06	1.70214		Q640L5	CCD18_MOUSE	1.50628e-06	2.99059		Q922J3	CLIP1_MOUSE	6.66595e-11	2.98083
	Q60949	TBCD1_MOUSE	7.93627e-08	1.56767		A2CG49	KALRN_MOUSE	2.4617e-06	2.89908		Q5M8M2	ODF3B_MOUSE	8.59585e-05	2.97203
	Q5M8M2	ODF3B_MOUSE	8.59585e-05	1.45362		P97436	NKX31_MOUSE	4.58523e-08	2.72247		Q61009	SCRB1_MOUSE	0.00251286	2.78247
	Q91YQ5	RPN1_MOUSE	0.000340361	1.44792		Q9D5K4	S1PBP_MOUSE	1.52677e-08	2.23917		Q64475	H2B1B_MOUSE	1.10327e-06	2.50179
	Q99JZ0	SDCB2_MOUSE	8.17897e-11	1.38835		P61514	RL37A_MOUSE	0.00262263	2.12983		P84228	H32_MOUSE	3.26746e-07	2.49256
	P28231	CXB3_MOUSE	5.63257e-07	1.34841		Q8BMF4	ODP2_MOUSE	1.84e-07	1.95779		P62806	H4_MOUSE	1.65693e-07	2.42066
	A2CG49	KALRN_MOUSE	2.4617e-06	1.30009		Q9D2G2	ODO2_MOUSE	3.86273e-06	1.90452		Q91YQ5	RPN1_MOUSE	0.000340361	2.27248
	Q9JJI8	RL38_MOUSE	7.68749e-05	1.26545		Q9JKA5	GPA33_MOUSE	8.26515e-05	1.67308		Q9D180	CFA57_MOUSE	7.96389e-06	2.25037
	Q9ER00	STX12_MOUSE	1.1412e-05	1.23956		Q91XQ0	DYH8_MOUSE	1.84328e-05	1.6072		Q9D5K4	S1PBP_MOUSE	1.52677e-08	2.23985
	Q8VHB5	CAH9_MOUSE	0.000137561	1.21922		P06869	UROK_MOUSE	1.5331e-12	1.59198		P10922	H10_MOUSE	2.69018e-07	2.21027
	Q9D5K4	S1PBP_MOUSE	1.52677e-08	1.1575		P08207	S10AA_MOUSE	0.000665677	1.57422		Q3THW5	H2AV_MOUSE	7.0471e-08	2.19215
	Q9QZM4	TR10B_MOUSE	0.000353288	1.15044		Q8VHB5	CAH9_MOUSE	0.000137561	1.56651		Q64523	H2A2C_MOUSE	7.80005e-05	2.10823
	Q99LX0	PARK7_MOUSE	0.000440967	1.12446		P08122	CO4A2_MOUSE	3.9501e-06	1.55063		P11157	RIR2_MOUSE	0.00144941	2.04676
Down-regulated	Q69ZL1	FGD6_MOUSE	0.0218267	-0.7519	Down-regulated	P48725	PCNT_MOUSE	0.040746	-0.806893	Down-regulated	Q9R1Q9	VAS1_MOUSE	0.00030324	-0.919306
	O88844	IDHC_MOUSE	4.79027e-06	-0.754708		Q04998	INHBA_MOUSE	2.2353e-07	-0.845956		Q61188	EZH2_MOUSE	0.00179971	-0.933502
	Q04998	INHBA_MOUSE	2.2353e-07	-0.769692		Q8BJR6	PRS27_MOUSE	0.0396437	-0.87228		Q9QWI6	SRCN1_MOUSE	0.0012903	-0.952226
	Q8BJR6	PRS27_MOUSE	0.0396437	-0.802303		Q91ZV0	CTGE5_MOUSE	0.00814287	-0.891195		Q91XE9	CR3L3_MOUSE	0.0100145	-0.95573
	P84104	SRSF3_MOUSE	1.00041e-06	-0.828488		Q8BGA2	LHPL2_MOUSE	0.00545365	-0.917017		P84104	SRSF3_MOUSE	1.00041e-06	-0.956216
	Q8BGA2	LHPL2_MOUSE	0.00545365	-0.864914		P17515	CXL10_MOUSE	2.3273e-05	-0.917124		Q9DCS1	T176A_MOUSE	0.000617279	-0.970984
	Q8K182	CO8A_MOUSE	1.22694e-09	-0.895519		Q99MD9	NASP_MOUSE	0.0271816	-0.965003		Q8BJR6	PRS27_MOUSE	0.0396437	-0.990668
	P50228	CXCL5_MOUSE	0.000412608	-0.953961		A2AM29	AF9_MOUSE	0.00653735	-1.00828		Q8CBR6	TSK_MOUSE	0.000277381	-1.01635
	P63158	HMGB1_MOUSE	3.10311e-05	-1.00572		P10923	OSTP_MOUSE	1.3134e-05	-1.07198		Q6NXH9	K2C73_MOUSE	0.0328162	-1.01815
	P11276	FINC_MOUSE	0.00066731	-1.00843		P50228	CXCL5_MOUSE	0.000412608	-1.07978		Q8BGA2	LHPL2_MOUSE	0.00545365	-1.04912
	P29416	HEXA_MOUSE	1.00758e-05	-1.04648		Q6NXH9	K2C73_MOUSE	0.0328162	-1.10833		Q61581	IBP7_MOUSE	2.48437e-09	-1.12222
	P39876	TIMP3_MOUSE	4.75364e-07	-1.07713		P39876	TIMP3_MOUSE	4.75364e-07	-1.127		P17095	HMGA1_MOUSE	7.86042e-06	-1.25219
	P26369	U2AF2_MOUSE	0.000697456	-1.1172		Q9DCS1	T176A_MOUSE	0.000617279	-1.14055		P29416	HEXA_MOUSE	1.00758e-05	-1.30606
	O54819	TFPI1_MOUSE	1.04975e-05	-1.15029		P84104	SRSF3_MOUSE	1.00041e-06	-1.18216		P50228	CXCL5_MOUSE	0.000412608	-1.33472
	Q61805	LBP_MOUSE	2.76022e-06	-1.28527		P29416	HEXA_MOUSE	1.00758e-05	-1.19414		Q8K182	CO8A_MOUSE	1.22694e-09	-1.38587
	P17095	HMGA1_MOUSE	7.86042e-06	-1.43773		Q62159	RHOC_MOUSE	0.0396003	-1.56319		Q04998	INHBA_MOUSE	2.2353e-07	-1.45002
	Q8VDQ9	KRI1_MOUSE	0.00243182	-1.54723		Q61805	LBP_MOUSE	2.76022e-06	-1.5779		P39876	TIMP3_MOUSE	4.75364e-07	-1.45025
	Q91XE9	CR3L3_MOUSE	0.0100145	-1.59547		P17095	HMGA1_MOUSE	7.86042e-06	-1.7453		Q61805	LBP_MOUSE	2.76022e-06	-1.47
	P97430	SLPI_MOUSE	6.2946e-09	-2.43269		P97430	SLPI_MOUSE	6.2946e-09	-2.42049		P97430	SLPI_MOUSE	6.2946e-09	-2.44314
	P56203	CATW_MOUSE	4.94075e-16	-2.53416		P56203	CATW_MOUSE	4.94075e-16	-2.43294		P56203	CATW_MOUSE	4.94075e-16	-4.03712
